# Supplementary material for: Sugar sensation and mechanosensation in the egg-laying preference shift of Drosophila suzukii
Source: eLife. 2022 Nov 18;11:e81703. doi: 10.7554/eLife.81703 (PMC9674340; doi:10.7554/eLife.81703)
Supplement: Supplementary file 1. [file elife-81703-supp1.xlsx]

## Sheet: Dmel FPKM
tracking_id	gene_short_name	FPKM rep1	FPKM rep2	FPKM rep3	FPKM rep4	average FPKM
FBgn0000003	7SLRNA:CR32864	655.699	367.379	320.207	395.123	434.602
FBgn0000008	a	13.8952	6.36331	9.37758	7.13183	9.19198
FBgn0000014	abd-A	0.00933135	0	0	0.00800073	0.00433302
FBgn0000015	Abd-B	0.0248214	0.0104243	0.0604601	0.00708729	0.0256983
FBgn0000017	Abl	15.2139	7.04332	8.87568	6.21034	9.33581
FBgn0000018	abo	7.08021	3.11978	2.53677	2.08859	3.70634
FBgn0000022	ac	0.571158	0	0	0	0.14279
FBgn0000024	Ace	27.3165	20.7667	18.101	14.824	20.2521
FBgn0000028	acj6	1.41859	10.158	14.3277	10.8746	9.19472
FBgn0000032	Acph-1	16.3337	2.92602	5.24843	2.78816	6.82408
FBgn0000036	nAChRalpha1	0	0	0	0.00275536	0.00068884
FBgn0000037	mAChR-A	4.67595	3.09218	4.89862	3.00888	3.91891
FBgn0000038	nAChRbeta1	0.110269	0.0495476	0.12116	0.151027	0.108001
FBgn0000039	nAChRalpha2	0	0	0	0	0
FBgn0000042	Act5C	721.078	303.64	361.434	207.422	398.393
FBgn0000043	Act42A	52.2446	12.4845	20.8172	8.31416	23.4651
FBgn0000044	Act57B	379.265	167.462	95.4768	79.9254	180.532
FBgn0000045	Act79B	3060.92	1235.24	779.136	503.806	1394.78
FBgn0000046	Act87E	1131.66	628.271	313.886	276.897	587.678
FBgn0000047	Act88F	79.2054	15.7075	9.15529	6.32677	27.5987
FBgn0000052	Pfas	9.31096	3.73631	3.96311	2.49276	4.87578
FBgn0000053	Gart	7.95601	3.18227	5.14065	2.26748	4.6366
FBgn0000055	Adh	2096.17	789.865	513.613	496.649	974.074
FBgn0000056	Adhr	0	3.10166e-223	0	0	7.75415e-224
FBgn0000057	adp	17.8046	6.79265	6.89577	5.13621	9.15731
FBgn0000061	al	3.77266	0.562952	1.33652	0.784334	1.61412
FBgn0000063	Mps1	3.31824	0.23593	0.547168	0.281915	1.09581
FBgn0000064	Ald1	1505.41	924.359	856.806	669.368	988.986
FBgn0000071	Ama	6.27858	0	0	0	1.56964
FBgn0000075	amd	30.3783	11.5862	13.28	12.8111	17.0139
FBgn0000077	amx	15.9863	5.60869	7.09821	4.58599	8.3198
FBgn0000078	Amy-d	0.122918	0.0214645	0	0.0640502	0.0521082
FBgn0000079	Amy-p	0.0990951	0.151446	0	0	0.0626353
FBgn0000083	AnxB9	491.431	269.981	220.916	171.969	288.574
FBgn0000084	AnxB10	181.221	81.4036	65.1564	56.8997	96.1702
FBgn0000092	CG2650	0.799991	0	0.371714	0.519632	0.422834
FBgn0000094	Anp	0	0	0	0	0
FBgn0000097	aop	14.7488	8.50785	7.65943	7.10668	9.50569
FBgn0000100	RpLP0	988.438	452.596	259.851	257.226	489.528
FBgn0000108	Appl	47.6753	506.63	569.89	544.969	417.291
FBgn0000109	Aprt	10.0668	1.69414	1.82504	2.64026	4.05656
FBgn0000114	bru1	46.2013	10.7429	203.082	47.8403	76.9666
FBgn0000115	Arl1	47.2044	20.7002	19.376	14.7425	25.5058
FBgn0000116	Argk	4090.17	8906.05	14085.4	4579.48	7915.27
FBgn0000117	arm	135.388	53.7704	48.4819	38.6649	69.0763
FBgn0000119	arr	5.03631	1.9575	1.58797	1.36874	2.48763
FBgn0000120	Arr1	4.88879	1.29717	2.20891	2.53036	2.73131
FBgn0000121	Arr2	0.128227	0.313821	0.408361	0.222922	0.268333
FBgn0000137	ase	0.0623069	0.0673847	0.0334911	0.0805533	0.060934
FBgn0000139	ash2	31.8559	13.4583	10.1275	10.0369	16.3697
FBgn0000140	asp	7.71542	0.0438686	3.51392	0.350187	2.90585
FBgn0000146	aub	7.22295	0.0460306	1.3738	0.263842	2.22666
FBgn0000147	aurA	8.28114	1.55645	2.5959	0.654089	3.27189
FBgn0000150	awd	719.1	213.447	243.466	174.657	337.667
FBgn0000152	Axs	12.1456	4.81914	4.26452	4.07058	6.32496
FBgn0000153	b	56.4664	16.8838	13.0934	12.3578	24.7004
FBgn0000157	Dll	79.7703	82.8965	89.4604	60.5312	78.1646
FBgn0000158	bam	2.83828	0	0.442815	0.0515058	0.83315
FBgn0000163	baz	24.7462	29.3968	29.2844	29.6932	28.2802
FBgn0000166	bcd	7.47965	0	1.03342	0.230923	2.186
FBgn0000173	ben	206.12	1342.9	1355.88	1688.07	1148.24
FBgn0000179	bi	17.2652	150.805	150.325	194.904	128.325
FBgn0000180	bib	4.34648	0.029254	0.0323149	0.00972105	1.10444
FBgn0000181	bic	368.676	152.834	149.777	85.6944	189.245
FBgn0000182	BicC	0.000309094	1.40154e-05	7.52543	1.43421	2.23999
FBgn0000183	BicD	25.7906	10.7265	12.7011	8.45126	14.4174
FBgn0000206	boss	4.19347	2.30432	3.87987	2.65829	3.25899
FBgn0000212	brm	32.9605	10.8854	12.5287	9.4419	16.4541
FBgn0000216	Brd	3.89082	0	0	0	0.972705
FBgn0000221	brn	5.68678	2.0309	1.16111	1.24987	2.53216
FBgn0000227	Bsg25A	12.9835	0	0	0	3.24587
FBgn0000228	Bsg25D	34.1372	5.83794	7.44247	6.21801	13.4089
FBgn0000229	bsk	37.1708	19.3624	23.0677	13.5309	23.2829
FBgn0000233	btd	4.79735	4.49007	5.31131	2.68068	4.31985
FBgn0000239	bur	39.9009	13.4988	13.426	9.42053	19.0616
FBgn0000241	bw	0.0151181	0	0	0	0.00377953
FBgn0000244	by	99.4267	61.856	52.7969	37.3767	62.8641
FBgn0000246	c(3)G	3.61498	0.941059	1.7982	0.937636	1.82297
FBgn0000247	ca	15.1484	6.37378	9.88076	6.8306	9.55838
FBgn0000250	cact	214.335	264.382	263.172	332.475	268.591
FBgn0000251	cad	11.7256	0.0418857	2.13965	0.556989	3.61603
FBgn0000253	Cam	640.166	3089.92	4018.6	4322.62	3017.83
FBgn0000256	capu	10.5835	7.21615	11.9601	8.48017	9.55998
FBgn0000257	car	6.60757	3.40749	2.82295	2.18864	3.75666
FBgn0000259	CkIIbeta	56.8639	178.462	203.365	233.726	168.104
FBgn0000261	Cat	231.4	108.921	70.5217	70.0068	120.212
FBgn0000273	Pka-C1	76.2145	320.985	309.113	337.993	261.076
FBgn0000274	Pka-C2	0.179957	0	0.0436611	0	0.0559045
FBgn0000276	CecA1	3.48002	0	1.52581	0.887975	1.47345
FBgn0000277	CecA2	0	0	0	0.599563	0.149891
FBgn0000278	CecB	3.14821	0	0	1.65283	1.20026
FBgn0000279	CecC	8.48273	3.79973	0.995778	1.83603	3.77857
FBgn0000280	Cec-Psi1	0	0	0	0	0
FBgn0000281	Cec2	0	0	0	0	0
FBgn0000283	Cp190	40.3778	12.7399	15.271	9.50706	19.4739
FBgn0000286	Cf2	21.9474	32.887	37.8608	38.7054	32.8501
FBgn0000287	salr	0.442215	0.0360025	0.263512	0.275364	0.254273
FBgn0000289	cg	41.9243	18.5756	22.9903	16.0291	24.8798
FBgn0000299	Col4a1	87.4755	45.5663	55.6325	33.6643	55.5846
FBgn0000303	ChAT	13.4782	74.902	74.5831	119.042	70.5013
FBgn0000307	chif	16.2648	6.57086	7.84945	6.66039	9.33638
FBgn0000308	chic	579.526	1888.18	2012.64	1662.07	1535.6
FBgn0000316	cin	33.0303	11.3634	10.7025	8.04892	15.7863
FBgn0000317	ck	13.4179	5.61542	6.15942	4.46404	7.4142
FBgn0000318	cl	215.75	93.4386	92.7649	68.5064	117.615
FBgn0000319	Chc	100.742	44.9943	45.3794	37.158	57.0684
FBgn0000320	eya	1.43132	0.356053	0.520098	0.394171	0.67541
FBgn0000326	clt	22.9824	8.55877	6.40535	5.89163	10.9595
FBgn0000330	cm	23.9891	9.28623	10.7058	8.68788	13.1673
FBgn0000337	cn	0.0217724	0	0	0.0754549	0.0243068
FBgn0000339	cni	78.7869	29.5372	24.7452	23.8524	39.2304
FBgn0000346	comt	22.3325	10.2581	13.3287	8.18413	13.5259
FBgn0000351	cort	5.05792	0.145136	1.3876	0.497823	1.77212
FBgn0000352	cos	7.03939	1.59856	1.97184	1.28967	2.97487
FBgn0000355	Cp15	5.55579	2.19188	4.27754	14.5454	6.64265
FBgn0000356	Cp16	8.11185	3.21308	105.802	13.553	32.67
FBgn0000357	Cp18	34.9548	2.75488	1028.65	14.1209	270.12
FBgn0000358	Cp19	14.6081	1.71389	203.44	18.9228	59.6712
FBgn0000359	Cp36	5.65747	0.0994411	49.6056	1.15139	14.1285
FBgn0000360	Cp38	6.28995	0.548731	227.155	3.66804	59.4154
FBgn0000370	crc	560.203	281.056	237.273	200.695	319.807
FBgn0000376	crm	12.4088	3.34571	3.87807	2.58029	5.55322
FBgn0000377	crn	19.8042	5.09047	5.50146	4.32604	8.68054
FBgn0000382	csw	49.4993	63.4338	85.5466	77.0623	68.8855
FBgn0000384	cta	8.85213	3.04707	3.83844	2.58875	4.5816
FBgn0000392	cup	22.5614	0.0677757	7.2866	0.734218	7.6625
FBgn0000394	cv	91.2945	47.2081	39.77	30.8551	52.2819
FBgn0000395	cv-2	33.208	93.5022	90.7022	116.578	83.4976
FBgn0000404	CycA	79.0206	0.255135	16.4108	3.20273	24.7223
FBgn0000405	CycB	164.571	0.90339	42.9132	6.43112	53.7047
FBgn0000406	Cyt-b5-r	0.600227	0	0.405319	0.189987	0.298883
FBgn0000411	D	5.72928	1.73427	1.85927	1.16906	2.62297
FBgn0000412	D1	97.415	322.203	411.146	374.434	301.3
FBgn0000414	Dab	14.8153	7.92341	9.21393	6.25902	9.55292
FBgn0000416	Sap-r	409.545	198.278	152.279	126.597	221.675
FBgn0000422	Ddc	47.5403	16.8953	24.948	15.4152	26.1997
FBgn0000426	SmF	45.8674	7.93759	10.3617	6.36103	17.6319
FBgn0000427	2022-12-01	11.9639	0	18.6194	0.0943133	7.6694
FBgn0000439	Dfd	0.232817	0	0.0489861	0.0235704	0.0763434
FBgn0000442	Pkg21D	1.75015	0.352966	0.438586	0.728476	0.817545
FBgn0000447	Dhod	32.7631	10.2422	10.8434	7.54877	15.3494
FBgn0000448	Hr3	2.41327	17.2955	18.976	14.6858	13.3426
FBgn0000449	dib	1.26927	0	0	0.0168865	0.321539
FBgn0000451	ect	0.379513	0.304034	0.484351	0.441307	0.402301
FBgn0000454	Dip-B	63.5862	26.771	32.7002	18.7519	35.4523
FBgn0000455	Dip-C	25.5021	10.6795	7.87566	6.47675	12.6335
FBgn0000459	disco	5.25583	35.4027	36.3938	47.8045	31.2142
FBgn0000463	Dl	11.1817	14.6359	21.0933	15.9116	15.7056
FBgn0000464	Lar	10.6448	4.03342	8.05183	4.19205	6.73053
FBgn0000473	Cyp6a2	384.669	129.269	80.9369	103.013	174.472
FBgn0000477	DNaseII	18.3355	8.16586	7.73625	7.2023	10.36
FBgn0000479	dnc	85.8006	701.482	739.592	781.39	577.066
FBgn0000482	dor	8.54644	3.57662	2.78682	2.93906	4.46224
FBgn0000489	Pka-C3	119.674	620.918	617.549	891.517	562.415
FBgn0000490	dpp	8.71517	8.25628	6.61522	7.11284	7.67488
FBgn0000492	Dr	5.62936	5.60743	3.40709	2.99065	4.40863
FBgn0000499	dsh	23.4293	14.1813	14.4664	14.529	16.6515
FBgn0000500	Dsk	2.97888	0.760073	2.16276	0.995937	1.72441
FBgn0000504	dsx	20.964	14.459	13.2077	10.9094	14.885
FBgn0000520	dwg	8.52232	1.98802	2.1032	3.09357	3.92678
FBgn0000524	dx	7.68461	2.30488	2.46405	1.88648	3.58501
FBgn0000527	e	15.2386	9.0047	6.63208	4.83869	8.92852
FBgn0000529	bsh	0	0	0.0550395	0	0.0137599
FBgn0000533	ea	26.7377	7.24267	6.88596	5.98086	11.7118
FBgn0000535	eag	4.36475	21.9643	26.0484	30.896	20.8184
FBgn0000536	eas	190.209	105.04	152.471	83.8314	132.888
FBgn0000541	E(bx)	24.0611	11.5565	13.9821	9.05656	14.6641
FBgn0000542	ec	4.61177	4.11357	6.46358	4.17462	4.84089
FBgn0000543	ecd	23.447	12.8626	9.47311	12.5556	14.5846
FBgn0000546	EcR	15.2212	8.64649	9.18164	6.95497	10.0011
FBgn0000547	ed	39.126	114.686	140.248	135.364	107.356
FBgn0000551	Edg78E	1.34326	0.039721	1.48296	1.50717	1.09328
FBgn0000552	Edg84A	0	0	0	0	0
FBgn0000557	eEF1alpha2	151.289	68.4451	36.6354	34.4037	72.6933
FBgn0000559	eEF2	1274.7	452.614	303.039	260.413	572.692
FBgn0000560	eg	0.110069	0.192788	0	0.119788	0.105661
FBgn0000562	egl	26.5444	12.2049	12.9934	10.5782	15.5802
FBgn0000564	Eh	0	0	0	0	0
FBgn0000565	Eip71CD	102.911	44.3096	42.091	28.3039	54.4039
FBgn0000566	Eip55E	39.8071	12.0275	16.9417	10.1162	19.7231
FBgn0000567	Eip74EF	3.4183	2.74896	3.25557	2.62642	3.01231
FBgn0000568	Eip75B	36.0326	246.77	260.352	273.083	204.059
FBgn0000575	emc	43.5649	67.4226	51.2868	61.8136	56.022
FBgn0000576	ems	8.64744	6.67465	5.08104	4.92803	6.33279
FBgn0000577	en	1.77921	0.86237	1.37376	0.845898	1.21531
FBgn0000578	ena	13.2394	6.19338	6.24328	5.06898	7.68626
FBgn0000579	Eno	775.938	309.627	228.887	193.392	376.961
FBgn0000581	E(Pc)	16.704	7.24247	8.40516	5.98657	9.58455
FBgn0000588	esc	8.25766	1.78455	2.93913	3.37148	4.08821
FBgn0000591	E(spl)m8-HLH	0.476607	0	0	0	0.119152
FBgn0000592	Est-6	45.6974	11.6059	10.0753	5.87349	18.313
FBgn0000594	Est-P	0	0.0195776	0	0.0389604	0.0146345
FBgn0000606	eve	4.43257	0	0	0.0747608	1.12683
FBgn0000611	exd	53.2635	27.8988	25.8726	16.8127	30.9619
FBgn0000615	exu	19.1909	0.124034	6.79157	1.36421	6.86768
FBgn0000617	e(y)1	17.46	5.28967	5.76542	3.32612	7.9603
FBgn0000618	e(y)2	26.092	15.1498	10.879	10.159	15.5699
FBgn0000625	eyg	1.53796	11.8034	14.4011	19.9092	11.9129
FBgn0000629	E(z)	11.0727	3.17226	3.63925	3.25286	5.28427
FBgn0000633	CG17716	0.147553	0.158077	0.0960556	0.215554	0.15431
FBgn0000635	Fas2	54.2031	164.668	196.268	191.753	151.723
FBgn0000636	Fas3	34.1833	67.9899	63.9686	72.2507	59.5981
FBgn0000639	Fbp1	0	0	0	0	0
FBgn0000640	Fbp2	0.405758	0.592019	0.41444	0.270538	0.420689
FBgn0000644	Fcp3C	2.10545	1.15807	2.28014	0.514554	1.51455
FBgn0000658	fj	2.04788	3.25682	2.09783	3.80031	2.80071
FBgn0000659	fkh	1.57263	1.99273	1.79814	1.46624	1.70744
FBgn0000662	fl(2)d	35.4979	15.5409	22.3678	17.7464	22.7882
FBgn0000667	Actn	296.321	102.06	97.1814	72.9122	142.119
FBgn0000709	fliI	14.6056	14.9944	19.309	20.7607	17.4174
FBgn0000711	flw	51.8297	256.83	260.339	342.984	227.996
FBgn0000715	FMRFa	0.0562306	0.172455	0	0.0489805	0.0694165
FBgn0000719	fog	20.4626	20.1965	29.7676	16.3959	21.7056
FBgn0000721	for	47.7587	23.242	27.7536	30.0792	32.2084
FBgn0000723	FER	30.0196	24.9476	31.0654	34.3631	30.0989
FBgn0000808	gd	1.35037	0.591472	1.28184	0.296091	0.879943
FBgn0000810	fs(1)K10	8.50484	4.35588	3.82654	2.78961	4.86922
FBgn0000826	png	8.22279	0.199325	2.80477	0.560485	2.94684
FBgn0000927	fs(1)Ya	10.5062	0	5.20249	0.515143	4.05596
FBgn0000928	fs(1)Yb	0.0738408	0	0.04514	0	0.0297452
FBgn0000964	tj	0.497286	0	1.04139	0.00908127	0.386939
FBgn0000996	dup	21.0223	0.351415	3.8032	0.886589	6.51588
FBgn0001075	ft	0.424483	0.251129	0.292852	0.34386	0.328081
FBgn0001077	ftz	4.7061	0	0.285478	0.133397	1.28124
FBgn0001078	ftz-f1	17.2594	17.3676	22.9007	25.0352	20.6407
FBgn0001079	fu	9.32289	2.12363	2.41913	2.0092	3.96871
FBgn0001083	fw	10.3131	7.21515	10.7075	6.81145	8.7618
FBgn0001084	fy	5.53942	1.45702	1.57776	1.18148	2.43892
FBgn0001085	fz	5.05828	1.50813	1.57906	0.975037	2.28013
FBgn0001086	fzy	24.146	0	4.12338	0.700894	7.24257
FBgn0001087	g	16.6565	20.6432	29.1952	38.1642	26.1648
FBgn0001089	Gal	22.1459	8.91425	6.8726	6.30994	11.0607
FBgn0001090	bnb	178.457	117.572	132.254	90.6094	129.723
FBgn0001091	Gapdh1	1413.52	490.684	307.627	266.273	619.526
FBgn0001092	Gapdh2	868.851	311.476	225.424	192.237	399.497
FBgn0001098	Gdh	426.767	171.316	139.255	112.955	212.573
FBgn0001099	gdl	11.1142	1.36943	3.09551	1.94538	4.38113
FBgn0001104	Galphai	54.5726	24.5984	22.5904	24.8774	31.6597
FBgn0001105	Gbeta13F	148.522	1118.87	1170.23	1312.16	937.446
FBgn0001108	DCTN1-p150	31.0712	10.4653	8.443	9.5595	14.8848
FBgn0001112	Gld	13.8814	12.6895	6.80862	5.30921	9.67218
FBgn0001114	Glt	47.525	19.7228	17.6635	14.1695	24.7702
FBgn0001120	gnu	32.576	1.09699	25.3806	3.30233	15.589
FBgn0001122	Galphao	24.0259	46.2313	49.314	50.2294	42.4502
FBgn0001123	Galphas	39.3823	22.2888	22.7679	16.3856	25.2061
FBgn0001124	Got1	156.337	73.2579	49.7029	45.3242	81.1555
FBgn0001125	Got2	249.352	101.362	99.389	81.4879	132.898
FBgn0001128	Gpdh1	431.129	184.084	188.206	131.999	233.855
FBgn0001133	grau	16.565	6.52567	6.465	5.6813	8.80924
FBgn0001134	Grd	0.0180114	0	0	0.0308777	0.0122223
FBgn0001137	grk	17.8008	6.3963	5.80707	4.36793	8.59302
FBgn0001138	grn	12.7728	46.0513	63.6032	47.6019	42.5073
FBgn0001139	gro	57.2621	149.67	214.18	205.644	156.689
FBgn0001142	Gs1	48.3637	9.96455	9.89365	6.46659	18.6721
FBgn0001145	Gs2	718.983	768.274	976.986	749.295	803.385
FBgn0001147	gsb-n	0.255584	0	0.146749	0.235262	0.159399
FBgn0001148	gsb	0.214772	0	0	0.144985	0.0899392
FBgn0001149	GstD1	3158.38	1828.53	1434.16	1031.03	1863.02
FBgn0001150	gt	3.63683	0.801232	0.52137	0.626468	1.39647
FBgn0001168	h	106.214	86.167	122.989	57.1982	93.142
FBgn0001169	H	11.0592	2.92977	5.30574	2.1069	5.3504
FBgn0001170	H2.0	0.0236541	0	0	0	0.00591353
FBgn0001174	halo	35.6726	0	0.492857	0	9.04136
FBgn0001179	hay	7.80328	1.72918	1.92782	1.95589	3.35404
FBgn0001180	hb	11.4701	2.47289	2.67056	1.29499	4.47713
FBgn0001185	her	10.5525	4.36231	5.05209	4.75911	6.1815
FBgn0001186	Hex-A	229.132	772.942	752.554	1089.1	710.932
FBgn0001187	Hex-C	0.106804	0.0233635	0	0	0.0325419
FBgn0001189	hfw	17.0641	9.57817	7.31699	5.62935	9.89715
FBgn0001197	His2Av	178.314	79.4288	103.314	76.1377	109.299
FBgn0001202	hook	24.3551	8.57782	12.4578	10.6092	14
FBgn0001206	Hmr	7.82892	1.92494	4.45373	1.19591	3.85087
FBgn0001208	Hn	110.632	48.8182	39.168	33.2822	57.9751
FBgn0001215	Hrb98DE	155.716	69.3283	89.5191	53.3067	91.9675
FBgn0001216	Hsc70-1	112.22	28.492	18.3757	22.3006	45.3471
FBgn0001217	Hsc70-2	2.21477	0.137149	0.530134	0.182106	0.76604
FBgn0001218	Hsc70-3	243.187	108.174	141.425	66.5308	139.829
FBgn0001220	Hsc70-5	111.821	41.855	34.4814	34.3314	55.6222
FBgn0001222	Hsf	27.7795	10.5317	12.3892	9.27956	14.995
FBgn0001223	Hsp22	35.8323	32.1709	24.8166	18.9523	27.943
FBgn0001224	Hsp23	11.6993	4.48914	3.62063	2.16711	5.49404
FBgn0001225	Hsp26	92.9654	8.28173	43.9135	17.8907	40.7628
FBgn0001226	Hsp27	68.1074	23.6824	237.993	83.8956	103.42
FBgn0001227	Hsp67Ba	0.451441	0.118007	0.146593	0.371825	0.271966
FBgn0001228	CG4456	0.28391	1.83264e-07	1.02451e-07	1.36137e-07	0.0709776
FBgn0001229	Hsp67Bc	0.260778	0.038691	0.0640376	0.153434	0.129235
FBgn0001230	Hsp68	4.01586	2.02866	2.08512	1.81394	2.4859
FBgn0001233	Hsp83	195.969	73.3114	64.7803	51.6075	96.4171
FBgn0001234	lncRNA:Hsromega	124.981	66.2652	58.5683	59.2634	77.2695
FBgn0001235	hth	9.12277	27.7625	30.1281	29.2741	24.0719
FBgn0001247	Ide	42.2902	18.7108	17.6111	13.4301	23.0105
FBgn0001248	Idh	456.099	217.335	130.105	126.536	232.519
FBgn0001250	if	55.5652	42.6471	45.3323	41.7877	46.3331
FBgn0001253	ImpE1	0.00596908	0	0.00848224	0.025543	0.00999858
FBgn0001254	ImpE2	0.550598	0	0	0.179067	0.182416
FBgn0001255	ImpE3	0.613911	0	0.787447	0.606881	0.50206
FBgn0001256	ImpL1	0.179292	0.0633218	0.131123	0.251401	0.156284
FBgn0001257	ImpL2	148.747	709.441	740.582	838.08	609.212
FBgn0001258	Ldh	7.26722	3.36408	2.39665	2.57416	3.90053
FBgn0001259	in	4.2559	1.66703	1.82403	1.2227	2.24241
FBgn0001263	inaD	0	0	0	0	0
FBgn0001269	inv	2.49224	1.07961	0.85806	0.988083	1.3545
FBgn0001276	ix	20.5949	3.03504	5.1643	5.88019	8.66861
FBgn0001280	janA	49.9551	9.85582	14.0459	8.52451	20.5953
FBgn0001281	janB	0	0	0	0	0
FBgn0001285	Jon44E	0.146165	0	0.125499	0.043195	0.0787147
FBgn0001291	Jra	63.104	32.6616	25.6113	23.4811	36.2145
FBgn0001296	kar	17.5763	6.65683	9.8471	6.61973	10.175
FBgn0001297	kay	90.1724	52.3229	51.7559	41.2916	58.8857
FBgn0001301	kel	7.27773	1.77566	2.26104	1.90737	3.30545
FBgn0001308	Khc	56.1486	24.3947	28.7321	19.4648	32.1851
FBgn0001311	kkv	0.15736	0.22487	0.18871	0.123392	0.173583
FBgn0001313	kl-2	0	0	0	0	0
FBgn0001316	klar	40.5516	36.186	46.7048	36.0793	39.8804
FBgn0001319	kn	0.751182	0.564722	0.337414	0.302065	0.488846
FBgn0001320	kni	25.453	88.7675	87.4947	106.692	77.1018
FBgn0001321	knk	6.40779	4.4187	3.07718	2.83048	4.18354
FBgn0001323	knrl	10.788	91.5466	95.9634	105.334	75.908
FBgn0001324	kto	8.07913	3.83858	5.34379	4.61506	5.46914
FBgn0001325	Kr	2.30572	0	0	0	0.57643
FBgn0001330	kz	4.75294	1.22744	1.564	1.05844	2.15071
FBgn0001341	Mybbp1A	9.00085	1.41272	1.24182	0.841748	3.12428
FBgn0001404	egh	125.368	461.066	451.996	613.068	412.874
FBgn0001491	l(1)10Bb	34.4728	11.4667	7.9756	8.52147	15.6091
FBgn0001565	Hlc	82.1737	27.7527	27.2203	22.715	39.9654
FBgn0001612	Grip91	8.22585	2.17902	2.43903	1.33904	3.54573
FBgn0001624	dlg1	59.6823	168.851	187.38	221.508	159.355
FBgn0001941	ifc	54.1569	23.435	23.6669	15.2681	29.1317
FBgn0001942	eIF4A	831.427	365.731	241.759	220.197	414.779
FBgn0001961	Arpc1	47.8321	19.1298	14.5712	16.1816	24.4287
FBgn0001965	Sos	12.3455	5.27532	6.64803	5.23575	7.37615
FBgn0001967	NimC3	0.156621	0.7973	0	0.185698	0.284905
FBgn0001970	Pgant35A	11.8071	3.17713	3.99191	2.91933	5.47387
FBgn0001977	CIAPIN1	19.0528	6.57491	7.0963	6.10525	9.70731
FBgn0001978	stc	22.4131	6.48389	8.65584	5.26127	10.7035
FBgn0001981	esg	1.3564	0.0290109	0.384486	0.390076	0.539993
FBgn0001983	wor	0.0514924	0	0	0	0.0128731
FBgn0001986	Mtr4	10.6929	2.09026	2.20142	1.81036	4.19874
FBgn0001987	Gli	24.0309	10.6439	9.19246	10.2902	13.5394
FBgn0001989	ND-B17	206.294	77.0489	61.2459	56.7535	100.336
FBgn0001990	wek	11.1355	2.9908	3.44767	1.75207	4.83151
FBgn0001991	Ca-alpha1D	18.5538	25.4592	36.8592	32.0812	28.2383
FBgn0001992	Cyp303a1	0.0429046	0	0.108243	0.0557443	0.051723
FBgn0001994	crp	35.5904	162.871	155.296	232.24	146.499
FBgn0001995	mRpL4	32.4597	8.95682	6.57518	7.24675	13.8096
FBgn0002021	l(2)37Bb	20.5557	10.3386	6.8396	6.04848	10.9456
FBgn0002022	Catsup	43.6916	13.7101	10.8204	10.2153	19.6094
FBgn0002023	Lim3	0.242006	0.317338	0.140675	0.233084	0.233276
FBgn0002031	l(2)37Cc	72.9045	27.472	28.6145	18.7586	36.9374
FBgn0002036	CG10561	31.2685	9.03566	8.65498	7.41072	14.0925
FBgn0002044	swm	44.1447	106.047	127.287	108.471	96.4874
FBgn0002069	AspRS	33.9588	15.6214	12.7616	10.0132	18.0888
FBgn0002121	l(2)gl	13.4934	8.77474	9.24184	6.55231	9.51557
FBgn0002174	CG5504	30.5399	8.10388	8.64252	8.73738	14.0059
FBgn0002183	dre4	20.0754	3.83826	7.44013	5.17609	9.13247
FBgn0002283	l(3)73Ah	15.8118	5.4489	7.68258	4.39565	8.33473
FBgn0002284	Prosbeta6	187.414	61.9138	54.6569	49.6608	88.4114
FBgn0002306	sas	43.3655	25.1233	24.0069	17.8907	27.5966
FBgn0002354	l(3)87Df	35.7789	12.2786	17.1969	10.8329	19.0218
FBgn0002413	dco	51.4371	75.2054	72.6359	93.0785	73.0892
FBgn0002431	hyd	25.2345	12.3256	19.0912	10.7327	16.846
FBgn0002440	l(3)mbn	0	0	0.0182735	0	0.00456838
FBgn0002441	l(3)mbt	17.7613	7.52627	7.3194	5.31982	9.4817
FBgn0002466	sti	7.85669	0.0764048	0.87824	0.223687	2.25876
FBgn0002521	pho	13.776	8.42632	8.67641	5.84927	9.182
FBgn0002522	lab	0.121546	0.139923	0.0386379	0.0892691	0.097344
FBgn0002524	lace	28.1226	9.06074	9.77939	8.05267	13.7538
FBgn0002525	Lam	24.9972	6.62991	8.47527	5.61323	11.4289
FBgn0002526	LanA	9.82576	5.26653	5.49805	3.72819	6.07963
FBgn0002531	Lcp1	0.290221	0	0	0	0.0725553
FBgn0002533	Lcp2	0.0975468	0	0	0	0.0243867
FBgn0002534	Lcp3	0	0.200593	0.248425	0	0.112255
FBgn0002535	Lcp4	0	0	0	0	0
FBgn0002542	lds	7.82546	1.39914	3.054	1.28769	3.39157
FBgn0002543	robo2	2.93051	0.567914	0.643964	0.705849	1.21206
FBgn0002552	lin	14.9086	4.33096	3.25027	3.41837	6.47705
FBgn0002561	l(1)sc	1.41502	0	0	0	0.353755
FBgn0002562	Lsp1alpha	0	0	0.0205212	0	0.0051303
FBgn0002563	Lsp1beta	0.115615	0.0624473	0.0103447	0.0248872	0.0533236
FBgn0002564	Lsp1gamma	0.0755001	0.143641	0	0.0130095	0.0580376
FBgn0002565	Lsp2	0.099005	0	0	0.0426985	0.0354259
FBgn0002566	lt	20.0784	8.03066	10.1771	7.89755	11.5459
FBgn0002567	Rab32	28.6746	9.84987	10.0029	7.49931	14.0067
FBgn0002569	Mal-A2	1.35973	0.967248	0.733242	0.424382	0.871151
FBgn0002570	Mal-A1	67.0823	35.8409	24.91	24.5299	38.0908
FBgn0002571	Mal-A3	0.13023	0	0	0.0564127	0.0466607
FBgn0002573	sens	0.0154326	0	0.0442355	0.0265995	0.0215669
FBgn0002576	lz	0.330396	0.175583	0.419624	0.10063	0.256558
FBgn0002577	m	0.108661	0.205852	0.255818	0.307842	0.219543
FBgn0002578	Kaz-m1	1.07454	0	0.434437	0.194373	0.425837
FBgn0002579	RpL36	2062.21	857.849	666.504	533.811	1030.09
FBgn0002590	RpS5a	889.578	469.095	421.83	291.061	517.891
FBgn0002592	E(spl)m2-BFM	6.04918	2.57644	1.76557	2.91263	3.32595
FBgn0002593	RpLP1	1778.25	929.813	559.574	497.381	941.255
FBgn0002609	E(spl)m3-HLH	2.68035	3.2053	1.33819	1.41538	2.1598
FBgn0002622	RpS3	891.348	270.594	208.189	206.455	394.147
FBgn0002626	RpL32	1313.71	581.728	342.668	344.834	645.735
FBgn0002629	E(spl)m4-BFM	3.09094	0	0	0	0.772735
FBgn0002631	E(spl)m5-HLH	0.0999456	0	0	0	0.0249864
FBgn0002632	E(spl)m6-BFM	0	0	0	0.0964551	0.0241138
FBgn0002633	E(spl)m7-HLH	1.04962	0.428378	0.999049	0.849353	0.8316
FBgn0002638	Rcc1	61.9802	5.35137	10.5129	4.14901	20.4984
FBgn0002641	mal	13.3416	4.38212	3.86439	3.73285	6.33024
FBgn0002643	mam	9.47534	20.8116	22.5262	21.9226	18.6839
FBgn0002645	Map205	30.8133	18.0764	14.9386	15.5694	19.8494
FBgn0002673	twe	15.6806	0.581757	2.22945	1.39783	4.97241
FBgn0002707	mei-9	3.8861	0.692449	1.63232	0.961717	1.79315
FBgn0002709	mei-218	3.15432	0.993304	1.53495	0.842609	1.6313
FBgn0002715	mei-S332	6.40518	0.324296	1.84673	0.506725	2.27073
FBgn0002716	mei-W68	1.16266	2.01562	3.22167	2.78352	2.29587
FBgn0002719	Men	208.949	106.239	103.873	70.9717	122.508
FBgn0002723	Met	12.8953	65.4009	66.4365	89.0519	58.4462
FBgn0002732	E(spl)malpha-BFM	1.62766	0.518664	1.55436	1.21518	1.22897
FBgn0002733	E(spl)mbeta-HLH	25.4932	6.2245	8.35823	11.8365	12.9781
FBgn0002734	E(spl)mdelta-HLH	0	0.299434	0	0.0371166	0.0841376
FBgn0002735	E(spl)mgamma-HLH	0.0479877	0	0.177564	0.0850344	0.0776465
FBgn0002736	mago	37.311	12.7804	9.71553	8.24383	17.0127
FBgn0002772	Mlc1	1058.51	461.032	425.716	204.477	537.434
FBgn0002773	Mlc2	1348.72	607.55	363.554	287.552	651.844
FBgn0002774	mle	17.1944	8.43229	9.7679	9.91853	11.3283
FBgn0002775	msl-3	12.924	2.70472	5.76243	3.26836	6.16488
FBgn0002778	mnd	10.5983	1.02583	2.8586	2.09155	4.14357
FBgn0002780	mod	102.567	21.2876	30.3	14.4067	42.1403
FBgn0002781	mod(mdg4)	162.558	34.6481	60.8454	36.1158	73.5418
FBgn0002781	mod(mdg4)	2.32609e-138	9.66883e-30	3.69091	0.00977718	0.925172
FBgn0002783	mor	38.2236	11.7319	11.9225	8.17253	17.5126
FBgn0002787	Rpn8	88.0875	31.6395	29.5251	27.8193	44.2679
FBgn0002789	Mp20	1120.14	542.77	479.621	349.413	622.986
FBgn0002791	mr	10.8313	1.83698	3.07513	2.55469	4.57453
FBgn0002838	ms(3)K81	0	0	0	0	0
FBgn0002842	sa	0.135604	0	0.13343	0	0.0672585
FBgn0002855	Acp26Aa	0	0	0	0	0
FBgn0002856	Acp26Ab	0	0	0	0	0
FBgn0002862	Mst87F	0	0	0	0	0
FBgn0002863	Acp95EF	0	0	0	0	0
FBgn0002865	Mst98Ca	0	0.0270481	0.089575	0	0.0291558
FBgn0002868	MtnA	309.203	198.522	128.942	126.474	190.785
FBgn0002869	MtnB	1.71388	6.42632	0	0	2.03505
FBgn0002872	mu2	6.75797	1.01072	3.72167	1.44683	3.2343
FBgn0002873	mud	7.78505	0.0786565	2.90156	0.373319	2.78465
FBgn0002878	mus101	3.48305	0.930094	2.08344	0.684652	1.79531
FBgn0002887	mus201	3.76711	1.17582	1.15132	0.910128	1.75109
FBgn0002891	DNApol-zeta	3.53577	1.54363	1.46833	1.35352	1.97531
FBgn0002899	mus301	2.16819	0.208533	1.06801	0.283495	0.932057
FBgn0002901	mus304	4.62663	0.355767	0.751072	0.571848	1.57633
FBgn0002905	DNApol-theta	1.72382	0.711861	0.984447	0.64793	1.01701
FBgn0002906	Blm	4.74167	1.17019	1.35205	0.875466	2.03484
FBgn0002909	mus312	6.7445	2.76992	0.0184553	0.0108714	2.38594
FBgn0002914	Myb	28.9735	11.9431	11.3877	8.49312	15.1994
FBgn0002917	na	3.93394	11.4734	12.1645	17.6773	11.3123
FBgn0002921	Atpalpha	580.853	677.61	806.234	725.922	697.655
FBgn0002922	nau	19.7794	13.4044	11.6769	10.506	13.8417
FBgn0002924	ncd	12.0725	0.224767	2.16437	0.517789	3.74486
FBgn0002926	ndl	0.496173	0	1.44098	0	0.484288
FBgn0002930	nec	217.839	96.0346	70.1991	70.4379	113.628
FBgn0002931	net	10.577	6.6005	3.94939	2.5466	5.91837
FBgn0002932	neur	9.26837	2.91084	3.27638	2.61406	4.51741
FBgn0002933	ng1	0	0.194101	0	0.0951404	0.0723103
FBgn0002936	ninaA	0.0507695	0	0	0.13527	0.0465099
FBgn0002937	ninaB	0.158995	0	0.025374	0.137279	0.080412
FBgn0002938	ninaC	0	0	0	0	0
FBgn0002939	ninaD	1.88076	0.105982	0.45788	0.235771	0.670098
FBgn0002940	ninaE	0.0248982	0	0.0180077	0.0216289	0.0161337
FBgn0002941	slou	6.44624	3.53829	4.78446	3.56203	4.58275
FBgn0002945	nkd	5.84112	4.11034	3.90695	3.64482	4.37581
FBgn0002948	nod	11.2041	2.37143	3.52251	2.49188	4.89748
FBgn0002962	nos	14.6836	0	9.74683	0.944818	6.34381
FBgn0002973	numb	29.1724	15.1829	12.3347	12.5532	17.3108
FBgn0002985	odd	3.91401	1.63821	1.11343	1.10181	1.94186
FBgn0002989	okr	5.16974	0.784637	1.3836	1.06126	2.09981
FBgn0003002	opa	2.99767	0	0	0	0.749417
FBgn0003008	or	20.953	8.50116	5.3657	7.24449	10.5161
FBgn0003009	ord	0.0175422	0	0	0	0.00438555
FBgn0003011	ort	0	0	0	0	0
FBgn0003015	osk	29.4411	0.337413	40.5214	4.92074	18.8052
FBgn0003016	osp	37.1461	39.3082	39.681	38.9515	38.7717
FBgn0003023	otu	15.5513	0.0213867	6.39751	0.824911	5.69878
FBgn0003028	ovo	10.4717	16.5874	29.1056	19.9028	19.0169
FBgn0003034	SP	0	0	0	0	0
FBgn0003041	pbl	14.7515	2.8824	3.64601	2.68503	5.99124
FBgn0003042	Pc	7.14156	3.45409	2.86124	2.07786	3.88369
FBgn0003044	Pcl	12.8149	20.1074	35.2887	31.9218	25.0332
FBgn0003046	Pcp	1.69607	1.24765	0.245636	0.821382	1.00268
FBgn0003048	pcx	4.74217	2.69674	2.66626	4.23537	3.58513
FBgn0003053	peb	4.74166	36.8715	53.1408	56.6877	37.8604
FBgn0003057	CG10598	0	0	0	0	0
FBgn0003060	CG9757	0	0	0	0	0
FBgn0003062	Fib	29.5781	5.30624	7.46388	3.84663	11.5487
FBgn0003065	CG2150	0.035421	0	0.207088	0.062093	0.0761505
FBgn0003068	per	9.62301	5.65932	13.0335	8.51748	9.20833
FBgn0003071	Pfk	113.22	38.4542	35.0572	30.7753	54.3767
FBgn0003074	Pgi	202.823	91.4648	65.0764	55.1422	103.627
FBgn0003076	Pgm1	80.5817	21.9877	18.6963	17.1382	34.601
FBgn0003079	Raf	11.4717	3.42592	3.41735	2.37489	5.17246
FBgn0003082	phr	20.5389	5.80639	3.67144	5.67987	8.92415
FBgn0003086	Pig1	0	0	0	0	0
FBgn0003087	pim	20.7593	1.0832	3.23968	1.24772	6.58248
FBgn0003089	pip	1.16674	1.14572	0.945541	0.234626	0.873157
FBgn0003090	pk	5.23865	5.187	5.9107	4.63659	5.24324
FBgn0003091	Pkc53E	8.42695	31.3129	34.0401	53.2596	31.7599
FBgn0003093	Pkc98E	41.0693	266.43	308.535	365.028	245.266
FBgn0003114	plu	7.48883	0	1.47857	0.220208	2.2969
FBgn0003116	pn	11.0842	4.32221	3.50979	2.98464	5.47521
FBgn0003117	pnr	1.22749	0.607039	0.385509	0.33673	0.639192
FBgn0003118	pnt	14.5043	35.8595	34.1535	63.3386	36.964
FBgn0003124	polo	41.767	0	9.41543	1.25479	13.1093
FBgn0003129	Poxm	8.299	4.88838	3.37629	3.2765	4.96004
FBgn0003130	Poxn	0.163775	0	0.140962	0.226005	0.132686
FBgn0003132	Pp1-13C	0.081898	0.498466	0.176931	0.655632	0.353232
FBgn0003134	Pp1alpha-96A	85.7278	222.462	214.814	231.278	188.57
FBgn0003137	Ppn	70.3514	30.4434	43.5934	28.9287	43.3292
FBgn0003139	PpV	30.1887	11.0985	9.94099	9.05687	15.0713
FBgn0003140	PpY-55A	0	0	0	0.0341762	0.00854405
FBgn0003141	pr	71.0051	26.5249	25.4978	22.5175	36.3863
FBgn0003145	prd	1.93768	0	0	0.0265049	0.491046
FBgn0003149	Prm	451.387	181.674	145.016	119.918	224.499
FBgn0003159	CG2841	33.5908	20.5995	28.281	15.3261	24.4493
FBgn0003162	Pu	97.3037	53.3239	34.9561	32.3447	54.4821
FBgn0003165	pum	24.9645	74.6939	78.207	103.025	70.2226
FBgn0003169	put	25.7069	7.8158	7.88954	7.25202	12.1661
FBgn0003174	pwn	0.250223	0.160205	0.465583	0.125679	0.250422
FBgn0003175	px	14.9815	13.0459	17.6385	15.8323	15.3745
FBgn0003187	qua	7.19803	0.262445	1.85609	0.682699	2.49982
FBgn0003189	r	5.66195	2.09283	4.53359	2.09725	3.5964
FBgn0003204	ras	31.887	8.25219	13.0868	10.3583	15.8961
FBgn0003205	Ras85D	44.6129	21.7696	18.7681	12.3618	24.3781
FBgn0003206	Ras64B	67.1909	43.4786	31.5703	23.5901	41.4575
FBgn0003209	raw	31.2816	18.0977	24.0144	21.9557	23.8374
FBgn0003210	rb	25.1881	44.2869	40.7897	70.4289	45.1734
FBgn0003218	rdgB	12.1768	14.6407	18.2264	15.4366	15.1201
FBgn0003227	rec	0.728833	0.38197	0.177041	0.201547	0.372348
FBgn0003231	ref(2)P	237.858	102.696	105.255	87.2553	133.266
FBgn0003248	Rh2	0	0	0	0.0258049	0.00645122
FBgn0003249	Rh3	0	0	0	0	0
FBgn0003250	Rh4	0.20995	0.236989	0.0654047	0.0523348	0.14117
FBgn0003254	rib	1.86853	1.04518	1.32869	0.763816	1.25155
FBgn0003255	rk	0.0336526	0.028859	0.0382601	0.0403078	0.0352699
FBgn0003256	rl	13.55	8.89946	10.5986	6.71094	9.93975
FBgn0003257	r-l	14.8952	2.81513	3.63307	1.64586	5.74731
FBgn0003261	Rm62	262.58	191.043	231.207	206.978	222.952
FBgn0003267	ro	0	0	0.025909	0	0.00647725
FBgn0003268	rod	3.00373	0.505044	0.730394	0.361327	1.15012
FBgn0003270	amos	4.22684	0	0	0	1.05671
FBgn0003274	RpLP2	1079.65	382.096	219.153	225.772	476.668
FBgn0003275	RpII18	58.4633	22.3753	24.0081	20.158	31.2512
FBgn0003277	RpII215	23.4404	9.01623	9.6974	6.6177	12.1929
FBgn0003278	RpI135	4.55636	1.5597	1.68357	1.00415	2.20094
FBgn0003279	RpL4	907.345	319.185	216.168	204.675	411.843
FBgn0003285	rst	3.72458	4.50669	6.50064	5.06444	4.94909
FBgn0003292	rt	4.78898	0.703935	1.73338	0.925916	2.03805
FBgn0003295	ru	2.83808	1.20704	1.26518	1.33258	1.66072
FBgn0003300	run	2.18715	0.0763096	0.0547313	0.0759928	0.598546
FBgn0003301	rut	13.9279	10.5799	13.252	10.2807	12.0101
FBgn0003302	rux	7.58313	2.89842	3.9626	2.95516	4.34983
FBgn0003308	ry	5.97639	2.49811	2.16581	2.54211	3.29561
FBgn0003310	S	11.1344	4.80791	5.84278	3.51452	6.3249
FBgn0003312	sad	1.51834	0.0958135	1.50766	0.68648	0.952073
FBgn0003313	sala	28.729	0	0	0	7.18225
FBgn0003317	sax	21.0306	7.54429	7.72043	6.55269	10.712
FBgn0003319	Sb	0.272473	1.03789	0.457695	0.784554	0.638153
FBgn0003321	sbr	37.4585	89.2742	133.571	166.617	106.73
FBgn0003326	sca	2.08222	2.4255	1.89217	2.60979	2.25242
FBgn0003330	Sce	13.153	3.46504	3.67046	3.40113	5.92241
FBgn0003334	Scm	21.1893	9.35402	8.79305	7.57468	11.7278
FBgn0003339	Scr	41.4448	36.4255	31.3897	28.9985	34.5646
FBgn0003345	sd	49.6485	284.796	294.346	387.569	254.09
FBgn0003346	RanGAP	25.0937	5.06692	5.81961	3.8128	9.94826
FBgn0003353	sei	7.78438	3.24643	6.93033	4.00906	5.49255
FBgn0003356	Jon99Cii	0.720165	0.0461743	0.114602	0.091425	0.243092
FBgn0003357	Jon99Ciii	1.0556	0	0.198674	0.19014	0.361104
FBgn0003358	Jon99Ci	0.144756	0.172674	0	0	0.0793575
FBgn0003360	sesB	1694.04	1006.11	633.833	452.283	946.567
FBgn0003366	sev	20.6161	11.0735	14.2462	10.4341	14.0925
FBgn0003371	sgg	87.0209	358.655	423.173	473.006	335.464
FBgn0003372	Sgs1	0.0464742	0.0319652	0.364157	0.0956302	0.134557
FBgn0003373	Sgs3	0	0	0	0.0331531	0.00828827
FBgn0003374	Sgs4	0	0.202651	0.201231	0.522183	0.231516
FBgn0003375	Sgs5	0	0	0	0	0
FBgn0003377	Sgs7	0	0	0	0.252875	0.0632188
FBgn0003378	Sgs8	0	0	0	0	0
FBgn0003380	Sh	21.9339	234.456	242.585	246.447	186.355
FBgn0003382	sha	0.0861804	0	0.0349683	0.0947681	0.0539792
FBgn0003386	Shaw	5.21592	12.8714	15.6619	12.0082	11.4394
FBgn0003388	shd	0.219898	0	0.0697456	0.0118261	0.0753674
FBgn0003390	shf	2.9876	1.42712	1.91644	1.65426	1.99635
FBgn0003391	shg	24.1041	11.4459	8.38086	9.5096	13.3601
FBgn0003392	shi	53.7094	62.1248	76.235	74.5515	66.6552
FBgn0003396	shn	13.2438	11.8303	13.2792	12.2485	12.6505
FBgn0003401	shu	2.61639	0.0605603	0.86931	0.120504	0.916691
FBgn0003410	sina	16.8246	19.0027	18.6227	22.7195	19.2924
FBgn0003411	sisA	3.10473	0	0	0	0.776182
FBgn0003415	skd	13.7421	7.98169	9.48429	7.25864	9.61668
FBgn0003416	sl	5.09839	1.46415	1.56178	1.17191	2.32406
FBgn0003423	slgA	149.587	103.241	124.117	99.6275	119.143
FBgn0003429	slo	34.6602	96.7119	129.246	112.053	93.1678
FBgn0003430	slp1	10.3631	5.18222	7.82572	6.20624	7.39432
FBgn0003435	sm	30.1536	31.6004	29.0597	29.6177	30.1079
FBgn0003444	smo	9.14482	2.27417	1.61691	1.64012	3.669
FBgn0003447	sn	11.283	4.31432	16.9072	7.44229	9.9867
FBgn0003448	sna	3.58092	0	0.0340331	0.0204422	0.908849
FBgn0003449	snf	67.2228	22.2144	23.2401	15.3076	31.9962
FBgn0003450	snk	0.544671	0	0.353778	0.0249724	0.230855
FBgn0003459	stwl	10.0679	4.19826	5.36593	2.18158	5.45342
FBgn0003460	so	7.06021	3.2625	3.55872	2.97353	4.21374
FBgn0003462	Sod1	996.536	704.948	445.524	379.965	631.743
FBgn0003463	sog	51.0127	338.813	352.83	474.863	304.38
FBgn0003464	sol	15.214	5.88041	10.2705	6.15097	9.37897
FBgn0003475	spir	21.983	13.2397	14.3637	13.3722	15.7397
FBgn0003479	spn-A	12.8896	5.78152	9.29411	4.09849	8.01593
FBgn0003480	spn-B	3.1741	0.255432	0.528726	0.456971	1.10381
FBgn0003482	spn-D	0.787684	0	0.243839	0	0.257881
FBgn0003483	spn-E	5.46089	0	0.98078	0.193451	1.65878
FBgn0003486	spo	3.45779	0	0.401249	0	0.96476
FBgn0003495	spz	79.7019	446.964	527.355	558.299	403.08
FBgn0003499	sr	4.64227	3.36432	2.58464	3.95697	3.63705
FBgn0003502	Btk29A	31.2816	25.4595	28.0033	18.2955	25.76
FBgn0003507	srp	4.05231	0.998269	2.08085	1.00627	2.03442
FBgn0003510	Sry-alpha	16.5491	9.24693e-06	0.0012646	0.307138	4.21438
FBgn0003511	Sry-beta	14.3118	4.14323	2.76979	3.23559	6.1151
FBgn0003512	Sry-delta	18.5039	6.68492	3.32507	4.66256	8.29411
FBgn0003513	ss	25.9734	132.953	149.759	174.845	120.883
FBgn0003514	sqh	190.57	100.183	112.019	65.5218	117.073
FBgn0003515	st	0	0	0.153663	0	0.0384157
FBgn0003517	sta	1206.52	482.026	309.542	323.773	580.465
FBgn0003520	stau	39.7732	71.2391	84.5589	102.479	74.5125
FBgn0003525	stg	24.544	2.42679	67.2717	10.7349	26.2443
FBgn0003527	stil	1.84003	0	0.206872	0.124057	0.54274
FBgn0003545	sub	10.8235	0	0.84237	0.14022	2.95152
FBgn0003557	Su(dx)	33.4106	14.8788	13.1831	11.376	18.2121
FBgn0003559	su(f)	13.4457	4.77966	8.21135	5.38983	7.95664
FBgn0003567	su(Hw)	24.0541	7.05785	7.44832	5.98729	11.1369
FBgn0003575	su(sable)	19.2625	9.34027	9.24837	6.71689	11.142
FBgn0003598	Su(var)3-7	21.1666	4.22246	5.43861	3.57845	8.60153
FBgn0003607	Su(var)205	94.5123	22.3664	28.9481	19.2126	41.2599
FBgn0003612	Su(var)2-10	46.0937	11.9827	19.7541	13.0775	22.727
FBgn0003638	su(w[a])	49.0747	20.1687	51.0277	23.013	35.821
FBgn0003651	svp	12.3466	28.7358	26.7869	39.3419	26.8028
FBgn0003654	sw	13.9059	8.22927	11.5137	5.57454	9.80585
FBgn0003655	swa	22.4349	0.198253	5.50086	0.921117	7.26378
FBgn0003656	sws	38.3055	22.4412	28.2663	17.8339	26.7117
FBgn0003660	Syb	175.974	106.246	95.7034	77.7294	113.913
FBgn0003676	CCT1	52.5187	15.7645	17.1337	12.0585	24.3689
FBgn0003683	term	10.2266	0	0	0	2.55665
FBgn0003687	Tbp	13.3039	4.86626	4.95731	3.39322	6.63017
FBgn0003701	thr	7.08681	0	0.663171	0.258671	2.00216
FBgn0003710	tipE	22.91	14.308	12.974	11.1902	15.3456
FBgn0003714	tko	42.5205	12.4414	10.6043	12.3988	19.4912
FBgn0003716	tkv	30.9376	14.516	12.6522	11.9689	17.5187
FBgn0003719	tld	2.53537	0	0.0314619	0.00946483	0.644074
FBgn0003720	tll	2.08149	0	0	0	0.520373
FBgn0003721	Tm1	1011.94	512.595	477.267	369.833	592.909
FBgn0003731	Egfr	17.2549	7.44314	6.84248	7.90137	9.86047
FBgn0003733	tor	6.22964	0.0514297	1.34838	0.163258	1.94818
FBgn0003741	tra	21.5585	8.67653	11.2443	8.65916	12.5346
FBgn0003742	tra2	13.8047	3.75158	4.88646	3.58343	6.50654
FBgn0003744	trc	35.2227	20.8585	17.0036	13.0959	21.5452
FBgn0003747	Gr5a	0.749341	0.655717	0.930786	0.302704	0.659637
FBgn0003748	Treh	156.528	60.7801	71.3314	61.0342	87.4184
FBgn0003751	trk	0.599674	0.806189	1.33401	0.798336	0.884552
FBgn0003861	trp	0.406121	0.0991195	0.284322	0.129273	0.229709
FBgn0003862	trx	17.0504	12.9095	10.0711	9.32207	12.3383
FBgn0003863	alphaTry	9.08017	1.25058	6.47591	0.183413	4.24752
FBgn0003865	tsg	2.58018	0	0	0	0.645045
FBgn0003866	tsh	2.90204	1.23562	0.952631	0.995249	1.52139
FBgn0003867	tsl	21.4094	9.98402	10.351	9.61665	12.8403
FBgn0003870	ttk	29.1135	21.3049	17.285	12.4039	20.0268
FBgn0003882	tub	21.6334	6.9342	6.15745	5.27722	10.0006
FBgn0003884	alphaTub84B	984.08	427.925	252.451	240.216	476.168
FBgn0003885	alphaTub84D	86.499	29.5833	24.4742	20.4255	40.2455
FBgn0003886	alphaTub85E	10.8474	2.1755	1.59928	0.905179	3.88184
FBgn0003888	betaTub60D	9.50378	5.2929	4.6295	3.7733	5.79987
FBgn0003889	betaTub85D	0.0633106	0.110166	0.121652	0.0548216	0.0874875
FBgn0003890	betaTub97EF	62.8498	19.067	24.7585	21.5289	32.051
FBgn0003891	tud	65.6627	86.6272	113.369	129.25	98.7272
FBgn0003892	ptc	5.01212	1.72685	1.82239	1.39736	2.48968
FBgn0003896	tup	0.663616	0.510481	0.586453	0.506895	0.566861
FBgn0003900	twi	3.06683	0	0	0	0.766707
FBgn0003916	snRNA:U1:21D	8.63531	74.7045	42.0369	21.3995	36.6941
FBgn0003920	snRNA:U2:14B	0	0	0	0	0
FBgn0003922	snRNA:U2:38ABa	4.78727	0	0	1.32218	1.52736
FBgn0003923	snRNA:U2:38ABb	0.974729	0	0	0	0.243682
FBgn0003926	snRNA:U3	0	0	0	0	0
FBgn0003930	snRNA:U4:39B	0	180.368	30.5988	32.0734	60.76
FBgn0003931	snRNA:U4:38AB	0	0	0	0	0
FBgn0003933	snRNA:U5:14B	0	0	0	0	0
FBgn0003934	snRNA:U5:23D	0	0	0	0	0
FBgn0003935	snRNA:U5:34A	0	0	0	0	0
FBgn0003936	snRNA:U5:35D	0	0	0	0	0
FBgn0003938	snRNA:U5:63BC	0	0	0	0	0
FBgn0003941	RpL40	1221.47	481.987	330.322	329.866	590.911
FBgn0003942	RpS27A	1567	585.457	433.357	393.081	744.724
FBgn0003943	Ubi-p63E	134.761	47.9186	34.4534	39.8848	64.2544
FBgn0003944	Ubx	0.0813944	0.638375	0.332331	0.796783	0.462221
FBgn0003950	unc	0.0983812	0	0.0350027	0.0140447	0.0368571
FBgn0003961	Uro	0	0	0.118062	0.0283314	0.0365984
FBgn0003963	ush	5.03134	2.93535	4.19871	1.97504	3.53511
FBgn0003964	usp	25.9216	11.4862	11.8156	8.12038	14.3359
FBgn0003965	v	0.124667	0	0.136088	0.0816566	0.0856029
FBgn0003969	vap	19.7486	9.32395	10.389	8.95283	12.1036
FBgn0003975	vg	0.010674	0	0	0.00916223	0.00495906
FBgn0003977	vir	7.58438	3.05215	2.09589	2.70809	3.86013
FBgn0003978	vls	11.4186	2.64525	3.97368	2.14052	5.04451
FBgn0003979	Vm26Aa	105.629	0.631504	211.515	4.21805	80.4984
FBgn0003980	Vm26Ab	54.1331	1.0936	118.109	2.80065	44.0341
FBgn0003983	Vm34Ca	104.211	1.08252	556.123	7.83581	167.313
FBgn0003984	vn	5.52991	7.43449	6.83012	9.98165	7.44404
FBgn0003996	w	0.5325	0.195566	0.914116	0.389604	0.507946
FBgn0003997	hid	6.79061	27.111	26.3924	33.5786	23.4682
FBgn0004003	wbl	24.2381	10.0783	10.2153	9.06166	13.3983
FBgn0004034	y	0.169783	0.016376	0	0	0.0465397
FBgn0004045	Yp1	64.2875	8.4835	73.6991	6.48689	38.2392
FBgn0004047	Yp3	61.0843	13.2991	73.4534	10.0748	39.4779
FBgn0004049	yrt	20.2536	11.4212	19.2093	14.1225	16.2516
FBgn0004050	z	20.2718	11.427	12.8984	7.71512	13.0781
FBgn0004052	Z600	31.4948	0	0	0	7.8737
FBgn0004053	zen	2.87091	0	0	0	0.717727
FBgn0004054	zen2	1.20797	0	0	0	0.301992
FBgn0004055	uzip	68.5606	38.4569	30.4268	23.6271	40.2678
FBgn0004057	Zw	69.6183	27.6126	22.7087	24.4615	36.1003
FBgn0004066	Prosalpha4	120.269	39.3732	27.268	28.879	53.9473
FBgn0004087	Dhfr	30.902	11.2338	13.5942	8.90214	16.158
FBgn0004101	bs	13.2479	4.88054	5.62111	4.59833	7.08697
FBgn0004102	oc	0.702828	0.190962	0.116624	0.15525	0.291416
FBgn0004103	Pp1-87B	134.237	71.538	60.947	42.2022	77.231
FBgn0004106	Cdk1	31.4543	0.723408	4.87558	0.786131	9.45985
FBgn0004107	Cdk2	19.0867	1.09642	6.30351	1.53805	7.00617
FBgn0004108	Nrt	51.1324	10.2864	8.48536	7.67562	19.3949
FBgn0004110	tin	0.0708667	0	0.0511905	0	0.0305143
FBgn0004117	Tm2	1100.64	393.881	325.805	255.218	518.886
FBgn0004118	nAChRbeta2	0.265948	0.0712093	0.338783	0.0177179	0.173415
FBgn0004132	boca	57.8705	27.7464	23.4471	19.3065	32.0926
FBgn0004133	blow	7.60963	3.36586	3.53063	2.84265	4.33719
FBgn0004143	nullo	2.68658	0	0	0	0.671645
FBgn0004167	kst	28.2079	14.8589	19.2681	14.7851	19.28
FBgn0004168	5-HT1A	0.912375	1.24877	1.60613	2.24977	1.50426
FBgn0004169	up	2026.62	3217.75	3779.83	3631.89	3164.02
FBgn0004170	sc	1.28199	0	0.0202156	0	0.325551
FBgn0004171	Mst98Cb	0	0	0.0290479	0	0.00726198
FBgn0004172	Mst84Da	0	0	0	0	0
FBgn0004173	Mst84Db	0	0	0	0	0
FBgn0004174	Mst84Dc	0	0	0	0	0
FBgn0004175	Mst84Dd	0	0	0	0	0
FBgn0004177	mts	188.812	1052.64	1200.62	1215.94	914.503
FBgn0004179	Csp	79.245	43.1912	44.2168	26.808	48.3653
FBgn0004181	Ebp	0	0	0	0	0
FBgn0004183	snRNA:U1:82Eb	0	0	0	0	0
FBgn0004185	snRNA:U1:95Ca	6.90825	70.9693	24.0211	26.7493	32.162
FBgn0004186	snRNA:U1:95Cb	15.5436	56.0284	30.0263	40.124	35.4306
FBgn0004187	snRNA:U1:95Cc	1.72706	37.3522	3.00263	5.34987	11.8579
FBgn0004188	snRNA:U6:96Aa	18.8517	0	0	0	4.71293
FBgn0004189	snRNA:U6:96Ab	37.7035	0	0	0	9.42587
FBgn0004190	snRNA:U6:96Ac	0	0	0	0	0
FBgn0004191	snRNA:U2:34ABa	0	0	0	0	0
FBgn0004192	snRNA:U2:34ABb	8.61709	3.1946	7.73712	2.64435	5.54829
FBgn0004197	Ser	0.55353	0.240151	0.351632	0.300808	0.36153
FBgn0004198	ct	9.15965	79.9414	81.1504	90.3985	65.1625
FBgn0004227	nonA	49.3613	36.2426	42.84	47.2436	43.9219
FBgn0004228	mex1	0.250219	0	0.187924	0	0.109536
FBgn0004237	Hrb87F	91.3028	41.0005	53.4483	42.3632	57.0287
FBgn0004240	DptA	2.22243	0.957034	0.52666	0.936495	1.16065
FBgn0004242	Syt1	20.4941	22.1367	35.5072	20.2742	24.6031
FBgn0004244	Rdl	20.605	194.574	203.405	255.19	168.444
FBgn0004359	T48	18.4607	8.86962	8.76784	8.32872	11.1067
FBgn0004360	Wnt2	6.26515	3.07391	3.25136	2.99515	3.89639
FBgn0004362	HmgD	192.255	39.6182	72.2991	28.4762	83.1621
FBgn0004363	porin	832.181	449.195	399.964	291.155	493.124
FBgn0004364	18w	10.6815	4.80905	4.26026	3.90001	5.9127
FBgn0004367	mei-41	1.23916	0.240808	0.463466	0.279093	0.555632
FBgn0004368	Ptp4E	21.8812	18.6343	25.6576	17.8199	20.9983
FBgn0004369	Ptp99A	14.1634	31.4432	30.844	35.0497	27.8751
FBgn0004370	Ptp10D	23.7153	15.8228	18.5475	9.80581	16.9729
FBgn0004372	aly	0	0	0	0.0190441	0.00476103
FBgn0004373	fwd	25.9757	12.3738	13.0474	9.23215	15.1573
FBgn0004374	neb	3.3276	0.229805	0.505277	0.405387	1.11702
FBgn0004378	Klp61F	4.54754	0.0326561	0.331441	0.195388	1.27676
FBgn0004379	Klp67A	7.2433	0.367002	1.21615	0.23276	2.2648
FBgn0004380	Klp64D	26.0204	12.7454	9.23286	8.81675	14.2039
FBgn0004381	Klp68D	16.4404	6.09217	4.06072	4.85394	7.86181
FBgn0004387	Klp98A	17.053	8.2771	9.03535	6.85735	10.3057
FBgn0004389	bnk	9.51261	0	0	0	2.37815
FBgn0004390	RasGAP1	11.5995	5.47217	6.3192	4.7818	7.04317
FBgn0004391	shtd	4.75439	1.51941	1.67345	1.23573	2.29574
FBgn0004394	pdm2	0.542556	0	0	0.0460624	0.147155
FBgn0004395	unk	12.9024	22.0938	18.7293	19.5305	18.314
FBgn0004396	CrebA	15.4629	57.9493	53.4752	58.2427	46.2825
FBgn0004397	Vinc	58.3322	22.6474	24.3895	20.7024	31.5179
FBgn0004400	rhi	4.74152	0.550877	1.80644	1.20534	2.07604
FBgn0004401	Pep	108.706	35.1379	42.9294	31.5985	54.593
FBgn0004403	RpS14a	454.15	122.207	80.5547	137.778	198.672
FBgn0004404	RpS14b	296.33	87.8715	46.4025	87.4559	129.515
FBgn0004406	tam	3.18475	0.534231	0.68534	0.618605	1.25573
FBgn0004407	DNApol-gamma35	16.9988	8.41741	4.83542	5.25965	8.87782
FBgn0004414	msopa	0	0	0	0	0
FBgn0004419	me31B	211.229	25.3898	75.5418	22.0983	83.5647
FBgn0004425	LysB	3.55708	0	1.27375	0.107784	1.23465
FBgn0004426	LysC	4.27563	0	0	0	1.06891
FBgn0004427	LysD	6.78791	1.01442	8.55772	0.33047	4.17263
FBgn0004428	LysE	0.877837	0	0.541359	0	0.354799
FBgn0004429	LysP	0	0	0	0	0
FBgn0004430	LysS	0	0	0	0.211035	0.0527588
FBgn0004431	LysX	0	0.599637	0	0.0841639	0.17095
FBgn0004432	Cyp1	674.574	647.924	561.811	572.149	614.115
FBgn0004435	Galphaq	8.95695	25.9696	27.0472	22.1784	21.038
FBgn0004436	Ubc6	113.389	45.2813	47.4552	29.3932	58.8797
FBgn0004449	Ten-m	12.8474	8.8582	9.46693	6.22794	9.35012
FBgn0004456	mew	10.7628	14.1873	13.8962	11.9188	12.6913
FBgn0004463	RpIII128	4.77759	2.24964	1.51343	1.73158	2.56806
FBgn0004465	Su(P)	27.4334	10.8263	9.23257	7.28999	13.6956
FBgn0004507	GlyP	454.975	165.763	135.362	96.1685	213.067
FBgn0004509	Fur1	34.0078	75.298	78.9794	70.0259	64.5778
FBgn0004510	Ets97D	9.06609	2.5621	4.87596	2.53195	4.75902
FBgn0004511	dy	0.0359859	0	0.0320333	0.069403	0.0343555
FBgn0004512	Mdr49	31.5793	12.8598	9.2059	9.14077	15.6964
FBgn0004513	Mdr65	10.6408	4.34765	3.96811	3.79678	5.68834
FBgn0004514	Oct-TyrR	1.571	0.878135	0.92013	0.746835	1.02903
FBgn0004516	Gad1	0.0220259	0	0.0176427	0.0106082	0.0125692
FBgn0004552	Akh	0.0986435	0	0.692185	0.0913654	0.220548
FBgn0004554	Edg91	1.55074	0.632705	0.820554	0.177309	0.795327
FBgn0004556	Dbp73D	6.71965	2.45527	2.60415	1.25242	3.25787
FBgn0004567	slp2	1.63429	0.658393	0.673013	0.962793	0.982122
FBgn0004569	aos	41.7706	23.9189	19.7106	18.4169	25.9543
FBgn0004573	5-HT7	0.70797	0.573037	0.521118	0.591099	0.598306
FBgn0004574	Rop	73.0776	30.1998	27.409	24.4266	38.7782
FBgn0004575	Syn	8.24928	5.77367	8.95765	4.69507	6.91892
FBgn0004577	Pxd	0	0.014807	0	0	0.00370175
FBgn0004580	Cbp53E	25.3682	46.5924	39.5148	55.2445	41.68
FBgn0004581	bgcn	0.123733	0	0.0692187	0.0454339	0.0595964
FBgn0004583	ex	15.9025	8.69424	10.3008	7.65681	10.6386
FBgn0004584	Rrp1	8.54185	1.5753	3.22392	1.02866	3.59243
FBgn0004587	B52	126.359	35.2199	66.04	35.1692	65.697
FBgn0004588	Eig71Ea	0	0	0	0	0
FBgn0004589	Eig71Eb	0	0	0	0	0
FBgn0004590	Eig71Ec	0	0	0	0	0
FBgn0004591	Eig71Ed	0	0	0	0	0
FBgn0004592	Eig71Ee	0	0	0	0	0
FBgn0004593	Eig71Ef	0	0	0	0	0
FBgn0004594	Eig71Eg	0	0	0	0	0
FBgn0004595	pros	12.7583	60.4885	56.9977	59.2377	47.3706
FBgn0004597	CycC	18.3723	4.96136	5.54685	4.12532	8.25146
FBgn0004598	Fur2	34.3032	12.7921	17.0218	10.92	18.7593
FBgn0004606	zfh1	6.56397	7.03386	8.54988	7.18359	7.33282
FBgn0004607	zfh2	5.06009	4.44377	3.72509	3.58229	4.20281
FBgn0004611	Plc21C	13.4622	6.0942	10.9894	5.42804	8.99346
FBgn0004618	gl	0	0	0	0	0
FBgn0004619	GluRIA	0.00965341	0.0249077	0	0	0.00864028
FBgn0004620	GluRIIA	3.25006	1.13972	1.30238	1.29288	1.74626
FBgn0004622	TkR99D	0.247099	0.0561295	0.0278994	0.0335263	0.0911636
FBgn0004623	Gbeta76C	0	0	0	0	0
FBgn0004629	Cys	2285.58	2789.24	2379.27	1779.41	2308.38
FBgn0004635	rho	6.88723	14.0532	15.2633	19.5265	13.9326
FBgn0004636	Rap1	62.4336	248.871	268.095	284.677	216.019
FBgn0004638	drk	56.7652	25.6512	22.141	18.6023	30.7899
FBgn0004643	Zw10	12.5534	3.54098	4.33159	2.6302	5.76404
FBgn0004644	hh	0.048011	0	0.160643	0	0.0521635
FBgn0004646	ogre	55.8029	73.0421	72.7419	53.4757	63.7657
FBgn0004647	N	11.6833	25.1268	32.9182	33.0237	25.688
FBgn0004648	svr	33.3605	19.6625	21.8542	13.5196	22.0992
FBgn0004649	yl	24.0976	0.0295508	23.5089	1.35871	12.2487
FBgn0004650	fs(1)N	4.04514	0	1.9463	0.210519	1.55049
FBgn0004652	fru	18.0488	50.5167	55.384	73.7922	49.4354
FBgn0004654	Pgd	176.855	81.6173	53.2608	52.4136	91.0367
FBgn0004655	wapl	22.3014	5.25997	7.96113	4.6391	10.0404
FBgn0004656	fs(1)h	30.6983	129.544	150.732	170.631	120.401
FBgn0004657	mys	53.5609	32.6393	39.0442	33.8969	39.7853
FBgn0004666	sim	0	0	0.611952	0.0227903	0.158686
FBgn0004687	Mlc-c	105.947	61.659	39.7352	36.1272	60.8671
FBgn0004698	Xpc	27.5643	7.12795	11.7934	7.25724	13.4357
FBgn0004777	Ccp84Ag	0.0382438	0	0	0	0.00956095
FBgn0004778	Ccp84Af	0	0	0	0	0
FBgn0004779	Ccp84Ae	0	0	0	0.0547877	0.0136969
FBgn0004780	Ccp84Ad	0.063232	0	0	0	0.015808
FBgn0004781	Ccp84Ac	0.438389	0.812949	1.52121	1.01686	0.947352
FBgn0004782	Ccp84Ab	0	0	0	0	0
FBgn0004783	Ccp84Aa	0	0	0	0	0
FBgn0004784	inaC	0	0	0.0926121	0	0.023153
FBgn0004795	retn	22.8588	0.0631504	1.4358	0.448757	6.20163
FBgn0004797	mdy	13.8614	5.87321	7.91416	5.92589	8.39367
FBgn0004811	fs(2)ltoPP43	17.745	2.17304	4.26502	3.50705	6.92253
FBgn0004828	His3.3B	638.439	6825.86	5619.2	5843.15	4731.66
FBgn0004832	Xpac	8.92475	5.24092	4.98019	2.21687	5.34068
FBgn0004837	Su(H)	44.0058	26.3705	24.576	19.6207	28.6433
FBgn0004838	Hrb27C	183.785	556.848	639.286	572.987	488.226
FBgn0004839	otk	0.257476	0.0535815	0.0166469	0.0801742	0.10197
FBgn0004841	TkR86C	0.528066	0.109924	0.45513	0.404254	0.374344
FBgn0004842	RYa-R	0.0351374	0	0	0.0173687	0.0131265
FBgn0004852	Ac76E	16.559	7.41752	12.8388	6.83842	10.9134
FBgn0004854	B-H2	8.39524	10.2875	13.6621	16.0051	12.0875
FBgn0004855	RpII15	40.5933	16.2549	11.3766	10.9814	19.8015
FBgn0004856	Bx42	39.3579	13.2494	11.5678	8.88104	18.264
FBgn0004858	elB	39.8632	194.528	199.427	185.463	154.82
FBgn0004859	ci	6.92509	3.81054	2.82571	2.21756	3.94473
FBgn0004860	ph-d	5.14646	3.2473	4.11538	3.11975	3.90722
FBgn0004861	ph-p	8.86905	8.74836	8.90962	9.00536	8.8831
FBgn0004862	bap	0	0	0.120213	0.0240554	0.0360671
FBgn0004863	C15	0.878411	0.291089	0.647906	0.561328	0.594684
FBgn0004864	hop	15.3024	5.70408	7.6439	4.0847	8.18377
FBgn0004865	Eip78C	0.921143	0.891223	1.02555	1.12735	0.991316
FBgn0004867	RpS2	828.449	275.254	202.074	186.789	373.142
FBgn0004868	Gdi	177.022	173.348	191.112	150.713	173.049
FBgn0004870	bab1	0.865742	0.56102	0.600725	1.02031	0.761949
FBgn0004872	piwi	7.50156	0.097545	1.44564	0.237659	2.3206
FBgn0004875	enc	20.9154	21.7556	24.8612	24.8385	23.0927
FBgn0004876	cdi	13.543	9.68095	9.15198	9.36136	10.4343
FBgn0004878	cas	0.0789001	0	0.0658161	0	0.0361791
FBgn0004880	scrt	15.7887	182.95	164.321	236.651	149.928
FBgn0004882	orb	7.57822	0.183472	3.97011	0.457065	3.04722
FBgn0004885	tok	0.811092	0.0177912	0.299789	0.173486	0.32554
FBgn0004888	Scsalpha1	241.802	112.148	87.1963	71.0955	128.06
FBgn0004889	tws	62.5969	32.9732	39.3292	19.6342	38.6334
FBgn0004892	sob	1.54256	1.04652	1.13526	0.782048	1.1266
FBgn0004893	bowl	12.6192	7.14494	6.9676	7.18052	8.47806
FBgn0004895	FoxL1	0	0	0	0	0
FBgn0004896	fd59A	0.0171138	0.0296596	0	0	0.0116933
FBgn0004897	fd96Ca	1.31208	0.766014	0.54871	0.699618	0.831605
FBgn0004898	fd96Cb	3.9782	4.3448	4.33239	2.9533	3.90217
FBgn0004901	Prat	11.0563	3.25383	3.75481	2.1862	5.06278
FBgn0004903	Rb97D	15.9579	11.3292	15.104	8.14809	12.6348
FBgn0004907	14-3-3zeta	501.977	307.558	318.543	197.369	331.362
FBgn0004908	Arl2	17.773	4.60887	6.89128	5.88051	8.78842
FBgn0004910	Eip63F-1	68.8929	49.4958	53.0093	42.5264	53.4811
FBgn0004911	asRNA:Eig63F-2	2.17746	0.760634	0.746333	0.979495	1.16598
FBgn0004913	Gnf1	19.5183	5.72445	9.27023	4.8365	9.83737
FBgn0004914	Hnf4	73.3295	41.9739	38.4159	33.6384	46.8394
FBgn0004915	TfIIB	34.2913	15.1672	11.4617	9.9102	17.7076
FBgn0004919	gol	6.40944	5.11694	6.20685	4.37037	5.5259
FBgn0004921	Ggamma1	241.714	188.197	150.723	110.823	172.864
FBgn0004924	Top1	64.3235	45.1134	54.9731	64.7365	57.2866
FBgn0004926	eIF2beta	111.716	98.8854	101.265	126.231	109.524
FBgn0004956	upd1	0.926887	0.0535914	0.0713211	0.0490209	0.275205
FBgn0004957	por	4.2049	1.22469	1.46781	0.964376	1.96544
FBgn0004959	phm	1.13879	0.150775	0.0555015	0.0333558	0.344606
FBgn0005198	gig	12.574	6.08145	8.70444	5.21155	8.14286
FBgn0005278	Sam-S	88.855	25.745	29.6616	17.9155	40.5443
FBgn0005322	nmd	56.5409	24.0846	18.7525	14.9294	28.5769
FBgn0005355	Su(fu)	26.3914	6.31305	8.48624	5.67708	11.7169
FBgn0005386	ash1	10.2184	4.7404	4.64816	3.27893	5.72147
FBgn0005390	fs(1)M3	1.97768	0.0817691	1.55836	0.255625	0.968359
FBgn0005391	Yp2	76.5255	5.13635	81.906	7.66229	42.8075
FBgn0005411	U2af50	71.0939	23.8775	24.9063	17.6664	34.386
FBgn0005427	ewg	17.2208	10.2587	14.7164	8.57212	12.692
FBgn0005533	RpS17	1598.37	514.645	305.894	403.514	705.606
FBgn0005536	Mbs	89.0441	62.6478	71.491	67.465	72.662
FBgn0005558	ey	0.193948	0.113105	0.0655873	0.0450839	0.104431
FBgn0005561	sv	15.1213	9.30047	16.1751	9.12066	12.4294
FBgn0005564	Shal	5.53326	2.71851	2.89833	2.20161	3.33793
FBgn0005585	Calr	482.365	231.282	190.748	141.425	261.455
FBgn0005586	Rab3	14.269	10.3746	8.41569	6.23892	9.82455
FBgn0005590	scw	3.83205	0.132478	0	0	0.991132
FBgn0005593	RpL7	1139.58	374.32	255.576	240.399	502.469
FBgn0005596	yem	9.28035	1.64664	3.13424	1.94556	4.0017
FBgn0005612	Sox14	16.338	9.42863	7.97134	7.85072	10.3972
FBgn0005613	Sox15	15.3253	9.32968	9.80969	8.13329	10.6495
FBgn0005614	trpl	2.00938	1.02863	1.81627	1.38722	1.56038
FBgn0005616	msl-2	6.14449	6.2853	10.8182	9.16253	8.10263
FBgn0005617	msl-1	19.5737	4.48345	4.9859	3.34467	8.09693
FBgn0005619	Hdc	57.3914	24.9446	47.3264	26.8539	39.1291
FBgn0005624	Psc	5.62232	5.92808	8.78533	8.01837	7.08852
FBgn0005626	ple	506.235	374.527	332.297	250.654	365.928
FBgn0005631	robo1	4.86315	2.99552	3.50717	2.55672	3.48064
FBgn0005632	faf	30.3679	14.3962	22.9705	14.6629	20.5994
FBgn0005633	fln	0.41359	0.146951	0	0	0.140135
FBgn0005636	nvy	1.99721	1.07692	1.109	1.03798	1.30528
FBgn0005638	slbo	2.04555	0.406361	0.616629	0.666826	0.933841
FBgn0005640	Eip63E	14.5322	5.80872	8.46734	6.23752	8.76145
FBgn0005642	wdn	18.9335	4.93629	7.04635	5.13114	9.01182
FBgn0005648	Pabp2	30.7641	191.505	235.922	199.279	164.368
FBgn0005649	Rox8	64.7664	55.1668	83.958	37.5018	60.3483
FBgn0005654	Orc3	4.48448	0.297433	1.2319	0.296296	1.57753
FBgn0005655	PCNA	42.7179	0.190976	12.3918	1.7042	14.2512
FBgn0005658	Ets65A	4.61919	3.39655	2.94934	1.88054	3.2114
FBgn0005659	Ets98B	39.9458	27.5388	39.5537	30.8711	34.4774
FBgn0005660	Ets21C	4.22284	1.42075	2.18481	1.41564	2.31101
FBgn0005664	Crys	0	0	0	0	0
FBgn0005666	bt	143.47	139.184	141.518	121.141	136.328
FBgn0005670	Cyp4d1	0.0718355	0	0.121116	0.14549	0.0846104
FBgn0005671	Vha55	329.519	177.315	143.275	107.368	189.369
FBgn0005672	spi	44.8716	22.4963	35.2185	19.6704	30.5642
FBgn0005674	GluProRS	20.0162	8.37528	7.51092	6.41635	10.5797
FBgn0005677	dac	19.6745	13.8057	13.1781	13.4748	15.0333
FBgn0005683	pie	3.17248	0.133571	1.16164	0.19947	1.16679
FBgn0005694	Aef1	25.8161	12.3001	10.5793	7.06567	13.9403
FBgn0005695	gcl	22.0149	4.03504	6.59698	3.86113	9.12701
FBgn0005696	DNApol-alpha73	6.30017	0.661257	1.97706	0.385406	2.33097
FBgn0005771	noc	41.5017	125.458	143.627	170.001	120.147
FBgn0005775	Con	7.94029	77.252	68.9769	92.4332	61.6506
FBgn0005777	PpD3	28.6184	9.83047	11.6126	5.92368	13.9963
FBgn0005778	PpD5	0	0	0	0	0
FBgn0005779	PpD6	0	0	0	0	0
FBgn0008635	betaCOP	42.7411	17.5418	19.9288	14.997	23.8022
FBgn0008636	hbn	0.303306	0.0942997	0	0	0.0994014
FBgn0008646	E5	4.24138	2.59864	2.94336	2.32265	3.02651
FBgn0008651	lbl	19.7275	9.90766	9.36248	7.26504	11.5657
FBgn0010014	CanB	20.1167	179.782	158.864	187.522	136.571
FBgn0010015	CanA1	8.80655	3.29589	5.03305	3.02777	5.04082
FBgn0010019	Cyp4g1	12.0725	0	0.311487	0.316918	3.17523
FBgn0010038	GstD2	11.5924	6.10325	6.23744	4.26591	7.04975
FBgn0010039	GstD3	39.7426	15.5319	15.8232	11.0655	20.5408
FBgn0010040	GstD4	0.193183	0.351572	0.145361	0.0578728	0.186997
FBgn0010041	GstD5	0.956836	0.382412	0.27681	0.189235	0.451323
FBgn0010042	GstD6	0.29241	0	0.262443	0.156866	0.17793
FBgn0010043	GstD7	0.0609228	0	0	0.109174	0.0425242
FBgn0010044	GstD8	29.2761	17.5337	15.1703	15.5502	19.3826
FBgn0010051	Itp-r83A	24.2297	14.6244	20.2581	13.1506	18.0657
FBgn0010052	Jhe	30.7674	10.9463	9.74761	10.2822	15.4359
FBgn0010053	Jheh1	176.608	75.5979	51.3738	45.8982	87.3695
FBgn0010078	RpL23	2291.71	1104.93	718.504	578.702	1173.46
FBgn0010097	gammaTub37C	7.2677	0	10.45	0.295543	4.50331
FBgn0010100	mAcon1	1181.43	431.78	284.757	258.438	539.101
FBgn0010105	comm	7.41853	3.75501	2.95724	3.73716	4.46699
FBgn0010109	dpn	2.11514	0	0	0	0.528785
FBgn0010113	hdc	15.6707	65.0146	69.929	120.463	67.7693
FBgn0010114	hig	4.54442	2.35616	4.92455	3.01609	3.7103
FBgn0010173	RpA-70	47.7073	14.8643	20.9148	12.0148	23.8753
FBgn0010194	Wnt5	3.42765	1.83109	2.62581	2.932	2.70414
FBgn0010197	Gyc32E	0.0295472	0	0	0.0168913	0.0116096
FBgn0010198	RpS15Aa	887.446	316.626	228.633	188.572	405.319
FBgn0010213	Sod2	214.613	94.057	57.5553	51.9785	104.551
FBgn0010215	alpha-Cat	36.1322	18.3923	22.0491	15.7145	23.072
FBgn0010217	ATPsynbeta	2066.76	719.256	463.801	465.028	928.711
FBgn0010220	Dbp45A	15.3396	6.11493	5.25089	4.77691	7.87058
FBgn0010222	Nmdmc	11.6769	6.63121	5.00545	3.51643	6.7075
FBgn0010223	Galphaf	0.319634	0.148348	0.0767881	0.0738197	0.154647
FBgn0010225	Gel	89.4078	37.0622	36.3687	29.8652	48.176
FBgn0010226	GstS1	69.2906	10.403	13.5911	8.4685	25.4383
FBgn0010228	HmgZ	258.953	1673.89	1689.05	1721.69	1335.9
FBgn0010235	Klc	59.3692	25.9987	32.8834	20.9524	34.8009
FBgn0010238	Lac	126.541	199.388	252.199	139.788	179.479
FBgn0010240	Lcch3	0.183093	0	0.0732408	0.052814	0.0772869
FBgn0010241	Mdr50	0.0773719	0	0.0917959	0	0.0422919
FBgn0010246	Myo61F	2.3517	1.44797	1.58174	1.08407	1.61637
FBgn0010247	Parp	8.1156	4.88385	5.62522	4.43682	5.76537
FBgn0010258	Rbp4	0.0262606	0.0229679	0.095093	0.0456777	0.0474998
FBgn0010263	Rbp9	138.53	97.0047	89.912	67.7495	98.299
FBgn0010265	RpS13	1317.99	647.937	414.786	302.476	670.797
FBgn0010269	Dsor1	24.2632	8.82255	15.019	7.61903	13.9309
FBgn0010278	Ssrp	23.1941	33.1202	55.4433	55.1069	41.7161
FBgn0010280	Taf4	30.1941	14.8298	22.3013	13.7319	20.2643
FBgn0010282	TfIIFalpha	47.2941	63.9188	84.7838	91.8116	71.9521
FBgn0010287	Trf	3.62542	0.738961	0.579338	0.462684	1.3516
FBgn0010288	Uch	58.6966	20.1038	31.0111	14.0812	30.9732
FBgn0010292	bys	18.3936	4.85797	6.50836	4.19271	8.48816
FBgn0010294	ng2	0	0	0	0	0
FBgn0010295	ng3	0	0	0	0	0
FBgn0010296	ng4	0	0	0	0	0
FBgn0010300	brat	15.4773	10.068	15.8352	12.3772	13.4394
FBgn0010303	hep	20.1578	91.5928	106.287	125.907	85.9861
FBgn0010309	pigeon	3.3342	0.602604	1.53891	1.05122	1.63173
FBgn0010313	corto	23.7745	17.3611	14.785	13.3352	17.3139
FBgn0010314	Cks30A	5.25833	0	2.8116	0.413511	2.12086
FBgn0010315	CycD	17.7597	3.7205	8.93073	2.49966	8.22765
FBgn0010316	dap	12.3783	5.68652	3.56764	3.41727	6.26243
FBgn0010317	CycJ	2.32284	0.118206	0.626418	0.165437	0.808225
FBgn0010323	Gsc	0.106422	0	0	0	0.0266055
FBgn0010328	woc	30.3375	11.9467	15.6556	9.83271	16.9431
FBgn0010329	Tbh	0.204895	0.00839247	0.278132	0.108792	0.150053
FBgn0010333	Rac1	49.5534	60.086	64.349	63.982	59.4926
FBgn0010339	128up	27.3265	7.32139	7.12845	6.04811	11.9561
FBgn0010340	140up	18.2093	7.57127	7.5626	5.7829	9.78152
FBgn0010341	Cdc42	89.7064	97.8875	121.293	91.7112	100.15
FBgn0010342	Map60	39.494	2.98738	6.58734	2.91729	12.9965
FBgn0010348	Arf79F	231.515	122.56	98.3366	69.8594	130.568
FBgn0010350	Cds	46.5403	24.4328	17.8525	16.0981	26.2309
FBgn0010352	Nc73EF	532.067	231.957	244.022	174.127	295.543
FBgn0010355	Taf1	18.033	6.86543	8.6014	6.42199	9.98046
FBgn0010356	Taf5	12.8338	2.96154	4.43413	3.47629	5.92644
FBgn0010357	betaTry	8.20341	0.349735	7.1085	0.0988534	3.94012
FBgn0010358	deltaTry	0.445542	0	0.12461	0	0.142538
FBgn0010359	gammaTry	0.222771	0	0.24922	0	0.117998
FBgn0010379	Akt1	23.5998	33.0203	42.9371	35.6567	33.8035
FBgn0010380	AP-1-2beta	44.4254	19.4766	16.7759	13.1939	23.4679
FBgn0010382	CycE	16.9278	0.283777	2.84289	0.992599	5.26177
FBgn0010383	Cyp18a1	4.18509	6.99547	12.8666	9.85737	8.47613
FBgn0010385	Def	21.414	30.7611	10.6159	15.7526	19.6359
FBgn0010387	Acbp2	805.869	498.218	334.409	219.822	464.58
FBgn0010388	Dro	31.973	25.7991	8.55853	16.388	20.6797
FBgn0010389	htl	10.6271	4.4199	3.8642	4.42766	5.83472
FBgn0010391	Gtp-bp	43.0286	15.3078	11.3896	12.1253	20.4628
FBgn0010395	Itgbn	0.157312	0.0104332	0.129651	0.0415977	0.0847485
FBgn0010397	LamC	44.7686	21.3416	25.1961	18.8306	27.5342
FBgn0010398	Lrr47	4.30407	1.21689	4.3547	1.81551	2.92279
FBgn0010399	Nmdar1	0.597191	0.0377335	0.60652	0.293532	0.383744
FBgn0010401	Os-C	44.6313	0	33.5109	8.04542	21.5469
FBgn0010403	Obp83b	46.8229	2.48311	36.12	6.74298	23.0422
FBgn0010406	RNaseX25	48.6237	20.0624	14.0871	13.3536	24.0317
FBgn0010407	Ror	0.854848	0.740497	0.853907	0.318148	0.69185
FBgn0010408	RpS9	959.217	264.152	194.847	190.853	402.267
FBgn0010409	RpL18A	1567.52	579.403	376.064	366.888	722.469
FBgn0010411	RpS18	1614.58	481.133	406.28	375.455	719.362
FBgn0010412	RpS19a	1334.69	435.494	470.047	345.272	646.376
FBgn0010414	SerT	10.7568	4.77936	5.49409	5.24644	6.56917
FBgn0010415	Sdc	73.5084	402.51	427.436	569.189	368.161
FBgn0010416	TH1	19.8506	7.15605	7.99902	5.56341	10.1423
FBgn0010417	Taf6	18.6467	6.87552	6.16487	4.76294	9.11251
FBgn0010421	TfIIFbeta	30.2458	9.72363	8.43181	7.25421	13.9139
FBgn0010422	TfIIS	29.9226	9.41585	7.54534	7.48126	13.5913
FBgn0010423	TpnC47D	0.250194	0.542131	0.0639952	0.152429	0.252187
FBgn0010424	TpnC73F	20.4562	21.089	39.3191	17.0444	24.4772
FBgn0010425	epsilonTry	11.2271	0	5.02336	0.192287	4.11069
FBgn0010431	mtrm	28.1481	0.102165	24.1282	2.83853	13.8042
FBgn0010433	ato	0.336194	0	0	0	0.0840485
FBgn0010434	cora	110.742	56.9858	80.7124	61.9652	77.6013
FBgn0010435	emp	890.099	481.54	411.335	324.415	526.847
FBgn0010438	mtSSB	35.6474	9.79928	15.4366	8.97971	17.4657
FBgn0010441	pll	15.494	4.70429	7.55342	5.247	8.24968
FBgn0010452	trn	5.06118	2.64373	2.30805	1.65319	2.91654
FBgn0010453	Wnt4	0.152549	0.891488	0.889729	1.28963	0.805849
FBgn0010470	Fkbp14	132.361	64.2076	46.9	44.7193	72.047
FBgn0010473	tutl	24.5811	138.021	197.045	148.709	127.089
FBgn0010482	l(2)01289	115.439	50.7091	67.9143	53.9669	72.0073
FBgn0010488	NAT1	122.628	475.817	592.37	539.4	432.554
FBgn0010497	dmGlut	12.4368	2.53825	3.93673	2.54201	5.36345
FBgn0010501	Dcp-1	10.9474	0.544954	1.88584	0.910215	3.5721
FBgn0010504	kermit	10.8316	5.07027	3.62549	3.55615	5.77088
FBgn0010516	wal	207.915	74.3735	60.1304	56.4576	99.7191
FBgn0010520	Bka	16.9385	6.76865	4.50561	3.64398	7.96419
FBgn0010531	Ccs	35.026	16.7505	16.1979	11.9083	19.9707
FBgn0010548	Aldh-III	467.928	214.891	273.615	171.421	281.964
FBgn0010549	l(2)03659	1.01918	0.836046	0.54263	0.418894	0.704187
FBgn0010551	Phb2	84.1681	22.2053	34.8547	24.9734	41.5504
FBgn0010583	dock	17.0671	6.73772	6.5315	5.8755	9.05296
FBgn0010590	Prosbeta1	154.167	65.7069	52.4575	43.8247	79.039
FBgn0010591	Sply	17.28	7.32141	8.28831	4.93288	9.45565
FBgn0010602	lwr	91.779	30.3119	24.3698	21.2347	41.9239
FBgn0010607	l(2)05714	14.8235	4.65048	3.8828	4.6016	6.98959
FBgn0010611	Hmgs	27.9764	13.226	13.3326	10.5172	16.263
FBgn0010612	ATPsynG	1303.72	526.862	351.847	295.096	619.381
FBgn0010620	CG10939	123.683	68.5178	57.1711	54.3288	75.9252
FBgn0010621	CCT5	56.2255	16.3483	16.2797	11.2325	25.0215
FBgn0010622	DCTN3-p24	17.3966	11.6928	8.14543	6.03878	10.8184
FBgn0010638	Sec61beta	91.6188	42.462	46.9433	31.1872	53.0528
FBgn0010651	MFS14	38.1493	122.337	109.857	153.515	105.965
FBgn0010660	Nup214	12.04	4.33784	6.9133	5.44443	7.18389
FBgn0010741	Pfdn2	74.6776	24.2875	21.1948	19.7718	34.9829
FBgn0010747	Srp54k	56.9221	18.7415	18.6822	14.2831	27.1572
FBgn0010750	atms	26.6932	7.60797	8.14638	6.30924	12.1892
FBgn0010762	simj	15.863	6.39666	10.5285	5.07234	9.46512
FBgn0010768	sqz	3.46109	1.26536	1.27586	1.17341	1.79393
FBgn0010770	ppan	13.218	2.22402	3.48721	1.95248	5.22043
FBgn0010772	Xe7	44.9346	17.0081	37.0307	20.1606	29.7835
FBgn0010774	Ref1	96.4819	22.1341	31.5421	21.647	42.9513
FBgn0010786	l(3)02640	110.229	48.7739	39.6111	37.7577	59.0929
FBgn0010803	TrpRS	20.3847	8.92843	8.97717	5.56435	10.9637
FBgn0010808	Chchd3	181.617	76.5115	56.1516	46.7891	90.2673
FBgn0010812	unc-45	20.251	9.41608	5.386	6.5007	10.3884
FBgn0010825	Gug	20.4475	10.7282	15.0778	12.1065	14.59
FBgn0010830	l(3)04053	14.1935	5.36369	7.09797	5.59416	8.06233
FBgn0010877	l(3)05822	27.7479	12.1589	11.8165	9.41091	15.2836
FBgn0010894	sinu	23.5592	16.2338	11.4812	9.62427	15.2246
FBgn0010905	Spn	16.0993	24.0783	29.2737	26.9702	24.1054
FBgn0010909	msn	27.9744	17.6349	24.7	19.6632	22.4931
FBgn0010926	l(3)07882	15.7038	2.88434	3.44239	2.63234	6.16572
FBgn0011016	SsRbeta	75.392	34.5851	33.3606	22.5145	41.463
FBgn0011020	Sas-4	4.98549	0.646155	1.77791	0.758917	2.04212
FBgn0011202	dia	13.9282	6.48634	5.48771	4.67052	7.64319
FBgn0011204	cue	43.7099	32.655	46.7791	42.3432	41.3718
FBgn0011205	fbl	108.991	56.8419	44.2848	37.1364	61.8135
FBgn0011206	bol	54.1424	464.961	440.638	549.625	377.342
FBgn0011207	pelo	15.7305	5.6118	5.89114	4.06059	7.82351
FBgn0011211	blw	1197.19	531.142	389.541	302.046	604.98
FBgn0011217	eff	160.853	64.1508	65.6557	50.2596	85.2298
FBgn0011224	heph	31.6845	53.1494	57.2224	68.6237	52.67
FBgn0011225	jar	32.7167	15.314	25.3141	13.8562	21.8003
FBgn0011227	ox	1103.29	719.125	418.755	285.311	631.62
FBgn0011230	poe	25.2397	12.9513	14.4266	13.852	16.6174
FBgn0011232	scat	15.3947	5.79464	4.92662	4.7449	7.71522
FBgn0011236	ken	16.2125	9.53504	8.25445	6.74254	10.1861
FBgn0011239	ms(2)35Ci	0	0	0	0	0
FBgn0011244	Hsp60B	0.0173254	0.120131	0.149258	0.239275	0.131497
FBgn0011259	Sema1a	3.23453	21.9797	21.3309	25.0167	17.8905
FBgn0011260	Sema2a	16.5661	3.61885	6.5759	3.53563	7.57412
FBgn0011270	Pglym87	0	0	0	0	0
FBgn0011272	RpL13	936.19	357.167	225.773	227.82	436.737
FBgn0011273	Acam	0	0	0	0	0
FBgn0011274	Dif	52.454	30.6585	31.7995	25.7142	35.1565
FBgn0011276	HLH3B	0.0561855	0	0	0	0.0140464
FBgn0011277	HLH4C	0	0	0	0	0
FBgn0011278	lbe	0.835687	1.20161	0.707521	1.09587	0.960172
FBgn0011279	Obp69a	2.78246	0	1.86491	0.709259	1.33916
FBgn0011280	Obp19d	7729.3	4950.35	4355.64	2872.38	4976.92
FBgn0011281	Obp83a	44.9359	1.29657	22.7824	5.57269	18.6469
FBgn0011282	Obp84a	6.41019	0.86732	2.64731	1.05267	2.74437
FBgn0011283	Obp28a	25.3355	2.74048	24.4928	7.83684	15.1014
FBgn0011284	RpS4	1280.87	446.487	318.316	276.869	580.635
FBgn0011286	RyR	49.251	29.8224	40.167	24.1702	35.8526
FBgn0011288	Snap25	19.172	13.9646	14.5569	9.56167	14.3138
FBgn0011289	TfIIA-L	67.3486	22.4018	25.3197	19.6696	33.6849
FBgn0011290	Taf12	54.2335	23.5777	24.1694	16.427	29.6019
FBgn0011291	Taf11	17.5741	2.33934	6.06839	5.62448	7.90158
FBgn0011293	a10	42.9182	0	16.7687	5.67518	16.3405
FBgn0011294	a5	8.89014	0	2.95149	0.789872	3.15788
FBgn0011296	l(2)efl	206.127	45.9381	47.5505	54.9238	88.6349
FBgn0011297	Alg3	6.69354	1.98506	2.70666	1.75556	3.2852
FBgn0011300	babo	14.1947	9.59325	14.2447	6.78346	11.204
FBgn0011305	Rsf1	46.3729	81.9929	90.6323	103.634	80.658
FBgn0011327	Uch-L5	29.9744	7.72927	17.0064	11.5605	16.5676
FBgn0011335	vers	17.621	4.60065	5.04769	4.09442	7.84094
FBgn0011336	Stt3B	62.2299	24.5714	18.9536	19.5351	31.3225
FBgn0011361	ND-ACP	276.443	116.273	99.2955	76.5687	142.145
FBgn0011455	ND-SGDH	488.363	185.98	128.725	134.481	234.387
FBgn0011474	PR-Set7	14.2605	5.48798	7.72295	3.00537	7.6192
FBgn0011476	l(3)neo43	36.678	15.2322	13.4046	8.89223	18.5518
FBgn0011481	Ssdp	33.677	81.4953	102.621	98.1381	78.9828
FBgn0011509	SrpRbeta	34.1606	13.5809	16.9008	8.19387	18.209
FBgn0011554	etaTry	0.0479877	0	0.390642	0	0.109657
FBgn0011555	thetaTry	3.80247	0	1.87179	0.0356088	1.42747
FBgn0011556	zetaTry	0.0457325	0.163229	0.0337674	0.0404404	0.0707923
FBgn0011559	Acp36DE	0	0	0	0	0
FBgn0011566	Smyd3	11.5	5.78971	3.30845	3.53355	6.03293
FBgn0011569	can	0.0631893	0	0.0180632	0.0651945	0.0366117
FBgn0011570	cpb	42.655	17.0918	15.1045	11.0168	21.467
FBgn0011573	Cdc37	43.8509	19.6124	21.5367	12.9771	24.4943
FBgn0011576	Cyp4d2	80.6154	29.004	19.8043	22.0267	37.8626
FBgn0011581	Ms	0	0	0	0	0
FBgn0011582	Dop1R1	0.294698	0.558315	0.448101	0.386186	0.421825
FBgn0011584	Trp1	129.278	101.349	82.0807	85.3316	99.5098
FBgn0011586	e(r)	70.0883	41.3602	44.0602	43.775	49.8209
FBgn0011589	Elk	0.140043	0.0540562	0.0497676	0.11984	0.0909267
FBgn0011591	fng	28.6087	17.6488	18.6865	12.2866	19.3077
FBgn0011592	fra	4.1004	2.01707	1.87358	1.24878	2.30996
FBgn0011596	fzo	1.33153	8.77989	7.09098	14.7315	7.98348
FBgn0011603	ine	54.2395	22.1498	32.3222	21.5446	32.564
FBgn0011604	Iswi	22.2493	3.54469	6.93283	3.9549	9.17043
FBgn0011606	Klp3A	5.86092	0.793635	2.20201	0.637451	2.3735
FBgn0011638	La	45.403	16.0704	19.9982	11.864	23.3339
FBgn0011640	lark	59.9551	22.0395	26.9673	18.0989	31.7652
FBgn0011642	Zyx	24.5785	11.1983	22.3602	10.6964	17.2083
FBgn0011648	Mad	22.0121	7.80588	7.80155	6.82638	11.1115
FBgn0011653	mas	0.584869	0	0	0	0.146217
FBgn0011655	Med	16.7954	11.4255	12.4976	12.4141	13.2831
FBgn0011656	Mef2	40.3854	18.7369	23.8084	15.6259	24.6392
FBgn0011659	Mlh1	3.2993	0.579051	1.11909	0.76874	1.44155
FBgn0011660	Pms2	10.0232	2.35625	3.24755	2.29591	4.48073
FBgn0011661	Moe	200.346	1126.89	1192.32	1372.14	972.924
FBgn0011666	msi	21.2616	25.0468	41.0994	34.4628	30.4677
FBgn0011668	Mst57Da	0	0	0	0	0
FBgn0011669	Mst57Db	0	0	0	0	0
FBgn0011670	Mst57Dc	0	0	0	0	0
FBgn0011672	Mvl	29.5013	10.8499	17.1148	11.0029	17.1172
FBgn0011674	insc	3.13443	3.13758	3.96669	3.39164	3.40759
FBgn0011676	Nos	0.0642119	0.047314	0.372414	0.0550414	0.134745
FBgn0011692	pav	9.30795	0.07981	0.8265	0.208842	2.60578
FBgn0011693	Pdh	0.597283	0	0.247846	0	0.211282
FBgn0011694	EbpII	0	0	0	0.173423	0.0433557
FBgn0011695	EbpIII	25757.2	11379.5	8099.43	10892.7	14032.2
FBgn0011701	repo	8.76115	5.72088	4.67718	4.24712	5.85158
FBgn0011703	RnrL	23.6569	0.644536	11.83	1.71248	9.46098
FBgn0011704	RnrS	35.0814	3.12006	10.9808	5.08597	13.5671
FBgn0011705	rost	16.6334	13.1503	16.3822	24.8705	17.7591
FBgn0011706	rpr	0.729812	0.261279	0.216181	0.215663	0.355734
FBgn0011708	Syx5	53.4613	23.217	19.7628	16.9444	28.3464
FBgn0011710	2022-09-01	27.6078	7.71479	7.44117	4.95651	11.9301
FBgn0011715	Snr1	42.1957	10.238	8.34396	5.61652	16.5985
FBgn0011722	Tig	6.40079	4.0101	3.61087	4.12948	4.53781
FBgn0011723	byn	0.99188	0	0	0	0.24797
FBgn0011725	twin	28.8957	33.9447	38.544	37.1797	34.641
FBgn0011726	tsr	419.734	124.474	117.523	78.8542	185.146
FBgn0011737	Wee1	14.4045	4.50074	4.99314	3.73064	6.90726
FBgn0011739	wts	17.2731	12.1348	14.0869	13.3916	14.2216
FBgn0011740	alpha-Man-IIa	12.1437	5.51933	8.72339	5.39394	7.94509
FBgn0011741	Arp6	30.4649	9.76011	8.58314	6.71063	13.8797
FBgn0011742	Arp2	35.8654	14.1674	20.1525	11.6035	20.4472
FBgn0011743	Arp53D	0	0	0	0	0
FBgn0011745	Arp1	60.5439	23.9537	24.1718	20.3117	32.2453
FBgn0011746	ana	0.548315	0.432043	0.437926	0.513143	0.482857
FBgn0011747	Ank	48.6947	27.7855	39.3114	20.026	33.9544
FBgn0011754	PhKgamma	96.4363	109.497	150.683	106.456	115.768
FBgn0011758	B-H1	12.8026	42.0052	52.6459	46.2113	38.4162
FBgn0011760	ctp	200.046	110.568	102.53	88.6028	125.437
FBgn0011761	dhd	313.201	0.643735	396.527	30.345	185.179
FBgn0011762	DNApol-alpha50	5.45162	0.551284	1.00432	0.614077	1.90533
FBgn0011763	Dp	47.4729	16.6977	20.7373	12.7363	24.4111
FBgn0011766	E2f1	28.5838	93.5607	126.797	113.903	90.7111
FBgn0011768	Fdh	94.6398	36.2215	34.7707	23.4312	47.2658
FBgn0011769	Fdx1	14.6288	6.21593	4.10197	4.60342	7.38753
FBgn0011770	Gip	46.1638	17.7838	16.4897	12.0204	23.1144
FBgn0011771	Hem	12.5672	5.73996	5.17222	3.98566	6.86626
FBgn0011774	Irbp	9.99745	2.76301	3.49041	2.10689	4.58944
FBgn0011785	BRWD3	19.0116	7.48138	8.86641	6.40671	10.4415
FBgn0011787	mRpL12	49.81	14.6842	21.9713	13.1524	24.9045
FBgn0011802	Gem3	4.3981	1.256	1.54187	1.2245	2.10512
FBgn0011812	Lcp1Psi	0	0	0	0	0
FBgn0011817	nmo	27.013	78.14	99.9148	111.851	79.2297
FBgn0011818	oaf	10.4257	3.31965	4.44221	3.48088	5.41711
FBgn0011822	Pgcl	0	0	0	0	0
FBgn0011824	CG4038	27.0408	5.5957	7.29546	5.78536	11.4293
FBgn0011826	Pp2B-14D	24.6091	63.7999	77.7617	68.8748	58.7614
FBgn0011828	Pxn	28.652	9.26833	10.4293	7.55743	13.9768
FBgn0011829	Ret	0.815606	0.400085	0.531948	0.424757	0.543099
FBgn0011832	Ser12	0	0	0	0	0
FBgn0011834	Ser6	0	0	0.396333	0	0.0990832
FBgn0011836	Taf2	9.02246	2.44975	3.56759	4.06879	4.77715
FBgn0011837	Tis11	31.6542	189.675	208.339	260.202	172.468
FBgn0011840	tRNA:Ala-AGC-2-3	0	0	0	0	0
FBgn0011844	tRNA:Asp-GTC-1-10	0	0	0	0	0
FBgn0011845	tRNA:Asp-GTC-1-11	0	0	0	0	0
FBgn0011848	tRNA:Glu-TTC-1-6	0	0	0	0	0
FBgn0011849	tRNA:Glu-TTC-1-5	0	0	0	3708.66	927.165
FBgn0011850	tRNA:Glu-TTC-1-4	0	0	0	3708.66	927.165
FBgn0011851	tRNA:Glu-CTC-3-4	0	0	0	0	0
FBgn0011852	tRNA:Glu-CTC-3-5	0	0	0	0	0
FBgn0011853	tRNA:Glu-CTC-3-6	0	0	0	0	0
FBgn0011854	tRNA:Glu-CTC-3-8	0	0	0	0	0
FBgn0011855	tRNA:Glu-CTC-3-9	0	0	0	0	0
FBgn0011858	tRNA:Phe-GAA-1-8	0	0	0	0	0
FBgn0011859	tRNA:Gly-GCC-1-1	0	0	0	0	0
FBgn0011860	tRNA:Gly-GCC-1-2	0	0	0	0	0
FBgn0011861	tRNA:Gly-GCC-1-3	0	0	0	0	0
FBgn0011862	tRNA:Gly-GCC-1-4	0	0	0	0	0
FBgn0011863	tRNA:Gly-GCC-1-5	0	0	0	0	0
FBgn0011864	tRNA:Gly-GCC-1-6	0	0	0	0	0
FBgn0011865	tRNA:Gly-GCC-1-7	0	0	0	0	0
FBgn0011866	tRNA:Gly-GCC-2-1	0	0	0	0	0
FBgn0011867	tRNA:Gly-GCC-1-8	0	0	0	0	0
FBgn0011868	tRNA:Gly-GCC-1-9	0	0	0	0	0
FBgn0011869	tRNA:Gly-GCC-1-10	0	0	0	0	0
FBgn0011870	tRNA:Gly-GCC-1-11	0	0	0	0	0
FBgn0011871	tRNA:Gly-GCC-1-12	0	0	0	0	0
FBgn0011872	tRNA:Gly-GCC-1-13	0	0	0	0	0
FBgn0011877	tRNA:His-GTG-2-1Psi	0	0	0	0	0
FBgn0011878	tRNA:His-GTG-1-4	0	0	0	0	0
FBgn0011879	tRNA:Ala-TGC-2-1	0	0	0	0	0
FBgn0011880	tRNA:Ile-AAT-1-1	0	0	0	0	0
FBgn0011881	tRNA:Ile-AAT-1-3	0	0	0	0	0
FBgn0011882	tRNA:Ile-AAT-1-4	0	0	0	0	0
FBgn0011883	tRNA:Ile-AAT-1-5	0	0	0	0	0
FBgn0011884	tRNA:Ile-AAT-1-6	0	0	0	0	0
FBgn0011885	tRNA:Ile-AAT-1-7	0	0	0	0	0
FBgn0011887	tRNA:Lys-CTT-1-4	0	0	0	0	0
FBgn0011888	tRNA:Lys-CTT-1-3	0	0	0	0	0
FBgn0011889	tRNA:Lys-CTT-1-2	0	0	0	1420.28	355.07
FBgn0011890	tRNA:Lys-CTT-1-5	0	0	0	0	0
FBgn0011891	tRNA:Lys-CTT-1-1	0	0	0	0	0
FBgn0011892	tRNA:Lys-CTT-1-6	0	0	0	0	0
FBgn0011893	tRNA:Lys-CTT-1-7	0	0	0	1420.28	355.07
FBgn0011894	tRNA:Lys-CTT-1-8	0	0	0	1420.28	355.07
FBgn0011895	tRNA:Lys-CTT-1-9	0	0	0	0	0
FBgn0011896	tRNA:Lys-CTT-1-10	0	0	0	1420.28	355.07
FBgn0011897	tRNA:Lys-CTT-1-11	0	0	0	0	0
FBgn0011902	tRNA:Lys-TTT-1-1	0	0	0	0	0
FBgn0011904	tRNA:Lys-TTT-2-4	0	0	0	0	0
FBgn0011905	tRNA:Lys-TTT-2-5	0	0	0	0	0
FBgn0011906	tRNA:Leu-CAG-1-1	0	0	0	0	0
FBgn0011909	tRNA:Leu-CAA-2-1	0	0	0	0	0
FBgn0011910	tRNA:Leu-CAA-1-1	0	0	0	0	0
FBgn0011915	tRNA:Met-CAT-1-1	0	0	0	0	0
FBgn0011916	tRNA:Met-CAT-1-2	0	0	0	0	0
FBgn0011919	tRNA:Met-CAT-1-5	0	0	0	0	0
FBgn0011921	tRNA:iMet-CAT-2-1	0	0	0	0	0
FBgn0011927	tRNA:iMet-CAT-1-4	0	0	0	0	0
FBgn0011928	tRNA:iMet-CAT-1-5	0	0	0	0	0
FBgn0011931	tRNA:Asn-GTT-1-6	0	0	0	0	0
FBgn0011932	tRNA:Asn-GTT-1-5	0	0	0	0	0
FBgn0011933	tRNA:Asn-GTT-1-4	0	0	0	0	0
FBgn0011934	tRNA:Asn-GTT-1-8	0	0	0	0	0
FBgn0011935	tRNA:Asn-GTT-1-7	0	0	0	0	0
FBgn0011936	tRNA:Asn-GTT-1-3	0	0	0	0	0
FBgn0011937	tRNA:Asn-GTT-1-2	0	0	0	0	0
FBgn0011938	tRNA:Asn-GTT-1-1	0	0	0	0	0
FBgn0011944	tRNA:Pro-TGG-1-1	0	0	0	0	0
FBgn0011945	tRNA:Pro-TGG-1-2	0	0	0	0	0
FBgn0011948	tRNA:Arg-TCG-3-1	0	0	0	0	0
FBgn0011949	tRNA:Arg-TCG-3-2	0	0	0	0	0
FBgn0011950	tRNA:Arg-TCG-3-3	0	0	0	0	0
FBgn0011951	tRNA:Arg-TCG-3-4	0	0	0	0	0
FBgn0011952	tRNA:Arg-TCG-2-1	0	0	0	0	0
FBgn0011953	tRNA:Arg-TCG-1-1	0	0	0	0	0
FBgn0011954	tRNA:Arg-TCG-2-2	0	0	0	0	0
FBgn0011955	tRNA:Arg-ACG-1-5	0	0	0	0	0
FBgn0011956	tRNA:Arg-ACG-1-3	0	0	0	0	0
FBgn0011957	tRNA:Arg-ACG-1-2	0	0	0	0	0
FBgn0011958	tRNA:Arg-ACG-1-1	0	0	0	0	0
FBgn0011959	tRNA:Arg-ACG-1-10	0	0	0	0	0
FBgn0011960	tRNA:Arg-ACG-1-9	0	0	0	0	0
FBgn0011961	tRNA:Arg-ACG-1-8	0	0	0	0	0
FBgn0011962	tRNA:Arg-ACG-1-7	0	0	0	0	0
FBgn0011963	tRNA:Arg-ACG-1-6	0	0	0	0	0
FBgn0011965	tRNA:Arg-TCG-4-1	0	0	0	0	0
FBgn0011966	tRNA:Arg-TCG-2-3	0	0	0	0	0
FBgn0011970	tRNA:Ser-GCT-2-1	0	0	0	0	0
FBgn0011971	tRNA:Ser-GCT-2-2	0	0	0	0	0
FBgn0011974	tRNA:Ser-AGA-1-1	0	0	0	0	0
FBgn0011975	tRNA:Ser-CGA-1-1	0	0	0	0	0
FBgn0011976	tRNA:Ser-CGA-1-2	0	0	0	0	0
FBgn0011977	tRNA:Ser-CGA-1-3	0	0	0	0	0
FBgn0011980	tRNA:Ser-AGA-3-1	0	0	0	0	0
FBgn0011981	tRNA:Ser-AGA-3-2	0	0	0	0	0
FBgn0011982	tRNA:Ser-AGA-2-1	0	0	0	0	0
FBgn0011983	tRNA:Ser-AGA-2-2	0	0	0	0	0
FBgn0011984	tRNA:Ser-AGA-2-4	0	0	0	0	0
FBgn0011985	tRNA:Ser-AGA-2-3	0	0	0	0	0
FBgn0011986	tRNA:Ser-AGA-2-5	0	0	0	0	0
FBgn0011987	tRNA:SeC-TCA-1-1	0	0	0	308.279	77.0697
FBgn0011993	tRNA:Thr-AGT-1-5	0	0	0	0	0
FBgn0011994	tRNA:Thr-AGT-1-6	0	0	0	0	0
FBgn0011998	tRNA:Val-CAC-2-2	0	0	0	0	0
FBgn0011999	tRNA:Val-CAC-2-1	0	0	0	0	0
FBgn0012000	tRNA:Val-CAC-2-3	0	0	0	0	0
FBgn0012001	tRNA:Val-CAC-2-4	0	0	0	0	0
FBgn0012002	tRNA:Val-CAC-1-1	0	0	0	0	0
FBgn0012003	tRNA:Val-CAC-2-5	0	0	0	0	0
FBgn0012004	tRNA:Val-CAC-2-6	0	0	0	0	0
FBgn0012009	tRNA:Val-AAC-2-4	0	0	0	0	0
FBgn0012010	tRNA:Val-AAC-2-3	0	0	0	0	0
FBgn0012011	tRNA:Val-AAC-1-1	0	0	0	0	0
FBgn0012016	tRNA:Tyr-GTA-1-3	0	0	0	0	0
FBgn0012017	tRNA:Tyr-GTA-1-2	0	0	0	0	0
FBgn0012018	tRNA:Tyr-GTA-1-9	0	0	0	0	0
FBgn0012024	tRNA:Tyr-GTA-1-8	0	0	0	0	0
FBgn0012025	tRNA:Tyr-GTA-1-7	0	0	0	0	0
FBgn0012026	tRNA:Tyr-GTA-1-6	0	0	0	0	0
FBgn0012027	tRNA:Tyr-GTA-1-5	0	0	0	0	0
FBgn0012028	tRNA:Tyr-GTA-1-4	0	0	0	0	0
FBgn0012034	AcCoAS	71.3046	36.8159	29.3761	24.6354	40.533
FBgn0012036	Aldh	495.297	179.977	119.712	125.779	230.191
FBgn0012037	Ance	70.1172	23.8129	20.9256	22.9975	34.4633
FBgn0012042	AttA	25.6547	10.4966	6.87686	10.8941	13.4806
FBgn0012051	CalpA	72.2738	35.6592	39.5222	26.1577	43.4032
FBgn0012058	Cdc27	18.7064	21.042	25.0617	22.9131	21.9308
FBgn0012344	Dh44	0.792101	2.41627	2.97594	3.3788	2.39078
FBgn0013263	Trl	46.0049	20.7769	22.1041	18.8874	26.9433
FBgn0013269	Fkbp39	88.1429	6.72159	18.4963	7.11589	30.1192
FBgn0013272	Gp150	278.49	127.744	89.042	93.1719	147.112
FBgn0013275	Hsp70Aa	0.907236	0.468369	0.433616	0.301889	0.527778
FBgn0013276	Hsp70Ab	1.00593	0.373146	0.49226	0.509365	0.595175
FBgn0013277	Hsp70Ba	0.310596	0.1557	0.0820728	0.183283	0.182913
FBgn0013278	Hsp70Bb	0.274951	0.0840107	0.150777	0.111576	0.155329
FBgn0013279	Hsp70Bc	0.1271	0.137502	0.0341697	0.0547881	0.0883899
FBgn0013300	ProtA	0	0	0	0	0
FBgn0013301	ProtB	0	0	0	0	0
FBgn0013303	Nca	59.7026	30.0477	32.368	24.2919	36.6026
FBgn0013305	Nmda1	120.291	54.8141	44.1151	53.5386	68.1897
FBgn0013307	Odc1	0.196072	0	0.23817	0.0285759	0.115704
FBgn0013308	Odc2	0	0	0	0	0
FBgn0013323	Ptth	0	0	0	0	0
FBgn0013325	RpL11	1192.03	366.409	291.443	301.744	537.906
FBgn0013334	Sap47	60.0652	335.117	355.421	368.322	279.731
FBgn0013342	nSyb	47.8182	30.6867	37.8789	27.6644	36.0121
FBgn0013343	Syx1A	51.1	372.347	371.926	452.001	311.844
FBgn0013347	TfIIA-S	116.815	45.1376	35.582	29.2158	56.6876
FBgn0013348	TpnC41C	463.606	166.431	101.998	86.8954	204.733
FBgn0013432	bcn92	34.6599	16.3705	14.8366	9.80557	18.9181
FBgn0013433	beat-Ia	0.289837	0.375247	0.423914	0.158655	0.311913
FBgn0013435	Cdc2rk	8.44685	2.76717	2.3863	1.94689	3.8868
FBgn0013467	igl	28.9553	24.8109	24.2865	13.5787	22.9078
FBgn0013469	klu	12.481	29.6574	28.8906	32.5823	25.9028
FBgn0013531	MED20	7.03899	2.54348	0.631516	1.80197	3.00399
FBgn0013548	l(2)dtl	11.6348	1.60395	3.30654	1.54941	4.52368
FBgn0013563	Pex1	9.49967	3.08242	3.22446	3.16037	4.74173
FBgn0013576	mtd	94.2144	60.2294	63.7406	32.5197	62.676
FBgn0013672	mt:ATPase6	0	0	0	0	0
FBgn0013673	mt:ATPase8	0	0	0	0	0
FBgn0013674	mt:CoI	0	0	0	0	0
FBgn0013675	mt:CoII	0	0	0	0	0
FBgn0013676	mt:CoIII	0	0	0	0	0
FBgn0013678	mt:Cyt-b	0	0	0	0	0
FBgn0013679	mt:ND1	0	0	0	0	0
FBgn0013680	mt:ND2	0	0	0	0	0
FBgn0013681	mt:ND3	0	0	0	0	0
FBgn0013683	mt:ND4L	0	0	0	0	0
FBgn0013684	mt:ND5	0	0	0	0	0
FBgn0013685	mt:ND6	0	0	0	0	0
FBgn0013686	mt:lrRNA	0	0	0	0	0
FBgn0013687	mt:ori	0	0	0	0	0
FBgn0013688	mt:srRNA	0	0	0	0	0
FBgn0013689	mt:tRNA:Ala-TGC	0	0	0	0	0
FBgn0013690	mt:tRNA:Cys-GCA	0	0	0	0	0
FBgn0013691	mt:tRNA:Asp-GTC	0	0	0	0	0
FBgn0013692	mt:tRNA:Glu-TTC	0	0	0	0	0
FBgn0013693	mt:tRNA:Phe-GAA	0	0	0	0	0
FBgn0013694	mt:tRNA:Gly-TCC	0	0	0	0	0
FBgn0013695	mt:tRNA:His-GTG	0	0	0	0	0
FBgn0013696	mt:tRNA:Ile-GAT	0	0	0	0	0
FBgn0013697	mt:tRNA:Lys-CTT	0	0	0	0	0
FBgn0013698	mt:tRNA:Leu-TAG	0	0	0	0	0
FBgn0013699	mt:tRNA:Leu-TAA	0	0	0	0	0
FBgn0013700	mt:tRNA:Met-CAT	0	0	0	0	0
FBgn0013701	mt:tRNA:Asn-GTT	0	0	0	0	0
FBgn0013702	mt:tRNA:Pro-TGG	0	0	0	0	0
FBgn0013703	mt:tRNA:Gln-TTG	0	0	0	0	0
FBgn0013704	mt:tRNA:Arg-TCG	0	0	0	0	0
FBgn0013705	mt:tRNA:Ser-GCT	0	0	0	0	0
FBgn0013706	mt:tRNA:Ser-TGA	0	0	0	0	0
FBgn0013707	mt:tRNA:Thr-TGT	0	0	0	0	0
FBgn0013708	mt:tRNA:Val-TAC	0	0	0	0	0
FBgn0013709	mt:tRNA:Trp-TCA	0	0	0	0	0
FBgn0013710	mt:tRNA:Tyr-GTA	0	0	0	0	0
FBgn0013717	not	10.007	2.29827	1.87069	1.96256	4.03463
FBgn0013718	nuf	50.7872	30.3108	34.2318	22.0483	34.3445
FBgn0013720	pck	66.6201	26.5808	23.3183	24.2814	35.2001
FBgn0013725	phyl	6.50773	23.7884	28.6387	26.9139	21.4622
FBgn0013726	pnut	41.7939	14.069	12.4192	9.64153	19.4809
FBgn0013732	sced	9.34244	1.85829	2.5937	1.07855	3.71825
FBgn0013733	shot	182.364	243.395	300.415	276.504	250.669
FBgn0013746	alien	45.3641	10.6262	10.6018	10.934	19.3815
FBgn0013749	Arf102F	131.923	49.1626	39.6508	38.7178	64.8636
FBgn0013750	Arf51F	70.8466	39.2533	33.9035	22.8071	41.7026
FBgn0013751	Awh	0	0	0	0.0162903	0.00407258
FBgn0013753	Bgb	25.0602	6.89136	4.14039	5.63169	10.4309
FBgn0013755	Bro	4.60437	0	0	0	1.15109
FBgn0013756	Mtor	22.6475	4.90502	8.52344	4.01174	10.0219
FBgn0013759	CASK	24.3603	34.3114	48.7803	46.3761	38.457
FBgn0013762	Cdk5	10.8566	4.77199	5.17991	4.16923	6.24443
FBgn0013763	Idgf6	286.796	86.6464	54.52	66.7525	123.679
FBgn0013764	Chi	29.4091	9.98169	9.70732	8.63816	14.4341
FBgn0013765	cnn	34.3895	10.7539	15.8265	11.0636	18.0084
FBgn0013767	Crz	0.0740586	0	0	0	0.0185147
FBgn0013770	Cp1	467.433	206.438	204.307	170.877	262.264
FBgn0013771	Cyp6a9	6.28727	3.53332	1.78131	1.61428	3.30404
FBgn0013772	Cyp6a8	0.98527	0.476619	0.15789	0.189718	0.452374
FBgn0013773	Cyp6a22	13.0279	3.67214	4.67646	2.66043	6.00923
FBgn0013799	Deaf1	21.9291	53.8924	64.0881	80.8363	55.1865
FBgn0013810	Dhc36C	0.75771	0.216601	0.658161	0.288305	0.480194
FBgn0013811	Dhc62B	0.232393	0.170894	0.197853	0.120423	0.180391
FBgn0013812	Dhc93AB	5.0295	2.25261	3.31744	1.91735	3.12922
FBgn0013813	Dhc98D	0.136668	0.0516243	0.122747	0.0403255	0.0878412
FBgn0013949	Elal	3.79567	2.70371	1.22041	1.37291	2.27318
FBgn0013953	Esp	32.6602	19.6916	19.4595	22.0467	23.4645
FBgn0013954	Fkbp12	438.407	208.815	239.199	115.828	250.562
FBgn0013972	Gycalpha99B	11.1561	4.36821	5.75702	5.49107	6.6931
FBgn0013973	Gycbeta100B	5.55466	3.30173	6.05559	2.90627	4.45456
FBgn0013981	His4r	1039.71	657.967	489.256	592.271	694.801
FBgn0013983	imd	22.3292	14.1334	8.39006	9.80063	13.6633
FBgn0013987	MAPk-Ak2	74.6346	41.6613	40.2528	25.9653	45.6285
FBgn0013995	Calx	32.6768	13.7909	21.452	12.5694	20.1223
FBgn0013997	Nrx-IV	29.6659	21.3883	24.8035	18.6012	23.6147
FBgn0014000	Hf	266.627	123.923	93.5312	98.6244	145.676
FBgn0014006	Ask1	23.917	18.4149	20.5859	18.8467	20.4411
FBgn0014007	Ptp69D	9.24737	2.64677	4.02051	2.4599	4.59364
FBgn0014009	Rab2	127.121	63.3199	53.2504	46.4147	72.5265
FBgn0014010	Rab5	128.162	203.628	209.626	209.753	187.792
FBgn0014011	Rac2	65.474	269.688	264.822	365.585	241.392
FBgn0014018	Rel	98.9827	49.3187	35.41	34.6283	54.5849
FBgn0014019	Rh5	0.691364	0.342922	0.764809	0.21885	0.504486
FBgn0014020	Rho1	200.325	114.901	105.679	71.7938	123.175
FBgn0014022	Rlb1	10.4291	4.8348	3.25894	2.34283	5.21642
FBgn0014023	mRpL47	28.0635	6.53736	7.52252	7.76205	12.4714
FBgn0014024	Rnp4F	17.8563	10.8243	14.6732	28.0509	17.8512
FBgn0014026	RpL7A	1540.79	533.219	370.613	346.76	697.845
FBgn0014028	SdhB	547.881	199.612	158.352	140.546	261.598
FBgn0014029	2022-09-02	42.8613	13.5213	10.4441	10.275	19.2754
FBgn0014031	Spat	0.370554	0	0.310336	0.198698	0.219897
FBgn0014032	Sptr	132.333	64.8143	44.1938	35.4269	69.192
FBgn0014033	Sr-CI	35.4989	11.1461	11.3601	9.07884	16.771
FBgn0014037	Su(Tpl)	61.7084	374.724	422.227	527.758	346.604
FBgn0014073	Tie	26.8893	16.4358	17.0861	12.4651	18.2191
FBgn0014075	Uggt	24.7307	10.5962	8.58606	6.15241	12.5163
FBgn0014076	Vm32E	4.81705	0	1.6503	0.130632	1.6495
FBgn0014092	CG4278	14.0602	5.45917	5.85928	4.15797	7.38415
FBgn0014127	barr	11.3571	2.18359	4.18231	2.147	4.9675
FBgn0014133	bif	25.977	7.03507	11.765	7.06494	12.9605
FBgn0014135	bnl	5.00643	26.589	22.8595	29.0717	20.8817
FBgn0014141	cher	241.223	88.1813	74.4076	66.8072	117.655
FBgn0014143	croc	0.469034	0	0	0.013947	0.120745
FBgn0014163	fax	92.8014	523.155	606.092	607.039	457.272
FBgn0014179	gcm	0.0404981	0	0	0	0.0101245
FBgn0014184	Oda	1242.46	4822.34	4707.33	5950.13	4180.57
FBgn0014189	Hel25E	101.43	19.7376	23.5544	18.7103	40.8581
FBgn0014269	prod	28.5746	9.8948	9.2315	7.22017	13.7303
FBgn0014340	mof	7.36998	2.00489	2.76529	2.43412	3.64357
FBgn0014342	mia	3.13553	1.23359	1.67107	1.50502	1.8863
FBgn0014343	mirr	0.333017	1.07962	1.02316	1.28497	0.930192
FBgn0014366	noi	20.2717	5.28451	5.26403	3.8137	8.65848
FBgn0014368	nol	0.271506	0.169384	1.11942	0.249678	0.452497
FBgn0014380	RhoL	39.8795	21.119	24.7117	14.9053	25.1539
FBgn0014388	sty	24.3989	175.424	166.958	184.351	137.783
FBgn0014391	sun	936.283	456.025	315.811	245.567	488.421
FBgn0014395	tilB	1.2203	0.182873	0.367709	0.259622	0.507626
FBgn0014396	tim	27.4603	14.3085	44.8692	24.2826	27.7302
FBgn0014411	Vps26	36.3817	18.1311	14.4564	11.2422	20.0528
FBgn0014417	CG13397	11.2913	1.26683	5.40995	1.0662	4.75857
FBgn0014427	CG11899	68.5841	20.6966	14.9202	18.975	30.794
FBgn0014454	Acp1	1.34535	3.11295	0.922514	0.735915	1.52918
FBgn0014455	Ahcy	37.1104	11.5209	13.8489	7.72816	17.5521
FBgn0014464	Cp7Fa	0.20558	0	9.24707	0.181073	2.40843
FBgn0014465	Cp7Fb	1.67246	0.0476888	4.27603	0.367172	1.59084
FBgn0014466	Cp7Fc	1.51029	0	0.485248	0.129304	0.53121
FBgn0014469	Cyp4e2	105.008	50.4953	36.8046	32.4763	56.196
FBgn0014848	Eig71Eh	0	0	0	0	0
FBgn0014849	Eig71Ei	0	0	0	0	0
FBgn0014850	Eig71Ej	0	0	0	0	0
FBgn0014851	Eig71Ek	0	0	0	0	0
FBgn0014857	His3.3A	171.549	81.0169	59.6619	51.0443	90.818
FBgn0014859	Hr38	3.8181	2.76173	2.67967	2.80324	3.01568
FBgn0014861	Mcm2	12.7647	0.778786	3.21663	0.709636	4.36744
FBgn0014863	Mlp84B	976.653	517.85	346.441	258.396	524.835
FBgn0014865	Mtk	59.2576	22.9511	16.2403	14.7675	28.3041
FBgn0014868	Ost48	75.3497	27.4199	33.6957	19.6944	39.0399
FBgn0014869	Pglym78	415.533	159.404	132.825	113.443	205.301
FBgn0014870	Psi	20.3824	19.0244	21.7623	26.4268	21.899
FBgn0014877	Roe1	32.931	9.31145	11.2839	10.9109	16.1093
FBgn0014879	Set	72.793	10.7373	20.4455	8.8264	28.2005
FBgn0014903	CG14630	2.29451	0.766806	1.7896	0.940682	1.4479
FBgn0014906	Hydr2	37.2917	11.9765	12.267	9.45598	17.7478
FBgn0014930	CG2846	33.8765	12.8606	13.9453	11.4022	18.0211
FBgn0014931	CG2678	2.2622	0	0.449276	0.0744638	0.696485
FBgn0014949	btn	0.945689	0.341978	0.470353	0.668279	0.606575
FBgn0015000	betaggt-I	12.3554	5.08056	4.18721	3.89613	6.37983
FBgn0015001	iotaTry	0.274967	0	0.491833	0.147062	0.228466
FBgn0015008	Actn3	0	0	0	0	0
FBgn0015010	Ag5r	0.511067	1.88144	1.68206	1.6635	1.43452
FBgn0015011	AhcyL2	15.9751	4.36025	5.20672	5.33753	7.7199
FBgn0015019	CCT3	54.0464	18.0077	20.8133	12.0564	26.2309
FBgn0015024	CkIalpha	156.082	1001.19	1049.87	1143.26	837.601
FBgn0015025	CkIIalpha-i1	3.81756	1.80888	1.10088	0.758664	1.8715
FBgn0015031	cype	1731.35	682.226	447.353	437.183	824.528
FBgn0015032	Cyp4c3	1.42158	0.476682	0.482532	0.29875	0.669886
FBgn0015033	Cyp4d8	11.6017	3.40789	2.91305	3.54245	5.36627
FBgn0015034	Cyp4e1	17.0866	7.55496	6.38386	5.60985	9.15882
FBgn0015035	Cyp4e3	205.791	80.4026	72.1399	62.9729	105.327
FBgn0015036	Cyp4ae1	4.07744	0.947486	0.969336	1.36821	1.84062
FBgn0015037	Cyp4p1	218.09	108.848	91.0694	76.5392	123.637
FBgn0015038	Cyp9b1	47.72	20.998	13.5129	15.9847	24.5539
FBgn0015039	Cyp9b2	107.712	47.3345	40.3059	32.8731	57.0564
FBgn0015040	Cyp9c1	6.52641	2.89179	2.58905	1.82755	3.4587
FBgn0015075	Ddx1	13.0088	4.31553	5.14292	4.14101	6.65207
FBgn0015218	eIF4E1	175.894	66.4377	68.8798	54.0789	91.3226
FBgn0015221	Fer2LCH	919.271	451.278	333.126	354.899	514.644
FBgn0015222	Fer1HCH	884.004	388.139	318.557	334.646	481.337
FBgn0015229	glec	44.2913	73.6493	104.701	49.3235	67.9913
FBgn0015230	Glut3	0	0	0	0	0
FBgn0015239	Hr78	35.6353	13.4306	17.1133	14.7002	20.2198
FBgn0015240	Hr96	13.0463	6.80429	5.50463	4.45254	7.45194
FBgn0015245	Hsp60A	101.297	35.6707	41.7088	30.0685	52.1862
FBgn0015247	Diap2	50.9556	22.749	25.4199	18.3968	29.3803
FBgn0015268	Nap1	211.501	65.4793	81.6545	58.0556	104.173
FBgn0015269	Nf1	10.1618	6.53373	9.13761	5.51054	7.83592
FBgn0015270	Orc2	4.05551	0.100631	0.583432	0.25046	1.24751
FBgn0015271	Orc5	7.23432	2.14998	1.99884	1.27129	3.16361
FBgn0015277	Pi3K59F	12.4016	3.54261	3.1194	5.00445	6.01702
FBgn0015278	Pi3K68D	14.9745	6.29858	7.82077	5.55951	8.66334
FBgn0015279	Pi3K92E	16.6923	7.66739	8.36289	6.15138	9.71849
FBgn0015282	Rpt2	113.003	52.1709	48.9291	38.3005	63.1009
FBgn0015283	Rpn10	92.8407	37.0312	35.9036	25.6693	47.8612
FBgn0015286	Rala	25.3644	21.7943	25.5537	20.859	23.3929
FBgn0015288	RpL22	1149.95	374.171	255.647	330.959	527.682
FBgn0015295	Shark	12.5391	4.57665	4.1507	3.3764	6.16071
FBgn0015296	Shc	23.947	8.77392	11.0502	7.78352	12.8887
FBgn0015298	Srp19	44.6777	11.4647	9.47687	13.9935	19.9032
FBgn0015299	Ssb-c31a	39.3587	8.47469	15.9202	9.31927	18.2682
FBgn0015300	Ssl	0.144557	0.0862124	0.0713331	0.1281	0.107551
FBgn0015316	Try29F	1.35204	0.416618	0.551574	0.74305	0.765821
FBgn0015320	Ubc2	36.4367	108.773	111.78	100.21	89.2999
FBgn0015321	Ubc4	84.6473	100.167	121.278	143.199	112.323
FBgn0015331	abs	10.0422	5.65209	6.27884	3.35616	6.33232
FBgn0015336	CG15865	0	0	0	0	0
FBgn0015338	CG5861	23.3172	12.0313	6.32262	9.27327	12.7361
FBgn0015351	CG14906	5.45168	2.76288	1.1564	1.63355	2.75113
FBgn0015359	CG2034	25.7675	8.0551	9.74035	5.80857	12.3429
FBgn0015360	oxt	16.1198	4.76257	5.57869	4.33438	7.69886
FBgn0015371	chn	18.8491	31.089	34.0477	44.4105	32.0991
FBgn0015372	RabX1	16.4294	4.52122	4.83111	4.45619	7.55948
FBgn0015376	cutlet	1.77741	0.138326	0.43384	0.206841	0.639104
FBgn0015379	dod	29.8182	7.81911	9.38467	6.57833	13.4001
FBgn0015380	drl	4.38651	21.2323	20.6886	23.0899	17.3493
FBgn0015381	dsf	0	0	0	0	0
FBgn0015391	glu	12.3339	2.13488	3.48034	1.81829	4.94185
FBgn0015396	jumu	9.28416	0.384867	2.02857	0.587929	3.07138
FBgn0015399	kek1	13.5313	99.2223	94.1435	125.799	83.174
FBgn0015400	kek2	1.59662	2.83625	2.91298	4.13697	2.87071
FBgn0015402	ksr	14.7754	6.67017	5.87297	4.90076	8.05482
FBgn0015477	Rme-8	14.1209	5.26135	8.89979	5.49229	8.44358
FBgn0015509	Cul1	69.9858	18.6787	22.3906	14.6763	31.4329
FBgn0015513	mbc	19.0762	9.89202	13.9754	9.2273	13.0427
FBgn0015519	nAChRalpha3	0.170509	0.9106	1.42967	1.91033	1.10528
FBgn0015520	nonA-l	10.621	2.37139	3.20391	1.55404	4.43759
FBgn0015521	RpS21	647.277	271.559	182.721	156.55	314.527
FBgn0015522	olf186-M	22.4965	11.408	11.1273	9.44979	13.6204
FBgn0015524	otp	0.17158	0.368063	0.163978	0.350468	0.263522
FBgn0015527	peng	22.2916	6.53353	5.32008	3.6755	9.45518
FBgn0015543	snoRNA:Me28S-A1322	0	0	0	0	0
FBgn0015544	spag	13.1689	3.52327	5.59018	2.36223	6.16115
FBgn0015546	spel1	13.5073	4.21441	4.47558	3.8053	6.50065
FBgn0015550	tap	0	0	0	0	0
FBgn0015553	tos	6.37523	0.384297	1.45523	0.560547	2.19383
FBgn0015558	tty	3.75715	2.67495	3.963	1.83231	3.05685
FBgn0015561	unpg	0.44109	0.0404831	0.134103	0.140968	0.189161
FBgn0015568	alpha-Est1	194.39	89.9345	54.9615	55.7455	98.7579
FBgn0015569	alpha-Est10	74.1194	36.7514	23.9618	23.616	39.6121
FBgn0015570	alpha-Est2	1.2617	0.376814	0.82279	0.323962	0.696317
FBgn0015571	alpha-Est3	22.3285	11.2225	8.67487	7.78546	12.5028
FBgn0015572	alpha-Est4	1.22879	0.58388	0.93486	0.600354	0.836971
FBgn0015574	alpha-Est6	0.0211673	0	0	0	0.00529183
FBgn0015575	alpha-Est7	41.9963	18.3728	18.9359	14.5972	23.4756
FBgn0015576	alpha-Est8	69.922	38.3969	28.5324	23.9441	40.1989
FBgn0015577	alpha-Est9	24.2066	12.7655	9.91925	8.01032	13.7254
FBgn0015582	dare	9.57536	4.33793	4.52001	3.56603	5.49983
FBgn0015583	Acp29AB	0	0	0	0	0
FBgn0015584	Acp53Ea	0	0	0	0.115213	0.0288032
FBgn0015585	Acp63F	0	0	0	0	0
FBgn0015586	Acp76A	0	0	0	0	0
FBgn0015589	Apc	7.04467	3.20439	2.93936	2.88597	4.0186
FBgn0015591	AstA	0.0802543	0.857477	0.63615	0.286355	0.465059
FBgn0015600	toc	35.8915	15.4468	14.4761	11.7706	19.3963
FBgn0015602	BEAF-32	41.542	13.5722	16.0735	12.8319	21.0049
FBgn0015609	CadN	6.37542	45.0004	50.6873	46.5344	37.1494
FBgn0015614	CanB2	109.661	92.6897	92.3108	83.4861	94.5369
FBgn0015615	SMC3	17.6302	7.06768	7.28566	4.81883	9.20059
FBgn0015618	Cdk8	4.23603	1.40883	0.658561	0.971646	1.81877
FBgn0015621	Clp	8.19046	2.02752	2.8055	1.43845	3.61548
FBgn0015622	Cnx99A	79.8999	29.6027	35.4119	23.3325	42.0618
FBgn0015623	Cpr	366.05	166.239	138.75	114.881	196.48
FBgn0015625	CycB3	43.9184	0.425148	8.44517	1.48268	13.5678
FBgn0015663	Ugt36A1	5.14833	1.24963	0.87637	1.38161	2.16398
FBgn0015664	Dref	22.583	5.72402	6.34807	4.11273	9.69196
FBgn0015714	Cyp6a17	94.4196	50.1587	25.4488	26.5251	49.1381
FBgn0015721	ktub	3.46537	1.72747	1.37677	1.00392	1.89338
FBgn0015737	Hmu	169.951	78.4357	64.983	54.7852	92.0387
FBgn0015754	Lis-1	90.5847	38.0774	35.9799	29.1304	48.4431
FBgn0015756	RpL9	1153.06	344.713	254.881	245.481	499.534
FBgn0015765	p38a	23.7243	9.10332	6.84657	6.88156	11.6389
FBgn0015766	Msr-110	1362.52	824.323	580.403	534.171	825.354
FBgn0015770	MstProx	0	0	0	0	0
FBgn0015772	Nak	35.5815	26.2741	33.995	22.4868	29.5843
FBgn0015773	NetA	1.9201	0.945703	1.12627	0.726625	1.17967
FBgn0015774	NetB	5.44686	13.121	13.3544	15.2931	11.8038
FBgn0015776	nrv1	284.338	137.397	106.507	78.5051	151.687
FBgn0015777	nrv2	134.046	80.0087	64.9273	46.4771	81.3648
FBgn0015778	rin	67.1406	405.243	486.951	490.531	362.466
FBgn0015781	P5cr	19.876	5.64067	7.10766	5.19559	9.45498
FBgn0015789	Rab10	95.7325	43.9685	40.5128	26.7766	51.7476
FBgn0015790	Rab11	138.188	57.02	55.7365	44.2329	73.7944
FBgn0015791	Rab14	88.2824	336.133	341.191	440.164	301.443
FBgn0015793	Rab19	19.5714	9.603	8.79378	7.27913	11.3118
FBgn0015794	Rab18	72.372	30.4081	29.1541	27.1255	39.7649
FBgn0015795	Rab7	142.498	75.105	54.7546	53.8083	81.5415
FBgn0015797	Rab6	34.4996	18.4656	19.3219	13.5221	21.4523
FBgn0015799	Rbf	20.624	6.82192	8.75406	5.84904	10.5123
FBgn0015801	Reg-5	118.209	54.0036	57.3918	49.9406	69.8863
FBgn0015803	RtGEF	22.7879	10.4085	12.0482	9.47346	13.6795
FBgn0015805	HDAC1	60.9589	13.2141	16.3723	10.2775	25.2057
FBgn0015808	ScpX	205.931	99.5869	80.1075	62.6914	112.079
FBgn0015818	Spx	15.4792	5.01794	4.08619	3.32781	6.97779
FBgn0015828	TfIIEalpha	22.3659	7.55443	7.06423	5.23482	10.5548
FBgn0015829	TfIIEbeta	26.2157	12.0687	10.4332	8.00243	14.18
FBgn0015831	Rtnl2	0.0913306	0	0.236038	0	0.0818422
FBgn0015834	eIF3i	179.061	62.0562	39.8829	40.3457	80.3364
FBgn0015838	Vang	6.42239	6.6947	7.22934	5.51233	6.46469
FBgn0015872	Drip	41.4966	26.9698	18.7621	20.9141	27.0357
FBgn0015903	apt	22.2344	5.05118	7.76635	6.52585	10.3944
FBgn0015904	ara	8.83971	6.60382	6.1079	8.13375	7.42129
FBgn0015905	ast	4.89138	1.42762	0.53757	1.11694	1.99338
FBgn0015919	caup	6.84383	5.47899	6.64366	4.67355	5.91001
FBgn0015924	crq	96.9094	42.5607	44.3734	29.8855	53.4323
FBgn0015925	csul	12.5981	2.34114	3.4115	2.08355	5.10857
FBgn0015926	dah	12.4193	0.0420207	2.19748	0.237398	3.72405
FBgn0015929	dpa	11.5705	0.5767	6.81271	0.954026	4.97848
FBgn0015946	grim	0.184621	0	0.116628	0.0800663	0.0953288
FBgn0015949	hrg	34.8896	10.7186	13.8701	9.80562	17.321
FBgn0016013	Faa	52.1237	21.3671	12.7103	10.8783	24.2699
FBgn0016031	lama	51.679	25.0678	20.1897	18.3688	28.8263
FBgn0016032	lbm	67.0462	24.8044	34.3154	25.2557	37.8554
FBgn0016034	mael	14.9772	0	1.92975	0.462627	4.34239
FBgn0016036	mei-P22	0.644745	0	0.22155	0.151677	0.254493
FBgn0016038	Vsp37A	30.4897	13.0517	13.2149	10.0531	16.7023
FBgn0016041	Tom40	43.0901	36.4352	44.2299	24.8183	37.1434
FBgn0016047	nompA	51.4209	24.4944	32.5563	22.9531	32.8562
FBgn0016053	pgc	30.2765	0	11.777	2.06676	11.0301
FBgn0016054	phr6-4	4.56333	0.571278	0.850608	0.7204	1.6764
FBgn0016059	Sema1b	53.8979	27.8022	23.8838	27.3736	33.2394
FBgn0016061	side	7.88964	7.58054	10.5535	11.1525	9.29405
FBgn0016070	smg	65.7931	5.18359	15.8771	5.79927	23.1633
FBgn0016075	vkg	53.2976	24.5457	32.783	18.645	32.3178
FBgn0016076	vri	66.3547	28.0872	29.6425	33.5659	39.4126
FBgn0016078	wun	40.7785	17.9517	16.6392	16.068	22.8593
FBgn0016081	fry	17.4672	7.41142	14.5227	10.5772	12.4946
FBgn0016119	ATPsynCF6	762.606	323.337	195.247	175.594	364.196
FBgn0016120	ATPsynD	794.188	366.881	226.364	189.315	394.187
FBgn0016122	Acer	13.0177	2.79198	4.44101	1.94321	5.54847
FBgn0016123	Alp4	22.721	10.259	6.99192	6.99483	11.7417
FBgn0016126	CaMKI	42.9454	25.6304	35.123	20.1798	30.9697
FBgn0016131	Cdk4	11.4272	3.17495	4.71676	3.66469	5.7459
FBgn0016641	PTP-ER	16.1831	6.0873	5.83357	4.96848	8.26811
FBgn0016650	Lgr1	5.3096	2.54765	4.02646	2.70671	3.64761
FBgn0016660	H15	5.91009	4.57467	4.30604	3.37834	4.54229
FBgn0016672	Ipp	41.2576	29.08	37.1788	37.2308	36.1868
FBgn0016675	Lectin-galC1	0.606067	0.184093	0	0.060572	0.212683
FBgn0016684	NaPi-T	0.423261	0.109879	0.217787	0.0521632	0.200773
FBgn0016685	Nlp	139.027	18.0345	34.0508	20.2794	52.8479
FBgn0016687	Nurf-38	197.972	78.8314	81.6184	63.6995	105.53
FBgn0016691	ATPsynO	842.261	341.792	192.029	215.076	397.789
FBgn0016693	Past1	83.2749	39.7239	29.9066	29.6237	45.6323
FBgn0016694	Pdp1	110.334	1085.39	1066.25	975.286	809.315
FBgn0016696	Pitslre	76.6002	100.641	144.345	123.024	111.153
FBgn0016697	Prosalpha5	177.403	56.6662	54.9745	44.0435	83.2718
FBgn0016698	Ptpa	16.1862	4.81612	4.21849	3.62795	7.21219
FBgn0016701	Rab4	90.9856	44.4214	36.4372	32.6407	51.1212
FBgn0016715	Reg-2	19.1622	10.3753	7.5111	6.28863	10.8343
FBgn0016726	RpL29	1412.63	514.38	379.294	322.487	657.198
FBgn0016754	sba	10.5263	5.64898	6.87899	5.97501	7.25732
FBgn0016756	Usp47	84.1584	35.0294	33.4158	28.5561	45.2899
FBgn0016762	angel	6.37847	1.97124	2.77664	2.6006	3.43174
FBgn0016794	dos	12.7794	3.25106	4.17402	3.81057	6.00376
FBgn0016797	fz2	14.0229	42.963	40.9948	43.2643	35.3113
FBgn0016917	Stat92E	49.2621	22.7721	21.2774	15.4931	27.2012
FBgn0016919	nompB	6.98838	3.84171	6.05954	2.96853	4.96454
FBgn0016920	nompC	5.04889	3.67002	5.39932	4.21242	4.58266
FBgn0016926	Pino	179.457	75.2928	54.1712	65.9445	93.7164
FBgn0016930	Dyrk2	9.24515	3.34059	4.12918	3.23465	4.98739
FBgn0016970	l(2)k10201	9.15515	3.11117	3.79911	2.39413	4.61489
FBgn0016974	swaPsi	0.360528	0	0.0655183	0.0524245	0.119618
FBgn0016975	stnB	10.5083	9.7689	13.357	9.31271	10.7367
FBgn0016976	stnA	1.21157	1.54051	4.19898e-05	1.06897	0.955273
FBgn0016977	spen	19.8835	40.5212	43.9438	48.6692	38.2544
FBgn0016978	snRNP-U1-70K	27.3243	8.57834	12.7537	8.11413	14.1926
FBgn0016983	smid	38.8503	10.5882	10.6259	7.68375	16.937
FBgn0016984	sktl	36.7386	19.092	18.1521	14.7746	22.1893
FBgn0017414	cag	13.0753	3.50305	5.85936	4.68097	6.77967
FBgn0017418	ari-1	32.1499	23.286	24.7328	20.2749	25.1109
FBgn0017424	asRNA:CR11538	0	0	0	0	0
FBgn0017429	CG5989	21.4088	7.47909	8.11072	6.09312	10.7729
FBgn0017430	Nelf-E	7.76989	2.65579	2.34515	1.69977	3.61765
FBgn0017448	CG2187	3.1451	0	1.38343	0.180683	1.1773
FBgn0017456	Ubc84D	0.53773	0	0.29273	0.0697957	0.225064
FBgn0017457	U2af38	38.1759	10.1634	10.9669	7.06101	16.5918
FBgn0017482	T3dh	9.81209	4.057	3.16168	2.91401	4.9862
FBgn0017545	RpS3A	1388.22	363.408	306.938	285.615	586.045
FBgn0017550	Rga	40.5833	17.329	28.9221	20.2101	26.7611
FBgn0017551	Rca1	9.60753	1.69723	2.71839	1.64348	3.91666
FBgn0017556	Prosalpha4T2	0.141824	0.0939085	0	0.114195	0.0874819
FBgn0017558	Pdk	57.58	95.0497	96.5901	119.991	92.3027
FBgn0017561	Ork1	3.67139	0	1.80608	0.433844	1.47783
FBgn0017566	ND-75	333.05	146.886	139.353	94.3631	178.413
FBgn0017567	ND-23	412.628	187.326	178.322	110.36	222.159
FBgn0017572	Mo25	47.8373	35.8208	31.091	28.9772	35.9316
FBgn0017577	Mcm5	14.9785	0.226854	3.26091	0.611515	4.76944
FBgn0017578	Max	41.8443	22.7501	20.7199	14.8119	25.0315
FBgn0017579	RpL14	1197.13	381.065	225.095	265.665	517.239
FBgn0017581	Lk6	577.469	3261.6	3196.37	4243.01	2819.61
FBgn0017590	klg	8.33498	33.8768	32.3671	39.4475	28.5066
FBgn0019624	COX5A	1118.1	585.562	379.69	286.206	592.389
FBgn0019637	Atu	23.4731	6.06539	6.1587	4.96977	10.1667
FBgn0019643	AANAT1	395.361	190.168	150.581	120.086	214.049
FBgn0019644	ATPsynB	826.628	366.752	209.234	225.639	407.063
FBgn0019650	toy	9.38245	8.48474	11.8607	15.7737	11.3754
FBgn0019660	lncRNA:roX2	0.297722	0	0	0	0.0744305
FBgn0019661	lncRNA:roX1	11.715	64.086	63.4371	101.229	60.1168
FBgn0019662	qm	22.8728	8.65065	10.4738	17.3759	14.8433
FBgn0019686	lok	29.5138	4.23427	10.8122	3.46017	12.0051
FBgn0019809	gcm2	0	0	0	0	0
FBgn0019828	dj	0	0	0	0	0
FBgn0019830	colt	70.9192	24.3406	15.6076	19.2203	32.5219
FBgn0019890	Smg5	35.6225	16.9983	20.2623	17.1698	22.5132
FBgn0019925	Surf4	100.68	47.4233	49.4498	32.4082	57.4903
FBgn0019928	Ser8	0.479145	0.239391	0.0792153	0.47384	0.317898
FBgn0019929	Ser7	68.3856	30.2833	24.2694	18.6806	35.4047
FBgn0019932	SamDC	21.6302	6.83681	6.61534	5.32016	10.1006
FBgn0019936	RpS20	1046.32	339.823	252.553	234.228	468.231
FBgn0019938	RpI1	6.68883	2.03762	3.42755	1.60412	3.43953
FBgn0019940	Rh6	0.0571478	0	0.788163	0.199196	0.261127
FBgn0019949	Cdk9	14.8513	3.05454	4.23503	3.97866	6.52988
FBgn0019952	Orct	6.10785	2.81742	1.64507	2.03827	3.15215
FBgn0019957	ND-42	246.226	88.2735	64.2952	63.6727	115.617
FBgn0019960	Mitofilin	111.781	44.4715	35.734	30.0306	55.5043
FBgn0019968	Khc-73	22.6807	12.7643	13.808	9.79955	14.7631
FBgn0019972	Drice	18.6997	4.93502	5.9649	4.87776	8.61935
FBgn0019982	Gs1l	78.12	40.3288	32.5021	25.5828	44.1334
FBgn0019985	mGluR	0.133838	0.0571356	0.0645752	0.0758865	0.0828588
FBgn0019990	Gcn2	9.59051	3.32671	3.80955	3.04861	4.94385
FBgn0020018	Ppox	18.6091	7.81663	4.29253	4.55836	8.81916
FBgn0020224	Cbl	27.819	70.9724	74.7031	92.0686	66.3908
FBgn0020235	ATPsyngamma	569.774	189.033	139.151	142.117	260.019
FBgn0020236	ATPCL	93.7929	38.6245	34.2799	27.1391	48.4591
FBgn0020238	14-3-3epsilon	329.971	146.878	198.767	100.696	194.078
FBgn0020248	stet	3.31026	0.151679	1.66556	0.335479	1.36574
FBgn0020249	stck	98.4825	45.232	54.47	35.6282	58.4532
FBgn0020251	sfl	6.81236	3.62797	3.86292	3.8643	4.54189
FBgn0020255	Ran	251.933	237.65	339.216	195.624	256.106
FBgn0020257	Ppa	14.9667	27.8773	21.2218	39.0319	25.7744
FBgn0020258	ppk	4.54603	1.89975	2.05789	1.85287	2.58913
FBgn0020261	pcm	8.73102	2.82657	4.75198	2.84697	4.78913
FBgn0020269	mspo	7.83273	19.8045	19.0446	21.2692	16.9878
FBgn0020270	mre11	9.8097	2.27472	2.69543	2.0498	4.20741
FBgn0020272	mst	5.27966	1.97488	1.13463	1.32825	2.42936
FBgn0020277	lush	3.13847	0.164793	1.84103	0.285785	1.35752
FBgn0020278	loco	18.7086	7.98966	9.53144	9.05971	11.3224
FBgn0020279	lig	62.2407	22.5302	34.2478	20.1622	34.7952
FBgn0020280	laf	0	0	0	0	0
FBgn0020294	ko	12.7735	8.47409	11.3412	7.04657	9.90884
FBgn0020299	stumps	13.5878	8.23971	9.28348	6.6688	9.44495
FBgn0020300	geko	10.1675	4.79186	3.72073	3.81973	5.62495
FBgn0020304	drongo	65.0572	38.7184	34.6948	39.9595	44.6075
FBgn0020305	dbe	19.5045	7.35819	6.32051	4.2185	9.35042
FBgn0020306	dom	28.8197	7.73375	13.2467	9.74695	14.8868
FBgn0020307	dve	1.05555	0.816332	0.524438	0.585289	0.745402
FBgn0020309	crol	35.9123	49.3612	49.6754	54.4945	47.3608
FBgn0020312	Tmtc3	9.31867	3.22067	2.48805	2.45793	4.37133
FBgn0020369	Rpt6	110.079	40.7338	30.4832	29.0308	52.5817
FBgn0020370	TppII	36.3349	11.4809	14.6477	10.5614	18.2562
FBgn0020371	Tim17b2	0	0	0	0	0
FBgn0020372	TM4SF	23.8494	7.78688	10.8352	9.26796	12.9349
FBgn0020376	Sr-CIII	0	0	0	0	0
FBgn0020377	Sr-CII	3.25485	0	0	0	0.813712
FBgn0020378	Sp1	88.2483	654.513	709.04	974.612	606.603
FBgn0020379	Rfx	10.7357	6.40018	9.27283	5.09636	7.87627
FBgn0020381	Dredd	25.011	11.2375	15.4687	9.32465	15.2605
FBgn0020385	pug	14.6603	6.07279	5.16594	4.27893	7.54449
FBgn0020386	Pdk1	55.474	39.8398	42.5584	28.4605	41.5832
FBgn0020388	Gcn5	30.0797	10.3161	11.043	11.2932	15.683
FBgn0020389	Papss	9.43633	3.90263	3.95567	2.87307	5.04192
FBgn0020391	Nrk	2.01888	0.82035	1.11362	0.699549	1.1631
FBgn0020392	Nmt	26.3115	5.57097	7.40069	4.18605	10.8673
FBgn0020399	Mst89B	0.0316741	0	0	0.0276738	0.014837
FBgn0020407	asun	5.64204	1.58282	2.13469	1.43355	2.69827
FBgn0020412	JIL-1	22.2285	65.3747	72.6403	81.0432	60.3217
FBgn0020414	Idgf3	144.088	61.628	32.584	47.3891	71.4223
FBgn0020415	Idgf2	277.595	100.365	54.5684	83.6437	129.043
FBgn0020416	Idgf1	12.3054	4.34536	2.67338	5.40587	6.1825
FBgn0020429	GluRIIB	0.126561	0.0109179	0.117583	0	0.0637655
FBgn0020440	Fak	15.3072	10.1411	10.7568	11.7172	11.9806
FBgn0020443	eRF3	44.0636	20.625	18.765	12.6485	24.0255
FBgn0020445	E23	6.41352	1.24534	2.68239	1.4993	2.96014
FBgn0020493	Dad	45.0377	47.2595	55.7439	51.6169	49.9145
FBgn0020496	CtBP	92.9707	210.942	238.472	265.139	201.881
FBgn0020497	emb	37.4928	22.338	30.7954	29.3434	29.9924
FBgn0020503	CLIP-190	419.546	736.703	774.475	1061.51	748.059
FBgn0020506	Amyrel	0.102432	0	0.259476	0.0445178	0.101606
FBgn0020508	Ag5r2	0.104883	0.282733	0	0	0.096904
FBgn0020509	Acp62F	1.05681	0	0	0	0.264203
FBgn0020510	Abi	25.8581	10.6543	13.9553	8.19352	14.6653
FBgn0020513	Paics	13.9284	4.1141	10.5898	3.5611	8.04835
FBgn0020518	snoRNA:Me28S-G764	0	0	0	0	0
FBgn0020521	pio	143.948	63.881	68.9678	59.6677	84.1161
FBgn0020545	kraken	65.4322	25.2885	21.635	24.2204	34.144
FBgn0020546	lncRNA:iab4	0.105344	0	0	0	0.026336
FBgn0020556	lncRNA:bxd	1.05593	0	0	0	0.263983
FBgn0020616	SA	15.4008	6.18961	6.242	5.32725	8.28992
FBgn0020617	Rx	1.96389	1.77997	1.84738	1.66719	1.81461
FBgn0020618	Rack1	1078.25	369.27	277.635	250.794	493.987
FBgn0020620	RN-tre	23.5787	14.8927	20.2903	15.8134	18.6438
FBgn0020621	Pkn	23.6915	10.9088	12.8664	8.71978	14.0466
FBgn0020622	Pi3K21B	9.70478	5.36768	5.53125	3.06159	5.91632
FBgn0020626	Osbp	44.4898	19.2595	17.0485	13.5976	23.5989
FBgn0020633	Mcm7	20.0161	0.133503	2.7426	0.51869	5.85272
FBgn0020637	Lcp65Ag2	0.290221	1.09372	0	0.178906	0.390712
FBgn0020638	Lcp65Ag1	0	0	0	0.0969885	0.0242471
FBgn0020639	Lcp65Af	0	0	0	0	0
FBgn0020640	Lcp65Ae	0	0	0	0	0
FBgn0020641	Lcp65Ad	0	0	0	0	0
FBgn0020642	Lcp65Ac	0.108049	0	0	0	0.0270123
FBgn0020643	Lcp65Ab2	0	0	0	0	0
FBgn0020644	Lcp65Ab1	0	0	0	0	0
FBgn0020645	Lcp65Aa	0	0	0	0	0
FBgn0020646	Lcp65APsi	0	0	0	0	0
FBgn0020647	KrT95D	70.7169	85.0778	85.6721	116.811	89.5694
FBgn0020653	Trxr-1	216.407	85.3905	61.756	58.3544	105.477
FBgn0020655	ArfGAP1	25.3125	7.00131	7.95825	7.34389	11.904
FBgn0020660	eIF4B	97.4716	53.7199	57.9324	36.2517	61.3439
FBgn0020762	Atet	48.4205	27.7569	24.7425	21.1217	30.5104
FBgn0020764	Alas	90.5429	38.204	27.7197	21.8604	44.5817
FBgn0020765	Acp65Aa	0.242131	1.19574	0	0	0.359468
FBgn0020767	Spred	19.2797	23.3693	22.9887	23.0398	22.1694
FBgn0020880	CG7179	0	0	0	0	0
FBgn0020887	Su(z)12	13.3077	5.43528	7.40372	4.35894	7.62641
FBgn0020906	Jon25Bi	2.76156	0.275342	1.97423	0.0454338	1.26414
FBgn0020907	Scp2	0.699359	0.195723	0.0231483	0.111108	0.257335
FBgn0020908	Scp1	1576.33	601.236	363.989	264.375	701.482
FBgn0020909	Rtc1	11.7606	4.28949	2.34477	2.18549	5.14509
FBgn0020910	RpL3	1045.95	288.252	214.432	255.969	451.151
FBgn0020912	Ptx1	0.020668	0	0	0	0.005167
FBgn0020930	Dgkepsilon	23.7088	9.24767	6.90772	7.64223	11.8766
FBgn0021738	Crg-1	0.200371	0.411901	0.097426	0.438303	0.287
FBgn0021742	C901	0	0	0.0144682	0.0521669	0.0166588
FBgn0021750	SerRS-m	9.90475	3.77842	3.65407	2.77336	5.02765
FBgn0021760	chb	20.8156	9.1144	8.40788	6.83114	11.2923
FBgn0021761	Nup154	11.7137	2.2764	5.23236	2.57148	5.44848
FBgn0021764	sdk	11.3764	5.31768	7.28429	4.22117	7.04988
FBgn0021765	scu	144.139	78.4032	131.084	53.1584	101.696
FBgn0021767	org-1	0	0	0	0	0
FBgn0021768	nudC	26.9115	6.80156	9.08646	7.2772	12.5192
FBgn0021776	mira	7.34792	0.415531	0.637137	0.274843	2.16886
FBgn0021795	Tapdelta	105.598	50.3368	38.2862	31.8583	56.5198
FBgn0021796	Tor	11.6807	4.93248	5.41791	4.74637	6.69436
FBgn0021800	Reph	45.6475	208.225	230.307	299.243	195.856
FBgn0021814	Vps28	59.109	30.1642	19.0954	19.5904	31.9898
FBgn0021825	DCTN2-p50	54.3481	24.5049	21.9977	16.5899	29.3602
FBgn0021847	Ttc7	19.8153	7.25225	10.3785	8.19633	11.4106
FBgn0021856	l(2)k14505	36.016	11.5101	12.087	9.46534	17.2696
FBgn0021872	Xbp1	238.029	98.5782	56.9809	75.0299	117.154
FBgn0021874	Nle	10.3872	2.42087	2.22142	2.62472	4.41355
FBgn0021875	Zfrp8	12.5258	8.80595	5.67925	3.92733	7.73458
FBgn0021895	ytr	40.5964	20.8861	20.3952	11.9155	23.4483
FBgn0021906	RFeSP	763.897	365.551	224.656	208.656	390.69
FBgn0021944	Coprox	31.6756	15.0695	10.6079	8.24519	16.3995
FBgn0021967	ND-PDSW	253.221	114.512	83.907	88.5268	135.042
FBgn0021979	l(2)k09913	150.46	49.7544	55.7456	53.4375	77.3494
FBgn0021995	Rs1	19.0242	4.63517	7.29428	5.33835	9.073
FBgn0022023	eIF3h	200.81	73.287	51.5134	52.2195	94.4575
FBgn0022027	Vps25	47.6466	27.1121	22.5744	13.8831	27.8041
FBgn0022029	l(2)k01209	21.6653	8.60529	9.49084	7.31645	11.7695
FBgn0022069	Nnp-1	17.2631	3.24576	3.25447	2.40936	6.54317
FBgn0022097	Vha36-1	155.836	89.5656	67.9866	51.5473	91.2339
FBgn0022153	l(2)k05819	11.7917	4.67367	6.12275	4.27276	6.71522
FBgn0022160	Gpo1	234.177	84.9652	93.425	67.2731	119.96
FBgn0022213	Cse1	20.0954	3.97063	9.32039	3.63328	9.25493
FBgn0022224	ubl	57.1787	30.5951	22.241	16.1537	31.5421
FBgn0022238	lolal	100.762	106.54	126.679	75.5389	102.38
FBgn0022288	l(2)09851	18.1517	4.63352	5.61283	3.19204	7.89752
FBgn0022338	dnk	37.2555	4.9771	9.25903	5.9727	14.3661
FBgn0022343	CG3760	56.5239	25.7583	23.7621	16.4654	30.6274
[truncated: 15,669 more rows]
