# Supplementary material for: Sugar sensation and mechanosensation in the egg-laying preference shift of Drosophila suzukii
Source: eLife. 2022 Nov 18;11:e81703. doi: 10.7554/eLife.81703 (PMC9674340; doi:10.7554/eLife.81703)
Supplement: Supplementary file 2. [file elife-81703-supp2.xlsx]

## Sheet: Sheet1
tracking_id	Dmel_Lab_rep1	Dmel_Lab_rep2	Dmel_Lab_rep3	Dmel_Leg_rep1	Dmel_Leg_rep2	Dmel_Leg_rep3	Dmel_Leg_rep4	Dsuz_Lab_rep1	Dsuz_Lab_rep2	Dsuz_Lab_rep3	Dsuz_Leg_rep1	Dsuz_Leg_rep2	Dsuz_Leg_rep3	Dsuz_Leg_rep4
140up	28.1413	21.5211	26.3784	41.8943	28.74	31.0803	25.6865	20.5274	15.6494	14.9612	30.9281	13.5662	13.2635	24.4499
26-29-p	210.572	227.695	256.648	429.866	207.226	389.811	162.115	710.485	697.992	673.756	393.399	225.36	215.467	264.775
4E-T	30.5513	54.407	57.7618	52.6723	37.0146	45.7945	36.8927	32.9301	34.4284	34.8012	40.1625	60.1157	51.1859	79.766
7B2	53.2076	63.5495	67.9814	99.6164	72.4727	87.9623	75.471	33.1834	27.9354	28.3379	67.9547	52.4273	59.7528	108.977
AANATL2	2.0229	1.88084	3.09027	2.49177	2.24048	1.15302	3.37368	0.353708	0.692786	0.335621	4.0524	0	0	0.540826
ACC	140.938	161.626	160.593	89.0114	79.5201	102.866	75.1812	103.537	114.709	108.371	75.1047	82.7552	85.7839	120.927
AGBE	63.1807	70.6025	78.6524	136.799	85.6029	70.8979	63.6873	62.9523	75.5752	81.6938	148.466	100.903	138.634	146.485
AGO1	63.034	86.6661	85.9375	81.8733	559.889	715.408	759.573	58.2232	64.1232	68.4216	55.265	98.4733	110.023	106.555
ALiX	126.982	147.098	143.401	158.377	101.98	114.652	99.5447	198.513	181.21	184.716	175.811	151.739	160.507	243.197
AMPdeam	117.573	111.802	124.139	206.105	211.968	263.243	209.373	74.7706	85.5869	83.6722	145.088	146.239	172.129	252.64
AP-1-2beta	92.807	103.891	104.758	109.588	81.577	78.1883	62.8758	96.7716	99.9036	98.7638	100.933	74.922	86.0838	145.039
AP-1gamma	52.1455	63.1436	65.4605	71.0218	98.3013	196.231	125.933	99.7335	102.738	98.7403	80.3736	502.49	466.456	143.314
AP-1mu	87.6241	86.7419	93.5664	112.313	54.3396	67.3992	54.7393	3.09772	0.481532	0.489887	3.50521	0.367862	0.201911	2.03932
AP-2alpha	42.5216	46.6017	49.1799	67.0819	50.0248	56.3583	43.9296	58.0633	59.9462	56.1928	84.4928	91.09	87.9904	141.95
AP-2mu	70.087	79.4255	80.3877	108.383	62.1081	72.4602	61.2544	86.9654	83.9845	80.4719	92.5535	65.7271	81.0678	155.515
AP-2sigma	89.6753	80.232	83.9413	125.279	77.8173	51.6143	61.2396	85.4034	80.6117	73.3425	153.214	74.7158	71.0273	138.228
APC4	7.62479	9.57248	10.7046	13.2317	6.71278	9.54889	8.5252	7.64568	7.55701	7.1605	12.7665	11.0368	8.27131	14.2714
APP-BP1	16.4788	14.6634	17.5064	23.0836	10.7748	17.9931	13.6287	12.5254	12.1849	12.0577	22.7429	29.9907	18.113	27.781
AQP	12.6652	17.0235	24.8067	187.311	84.4566	85.3375	97.5142	9.75123	15.155	15.6653	201.069	89.566	77.3091	135.517
ATP7	54.1082	61.5263	63.3739	38.0862	25.5351	27.6913	20.8038	17.2525	19.6895	19.1019	36.4146	40.3017	39.0678	54.8901
ATPCL	167.672	162.005	173.443	228.199	155.802	159.912	129.098	287.935	275.404	282.448	316.91	266.795	303.247	431.596
ATPsyn-Cf6	790.668	682.211	653.644	1751.5	1196.93	777.363	736.049	552.634	614.223	635.351	1608.92	715.122	863.645	1223.33
ATPsyn-beta	1855.74	2054.88	2204.39	4670.67	2780.44	1929.28	2002.02	2448.23	2635.55	2626.54	6680.54	4103.34	4225.68	6080.87
ATPsyn-d	759.102	799.819	819.428	1477	1235.69	802.921	683.956	658.125	691.368	676.351	1941.09	1018.39	1031.02	1459.53
ATbp	5.63076	5.0077	5.06277	11.1703	10.0822	12.4709	10.768	5.50738	5.38371	6.44948	8.1645	9.68604	6.50243	8.87387
Aatf	17.1828	14.5507	18.1335	34.7128	14.2968	18.1539	11.4484	9.77164	8.51114	9.38412	16.7862	11.1175	9.06071	20.8451
Aats-ala	60.1163	60.5608	63.7687	64.6311	45.1298	46.7017	32.3371	60.6349	65.5643	68.8865	64.396	46.0747	51.5118	67.4056
Aats-ala-m	19.45	20.91	22.0489	27.4877	16.6575	16.805	16.4177	13.3618	14.8911	14.4795	20.7786	17.2019	14.6524	18.4861
Aats-arg	30.8507	34.1318	32.6078	40.5104	20.0734	16.2111	20.163	42.8479	40.1585	37.682	42.3745	29.4542	26.9067	41.9458
Aats-asn	74.8753	82.7146	81.1732	74.8292	55.7953	40.616	37.9594	67.1087	67.2819	72.503	70.8104	57.929	58.6068	79.2755
Aats-asp	74.4901	76.9746	83.4326	85.7829	57.9487	51.4586	46.5683	88.8942	104.296	100.021	96.107	90.459	109.459	110.648
Aats-gln	47.7919	45.3848	48.659	64.6652	32.968	24.1918	25.9766	30.524	29.9065	27.651	37.4735	21.7488	20.1661	35.8346
Aats-gly	50.991	54.239	57.8321	57.7397	30.1723	29.1861	28.8339	33.3847	43.269	39.6059	33.1928	19.2498	23.6073	29.2103
Aats-his	62.8592	72.5489	79.062	93.9361	91.9371	145.791	125.641	106.374	112.751	109.525	136.978	788.047	781.465	187.831
Aats-leu	17.3112	17.135	17.1621	23.503	13.9225	14.166	15.1502	7.75207	7.34845	7.11096	10.9565	9.70287	8.97412	10.7827
Aats-lys	47.0876	46.4667	52.9946	97.9125	44.0524	100.476	37.5784	66.3345	76.8606	70.0843	87.6604	62.2713	66.954	97.8839
Aats-pro	8.81347	9.71879	9.16091	12.7412	5.89961	6.52537	7.10684	3.38542	2.84177	3.94956	5.93453	3.91483	2.44176	4.58236
Aats-tyr	51.6014	63.7906	66.8771	74.8924	44.3232	37.883	30.2591	52.0975	49.6333	52.2943	56.4368	31.2061	26.3799	32.1395
Aats-tyr-m	16.8609	18.6914	20.0579	26.2517	13.6457	12.8053	14.0299	6.24426	6.77226	4.83697	13.506	12.8749	9.43313	15.0818
Aats-val	45.6802	48.6462	52.1055	39.6963	28.7184	32.9333	25.2863	72.9951	83.6308	84.5745	53.1426	46.0784	53.3182	84.0441
Ac13E	72.7873	90.1465	88.4166	49.6988	374.174	386.946	474.026	41.7438	40.9714	39.5482	11.0169	18.952	16.2424	22.3822
Ac3	3.44109	4.72238	4.52681	5.43732	5.07997	10.7925	6.28598	2.02329	1.7897	2.32238	4.65275	3.34831	4.78594	5.76319
Acam	0	0	0	0	0	0	0	0	0	0.12386	0	0	0	0
Ace	87.7808	106.036	102.145	65.4718	73.6357	75.8174	68.5674	53.2952	59.1104	60.1589	28.6895	45.9456	47.1434	58.4958
Acer	19.9483	22.2336	22.9462	32.5092	12.8028	21.5167	8.9451	59.915	68.1846	68.6614	292.191	341.349	322.915	576.768
Ack	49.8554	52.3815	52.9129	53.9621	28.8277	26.9245	35.9039	31.0948	33.8835	31.3857	28.1474	21.558	18.3815	31.8672
Acn	81.7641	73.9764	82.0921	120.785	60.302	167.302	81.4505	56.001	52.8055	49.901	91.9908	145.449	147.294	175.375
Acp26Ab	0	0	0	0	0	0	0	0	0.466877	0.395814	0	0	0	0
Acp32CD	0	0	0	0	0	0	0	0	0	0	0	0	0	0
Acp53C14b	0	0	0	0	0	0	0	0	0	0	0	0	0	0
Acsl	286.293	302.133	295.86	348.804	268.313	262.586	233.868	497.879	493.167	458.283	675.136	745.555	670.492	1140.74
Act42A	37.519	36.5955	44.0773	130.035	53.7359	90.461	39.0198	141.569	141.686	136.774	158.157	107.336	99.2977	152.489
Act57B	737.43	757.511	1336.47	898.646	637.215	405.182	351.826	593.638	701.162	693.486	2801.57	1466.83	1537.73	2761.16
Act5C	1301.49	1604.94	1424.57	1775.21	1210.61	1584.67	993.07	1483.79	1599.62	1635.22	1380.15	1226.78	1414.3	1866.01
Act79B	2.87757	2.86562	6.03587	6704.12	4203.85	2848	2064.95	0.204679	3.32168	0.631194	11411.7	6549.98	7282.23	7793.76
Act87E	67.4016	56.702	102.509	2383.42	2174.97	1166.15	1107.29	44.006	52.5168	57.4868	2600.07	1652.33	1682.78	2722.66
Act88F	0.221351	0.18791	0.253609	176.594	60.6004	34.4433	23.1277	0.0710034	0.238405	0.75794	149.77	6.67802	10.6213	9.11953
Actn	125.121	134.815	189.222	749.047	442.444	463.717	353.149	84.3243	102.434	103.898	941.557	889.351	905.734	1025.77
AdSL	23.662	27.9091	30.9663	34.04	18.9486	14.4238	10.706	32.4075	41.5209	36.3391	39.5581	28.8255	37.7095	45.0489
AdSS	467.762	623.323	589.295	445.065	195.689	239.739	271.706	488.251	627.298	580.865	324.03	267.862	274.858	364.944
Ada	5.49503	4.08829	5.71576	9.75071	4.06878	4.53972	3.17146	2.14484	1.35031	1.85345	1.95026	0	0.808853	1.93257
Ada2a	9.1292	10.9792	10.4945	11.3413	8.6998	16.7812	7.28272	1.31831	1.27055	1.1814	1.74034	1.46115	3.52304	2.23968
Adam	179.945	166.905	178.431	207.174	148.328	169.15	150.272	174.957	137.723	136.75	244.061	187.804	175.506	263.06
Adar	30.0912	31.8055	35.0045	61.6749	58.6426	83.9366	61.8026	21.4534	23.1944	23.1976	52.5451	99.1691	92.6539	95.7133
AdenoK	59.4658	71.7805	75.0141	80.2201	47.2255	53.7292	49.7076	50.4261	69.4236	61.8205	69.399	46.581	53.2723	65.0765
Adgf-A	718.878	904.067	745.753	7.32518	3.42757	5.01835	2.89905	803.975	860.791	840.403	15.1819	13.4904	9.80014	14.6876
Adgf-D	8.91135	8.19838	9.38376	5.36077	1.60672	4.25244	1.64518	4.92824	4.79697	5.74578	12.5471	4.48269	7.10454	4.62944
Adgf-E	0	0	0	0	0	0	0	0	0	0.0338429	0	0	0	0
Adh	693.46	718.202	1044.53	5293.14	3628.48	2576.82	2308.36	412.268	434.496	541.654	2401.82	1164.55	996.58	1385.19
Adhr	2.0654	2.01312	1.68277	24.4741	16.7542	13.8653	16.6105	0.181883	0.0763374	0	0.578837	1.36074	2.56072	0.208577
AdipoR	262.899	299.444	327.264	300.629	287.205	248.009	268.618	371.416	412.58	404.817	280.79	274.933	278.937	338.04
Adk3	33.5224	35	37.8779	60.327	64.7874	68.5221	52.6295	37.3659	27.4698	25.3211	55.4435	62.3199	70.576	69.3239
Ady43A	16.2591	24.5166	24.0737	43.3425	29.7507	35.1899	28.1398	36.9093	35.7352	38.2555	71.1896	58.1257	62.1263	60.9243
Afti	13.9517	18.1243	19.8637	23.2094	15.3911	21.7598	16.1937	19.8388	18.6697	18.1722	19.8631	27.1591	33.0832	31.4132
Ahcy13	67.7193	79.6083	89.6621	120.26	60.6798	74.7813	45.3199	33.0224	53.1414	43.4862	36.7351	28.8706	24.9215	44.965
Ak6	17.0023	16.6542	17.2187	20.072	17.5142	16.6712	17.4892	28.0846	18.2672	15.1729	30.3231	36.145	14.2324	45.3588
Akh	0.26338	0.223589	0.24141	0.717151	0	3.60292	1.84485	0.328011	0	0	0.417554	0	0	0
AkhR	20.713	30.9411	28.8008	3.90062	4.18763	3.61409	3.50925	5.76084	6.40023	6.2701	2.80398	3.62179	2.0873	5.24619
Ald	1521.68	1702.89	1965.41	3672.21	3693.94	3678.11	2982.69	1851.21	2328.03	2660.11	4857.07	6345.59	6059.03	5169.6
Aldh	796.63	849.683	934.171	1231.7	821.93	590.539	588.299	179.932	193.039	183.793	235.452	144.362	148.699	193.564
Alg10	19.1387	18.7257	21.1527	25.9931	12.0357	11.8067	16.2298	13.4206	16.6825	15.2	19.338	14.0384	9.04544	21.9394
Alk	3.13145	3.13603	4.88838	25.2133	42.0358	39.8039	36.6429	2.92785	1.55023	2.50032	17.183	31.1958	43.6786	27.9968
AlkB	10.9049	14.6309	16.2567	17.9179	8.50304	13.1813	8.63338	8.0673	9.99648	8.63896	14.3774	18.5581	18.7947	19.648
Als2	35.2711	42.875	39.4647	36.4483	30.0972	38.9786	29.0309	43.9456	48.239	49.0172	37.8336	40.7875	40.3454	66.8067
Amph	334.71	341.035	340.656	179.235	170.292	190.541	118.79	307.898	313.732	324.137	253.95	277.766	220.335	490.963
Amun	128.02	149.176	154.79	243.874	1017.24	1548.78	1591.78	101.335	99.3663	106.221	137.198	1959.14	1797.36	248.236
Amy-p	4.08559	4.82708	5.40485	0.630773	1.22456	0	0.688397	16.8663	12.9381	16.6194	12.486	0.443723	0.821979	1.24977
Amyrel	0.0844101	0.322458	0.193422	0.229837	0	1.15468	0.0985418	0	0	0.0740139	0	0	0	0
Andorra	0	0	0	0	0	0	0	0	0	0.0737145	0	0	0	0
Ank	92.0935	141.251	155.182	120.844	122.756	192.939	95.9704	77.8485	95.1043	97.8095	99.8574	169.775	149.855	206.971
AnxB10	435.516	553.312	532.152	571.683	456.471	388.81	387.89	204.038	208.704	208.501	415.233	377.508	425.42	541.729
AnxB9	869.462	998.099	1031.03	1055.46	874.287	766.921	665.29	864.028	756.861	754.963	841.456	722.976	745.372	949.96
Aos1	32.9084	38.0002	39.501	84.8983	29.6781	47.2977	27.9665	17.4933	18.9535	17.8236	41.3002	23.5557	31.0573	29.9584
Aph-4	32.6069	30.0517	29.6631	57.0352	48.99	37.6681	33.0123	22.6179	16.8562	11.0469	190.872	163.791	146.127	197.637
Aplip1	9.21884	10.5689	11.5297	26.744	20.3731	25.2661	25.5478	8.35206	10.6494	8.57708	40.577	36.7229	37.1186	60.1346
Aprt	30.8675	35.6182	33.113	26.771	4.8749	7.42854	9.07559	23.5949	25.533	23.2651	22.0747	13.0646	11.7568	26.2429
Aps	114.968	127.936	137.486	230.46	183.416	264.931	199.539	95.1636	106.727	95.0342	182.308	130.053	122.724	228.099
Arc1	259.186	263.771	302.44	522.831	549.995	370.215	415.999	3208.15	3798.28	3154.96	1584.15	2110.57	2405.1	1422.47
Arc2	21.7773	28.7375	32.5103	39.3355	17.9703	22.4902	28.4438	44.5416	42.9527	37.0753	50.2882	47.0381	62.99	56.7034
Arc42	103.11	112.087	115.794	103.308	72.1934	80.821	57.9375	44.0136	44.7069	44.3919	58.5279	46.5667	50.4872	53.6687
Arf102F	229.339	286.051	298.785	314.12	194.922	175.324	169.224	328.498	347.466	361.002	408.322	478.021	424.691	709.952
Arf51F	156.112	127.985	130.122	232.609	150.253	150.854	136.027	121.308	103.185	102.547	194.854	178.524	179.587	276.368
Arf79F	536.066	580.957	595.508	586.316	473.752	403.682	332.86	1204.9	976.164	1051.51	805.775	726.668	738.33	1254.97
ArfGAP1	71.0014	75.2964	80.8088	68.2765	28.2645	41.8127	34.9825	62.6143	60.2261	63.5498	40.2738	32.1077	28.9523	42.527
ArfGAP3	81.9463	82.6536	92.4896	79.0809	70.4292	91.2673	57.646	91.1432	84.8955	85.8025	64.1962	58.2491	60.4148	93.4847
Arfip	22.6239	27.4158	30.568	35.5888	19.3123	17.5388	22.3063	27.3443	29.7838	27.7546	34.5291	34.0043	36.1242	54.3081
Arfrp1	18.5183	22.3444	23.9346	34.5595	20.5676	16.8999	18.7037	24.5564	21.3684	19.3054	24.5497	23.0848	31.2242	35.827
Arl2	30.7582	28.7032	32.5458	38.7963	28.0548	30.5514	24.2906	28.9833	29.9528	28.0885	63.9643	51.6795	37.4222	73.1548
Arl6	9.27046	11.0179	11.424	18.7915	8.78448	15.1474	13.949	5.88453	4.93956	6.55468	20.0301	21.8755	15.534	25.9658
Arp1	130.874	132.335	133.703	147.514	95.3517	107.02	87.7302	167.087	164.595	157.847	208.791	188.276	209.882	263.511
Arp3	54.0584	61.5687	62.1415	93.3854	56.0549	74.0515	52.9975	67.7969	61.8539	60.1239	73.1051	75.8037	75.6915	96.1112
Arp5	13.3255	13.4657	13.45	20.2839	9.83324	11.5302	10.421	8.21391	9.17115	9.34146	17.6105	10.3329	12.2421	20.9119
Arp53D	0	0	0	0	0	0	0	0.0615022	0	0	0	0	0	0
Arp6	42.6596	45.7565	49.6432	70.1781	34.3504	37.7243	29.5392	9.79574	14.4979	14.4926	18.2125	8.54083	12.9294	14.4852
Arp8	10.6263	12.3674	12.5991	20.7672	10.8961	14.6535	10.7247	6.70181	7.71306	6.92901	11.2678	8.55921	2.22535	8.16876
Arpc2	55.7158	62.7318	78.5666	133.167	54.129	101.063	40.0269	86.1357	77.7446	77.3819	79.5775	80.0281	84.4992	146.895
Arpc3A	26.2145	36.325	34.5871	44.3317	33.4933	39.599	32.3874	41.5755	43.5628	37.5529	56.4411	52.8245	39.6538	72.016
Arpc3B	8.25106	8.62872	8.76848	7.97727	6.95323	1.02238	2.79202	1.03523	0.248281	0.526227	7.90699	2.21285	4.94508	5.42702
Arpc4	91.1547	96.8339	107.731	134.555	78.0168	62.8982	81.5469	171.587	157.536	173.352	193.465	157.19	102.724	227.34
Arpc5	51.5352	45.621	47.6154	81.2304	49.6764	54.4285	40.8596	47.5879	42.6663	40.4206	78.1662	41.1989	47.7277	81.5648
Arr1	0.0571621	1.50431	0.471546	10.7396	6.5368	9.28567	8.54174	0.352409	0.414145	2.45776	0.179445	0	0	0
Arr2	0	2.15839	0.856073	0.141284	1.40799	1.50832	0.969199	0.703585	1.1812	3.09527	0.162847	0	0	0
Ars2	83.9781	81.1063	83.0001	137.792	74.6701	166.726	78.1006	81.0461	59.4817	62.6437	93.1094	170.802	174.034	177.503
Art1	37.2977	33.9647	43.1643	99.8993	29.174	30.753	22.0941	36.2965	40.49	33.2104	52.1976	37.7718	40.8237	61.1051
Art2	0.293057	0.149269	0.0537223	1.27673	0	1.10244	0.136848	0.142933	0.11998	0.203435	0.909756	0.152762	1.7608	0.737594
Art4	4.90732	5.89896	8.85201	24.9603	2.66322	21.6158	4.8581	3.91754	6.0085	3.37302	6.4646	3.20483	6.21344	9.48411
Art7	11.5192	13.2605	13.4882	15.6417	9.70227	7.99233	10.4907	9.5433	11.6577	11.6802	22.4062	16.9067	16.5989	17.3314
Art8	9.82382	9.63464	8.33325	13.5407	8.27862	9.07729	5.69866	1.65549	1.32648	1.17813	6.70544	3.69954	2.38374	3.45175
Asap	30.6971	34.1648	34.6092	59.083	37.7449	60.8998	42.6083	30.2407	29.1252	27.4058	49.0232	61.2763	64.9251	85.8585
Asator	22.0409	25.3888	27.7377	52.6021	54.7084	99.5362	43.9355	17.5796	18.4831	20.5167	65.3428	85.3299	88.4521	124.475
AstA	0.275589	0.116977	0.631502	0.375198	1.33538	5.6549	1.28692	0	0.280737	0	0.851484	1.42978	0	0
AstA-R1	0.844956	1.16561	0.968093	3.59486	7.36972	13.3647	14.4264	0.195305	0.218589	0.277977	2.4862	4.45303	3.66625	5.67386
AstC	0	0	0	0.464385	0	0	0	0	0	0	0	0	0	0
AstC-R1	0.818496	0.621696	0.868678	0.58649	0	0.736621	0.502911	0.318484	0.311897	0.302198	0.0675711	0.680775	0	0.365227
AstCC	0	0	0	0	0	0	0	0	0	0	0	0	0	0
Asx	17.4535	21.8122	22.8194	28.3614	19.7656	25.7302	22.7042	14.3762	14.0551	14.6513	18.7508	24.7152	22.8379	30.0627
Atac1	10.7542	8.43483	10.6607	17.1874	12.1212	10.5937	6.4138	1.57666	2.16568	1.73404	3.55799	6.43399	1.00899	3.94485
Atac2	6.07543	7.94175	8.42691	10.5771	8.64931	5.37819	7.78301	4.96667	4.60795	4.30189	11.0644	9.35928	7.3031	16.4873
Atet	56.2689	59.2111	56.5724	114.093	102.324	100.45	95.936	85.7373	88.4791	86.4967	59.6183	57.0724	65.9039	84.8937
Atf-2	10.7585	12.0539	12.5141	25.2048	21.805	27.9214	17.3413	4.53489	3.63621	4.57595	8.6162	5.6425	4.76468	12.0309
Atg12	35.0533	28.1662	26.1158	57.1654	62.4914	27.886	37.2017	15.1072	14.113	11.4447	25.7452	8.8544	4.71702	22.0748
Atg16	16.5698	18.6286	19.7661	30.8132	13.621	24.3279	18.9016	9.88133	9.94655	9.48304	12.1091	10.78	11.6895	19.2778
Atg17	31.6475	37.3446	38.466	51.4988	38.5456	42.0024	36.588	46.0188	54.2042	57.0858	54.0788	93.9198	105.32	82.1848
Atg18a	54.9703	68.2179	68.8997	80.7746	42.5752	63.7964	49.612	52.7128	54.3964	57.0312	65.4317	62.3188	67.4785	95.7837
Atg2	40.5114	42.6946	44.1064	47.5295	37.832	31.2295	28.955	34.9423	36.4184	38.7016	36.1976	29.4567	29.5284	42.2907
Atg3	64.0602	69.4765	72.2404	82.4072	60.4931	62.4245	45.6367	56.552	55.9825	56.6762	72.4865	61.1914	71.932	92.5816
Atg4b	19.7791	21.6828	23.6109	35.9182	25.3564	27.3232	18.6907	8.04597	8.95286	8.2293	12.6243	8.55931	10.2083	12.9604
Atg5	26.9176	26.4624	26.7283	39.1741	59.6686	100.388	70.9754	27.8274	28.2358	23.5029	30.8824	27.4534	38.0302	43.0162
Atg6	42.3043	44.4518	45.0121	50.4793	37.2706	37.7708	34.6515	31.5405	31.7809	31.6144	45.334	38.8408	39.2509	53.7316
Atg8a	1174.31	1320.82	1185.58	1359.25	1587.16	2237.64	1226.17	2046.15	1928.93	1964.13	1796.47	2181.17	2279.83	3011.98
Atg8b	3.29444	2.20794	4.45	0	0	0	0	5.15998	4.69231	4.89613	0	0	0	0
Atg9	38.2898	47.0749	47.735	46.5978	29.3039	28.7157	29.5511	28.6925	35.8614	36.1358	40.7116	23.088	32.9201	45.2553
Atox1	124.549	140.811	135.111	136.85	89.7456	73.6631	127.953	179.826	150.334	159.185	185.645	137.503	74.6148	254.838
AttC	38.1655	28.4142	45.6598	11.9544	10.2788	5.649	5.68358	104.152	17.539	7.28296	31.8907	21.6476	22.3255	15.8925
Atxn7	12.4071	15.4988	14.5933	22.9888	8.7635	11.0657	13.6587	12.0077	13.7247	12.399	15.4188	11.5752	19.981	17.4299
Aven	12.9513	12.2563	12.7143	20.523	12.0712	8.59216	8.92306	9.84679	8.40683	8.92404	17.8917	7.5557	4.14715	16.6967
Axs	23.2227	24.6906	29.168	31.3531	20.1644	23.7926	21.7337	29.7015	33.1995	32.2806	55.4902	52.5507	58.9064	56.7826
Axud1	20.2697	21.4989	21.9366	37.8697	33.4653	60.5925	28.396	18.8662	22.6093	23.437	25.5437	30.9669	36.686	40.9657
BBS8	8.67908	9.45914	9.27517	13.8283	11.9737	23.784	14.7778	3.7223	4.58795	4.45965	13.3156	13.8988	14.2624	17.3986
BCAS2	14.52	16.2021	18.0424	34.3394	23.646	12.1582	13.8054	16.6124	17.9715	14.9832	31.5515	23.3567	35.802	35.5542
BCL7-like	3.78309	5.9643	8.29732	24.0968	23.3069	42.9717	11.0412	11.2038	8.14138	9.87725	14.6881	14.6552	4.70862	26.8469
BEAF-32	34.6293	38.8223	37.0646	84.0815	46.4564	55.694	44.8044	23.8173	29.4985	26.6076	44.5063	35.7336	24.0421	51.5337
BG642167	0.392585	0.166637	0	0	0	0	0	0	0	0	0	0	0	0
BHD	9.81546	10.8285	11.0697	13.8558	11.3972	8.58532	10.3499	6.88184	7.77993	5.88485	15.8254	6.76197	9.96241	12.9197
BI-1	349.728	435.893	425.331	338.542	275.552	230.753	213.956	453.973	363.678	390.181	364.856	1166.77	1218.5	455.616
BM-40-SPARC	85.0761	95.116	106.963	441.591	261.473	284.279	257.767	79.029	71.1103	69.1306	634.015	398.969	359.637	476.237
BRWD3	23.6782	24.9363	27.2315	46.6794	33.6073	42.178	31.2338	25.0737	24.5662	26.058	25.9311	31.6914	25.3922	43.6058
BTBD9	24.8992	24.5626	30.7731	59.6367	45.7468	53.3189	48.0428	28.2529	33.8511	35.3682	54.9933	56.2243	57.6672	80.4492
Bace	0.950859	6.93244	0.153802	51.5529	1.62616	87.9906	0.130594	0	0	0.0981537	0	0	0	0
Bap170	13.9165	15.5288	17.049	40.0579	16.4611	29.93	14.678	8.50811	10.2807	8.27414	10.3682	9.09325	7.91289	16.84
Bdbt	31.8653	26.5571	28.7405	44.7693	20.3054	20.7751	23.1015	7.8999	7.38485	7.6024	15.8846	15.735	19.2744	11.3242
Bem46	17.4828	20.9036	18.6764	30.8417	14.3179	14.7368	16.3853	27.6226	23.3136	21.43	25.3637	26.6185	20.4544	30.2053
Bet1	70.6013	81.8259	86.7179	108.467	74.7978	73.5903	81.799	161.381	172.178	165.89	145.309	138.826	158.169	174.785
Bet3	42.3154	49.319	46.0714	57.9281	34.8912	50.17	34.6618	31.3505	34.0294	34.4916	30.2756	37.743	23.7814	35.9517
BicC	0.0229912	1.30769	29.7977	95.7497	2.3618	587.148	59.4783	0.839766	8.3415	2.86857	4.45422	8.91537	8.71951	9.30912
BigH1	0.294717	1.25096	16.208	100.149	1.94218	91.6179	12.3861	0	3.56896	0.902411	0.0949541	5.42106	0	0.769851
Bin1	24.2748	23.7869	25.1743	75.9176	33.8761	33.9185	18.7847	29.8777	26.6652	24.684	52.0233	39.2733	24.4773	54.5446
Bka	21.5353	20.313	24.6975	38.5253	24.1972	20.2799	16.2747	11.4425	10.2525	11.4368	18.3305	25.2833	13.5758	14.5962
Blos1	35.5276	39.5327	33.9912	48.1759	26.0628	38.9672	30.7349	6.39622	7.69083	5.90512	20.6859	16.6283	4.86769	23.1944
Blos2	34.8092	29.1059	34.0647	50.4193	36.2704	33.7887	29.0264	42.2151	32.7514	32.8872	44.3756	24.9517	25.0459	39.242
Blos4	10.3419	12.2286	15.1217	21.958	6.44305	7.15786	12.6483	11.0075	8.11606	7.62173	10.9826	5.72325	5.2356	11.2583
BobA	0	0	0	0.363172	0	0	0	0	0	0	0	0	0	0
Brd	0	1.09034	0	4.89611	0	0	0	0	0	0	0	0	0	0
Brms1	40.9714	43.1699	45.6536	79.7325	55.1211	47.5299	46.7053	29.1411	29.6854	30.4395	56.9648	51.5215	44.6784	56.9805
Bro	0	0	0	10.1075	0	0	0	0.120684	0	0	0	0	0	0
Bsg25A	0	0	0	30.5905	0	0	0	0	0	0	0	0	0	0
Bsg25D	34.405	40.1355	42.041	70.4941	22.8813	31.6328	28.6766	25.351	25.7559	25.9631	31.0509	43.941	43.8326	36.9833
Btd	0.0752517	0.25553	0.0344872	0.2049	0.583417	0.772053	0.7028	0	0.0390479	0.0662089	0.118434	0	0	0.21338
Bteb2	0	0	0	0	0	0	0	0	0	0	0	0	0	0
Btk29A	90.0255	93.7075	90.0117	90.5725	115.502	135.765	92.2476	85.441	91.4351	88.4751	47.2157	73.2897	69.7232	68.2019
Bub3	26.4874	30.8299	30.1282	77.5964	36.37	36.3428	23.9926	28.8912	28.9435	25.3224	40.1855	39.0395	36.8523	57.6867
Buffy	88.9344	100.605	98.9291	50.9705	38.4405	52.4758	50.8558	184.177	175.571	174.166	42.8774	60.5813	46.6938	98.1946
Bug22	34.9223	33.6406	32.5843	75.0179	43.3686	40.2272	43.6985	18.7364	15.9446	16.4603	47.538	44.193	32.7463	52.7525
Burs	0	0	0	0	0	0	0	0	0	0	0	0	0	0
Bx42	53.2918	50.7624	54.8085	95.1327	52.3462	48.3273	39.7885	48.9247	58.6182	54.1897	77.0469	59.6879	67.9097	89.3073
Bzd	15.3385	16.418	17.9304	29.2959	23.8697	15.8128	17.4394	21.3733	20.978	21.5479	47.8973	49.2558	41.7285	66.8285
C1GalTA	39.7907	51.1241	54.8057	31.5399	25.1535	35.8539	23.5393	22.0901	20.5907	18.6767	54.9816	90.7723	62.0851	96.6402
C3G	20.6017	23.7179	27.2771	40.8698	100.185	141.075	132.352	16.0298	19.3779	20.2984	32.2374	53.4099	52.0423	51.7235
C901	0	0	0.0682343	0.0506753	0	0.127295	0.260722	0.046518	0	0.0993133	1.0659	0.497171	0.491194	0.853523
CAH1	1250.58	1699.23	1620.79	225.99	148.619	141.525	192.525	1038.9	1487.78	1305.45	79.5464	46.9633	47.537	85.62
CCAP	0	0	0.123041	0.365516	0	0	0.626854	0	0	0.119003	0	0	0	0
CCHa1	3.65838	3.10568	2.93407	40.7791	54.9534	64.902	56.3221	1.75896	1.07382	1.25176	15.2668	14.014	17.1662	11.7359
CCHa2	17.5942	12.2086	15.5656	0.41658	3.55842	2.8777	2.85771	6.30076	6.73141	12.7724	8.5069	0	0	0
CDC45L	7.09246	8.60138	11.9072	25.6671	7.29424	22.3992	8.61786	7.34176	11.2424	9.08791	10.9319	13.696	9.39677	17.1957
CG10005	0	0.0764654	0	0.12263	0	0	0.420615	0	0.19978	0.169372	1.51485	1.27183	0.418849	0.136465
CG10014	0	0	0.0906004	0.269144	0.38317	0	0.115395	0	0.100828	0	0	0	0	0.275491
CG10019	0.433479	0.38399	0.552795	1.0007	3.39726	2.6104	3.21234	0.307142	0.360947	0.371581	1.79855	1.57567	3.29724	2.88819
CG10026	37.6678	37.7634	41.8255	41.4167	41.024	30.9167	34.3418	15.1385	12.5588	17.2624	93.8761	96.1312	84.5994	199.998
CG10029	0	0.0430818	0.0465156	0	0	0	0	0	0	0	0	0	0	0
CG10031	197.102	193.888	186.131	209.272	113.171	104.254	129.173	70.0003	84.7029	93.3677	504.693	354.822	392.268	464.039
CG10035	0.727517	3.58212	1.6004	90.2317	1.5511	1.61722	1.35891	0.630614	0.529346	0.576998	9.63316	17.1384	14.4275	13.3269
CG10050	3.48165	4.43347	4.40694	7.90009	3.21344	3.68546	3.67745	4.11002	3.88127	3.80236	6.01682	1.53744	6.32898	6.59852
CG10051	0.264292	0.509917	0.286291	0.130843	0	0.164337	0.112197	0.0295779	0.0248281	0	0.0376523	0.569018	0	0.169594
CG10053	12.0461	10.9567	11.9734	17.3586	11.9773	13.643	8.94915	14.2461	7.89094	9.37959	23.44	9.73627	9.89211	19.7821
CG10063	0	0.0833187	0.0899596	0.13362	0	1.00695	0.229157	0.341132	0.286351	0.323688	0.434256	0.972248	0.200116	1.0432
CG10068	39.3095	38.625	40.6173	56.8342	37.7762	36.1418	31.9774	32.0014	31.5668	30.0568	64.0011	33.6814	51.0297	58.4934
CG10075	47.2375	48.9668	55.9624	101.498	58.5467	61.6791	57.0218	25.9815	28.2189	27.2406	82.0543	36.2472	54.7993	52.4251
CG10077	288.5	359.922	359.489	322.58	233.295	533.9	328.486	174.627	207.185	192.301	253.157	370.134	352.678	403.952
CG10098	39.1384	38.5795	41.7086	66.6859	37.1298	45.7585	44.8653	33.4572	37.3847	35.3256	68.479	60.1422	46.5655	71.2181
CG10104	0	0	0	0	0	0	0	0	0	0	0	0	0	0
CG10116	0.43198	0.366717	0.263964	0.588114	0.418638	0.49244	0	0	0	0	0.323536	0	0	0
CG10126	267.007	278.262	298.046	413.976	395.222	427.442	323.573	111.824	66.7433	70.1613	151.194	102.07	135.273	191.089
CG10131	7.06781	3.86915	4.35918	50.6297	22.661	22.7026	18.9698	0.407403	0.410376	0.52187	15.04	3.83171	3.58489	8.22264
CG10133	14.0908	12.521	12.4327	20.3491	15.4423	15.0872	9.99295	8.44709	6.68155	7.51418	11.787	12.6739	12.8646	6.1474
CG10139	29.5385	25.0759	29.3734	60.8282	45.1898	38.5966	26.8931	28.4532	26.2917	22.2082	39.8718	32.3718	31.9019	44.865
CG10147	10.9608	14.1545	13.5799	17.9576	11.7025	13.5803	10.844	6.78221	5.83193	5.57208	14.249	9.31126	7.56906	15.8081
CG10163	0	0.140187	0.353174	0.0749404	0	1.50598	0	0	0.0572702	0	0	0	0	0
CG10164	0	0	0	0	0	0	0	0	0	0.0481254	0	0	0	0
CG10171	7.37704	13.435	12.3675	21.031	9.04341	12.6143	9.56901	19.5969	24.675	25.3465	23.3627	17.6201	15.6018	23.0973
CG10176	184.241	209.69	188.894	110.959	89.5264	55.9517	76.1978	183.085	148.53	152.651	55.2374	51.8451	55.8324	71.8239
CG10177	0	0	0.0464024	0	0	0	0	0	0	0	0	0	0	0
CG10178	11.1494	10.9314	12.5943	69.3755	67.037	76.8636	54.5392	5.99721	4.46578	4.92186	7.38812	3.92849	8.6818	14.3649
CG10184	9.45279	10.3767	10.9549	11.4641	5.05426	11.4261	8.37168	3.68369	4.21656	4.28971	24.2137	14.746	5.89348	22.7346
CG10188	12.5414	15.2346	17.0462	23.5449	22.2132	18.2378	13.6948	16.6663	15.0875	14.5688	22.3339	18.8554	26.0677	29.877
CG10189	14.0254	14.2181	16.6698	17.6959	8.76279	11.5961	9.95613	2.92036	4.58304	4.021	8.72824	5.83529	13.9659	11.4301
CG10195	22.4785	25.4922	26.2034	38.7639	23.6834	38.6341	32.9705	10.1629	14.2579	12.7452	20.7177	12.1531	13.5079	21.4344
CG10202	0.0993967	0.0562532	0	0	0	0	0	0.0408053	0.171263	0.145195	0	0	0	0
CG10205	1293.47	1472.7	1386.51	172.747	101.722	91.806	99.5479	467.567	334.806	381.88	259.985	125.617	103.029	158.615
CG10208	13.1175	13.9516	11.4014	12.4189	4.82192	8.37906	8.97694	17.1825	18.4649	12.9669	26.6804	24.4182	20.1039	25.9836
CG10211	416.23	429.766	452.734	74.0904	71.1394	92.6733	76.1127	66.653	41.7655	47.5381	61.5145	36.0405	42.2141	50.0441
CG10214	28.4001	26.872	25.5792	50.882	16.4373	14.164	18.1892	4.34239	5.61538	4.67714	10.7568	6.52254	6.19627	17.9
CG10217	150.893	159	160.736	166.166	128.544	122.83	95.0431	97.5046	92.9311	92.3599	108.593	67.2037	80.7078	111.959
CG10219	288.554	343.662	346.639	768.577	370.492	258.826	357.418	159.588	210.492	190.524	394.79	231.747	232.843	254.981
CG10253	6.79278	7.89401	6.95153	9.92135	8.56426	12.5738	8.31499	3.88987	3.0969	3.22483	9.49512	8.57193	11.5741	10.669
CG10257	18.1605	16.1916	16.562	23.2335	17.1574	37.2953	22.1598	7.6642	10.9747	7.7803	17.2172	17.1053	24.3975	31.6664
CG10262	9.30198	10.9445	11.6672	11.8864	7.74944	11.5806	10.6688	27.2973	22.7446	19.7128	19.6185	12.2727	15.7769	24.6039
CG10264	0	0	0.14127	0.104917	0	0	0	0	0	0.0725396	11.0294	0	0	0
CG10265	5.75253	4.98735	5.66533	17.9129	9.13327	10.7782	8.14448	1.97894	1.30519	1.45861	4.76842	3.92794	1.74134	5.9166
CG10286	17.9773	16.9287	16.8439	22.0274	18.8415	12.8653	11.2708	20.3702	20.724	19.1642	31.3764	17.1556	25.8829	32.2365
CG10289	49.7394	59.1396	60.1974	72.8625	563.788	647.85	762.689	34.8211	33.3528	36.9793	44.8153	346.235	340.307	84.9095
CG10306	188.669	179.181	190.371	275.108	190.563	140.553	142.461	203.29	193.092	185.04	283.249	129.422	149.136	180.155
CG10307	22.8206	26.6248	35.0668	153.932	57.7138	61.1413	94.8827	11.2215	11.8057	12.3513	118.469	470.612	497.263	111.783
CG10311	75.5357	105.66	124.369	305.25	247.349	219.295	241.14	58.9701	50.9408	55.9546	248.043	275.112	253.41	375.514
CG10320	322.32	327.418	333.056	912.915	948.091	742.303	762.723	147.77	177.43	187.35	722.915	413.489	442.266	697.85
CG10324	7.58709	8.32758	8.99133	18.3112	10.3236	14.4805	9.2152	14.6523	11.5759	10.7178	14.4367	16.8721	10.538	16.2826
CG10326	59.4637	76.3027	78.1249	108.709	54.8635	48.9434	58.4452	40.0743	37.0357	37.0652	73.9455	77.2898	51.4584	95.6535
CG10333	29.8183	29.9979	27.1455	46.5577	27.1311	22.5938	22.1039	20.4055	16.2644	14.2107	32.887	23.2761	26.3568	41.9703
CG10336	0.677755	1.15072	3.23034	21.4994	0.525456	9.9667	3.63963	2.1668	3.21795	2.49092	5.51662	6.59116	5.86661	6.68986
CG10337	12.7105	15.4463	19.63	15.2897	14.6803	12.9513	12.3994	53.8573	36.6361	45.5951	18.611	16.085	24.2158	13.6837
CG10339	51.2412	49.329	49.086	169.495	168.338	150.162	132.933	39.8461	30.124	33.1127	109.359	124.574	135.528	230.862
CG10343	18.4735	23.854	21.745	45.271	20.3528	18.7869	15.437	28.2275	20.1656	20.7719	30.7344	31.5809	20.9277	41.3238
CG10344	16.915	14.6137	14.2006	8.967	2.75628	5.5032	3.49504	6.09604	5.65983	4.60116	7.6426	5.52811	2.92588	9.10914
CG10345	1050.9	1087.08	1116.51	5762.38	4163.21	3766.26	4325.56	863.913	890.982	787.884	6327.6	8360.92	8697.47	7109.95
CG10348	13.409	12.3972	11.6548	46.5305	40.03	39.4661	38.6849	1.34153	1.8098	1.26156	19.0902	59.9121	59.1917	30.4387
CG10352	4.62378	4.48598	5.81222	8.36335	8.19378	4.17909	4.16409	0.0807091	0	0	0.308226	0	0	0.0925543
CG10353	41.5083	45.0204	49.2484	48.6806	45.2059	53.7298	38.6575	44.8182	46.6998	46.1812	44.1617	49.7816	56.2042	53.7068
CG10362	3.99286	5.41659	4.74486	8.90522	7.62241	9.46938	8.94791	4.48471	5.06052	4.79602	10.8564	10.7911	10.6096	16.2437
CG10365	31.8699	28.9209	34.7852	125.578	68.8713	73.6631	68.253	26.6158	32.4899	33.1469	74.6826	41.868	42.882	39.1198
CG10366	13.1394	13.8741	14.848	25.2889	15.7686	17.1123	15.0451	8.60067	11.1575	10.5721	15.2064	8.54223	13.225	10.5603
CG10375	46.1195	44.9238	45.5762	80.9675	50.4903	57.0101	43.6083	32.5626	37.5199	32.5287	55.2261	57.9313	50.8992	77.6984
CG10376	26.4463	35.4509	34.0434	49.0436	36.3712	28.0141	29.8525	27.3867	26.3665	24.0629	43.9609	30.8106	33.8225	53.7209
CG10383	32.856	37.5801	39.2861	62.9419	48.662	40.2984	38.109	16.7881	19.3666	19.9044	27.8521	27.7578	24.4411	36.8411
CG10396	0.827553	1.40506	0.433441	0	0	0.808609	0	0	0	0	0	0	0	0
CG10399	8.76085	9.51536	8.97479	10.5241	4.86942	5.50755	3.30893	2.70151	3.06805	2.82724	5.66422	3.05714	3.49582	2.0957
CG10407	2.57075	4.43293	6.11168	6.67172	4.67128	3.02213	3.75143	0.297499	0.582692	0.988004	0.50495	0.423945	0	0
CG1041	90.3944	95.2283	93.5996	79.2912	49.7103	53.422	40.362	52.6909	49.6967	44.686	39.4207	28.595	28.8964	37.2562
CG10413	46.2132	52.1459	55.9374	56.2334	34.3287	40.2671	35.5711	29.5001	29.5785	27.7853	32.95	33.0691	27.1305	48.5152
CG10418	25.4065	15.8042	18.2684	34.5894	28.8668	22.8453	10.2276	7.89322	7.76801	7.55416	21.4818	4.65437	7.18503	6.55465
CG10425	32.5109	36.1682	38.3699	58.5097	36.1278	31.8726	24.5798	60.2582	55.2615	53.8071	77.3885	66.7694	58.6013	89.9463
CG10426	5.29228	5.76961	6.68903	25.635	22.7828	23.1476	17.4944	4.48917	4.5616	4.05945	20.8821	13.3475	16.3948	20.3212
CG10428	8.74962	9.23938	11.2472	23.7757	10.2718	13.8058	8.80273	2.10287	2.20647	1.74592	5.96732	4.1204	2.0817	4.27036
CG10431	1.8841	2.38759	2.15242	5.05582	2.64625	1.91435	2.42268	2.89133	2.59635	2.12939	4.15141	3.59322	2.84003	4.81929
CG10435	31.2315	34.8275	33.7506	40.9174	32.6704	34.6444	30.9152	21.4551	22.8292	21.2181	35.0697	51.1363	56.46	39.2161
CG10444	42.5356	48.1459	49.2218	74.5586	46.7181	40.2458	46.2637	12.7925	12.3507	12.2729	20.1752	12.4123	10.6803	26.1355
CG10463	8.92221	6.98935	7.42017	12.5222	12.0853	6.95082	4.34334	2.90266	2.715	2.1542	4.2757	6.55912	4.15964	5.04055
CG10465	60.2781	101.639	104.608	80.7474	72.6184	63.7108	40.5111	131.165	127.569	135.949	129.626	143.285	96.0559	188.949
CG10466	8.7822	6.1937	9.41185	19.6821	11.5225	14.3239	8.83293	12.9586	12.6906	12.8871	23.8982	16.3356	11.1104	26.6726
CG10470	80.613	56.9479	59.4027	102.009	97.1856	90.9884	54.156	73.5214	56.7589	60.8247	95.7393	55.2898	51.4584	79.7979
CG10479	1.81648	3.08411	2.9263	15.5876	7.78835	14.5892	11.824	3.59682	3.01922	2.07672	8.20711	4.06178	7.28541	8.32722
CG10505	0.126872	0.0942416	0.0581445	0.0647731	0	0.40677	0	0.17564	0.229343	0.277765	0.422332	0.333723	0.686899	0.98471
CG10508	45.2808	46.3065	44.6302	54.1782	312.217	394.672	483.355	1.89901	1.21728	1.84286	21.3612	9.29933	14.5226	20.3122
CG10510	0.039784	0.101321	0.182327	0.162491	0	0	0	0	0.0412214	0	0	0	0	0
CG10527	909.112	1094.9	1118.38	819.391	882.191	723.114	587.405	536.242	539.675	521.968	636.149	438.624	449.956	640.405
CG10561	23.5731	29.6845	29.1747	75.0341	38.4884	42.3557	36.1467	18.7219	17.664	18.2793	38.2223	17.5824	29.5734	32.8699
CG10565	68.1544	66.3887	71.6803	177.068	82.1558	81.9524	68.9611	40.8653	43.2487	41.852	76.5104	50.2502	50.6114	71.7096
CG10566	6.68255	7.13417	6.26433	15.0253	7.45738	15.4088	10.0472	3.54827	4.0758	3.45543	15.6111	16.899	13.8037	17.2041
CG10570	2661.3	2760.35	2597.89	8661.23	5869.76	3985.31	4289.78	983.558	765.784	917.137	4968.68	3298.53	3164.05	4753.48
CG10576	155.547	152.692	163.692	190.613	85.7114	116.018	82.8736	157.97	157.108	151.122	151.155	125.364	125.842	209.592
CG10581	8.03658	7.94392	7.87073	23.3814	13.8696	13.7421	12.5951	2.41635	2.38626	2.62996	4.16163	3.64592	0	4.56398
CG10584	22.7814	21.7249	22.6908	49.0044	20.3115	28.3072	19.1488	11.7147	10.7775	8.87029	23.2637	15.6254	14.1841	22.2467
CG10589	0	0	0	0	0	0	0	0	0	0	0	0	0	0
CG10590	47.5538	56.1531	59.5983	45.9365	21.4587	30.5304	26.0959	96.1253	83.3512	87.0112	50.8997	50.2918	55.0572	76.9618
CG10591	0.0666894	0	0	0	0	0	0	0	0	0	0	0	0	0.571556
CG10592	0	0.33709	0.109188	1.45962	0	1.29007	0	0	0	0.0709845	0.380927	0	0	0
CG10616	34.4246	40.3892	44.6937	41.6275	31.0662	29.2151	32.1899	41.9468	39.8034	37.0824	46.6981	40.7661	37.3232	58.2017
CG10621	8.29769	7.89787	8.06646	2.39628	0.609196	0.429955	1.61447	16.9015	22.7128	25.4905	130.573	139.374	118.569	146.966
CG10623	56.8264	57.6331	57.3292	54.2586	35.4551	31.2792	24.2171	26.5928	22.3224	22.1248	21.2194	14.0865	30.2903	22.4049
CG10628	18.0364	20.1078	20.7644	34.3184	17.2687	18.3003	14.4602	5.96088	7.81466	6.33925	15.5173	11.31	17.9161	13.9786
CG10635	86.9974	83.0696	82.0898	115.568	72.4748	92.5564	63.3667	33.6152	24.1413	25.1183	56.3424	26.3465	8.21646	49.4709
CG10639	38.7787	40.2573	39.9033	47.3162	34.3015	25.9607	26.3725	36.574	34.6743	37.0566	41.6801	26.6216	21.4221	42.1357
CG10654	3.18034	2.28802	2.32217	8.87989	4.59705	5.8069	6.29289	0.668013	0.67289	0.237695	2.38104	1.14233	2.93905	3.90687
CG10657	1133.36	1413.03	1235.24	8.31165	2.29415	3.62179	4.36357	2263.37	2844.32	2511.67	59.8958	32.3792	34.5515	78.8974
CG10659	0	0	0	0	0	0	0.218834	0	0	0	0.1494	0	0	0
CG10660	18.8844	16.9019	18.7189	29.1999	23.9323	30.2457	19.7517	14.5743	13.5734	15.2927	16.3185	17.0547	16.9433	20.3122
CG10671	93.7545	98.1725	97.9719	131.726	81.8015	64.6811	79.5903	82.1444	85.1101	84.5046	113.238	91.2747	108.813	131.418
CG10674	69.5495	68.5279	68.1627	98.6212	61.2399	47.4383	56.2281	104.97	81.2888	89.6757	206.373	111.422	85.0026	114.892
CG10694	0	0	0	0.0976813	0	0	0	0	0	0	0	0	0	0
CG10702	3.40918	2.87546	3.40705	22.2487	8.56878	10.7188	6.83011	4.19157	5.20916	3.60275	21.3086	21.6429	15.855	50.4396
CG10710	4.93029	7.474	6.56339	9.30931	8.24776	6.97525	7.40022	0.472448	1.12873	0.827611	4.62632	3.88415	3.06997	5.45954
CG10713	1.0513	0.966845	1.12421	2.02765	0.764123	2.47179	1.94324	0.517913	0.652118	0.884571	2.57126	3.54259	5.37763	3.8605
CG10725	0	0	0	0	0	0	0	0.577103	0.0807379	0.0684489	0	0	0	0
CG10731	17.1171	17.1414	17.3804	29.8625	18.4757	16.6501	16.5127	17.3522	12.5456	13.7007	46.5966	14.8905	15.6032	42.7026
CG10738	0.666894	0.580294	0.962738	1.45269	1.16333	0.741224	1.05103	0.184802	0.0861809	0.131514	1.22854	1.0534	1.12023	1.55412
CG1074	22.0861	23.7444	23.3703	38.5439	15.2885	21.7264	11.3489	10.3855	11.4874	11.1631	17.4208	15.3776	18.2771	27.1068
CG10747	93.1241	102.211	109.951	89.0411	82.8706	55.7546	66.799	38.9826	37.465	38.0231	58.6658	51.756	42.8955	69.5086
CG10748	0	0	0	0	0	0	0	0	0	0	0	0	0	0
CG10749	0	0	0	0	0	0	0	0	0	0	0	0	0	0
CG10750	0	0	0	0	0	0	0	0	0	0.0551741	0	0	0	0
CG10754	43.4267	46.0322	47.823	76.9348	51.1747	42.9911	32.5714	39.1646	37.8314	38.5858	54.6161	45.6442	31.8646	70.7542
CG10761	0	0	0.0590445	0.263104	0	0	0	0	0	0.0545133	0	0	0	0
CG1077	0	0.21777	1.30626	0.0776095	0	0.0487381	0.199648	0	0.05892	0.0499519	0.268059	0.300076	0	0.523208
CG10777	22.6125	34.7289	33.1782	44.3047	206.679	251.838	272.671	41.617	45.3467	44.6713	38.4205	633.657	579.395	80.7798
CG10778	28.9911	30.2046	27.9078	25.3059	8.87232	11.8596	12.793	31.318	32.3222	31.726	26.905	29.4478	18.6731	39.7413
CG10799	12.9104	12.2368	15.2801	0	0	0	0	63.7842	67.6311	81.2278	24.4755	13.0471	1.34273	13.9992
CG10802	30.7333	33.0989	36.5244	52.6267	33.2989	30.601	26.2962	30.9836	32.3623	35.0786	30.5523	15.8046	17.2463	28.8688
CG10809	12.612	13.4697	12.9984	21.4434	12.0536	18.982	12.6202	9.41865	11.1512	9.90407	14.0477	13.522	13.6069	13.7027
CG10814	2.48442	0.87878	3.46322	0	0	0	0	1.5199	3.77431	3.33503	0.080617	0	0	0
CG10822	0	0	0	0	0	0	0	0	0	0	0	0	0	0
CG10834	0	0	0.196613	0	0	0	0	0	0	0	0	0	0	0
CG10839	0	0	0	0	0	0	0	0	0	0	0	0	0	0
CG10841	0.171486	0.339683	0.340561	0.116734	0	0	0	0.0703849	0.029541	0.0751342	0.358396	0.150451	0	0.0807149
CG10859	0.298665	0.0845147	0.0608336	0.0451794	0	0.340467	0	0.122416	0.0685048	0.232312	0.155834	0	0.718121	0
CG10864	0.909306	0.95356	1.42177	7.71905	5.90935	9.32914	10.4905	1.25611	0.554944	0.940952	7.57425	9.32678	6.16638	11.8269
CG10869	0.284162	0.241232	0.318339	0.558812	0	0.59388	0.589756	0	0	0	0	0	0	0
CG10874	27.9841	24.0358	28.6071	43.9255	28.9703	32.2011	28.7489	33.3614	29.3097	25.734	47.3195	24.2692	39.415	54.3991
CG10898	16.2172	18.235	17.2765	30.7437	22.0622	13.2897	15.1459	15.3797	14.9007	11.7121	22.3227	16.1301	15.9363	17.3072
CG10899	0	0.18993	0.273425	0	1.01183	0	0	0	0	0	0	0	0	0
CG10903	18.6208	23.4234	24.1157	34.075	13.589	16.1136	14.7855	24.7476	24.6002	21.5179	34.938	23.2676	11.1337	38.4086
CG10904	25.1874	21.2494	23.66	40.8938	16.5256	11.6367	14.6109	8.75272	7.99306	6.2973	15.6724	14.803	10.4948	16.9862
CG10907	7.66792	7.28355	8.28199	15.913	10.2027	14.3874	13.9356	8.97263	8.43563	7.48004	12.9886	10.7405	14.4372	21.8726
CG1091	48.8222	59.0151	58.1337	71.7292	46.7382	64.423	43.2893	29.0798	32.7975	29.4636	34.2234	32.277	35.8001	50.5098
CG10912	0	0.84733	0.0703741	1.56794	0	2.62574	0.179266	0.393614	0.413007	0.420172	0.250533	0	0	0.225691
CG10914	7.90269	8.01085	8.58825	11.7124	6.39831	6.10085	4.74912	2.7148	3.65995	3.16142	6.85944	3.2532	5.13964	7.1227
CG10915	21.4903	30.3674	31.7543	34.3744	25.2965	28.9771	26.245	17.3672	21.8319	19.7147	27.0692	68.4517	70.372	38.4721
CG10919	0.111267	0.0944573	0.203972	0	0	0.190261	0	0.137553	0	0.0978893	0	0	0	0
CG1092	6.44279	5.24526	7.16391	54.7856	31.6283	27.8128	30.8256	2.53896	3.71601	4.58661	99.448	74.0318	75.2728	101.98
CG10920	0	0	0	0	0	0	0	0	0	0	0	0	0	0
CG10932	59.4269	75.0055	73.8201	64.1168	44.46	37.2275	29.8596	58.8015	65.0063	60.9881	81.463	66.9906	82.7865	93.3993
CG10933	12.8945	11.0459	13.8066	11.0916	7.72494	7.71709	9.03197	16.4062	11.8908	12.2926	12.8805	19.4655	10.6842	15.6645
CG10936	14.3492	14.256	16.1306	50.5582	57.3176	78.5814	58.5588	1.92468	1.54596	2.03093	23.5082	16.5981	10.8039	39.4242
CG10947	17.3564	21.8608	32.9029	129.227	105.613	63.9361	70.4666	21.2997	25.3908	30.1813	183.543	126.485	116.114	165.85
CG10949	11.1968	12.6223	12.8805	17.7741	17.4846	12.7898	11.0075	1.78759	1.87566	1.43116	3.62671	4.05988	3.34256	3.39522
CG10950	0.213041	0.150713	0.260361	0.0483404	0	0.728576	0.165806	0	0	0	0	0	0	0
CG10962	8.94119	6.1716	9.42084	4.77813	0.323926	4.57237	2.92657	1.85697	3.29073	3.30377	1.05062	1.32312	2.17868	4.0224
CG10970	0.20201	0.342981	0	0.275024	0	1.3817	0.471662	0.501665	1.05276	1.07102	9.25988	26.2722	7.50437	24.1622
CG10979	21.7617	26.8728	25.8926	26.5256	19.4284	21.0727	15.6027	27.0166	30.9793	29.1319	24.9754	22.499	19.2703	31.9546
CG10996	0.424633	0.13518	0.0486515	0	0	0.0907622	0	0.196303	0.0549267	0.139699	0	0	0	0.225114
CG11007	15.3557	16.9465	18.7195	30.9407	10.5658	15.8857	19.1814	6.65395	7.55211	5.26882	25.7691	16.8273	12.8646	20.5271
CG11018	0	0	0	0.268083	0	0	0	0	0	0	0	0	0	0
CG1103	14.4744	16.9724	20.9786	30.7907	7.71506	25.0599	16.4753	13.2493	13.0392	14.4684	10.4687	6.59197	9.64847	13.0982
CG11030	30.8972	28.251	28.9518	40.6994	37.8993	43.1874	42.728	15.2147	13.9151	13.898	43.7469	41.583	35.7013	62.3255
CG11034	10.0849	12.936	13.6624	25.3853	16.0026	13.7388	10.9324	5.424	4.55299	3.93281	10.4222	7.72936	10.0859	12.8704
CG11035	31.6159	25.9218	29.474	72.2289	48.1849	40.9695	37.4347	26.8085	21.7565	26.9154	50.27	34.4778	34.6506	41.2034
CG11041	0	0.455833	0.738247	9.1379	3.64259	2.29541	2.19399	0.990381	1.66269	1.52708	13.0277	7.76229	0	1.51431
CG11044	7.49215	7.60462	10.3755	47.3418	28.8062	24.3691	24.0529	2.25749	2.86351	2.39196	52.8133	29.8107	23.8374	54.1349
CG1105	85.5948	90.1174	99.515	90.5538	73.3944	94.0056	65.0435	125.803	98.5268	104.844	89.2953	87.7355	81.9434	116.803
CG11050	163.775	177.455	207.279	301.965	226.381	159.096	172.538	211.158	244.754	227.244	383.834	220.853	251.847	366.785
CG11052	0.139645	0	0	16.5402	5.14259	11.9392	5.86886	0	0	0	5.35679	0.359795	2.3698	1.15815
CG11068	0.139177	0.0590755	0.31892	0.947409	2.15805	5.71164	2.11223	0.254155	0.284455	0.120579	0.539226	3.25959	0	0.0971516
CG11069	40.2016	57.9039	48.9415	19.182	13.3538	21.2648	15.3625	10.8195	9.93682	10.3568	14.1511	6.07654	10.3792	10.8018
CG11070	40.3358	45.7153	46.1708	58.338	41.344	34.5398	34.4422	43.8377	43.2344	41.449	39.5367	33.0562	38.3927	53.8835
CG11073	408.14	453.498	453	460.455	400.995	540.521	378.574	482.119	495.334	497.025	718.27	738.876	869.298	1015.76
CG11077	71.3385	69.6026	75.6046	80.2611	74.8962	48.0737	36.1467	14.4676	9.33196	11.7048	23.2637	8.78928	16.6168	20.0839
CG11089	14.847	14.9691	17.5199	20.5974	9.22776	13.3873	9.79855	11.902	15.4236	16.8164	12.6627	5.10677	8.7912	9.21538
CG11095	11.4696	15.479	15.7693	24.824	16.673	32.0586	13.7332	21.9299	23.2404	23.5396	23.9617	12.8909	4.50261	18.0231
CG11099	7.15582	6.91585	7.7194	36.3461	20.0577	19.0131	24.0335	4.76314	3.59843	4.16447	40.8848	26.0354	33.2907	38.0794
CG11107	47.2367	47.1512	51.3018	74.141	40.0521	61.5918	40.6509	39.3452	39.4668	39.9963	59.6282	44.9848	52.706	66.1458
CG11110	10.9511	11.6724	10.1491	26.3396	10.6128	14.7725	18.7506	12.642	17.4337	15.3157	40.041	26.0577	32.8426	30.548
CG11123	13.5793	12.909	12.5039	20.8729	10.3096	9.84436	7.23238	12.3835	10.7545	8.53562	11.253	10.9877	9.25196	12.9506
CG11125	9.70634	11.6088	12.1899	18.8363	8.52308	19.3482	10.6428	1.71888	1.16539	1.03505	5.13365	2.82629	3.2577	3.56323
CG11127	29.102	33.6355	35.1271	45.2356	31.6162	29.715	29.7545	3.26368	3.76692	4.85256	11.6477	5.35678	1.64104	8.42101
CG11131	0	0	0	0.371102	0	3.57342	0.424289	0	0	0	0	0.967946	0	0
CG11134	27.4983	26.8454	29.3213	28.8266	7.63936	9.71756	11.5567	13.8727	11.645	9.62971	16.0675	11.667	10.8063	14.2135
CG11137	235.52	206.429	219.551	320.475	239.057	194.398	157.156	98.5162	92.0768	85.1776	158.166	169.41	167.166	254.953
CG11141	25.789	28.6846	27.8281	43.5684	27.8325	28.0622	25.2484	15.4017	15.2707	13.849	23.1122	19.4432	21.1738	26.1399
CG11145	0	0	0	0	0	0	0	0	0	0.12386	0	0	0	0
CG11147	359.397	430.757	419.759	673.923	553.258	548.944	459.094	320.424	279.677	268.624	1035.75	2920.39	3085.11	1614.27
CG11148	64.891	83.4819	90.0386	113.545	86.2936	145.652	92.7289	59.3434	58.9618	59.2003	73.9222	92.2509	96.9751	141.468
CG11151	1099.15	1186.99	1168.66	1486.33	1162.17	1380.76	865.588	1068.73	780.493	830.997	1489.05	1156.62	1122.1	2203.58
CG11158	30.6057	30.449	27.4983	19.2692	9.96494	16.1346	13.4163	18.2536	22.1043	18.1542	32.8549	20.3085	15.9304	30.2836
CG1116	51.3817	54.168	52.1285	83.0152	48.0584	71.454	47.6365	26.2811	28.1968	24.194	33.3078	25.6704	30.7321	44.6418
CG11162	0	0	0	0	0	0	0	0	0	0	0	0	0.161965	0
CG11164	2.32549	3.11709	4.15083	28.0775	1.42337	8.26684	2.42906	3.54717	4.05453	3.49111	5.57232	4.67839	12.4851	8.74137
CG11168	24.1342	26.0962	27.5132	37.945	35.235	49.4722	36.3092	17.1969	17.9432	17.0521	36.6644	32.8391	38.7828	45.9577
CG11170	7.11506	7.86735	9.48091	9.19832	3.82428	5.72532	5.02564	6.41405	6.46088	5.07171	3.71961	6.2458	4.64058	2.04316
CG11178	11.154	11.7674	13.3797	14.344	8.84151	14.0403	10.0323	11.6856	11.4541	10.9503	14.9218	14.4286	12.007	17.5206
CG11190	63.8673	62.2268	60.1968	76.9719	263.634	307.394	463.862	24.0417	28.4647	26.4731	33.1379	38.2822	27.5875	39.9115
CG11191	30.4895	34.8024	33.9257	75.6334	68.9448	72.2144	65.7368	12.8361	14.9528	14.6654	85.8139	58.6085	68.8455	79.6081
CG11192	0	0	0	0	0	0	0	0	0	0	0	0	0	0
CG11200	137.912	136.333	131.835	492.578	312.064	302.17	311.741	101.472	88.8173	90.5229	148.126	95.9373	111.039	157.308
CG11208	56.1936	60.6716	63.6274	78.2497	49.2039	54.6836	45.9297	67.8203	80.2998	75.4308	141.248	116.515	131.346	178.005
Tmem63	69.0189	79.4625	81.1034	67.4641	54.0192	43.5372	44.1066	107.849	101.055	97.0743	88.3715	88.9327	75.5987	135.731
CG11221	1.91644	2.053	2.13299	14.1638	126.204	139.116	192.727	1.11481	1.12295	0.991691	5.88943	4.05104	4.51243	10.2913
CG11226	0.849263	0.18024	0.0973031	0.289056	0	0	0.247863	0.133952	0.112442	0	0.682078	0	0	0
CG11236	7.32211	6.37132	8.89252	0.415359	0	0.208673	0.284932	0.827746	0.378994	0.856823	1.43688	0.48255	0	0.172587
CG1124	3349.59	3307.46	3448.44	28.788	25.5743	13.5951	25.0805	1022.25	969.064	910.074	703.629	545.55	564.206	909.779
CG11241	19.7421	25.7651	25.0031	32.6212	17.6239	32.9174	21.9954	5.90806	4.7912	6.94807	4.84396	4.17391	10.045	8.15314
CG11247	25.3909	24.1943	25.6843	47.1039	32.2167	41.5086	29.13	9.08484	11.4595	8.00289	21.692	19.3143	21.0871	23.4268
CG11248	9.92719	11.7048	13.0053	21.9794	15.7914	19.0325	10.5357	15.9982	14.2748	14.4703	20.0546	21.1446	21.8146	29.6549
CG11249	0	0	0.0594124	0.132371	0	0.277093	0.0756715	0.0795801	0.133601	0.169899	0.405217	1.95622	1.33048	1.77955
CG11251	0	0	0	0	0	0	0	0	0	0	0	0	0	0
CG11257	9.684	10.433	10.9438	13.343	11.7594	6.31772	7.35527	3.37018	2.82898	2.83753	7.49274	4.26147	8.18658	8.9816
CG11267	117.368	90.7183	105.355	162.265	64.9958	62.522	62.731	137.456	160.23	144.231	216.171	119.565	91.3767	195.311
CG11269	0	0	0	0.264742	0	1.66256	2.27014	0	0	0	0	0	0	0
CG11275	130.131	156.981	142.692	53.1225	35.9767	37.0292	35.5329	107.814	146.566	151.043	76.021	44.9605	49.6803	72.0801
CG11279	31.0065	26.1489	24.8676	38.0476	13.4429	17.0918	22.8617	16.4655	10.8445	12.619	27.4098	10.288	12.0367	16.8486
CG11289	0.414482	0.38705	0.379909	0	0	0	0	0	0	0	0	0	0	0
CG11298	0	0	0	0	0	0	0	0	0	0.114513	0	0	0	0
CG11307	10.455	10.7992	12.3209	35.1989	12.0787	12.6816	9.62002	14.819	15.2567	13.1148	19.6705	24.3664	31.4291	34.7866
CG11309	145.231	145.572	157.558	182.337	161.778	131.58	121.313	146.041	122.713	119.454	149.103	82.8236	111.134	132.538
CG11318	0.0259439	0.0660729	0	0.070642	0	0.221813	0	0.0640423	0	0.0911511	0	0	0	0
CG11320	0	0.140932	0.101444	0.678051	0	1.70323	0	0.0644456	0	0.0458626	0.328154	1.79082	0	0.517327
CG11333	0	0	0	0.27772	0	0	0	0	0	0.0896921	0	0	0	0
CG11340	0	0.0335809	0.0362575	0	0	0	0	0	0	0.0685778	0.184007	0	0	0
CG11342	3.84667	6.01152	6.9715	9.52185	2.37227	4.93319	3.6742	1.18749	0.815555	1.38285	2.19877	0	1.89984	1.11417
CG11349	0	0.0280819	0	0	0	0	0	0	0	0	0	0	0	0
CG1136	23.3965	26.1868	28.5238	45.8311	33.9889	37.5985	37.9739	26.3827	26.5465	27.2503	31.9164	24.7257	26.374	35.3516
CG11368	12852	14076.2	12462.1	3520.01	2746.07	2479.57	1531.43	14192.6	13578.6	13997.4	4356.93	1814.43	1315.93	2702.1
CG11369	0	0	0	0	0	0	0	0	0	0	0	0.0798378	0	0
CG11373	0	0	0	0	0	0	0	0	0	0	0	0	0	0
CG11377	68.4297	71.7874	78.3251	58.4727	39.3583	41.1915	29.0966	54.3679	41.5818	41.8868	46.2553	51.6344	56.4025	65.9366
CG11378	75.8921	81.7507	83.1929	6.26472	5.04109	11.4035	4.82697	293.287	267.459	257.929	58.7912	107.631	127.454	89.9877
CG11379	0	0	0	0	0	0	0	0	0	0	0.163664	0	0	0
CG11382	0	0.0349773	0.415417	4.76799	2.63534	5.98851	1.924	0	0	0.0354921	30.0932	0	0	0
CG11384	0	0.03004	0.0324343	0	0	0	0	0	0.0380786	0.0322827	9.18176	0.193932	0	0.364147
CG1139	1.98382	2.58491	2.24121	2.13555	3.75566	2.7611	1.50806	0.227421	0.190901	0.242766	1.66465	2.18755	3.50203	3.12959
CG11391	2.95598	4.95361	4.53914	35.6968	16.2951	28.8175	19.7192	0.898544	0.198487	0.100966	32.9906	22.3406	3.57878	0.271163
CG11398	10.9411	7.30162	8.05754	13.1735	12.7483	10.5979	4.72522	8.9694	6.7885	7.95269	13.2897	125.722	153.193	20.3187
CG11399	19.7893	22.1562	27.6535	50.2813	30.4219	42.3078	31.0496	15.5009	18.7247	15.9735	22.703	29.1555	43.5107	31.7928
CG11400	61.16	55.2209	57.9849	33.0487	29.5337	21.2035	24.5359	183.847	157.728	173.618	141.49	258.203	195.36	269.67
CG11403	4.22907	4.00045	5.16102	10.1992	4.4029	6.48765	5.19101	0.750731	1.76449	1.23947	5.00772	4.23646	4.43919	6.02638
CG11404	0	0	0	0	0	0	0	0	0	0	0.174167	0	0	0
CG11407	1305.66	1319.25	1234.93	1599.03	1570.94	986.616	913.74	0	0	0.0337801	0	0	0	0
CG11409	4.63643	4.08788	3.84708	1.15171	0.472971	1.08489	0.72169	0.27638	0.149141	0.435518	4.47325	0.210991	0.660106	0.792357
CG11412	49.9479	51.7255	60.452	102.19	57.7653	73.045	56.3129	23.8705	30.6647	26.9358	41.1313	37.9158	42.4732	58.6041
CG11413	0.879169	0.621956	1.07444	81.9901	52.5409	85.9403	54.055	0	0	0.124709	51.7539	23.9733	23.7467	82.3927
CG11414	46.2698	48.1825	53.3647	61.5232	40.6544	42.1857	33.9003	32.4506	32.8549	31.4663	48.2936	47.602	58.7096	68.269
CG11417	14.3032	14.8685	16.3752	31.3035	42.421	94.3691	87.4585	5.08439	5.69054	5.40425	9.16918	11.6345	13.135	15.1745
CG11425	87.0486	92.4293	96.9827	96.4066	82.2441	71.7408	58.4566	15.5215	16.8947	11.8956	14.6562	9.47941	18.6109	19.2665
CG11426	38.7377	54.1336	51.0441	47.4902	49.462	25.9516	33.8639	90.4608	123.233	103.338	128.92	72.1047	108.679	88.9798
CG1143	90.679	97.8058	90.0735	743.213	501.111	443.052	451.838	28.4276	27.8397	27.536	485.322	386.198	425.942	620.483
CG11436	9.70996	10.826	11.1147	18.2758	4.5966	15.4557	8.35804	4.24577	5.3228	4.55186	7.58078	6.48252	5.14308	13.342
CG11437	2.31947	4.16975	3.43911	0.835893	0	0	0.318564	0.16777	0.492899	0.238786	5.97993	3.40684	8.85761	5.0022
CG11444	113.907	134.325	139.62	161.005	89.661	79.2663	77.9558	177.072	184.297	184.276	198.9	193.064	186.807	328.742
CG11447	25.3846	27.979	27.3866	37.6189	21.7775	24.0512	21.9587	4.86838	7.39065	6.41316	9.23015	6.42096	2.55209	11.5221
CG11453	4.86398	5.04672	5.97974	7.46289	6.88357	7.26098	8.38226	0.596064	0.19244	0.652595	4.61106	2.94026	9.44098	8.09738
CG11454	45.0236	35.1786	39.9859	42.1341	38.1259	33.1869	23.0658	26.9824	30.0489	24.9396	38.7274	31.2508	37.0804	50.5435
CG1146	51.2579	55.3455	69.8677	145.594	136.222	126.39	104.102	48.5707	55.6339	62.8878	173.186	77.7797	80.4753	106.927
CG11523	24.8894	27.3897	34.5217	64.7228	38.2868	38.0558	35.0521	27.4487	21.3341	26.648	35.1575	43.4614	37.8697	54.9879
CG11529	3.69741	3.07727	3.72125	108.375	297.055	449.88	207.189	43.1467	25.5172	42.6955	40.6265	145.583	119.861	31.6911
CG11534	23.133	25.3105	27.9481	24.5274	13.7708	15.1138	18.5635	19.1754	20.9872	20.6201	17.8019	11.7757	8.38997	7.77536
CG11539	13.4205	14.2191	14.2082	13.4555	10.0822	16.0105	13.8456	9.94971	7.59264	9.10375	10.363	9.66723	5.45771	12.2991
CG11550	2478.89	3034.63	2810.02	104.754	77.5449	71.5157	67.1658	735.329	846.185	819.641	7.01829	8.83862	3.33528	16.2011
CG11562	18.6431	22.3267	19.9868	30.8203	15.1636	17.9317	16.7119	4.14403	6.95711	4.7442	11.4681	8.0878	9.51257	4.54561
CG11563	24.4256	25.002	26.5341	52.8232	14.0274	37.1257	26.2854	42.9727	33.0485	33.233	71.1464	45.3971	54.862	83.8891
CG11576	183.375	208.045	198.859	67.0087	54.3238	46.2451	41.4984	86.1779	83.5193	73.1295	32.9044	19.1298	32.5189	40.7498
CG11581	0	0	0	0	0	0	0	0	0	0	0	0	0	0
CG11583	24.1969	23.171	23.9464	60.3152	20.3909	30.6817	19.1049	29.2295	25.0863	23.8616	42.3122	25.3969	32.8396	45.1383
CG11586	25.7406	21.8518	26.0511	49.646	30.5583	29.3433	18.7814	18.4264	14.2434	14.5282	26.3254	13.318	15.1643	20.6747
CG11590	39.5123	36.3083	37.8538	44.208	23.0159	20.4847	18.8927	46.0264	40.7386	49.1789	32.0656	21.7063	24.3698	24.1978
CG11596	16.4722	17.3924	22.4173	51.6231	13.1776	28.0105	19.816	15.6936	14.7969	13.9604	19.5556	19.6076	17.0185	24.5872
CG11619	0.446503	0.530664	0.57296	18.5202	16.1546	26.0605	18.5568	0	0	0	0.233304	0	0	0
CG11629	0	0	0	0	0	0	0	0	0	0	0	0	0	0
CG11634	0	0	0	0	0	0	0	0	0	0	0	0	0	0
CG11635	2.32805	1.29697	1.40035	3.66474	16.2161	21.6458	27.5179	1.20074	0.852853	0.788769	2.93946	18.5587	20.4813	5.61376
CG11638	6.77437	5.47705	4.48449	14.054	8.85772	12.7789	16.3192	0.729104	0.94585	0.943394	11.6439	11.1928	9.79845	24.7793
CG11652	90.4693	140.024	99.2638	54.5959	19.4537	21.6294	26.1096	182.596	204.333	218.851	66.6483	51.5501	73.9502	63.4725
CG11655	69.8747	83.0378	83.1597	74.8966	57.5238	51.296	45.1644	117.322	144.917	138.032	153.164	137.708	115.304	188.792
CG11656	0.071502	0.0606996	0.0655377	0	0	0	0.166946	0.0958237	0	0	0.243965	0	0	0.219774
CG11659	0	0	0	0	0	0	0	0	0	0	0	0	0	0
CG11663	0	0	0	0	0	0	0	0	0	0.123023	0.220062	0	0	0
CG11664	0	0	0	0	0	0	0	0	0	0	0	0	0	0
CG11666	0	0	0	0	0	0	0	0	0	0	0	0	0	0
CG11672	0	0.0735981	0	0	0	0	0	0	0	0	0	0	0	0
CG11674	0	0.564821	5.65489	53.8551	0	24.2018	3.10693	7.78024	13.3756	9.52964	1.8094	0.799544	0	0
CG11679	20.5097	20.3972	20.6153	28.8671	9.60208	12.029	10.1789	8.10491	8.73271	7.44656	14.4752	8.79159	10.3251	11.0285
CG11686	134.057	198.084	222.863	237.951	79.5052	70.141	204.734	19.2814	25.8338	20.8462	138.773	68.9556	54.1619	100.351
CG11693	0.392585	0.222183	0.479784	0	0	0	0.152771	0	0	0	0.405848	0	0	0
CG11697	0	0.0735981	0	0	0	0	0	0	0	0	0	0	0	0
CG11699	86.7908	99.9317	103.978	142.607	132.035	100.644	104.815	46.4057	58.2083	56.8826	111.859	77.3187	71.4209	67.7852
CG11722	25.0094	22.7102	22.3596	37.8165	32.1835	31.723	23.453	15.0723	14.2467	17.8469	28.6996	15.432	15.3802	19.4631
CG11741	8.38489	3.95452	3.98507	0.422798	0	0	0	0	0.650797	0.551741	1.97389	0	0	0
CG11753	47.466	58.2896	64.9622	64.7991	25.2054	40.0261	34.3104	27.5281	25.826	31.114	53.3889	24.5754	21.6582	33.7965
CG11755	13.6462	9.06118	9.65953	24.2807	21.9975	5.77578	3.78554	2.00666	2.52663	1.66604	11.0693	0	2.06002	4.02703
CG11760	8.23901	9.95794	11.6476	35.552	43.0354	40.5932	32.2788	12.2738	9.28706	9.96487	42.252	32.1482	23.7301	33.7012
CG11777	19.6439	16.5664	14.5701	39.764	25.5499	22.3196	17.803	8.36742	5.80807	5.38208	11.8806	7.91097	7.36277	15.1313
CG11779	31.4598	29.9395	31.1624	44.9907	21.2626	25.8895	26.4603	42.8252	45.1865	46.1815	57.7826	44.6125	36.2283	76.4449
CG11781	61.1321	61.4314	65.484	95.2602	54.9612	47.8582	52.0204	76.5263	80.7283	72.0169	135.511	90.3343	64.7252	138.578
CG11786	0.281176	0.238696	0.0859072	0.127601	0	0	0.437667	0	0	0	15.9128	0	0	0
CG11788	4.94473	3.69895	4.44252	8.59818	2.65695	5.44146	2.62909	1.08615	1.51955	1.07355	6.75966	4.12746	9.55744	9.54933
CG11796	230.3	314.736	416.259	1096.65	682.723	449.323	499.235	31.5255	49.7526	39.5376	2574.43	1441.25	1406.51	1814.35
CG11807	57.4205	65.1138	67.1964	72.1167	53.3061	52.1	46.2065	31.703	34.009	34.0647	43.3445	30.3167	34.4119	51.9626
CG11808	15.7715	10.1626	11.2338	26.9047	28.7273	25.6687	25.7324	7.00956	5.00134	5.15462	10.2616	15.9821	2.46718	14.201
CG11811	44.8288	39.5724	46.6554	70.7579	38.5979	44.4353	30.8584	26.1484	24.0308	25.0252	34.8649	13.7324	22.4139	28.0473
CG11816	0	0	0	0	0	0	0	0.143333	0.0601578	0	0	0	0	0
CG11825	4.99368	6.88877	3.43285	20.3958	11.292	9.96206	5.34393	30.7535	27.3335	37.3345	9.86946	2.76206	3.63848	15.7072
CG11835	6.80483	6.19889	9.88353	87.6194	62.4969	74.6483	54.4475	4.41663	6.9381	7.20666	81.0417	54.4865	51.9661	89.4666
CG11839	8.51941	7.99728	7.95896	15.1675	6.8273	16.8088	5.92919	7.38221	7.13049	4.17404	16.6064	16.6444	13.7036	25.397
CG11842	11.6754	9.52389	10.9407	6.12726	5.689	3.68057	2.74126	11.5856	11.8187	12.4246	44.6547	43.8544	32.283	51.4832
CG11857	142.779	152.794	158.302	161.034	95.7558	76.9413	96.205	193.533	176.276	167.383	140.434	126.976	90.9439	166.743
CG11858	36.4923	25.0007	26.9934	60.5772	36.6061	32.5683	22.422	29.1549	31.2988	32.3217	54.7871	36.4592	30.3665	44.3509
CG11865	0	0	0	0	0	0	0	0	0	0	0	0	0	0
CG11885	14.1665	14.5317	18.6656	40.7835	13.7289	23.7192	19.9837	23.9402	21.1695	16.9069	28.1491	29.6882	43.0965	31.8547
CG11889	1.84618	0.931887	1.14337	19.0887	10.8317	15.955	12.4657	1.55453	0.815555	1.56723	12.7804	22.2909	11.855	18.6438
CG11897	48.5194	60.8067	59.921	67.4169	17.3466	33.5331	21.7095	93.0889	92.8474	84.7635	60.2929	57.0402	70.4013	82.0572
CG11906	9.94404	9.83473	10.2877	20.0169	9.22344	10.6063	9.27178	8.3272	8.67833	7.87272	15.1068	15.306	19.1148	21.0823
CG11911	0	0.382604	0.688499	0.920385	0	4.11018	0.175383	0	0.700318	0.395814	0	0	0	0.425215
CG11912	0	0.0651789	0	0	0	0	0	0	0	0	0	0	0	0
CG11920	13.1266	14.4628	19.3274	32.51	13.1271	14.2077	14.1831	7.22295	10.0808	7.3697	15.62	9.67286	10.1079	25.7472
CG11927	19.6156	21.3118	22.1135	34.1783	28.4528	26.4113	22.552	33.6066	30.478	28.1825	58.3667	58.4793	67.0192	54.9032
CG11929	0	0	0	0.0616484	0	0	0	0	0	0	0.0354399	0	0	0
CG11964	28.1843	26.2065	29.5098	43.1007	20.685	26.4545	23.9143	18.2685	17.2941	16.0673	24.9127	16.0229	17.3785	23.2659
CG11966	0	0	0.0322152	0.382803	0	0.180298	0.0820627	0.0432177	0	0.0307558	0.660188	0	0	0
CG11970	12.6248	14.6273	14.2058	23.9195	13.2321	18.798	13.5957	16.4965	15.3091	15.1856	22.2443	22.855	22.1233	37.5375
CG11975	42.8992	42.3925	46.1079	60.3208	37.7193	41.1249	30.7204	49.3585	53.9126	48.7144	67.3482	56.6248	73.0513	82.0477
CG11977	0	0	0.069604	0	0	0	0	0	0	0.136898	0	0	0	0.330901
CG11980	78.1717	67.9896	67.602	93.4492	59.0287	38.0634	32.5684	9.38833	9.20414	9.63926	25.5445	18.6892	18.1619	24.1622
CG11985	39.9005	41.3534	38.8159	90.6482	55.0369	40.6017	36.0072	58.4798	35.5382	36.8484	84.5249	47.5273	46.6343	89.067
CG11999	89.9712	96.7407	107.012	78.0317	54.3317	59.9568	55.7783	155.295	133.952	130.755	133.761	106.58	117.068	140.968
CG12003	0	0	0	0.124243	0	0.156047	0	0	0	0	0	0	0	0
CG12004	76.8777	91.8676	92.754	95.1046	71.3509	78.3086	73.8964	100.361	116.104	104.047	102.938	124.479	128.307	148.968
CG12006	26.1108	28.5576	31.5137	54.2312	35.5122	62.4055	44.3379	24.5762	25.4791	24.4397	30.4097	25.2863	23.6428	39.3301
CG12007	29.3318	29.6335	31.4401	36.1382	30.9317	21.6236	27.8281	15.0016	13.6276	13.2352	12.6876	8.01664	11.3018	13.6684
CG12016	38.0066	36.7489	42.1578	46.0431	37.8315	40.6457	32.638	41.427	51.1975	48.4217	69.071	59.9377	44.0503	78.5727
CG12018	7.5311	9.01619	9.77905	16.8914	5.89492	10.4838	7.32662	4.21469	5.4812	4.26671	13.9798	7.86708	7.62624	12.1852
CG12024	26.7926	26.2533	29.4562	41.2301	36.0472	29.4866	29.6145	27.4674	29.3773	27.6461	39.6495	31.0941	31.6238	53.6752
CG12025	59.3611	72.4206	84.3629	99.9792	81.6064	64.4604	58.8689	106.704	114.077	100.034	107.479	153.451	110.976	122.192
CG12027	0	0	0	0.192704	0	0.242032	0.330483	0	0	0	0	1.38453	0	0
CG12034	22.3605	22.4191	26.5792	43.4525	13.5038	17.8699	13.1894	17.839	21.9689	17.1217	26.5932	20.9474	17.143	36.4729
CG12035	0	0	0.0635713	0	0	0	0	0.082532	0.0692786	0.0587338	0	0	0	0
CG12038	3.22074	4.29653	3.93612	6.82086	4.65712	7.51788	4.53582	2.9618	2.11589	2.28714	12.8352	13.7396	8.98306	17.416
CG12050	11.5011	12.9631	14.3881	21.9002	7.26746	11.4609	9.48034	16.0112	13.8161	13.1228	18.0107	22.8333	21.2473	31.0164
CG12056	55.0987	57.6066	60.7363	73.1381	51.2892	58.3888	50.6124	34.8314	41.747	44.4006	42.2829	37.8024	33.3352	33.2518
CG12057	0	0	1.13209	0.776095	0	5.84857	0	0	0	0	1.03161	0	0	0
CG12081	20.0842	22.7478	21.201	33.2478	14.5104	12.3599	13.7425	20.842	27.8688	24.5777	29.4228	24.8456	28.9202	33.3999
CG12090	39.7274	42.2254	43.5653	49.0777	36.4631	85.744	47.5743	32.6017	33.5064	31.5745	43.1869	59.0399	54.9285	59.4388
CG12091	110.906	128.212	135.995	280.716	217.85	174.014	185.244	72.3573	109.06	100.596	211.09	149.198	199.662	216.015
CG12096	37.0496	38.6433	43.0049	43.3309	29.6487	32.2037	26.8828	20.9654	21.7746	20.664	35.0249	29.0807	36.3604	45.0576
CG12099	158.139	175.288	187.024	214.257	138.701	179.754	153.36	140.983	147.207	152.276	204.179	179.01	188.036	269.105
CG12104	29.9621	32.7835	38.7531	30.8203	16.2928	14.3739	16.5175	24.062	29.1465	23.4818	25.0732	20.8338	16.2594	33.182
CG12106	5.91668	8.45507	9.30973	17.7215	11.2768	9.44271	10.1307	14.8636	15.238	14.566	27.4512	12.2399	24.4427	22.3541
CG12107	95.8662	82.953	90.8362	97.7824	105.751	82.4901	48.581	74.2726	52.0882	51.3614	63.4372	64.4839	49.3944	83.2026
CG12111	0.221351	0.37582	0.405775	1.95881	1.5016	4.16348	0.77523	1.91544	0.689081	0.584197	4.18001	2.92454	0	4.23623
CG12115	0.316456	0.268647	0.217544	0	0	0.405842	0	0	0	0	0	0	0	0
CG12116	95.4224	119.633	133.5	2.80161	0.295448	2.47618	0.177953	27.4661	18.7918	15.7977	3.5922	0	0	1.18654
CG12118	50.6255	48.2637	52.1106	77.302	52.9669	67.0234	45.331	44.4712	59.1966	59.9852	108.722	60.8538	81.0471	75.6435
CG12121	75.8696	81.7835	86.2607	82.8328	59.7827	70.6755	46.5405	119.582	116.223	107.439	114.302	110.567	122.476	186.603
CG12123	15.4621	16.3671	19.3338	18.4518	9.80469	7.34424	10.0282	9.90381	14.4495	10.4043	7.9547	7.81269	11.4122	10.0053
CG12125	15.8926	23.0467	24.0844	33.5074	15.1328	16.4001	13.6952	13.4813	18.7092	17.2971	20.9822	15.6705	9.43818	27.0265
CG12126	0	0	0	0	0	0	0	0	0	0	0	0	0	0
CG12128	18.7907	19.7759	20.3691	35.6867	20.9543	16.1389	15.1252	32.4178	31.4814	28.1521	49.3117	47.2213	48.0099	66.8689
CG12134	13.7701	15.0849	16.6585	29.1546	12.3636	17.2267	10.0472	3.80653	3.98098	3.37504	10.4063	8.40341	9.99361	18.6057
CG12147	0	0	0.039982	0	0	0	0	0	0	0	0	0	0	0
CG12155	20.0572	23.9333	21.9235	30.8285	27.1765	26.6039	20.3953	19.3503	21.5539	21.1653	35.4499	124.284	134.184	52.2186
CG12158	22301.7	13411.2	9049.52	6930.47	4198.81	2454.94	2769.12	3752.05	3699.04	4192.63	5802.49	1487.88	1227.86	1825.59
CG12159	30.0774	36.114	33.0445	42.0705	35.9365	30.8232	31.265	20.7347	16.9979	21.2277	41.985	41.9886	42.6789	39.3515
CG12162	43.9992	49.9748	56.7956	111.859	69.2474	62.2195	54.0317	48.8553	56.1851	54.0882	138.718	67.3917	83.5572	104.806
CG12164	0	0.429508	0.289839	0	0.612899	0	0.147663	0	0	0	55.4074	0	0	0.178901
CG12179	2.42381	2.80586	3.82294	10.671	2.71501	8.55828	3.38084	0.522141	0.568157	0.756924	2.73256	3.679	4.45838	2.81645
CG1218	17.2851	17.9782	19.2413	46.4974	24.5206	24.1682	17.42	13.078	16.7305	15.3625	25.0812	17.2124	35.2773	35.6925
CG12182	2.30856	2.82514	2.63812	4.93894	5.05561	2.35824	2.38006	3.18862	4.58842	3.75495	6.42688	6.89697	7.94972	9.35912
CG12194	16.903	21.3419	19.7399	26.0496	20.1228	24.5017	21.3357	11.6295	11.0202	12.8372	18.4889	14.0313	19.7388	19.0265
CG12203	220.122	299.411	327.549	556.178	332.326	393.311	297.061	209.243	214.88	216.423	714.587	475.35	530.579	623.908
CG12207	123.25	157.138	151.112	110.833	77.462	78.4483	74.3317	157.831	202.006	182.571	89.7208	64.524	98.8859	122.875
CG12209	0	0.123954	0.46842	0.198789	0	0.124838	0.852299	0	0.0745708	0	0	0	0	0
CG12213	58.0896	57.0799	58.1417	92.5875	77.2051	70.0501	53.9684	34.4649	34.1703	30.8463	63.4038	60.5148	58.6423	90.4894
CG12219	19.6963	21.5922	23.6187	31.1501	19.375	21.1447	20.3141	10.6448	13.6774	12.3266	17.8299	8.78216	17.9941	27.1447
CG12229	0	0.0309344	0.0334	0.0496103	0	0	0	7.81885	7.5842	6.2134	19.8512	17.363	15.6713	20.8218
CG12231	0	0	0	0	0	0	0	0	0	0	0	0	0	0
CG12237	40.934	51.7784	55.4691	52.7668	25.6996	24.3006	31.1174	66.0943	84.0438	82.4798	89.9997	95.1587	84.7993	101.027
CG12253	2.47702	3.64486	4.89398	11.7656	6.82814	9.41237	5.26938	4.96728	3.02725	3.8255	7.36273	6.10886	2.87401	14.9821
CG12262	454.328	471.772	515.156	743.68	504.927	497.763	429.113	402.197	393.922	367.459	513.395	353.908	396.511	391.666
CG12267	7.57342	9.77925	9.97416	12.1559	6.41242	8.99694	5.58404	3.29652	4.95608	4.72694	7.26545	4.7327	11.2565	6.54505
CG1227	23.668	23.6802	23.6009	33.7274	11.9726	18.2341	15.3334	0.562012	0.269577	0.171409	0.408819	0	0	0
CG12272	18.4835	22.7357	22.7063	24.4268	19.0978	15.3847	15.6635	10.5161	11.8236	10.5259	14.6385	12.4272	14.1435	19.2168
CG12290	88.8863	111.16	108.238	291.901	2058.23	2117.56	3303.02	20.9733	18.9045	18.14	72.4566	74.809	48.6394	132.355
CG12307	0.228648	0	0	0	0	0	0	0	0	0.192672	0	0	0	0
CG12321	94.6003	94.7535	99.1402	139.229	121.15	88.2987	83.3943	86.0113	89.1356	80.8231	130.674	117.381	95.5434	133.461
CG12325	7.43266	8.413	9.52565	15.2831	4.92953	7.49816	5.83587	5.48441	5.3294	5.11424	11.3837	7.39196	9.8896	18.0004
CG1233	28.3631	29.4601	28.5649	28.7038	25.0046	29.2446	22.935	30.9473	35.457	34.7009	32.9453	37.2039	36.6287	50.8888
CG12333	20.5934	22.7413	24.0448	32.9808	19.4605	19.5063	18.9536	11.8449	12.0639	12.8127	22.45	16.8793	16.5837	22.0351
CG12338	33.6638	30.6871	32.6206	29.4268	20.3449	18.5859	20.8827	8.50273	7.33022	9.86693	33.0568	23.5785	14.2897	33.205
CG1234	15.2382	15.5361	17.2153	27.6038	18.3491	22.3774	18.2032	12.2547	9.81802	9.16263	18.4436	15.1865	11.5204	26.2921
CG12341	21.7823	19.5955	28.0111	37.1798	21.1095	24.4604	15.1816	27.5995	24.182	24.0855	39.7499	24.5454	35.8082	42.0461
CG12343	52.1096	54.6317	54.2607	68.9385	63.3482	51.0067	42.1323	22.9695	17.0856	16.589	33.0035	30.1397	49.0285	41.5974
CG12360	49.9838	49.4379	54.6331	54.525	32.5207	33.3049	28.2172	58.9272	62.245	62.8862	38.5188	31.1036	52.6578	57.4088
CG12362	0	0.1037	0.0746434	0.0554354	0	0	0.285212	0	0	0	0	0.53303	0	0
CG12374	1.28195	13.143	0.994246	1.87955	3.6315	1.18034	0.575606	0	0.30391	1.28826	0.460886	0	0	0.345989
CG12375	115.863	106.102	111.228	120.101	106.623	76.2751	71.707	75.0842	61.2556	60.8794	84.7249	74.9858	77.2098	106.47
CG12379	6.57693	8.01965	6.13794	12.2101	11.3569	7.97455	6.14244	7.83811	7.44845	8.63012	6.96568	3.47733	0	7.12297
CG1239	10.1954	7.77197	10.5528	19.6404	10.8888	32.1395	9.2304	5.86498	7.34903	7.44028	11.7942	10.1747	6.73149	10.8197
CG12391	29.704	27.8945	32.0023	65.0035	23.9774	41.8824	31.1184	26.1889	22.9612	23.335	47.5632	91.6708	108.959	69.1194
CG12395	0	0	0	0	0	0	0	0	0	0	0	0	0	0
CG12400	241.074	227.799	230.83	587.063	416.499	307.633	300.7	160.184	169.196	165.608	487.972	195.928	162.486	290.082
CG12404	62.8149	89.2541	80.62	78.2225	46.1336	84.4996	52.0774	103.507	90.4783	95.3297	97.584	89.8313	70.3642	140.675
CG12426	0	0	0	0	0	0	0	0.156005	0	0.222042	0	0	0	0
CG12438	0	0.146585	0	0	0	0	0	0	0	0.0758645	0	0	0	0
CG12439	0	0	0	0	0	0	0	0	0	0	0	0	0	0
CG12446	0	0	0	0.0399541	0	0	0.411123	0	0	0	0	0	0	0
CG12448	2.12799	3.06101	2.49229	0.724282	0	1.31399	0.828087	0	0.122373	0	0.835109	0.779044	2.43732	1.67179
CG1246	1.4284	1.13176	0.916475	2.46326	1.19971	2.93098	2.00106	0.46518	0.585718	0.827611	7.10602	5.96605	7.67492	5.46788
CG12464	0	0	0	0	0	0	0	0	0	0.150475	0	0	0	0
CG12470	0.960322	0.634075	0.880218	0.290538	1.24088	0.729822	0.249134	0	0	0.369695	0	0	0	0
CG12479	0	0	0	0	0	0	0	0	0	0	0	0	0	0
CG12496	0	0.0500383	0.0540266	0	0	0	0	0	0	0	0.0933217	0	0	0
CG12498	0.159441	0.0676764	0	0	0	0	0	0	0	0.0689678	0	0	0	0
CG12507	12.4568	14.7002	12.3588	0.0931823	0	0	0	3.33716	1.29289	1.76594	2.72318	0	1.3553	0.588759
CG12511	0	0	0	0	0	0	0	0	0	0	0	0	0	0
CG12512	56.3508	51.2034	53.6443	35.3974	35.7722	20.1593	22.3653	30.676	47.5522	45.012	68.5438	46.7577	51.4043	45.024
CG12516	0	0	0	0	0	0	0	0	0	0	0	0	0	0
CG12517	0	0	0	0.205272	0	0	0	0	0	0.523956	0	0	0	0
CG12531	2.25495	3.4805	2.65402	4.08167	6.50624	8.45653	8.73502	2.29729	2.29821	2.23954	6.8103	54.5543	50.2322	12.3061
CG12540	0	0	0	0	0	0	0	0	0	0	3.67323	0	0	0
CG12541	6.72468	4.63416	5.22107	17.9874	120.986	123.917	188.598	17.1262	16.6551	17.3157	20.4721	16.0718	27.9347	40.3572
CG12576	138.657	178.694	182.445	121.217	93.1168	111.268	88.7362	125.517	144.215	146.247	150.238	178.327	149.36	197.098
CG12589	0	0	0	0.295078	0	0	0	0	0	0	0	0	0	0
CG12590	0	0.0530436	0.0572714	0	0	0	0	0	0	0	0	0	0	0
CG12608	33.2536	34.091	33.7516	51.7951	46.3371	48.9108	59.4378	7.11978	7.62846	7.00286	12.453	14.3527	13.7523	19.3165
CG12609	0	0	0	0	0	0	0	0	0	0	0	0	0	0
CG12617	0	0	0	0	0	0	0	0	0	0	0	0	0	0
CG12620	0	0	0	0	0	0	0	0	0	0.0638858	0	0	0	0
CG12637	0	0	0	0	0	0.243691	0	0	0	0	0	0	0	0
CG12643	6.75552	7.11128	10.8979	6.98989	5.23749	4.62062	2.52369	1.00993	0.847751	1.19786	2.9998	0	12.4415	1.54421
CG12645	0	0	0.0925795	0	0	0	0	0.403972	0.452133	0.574971	0.171418	1.43918	0	0.154421
CG1265	23.5373	24.9367	28.9091	188.679	80.4749	68.7427	72.542	22.6776	24.6002	25.8215	177.354	84.7678	110.519	109.758
CG12655	80.0063	105.412	98.8021	85.3478	59.8427	106.048	69.5806	98.5676	62.364	74.3471	30.6903	5.25855	7.79299	33.4775
CG12659	3.97225	1.92693	2.60064	16.9965	4.03287	2.2641	3.09152	8.74152	4.65321	6.37263	11.1278	13.2165	7.50437	14.1809
CG12661	0	0	0	0	1.84712	0	0	0	0	0	0	0	0	0
CG12674	0	0	0	0	0	0	0	0	0	0	0	0	0	0
CG12679	0.328532	0	0	0	0	0	0	0	0	0.0963358	0	0	0	0
CG12680	0	0	0.0887044	0.527023	0	0	0	0.123004	0	0	1.25266	1.84048	2.81413	2.39797
CG12682	0	0	0	0	0	0	0	0	0	0	0	0	0	0
CG12689	4.61128	4.8694	5.77297	0	0	0	0.2626	1.15132	0.859051	0.819336	0	0	0	0
CG12698	0.143497	0.0304544	0.0328818	0.0488405	0	0	0.167522	0	0	0	0	0	0	0
CG12699	0	0	0	0	0	0	0	0	0	0.12644	0	0	0	0
CG12702	0.645733	0.669997	1.64408	7.61911	0.231774	2.82177	0.167522	0.382743	0.420136	0.4819	0.412269	0	0.932649	0.202577
CG12708	0.154126	0.174455	1.17725	4.12672	2.09112	42.1675	5.39789	0.0656023	0.0550675	0.0466858	0	0	0	0
CG12713	4.11081	3.275	3.47807	13.6041	2.20644	4.65012	3.24859	4.56045	4.80136	4.62062	5.11662	4.9567	8.43391	9.839
CG12716	0	0.507087	0.91251	0.271076	0	0.25535	0	0	0	0	0	0	0	0
CG12721	0	0.308085	0.443521	19.2692	0	5.99875	1.41224	0	0.11998	0.101718	1.09171	3.05525	3.27006	0.327819
CG12729	0	0	0	0	0	0	0.208503	0	0	0	0	0	0	0
CG1273	0.195956	0.0453686	0.0489848	0.460806	0.552448	0.0609225	0.623901	2.08679	2.75525	2.15024	0.221372	0.604041	0	1.42087
CG12730	74.3709	120.78	110.949	65.4594	64.5805	82.937	71.2304	41.1123	53.913	53.6178	52.56	38.4708	38.1947	50.9906
CG12736	39.9257	38.5421	36.0098	61.9352	39.179	30.5853	28.1258	22.3235	26.7628	22.1291	30.7797	26.3229	16.922	20.1187
CG12744	3.25109	2.31834	4.05267	9.73754	0.756164	5.55918	2.42906	2.39858	3.62413	2.84491	13.842	9.57055	12.945	13.2029
CG12746	98.0166	99.8989	102.923	135.785	98.5443	78.1165	88.4631	123.708	120.279	106.956	159.481	152.457	179.351	191.037
CG12768	1.89154	1.97634	1.68931	6.86727	5.73438	6.63474	4.64294	2.3368	2.61539	2.85691	14.3396	21.9011	24.4639	14.9104
CG12773	44.3318	50.8323	53.0356	47.345	26.5648	30.7817	27.7022	52.1759	54.2036	52.372	42.9988	51.0019	44.8997	66.097
CG12782	0	0	0	0	0	0	0	0	0	0	0	0	0	0
CG12788	17.3867	20.6881	20.8348	27.8424	60.7693	67.6241	82.5213	21.6719	20.2973	20.8493	37.0396	39.4618	44.673	49.36
CG12795	26.8106	27.0189	29.5494	51.2806	24.0697	36.7039	24.1946	22.2997	19.7215	19.1993	25.4724	20.8542	21.7247	18.951
CG12796	0.112167	0.0476106	0	0.305417	0.326109	1.0549	0.130946	0	0	0	0	0	0	0
CG12811	69.2886	75.6138	74.9701	84.5638	79.0681	89.5603	54.0853	133.596	112.672	111.397	149.209	103.182	78.2968	105.074
CG12818	8.16386	7.66646	9.13837	16.1309	9.52206	10.3771	5.22921	12.7054	9.78851	9.4134	13.6259	13.7652	7.04491	13.672
CG12825	2.45639	3.55724	3.84077	9.83595	14.5631	37.0612	26.9895	125.42	136.818	123.76	43.7293	58.8957	87.2186	91.3027
CG12826	0	0	0	0.217903	0	1.91578	0	105.614	67.0062	49.8156	35.1748	31.0632	46.8273	11.0318
CG12828	0	0	0	0	0	0	0	0	0	0	0	0	0	0
CG12831	0	0.0681989	0	0	0	0	0	0	0	0	0	0	0	0
CG12848	83.5749	72.126	74.3785	118.267	120.986	87.761	61.536	24.9399	24.3639	24.9396	59.9383	37.2252	54.1071	78.6505
CG12849	0	0	0	0	0	0	0.564897	0	0	0	0	1.58979	0	0
CG12858	10.7858	13.0738	12.8894	24.9817	16.5654	18.4897	46.8597	8.14675	7.94062	8.00169	19.0701	21.4438	24.6459	35.092
CG12859	149.7	144.122	143.457	342.687	321.916	208.75	197.333	108.736	125.215	132.979	318.423	148.441	194.175	212.714
CG12861	0	0.073906	0	0	0	0	0	0	0	0.380909	0	0	0	0
CG12863	5.90405	6.50761	7.11362	12.5756	7.29054	8.22301	5.22497	2.758	3.15249	2.29681	6.34951	2.88496	0.413084	7.33496
CG12866	0.0486145	0	0	0	0	0	0	0	0	0	0	0	0	0
CG12869	4.10065	4.69308	4.39895	2.0677	1.70734	1.09074	2.05671	10.8848	8.76009	8.43823	4.33305	5.03714	5.0029	4.03209
CG12880	0.441361	0.535258	0.462337	0.343363	0	2.69536	1.32494	0.14962	0.188389	1.59715	1.23802	2.07882	8.2943	0.943675
CG12895	79.0931	64.8795	68.2171	165.607	103.924	95.3329	76.9201	16.5064	13.9942	10.9245	69.7612	37.7531	19.1724	100.323
CG12909	10.7367	10.4347	13.0989	31.8558	8.46759	14.4341	7.43412	2.53229	3.51831	2.85851	8.00337	5.97285	3.07346	8.21115
CG1291	36.5104	39.1181	38.4577	38.7498	24.1592	25.4255	16.9575	99.4971	107.432	97.9243	95.9368	64.9026	71.4245	76.991
CG12913	1.42566	1.40654	1.34206	2.93766	2.01644	2.37192	3.3287	0.996813	0.796897	0.540481	9.0638	7.20392	8.77134	11.1045
CG12914	0	0	0	0.111088	0	0	0	0	0	0	0	0	0	0
CG12920	0	0	0	0	0	0	0	0	0	0	4.7278	0	0	0
CG12926	21.8042	14.6161	19.1323	47.9666	24.4807	28.1902	29.1797	23.6989	19.0671	16.4567	17.3285	17.1779	17.7507	16.7388
CG12929	25.4959	20.0269	17.0568	21.7444	23.8564	14.2816	8.89514	11.0686	8.0727	7.23135	18.9409	19.781	8.3027	8.32336
CG12935	11.5294	12.2345	14.8608	20.3565	10.1258	14.786	6.09892	4.8945	6.0694	4.82893	16.9927	21.8755	11.9417	23.4719
CG12948	28.6509	29.1589	30.3477	23.0442	8.64187	17.9305	14.6514	13.5797	10.3251	10.5043	19.7921	13.2515	12.9883	17.9424
CG12963	0	0.278898	0.301128	1.04364	1.48579	0.936284	0.51138	0	0.572193	0.388081	9.02452	13.9879	7.1978	12.9763
CG12975	15.2697	17.0938	16.4568	29.2412	15.2859	15.494	18.4138	14.1445	14.1429	12.5824	28.5974	16.4511	23.7944	36.0188
CG12984	0.106702	0	0.097802	0	0	0	0.249134	0	0.106319	0	0.161234	4.06106	0	0
CG12985	1.51835	1.52765	1.70096	1.14841	1.52595	1.44238	1.0504	0.397693	0.222553	0.235848	1.01252	0.283363	0	0.988134
CG12986	0	0	0	0	0	0.284631	0	0	0	0.280115	0	0	0	0
CG12995	0	0	0.110239	0.327485	0	0	0	0	0	0	0.757425	0	0	0
CG13000	0	0	0	6.43806	0	0	0	0	0	0	0	0	0	0
CG13004	2.89849	5.00906	4.9339	17.8985	22.873	37.5258	26.5866	6.93187	7.29981	5.91964	21.1781	25.0545	23.2894	29.0508
CG13005	7.23909	6.36623	9.13837	9.6195	3.86483	11.3407	4.45327	2.84276	3.57939	2.29538	4.52351	5.84282	5.09912	4.13767
CG13010	0.155276	0.131817	0.569296	0	3.61152	0	0.362545	0.193825	0.650797	0.413806	0.493474	0	0	0.222271
CG13012	7.58085	9.72181	14.1927	63.0231	100.978	123.285	140.471	45.9729	51.0063	51.3507	122.644	107.669	98.1429	137.302
CG13014	25.5603	30.3782	29.9224	25.275	9.90836	7.51448	13.8205	23.7341	31.1635	29.9842	40.7462	31.417	48.0918	36.706
CG13016	13.0572	13.2775	15.9287	28.7111	8.28423	11.1636	14.2563	10.535	11.1755	9.18612	12.8951	9.89844	12.6318	12.6121
CG13018	15.0126	20.123	15.6917	33.7061	10.7203	16.6635	20.2934	8.52829	8.53549	8.40343	24.6357	5.60911	0	28.9637
CG13023	0.101251	0.214885	0.417622	1.03385	3.23807	4.84772	2.12763	0	0	0	0	0	0	0
CG13024	39.2234	39.3859	44.0671	14.7062	13.5573	13.626	9.30276	46.6048	60.3298	53.7913	33.1098	25.1887	19.804	62.2102
CG13026	0.176331	0.149691	0.323244	184.609	141.151	140.808	100.456	0.874697	0.734233	0.311239	195.416	91.1482	74.274	179.299
CG13028	0	0.0954784	0.103089	0	0	0.769271	0	0	0	0.100594	1.07964	0	0	0
CG13029	0	0.122663	0	0	0	0	0	0	0.222169	0.188353	0	0.942912	0	0.809375
CG13033	0	0	0	0	0	0	0	0	0	0	0.74359	0	0	0
CG13041	0	0	0	1.59913	1.30093	1.1477	1.17535	0	0.157914	0.267757	9.33971	0	0.993225	4.74615
CG13045	0	0	0	0	0	0	0	0	0	0	0.169631	0	0	0
CG13046	0	0	0	0	0	0	0	0	0	0	2.31366	0	0	0
CG13054	0	0	0	0	0	0.453232	0	0	0	0	0.103394	0	0	0.279427
CG13055	0	0.0571636	0	0.183349	0.261028	0	0.628881	0.0802033	0.201972	0.17123	0.816784	2.57158	1.41148	1.19567
CG13063	0	0	0	0	0	0	0	0	0	0	2.25479	0	0	0
CG13064	0	0	0	0	0	0	0	0	0	0	0	0	0	0
CG13069	0	0	0.196613	0.292036	0	0	0	0	0	0	0	0	0	0
CG1307	65.1058	73.978	78.2336	109.502	46.3998	44.7604	38.1336	97.1124	115.003	98.6726	92.2795	57.0411	63.666	97.0107
CG13071	0	0	0	0	0	0	0	0	0	0	0	0	0	0
CG13081	0	0	0	0.160042	0	0	0	0	0	0.206903	0	0	0	0
CG13082	0.220764	0.187411	0.404698	3.4564	2.56735	2.26497	2.19065	0.409358	0.458162	0.242766	1.56332	0.145837	2.64154	0.469437
CG13083	0	1.06205	3.50045	2.68932	0	145.693	4.91961	0	0	0.409814	0	0	0	0
CG13088	4.98123	6.2549	6.94369	6.85228	5.22966	6.21076	3.14989	2.26862	2.43328	3.00468	11.9528	12.1231	18.2988	18.211
CG1309	144.656	147.747	147.731	215.267	169.781	159.426	134.062	164.614	151.525	139.881	140.365	126.318	148.509	192.42
CG13090	12.1259	11.6977	11.6197	18.4472	30.1798	25.9184	15.5502	58.8113	57.4445	56.2741	58.4374	45.8565	43.6316	63.548
CG13097	12.6351	11.1531	12.0133	30.7665	5.84828	11.6088	7.63208	4.86775	3.49767	4.01839	8.22907	7.99106	8.84076	11.2537
CG13101	56.2706	91.8168	86.7808	100.037	58.2103	54.1514	68.7468	121.048	201.475	224.578	55.4695	67.1648	35.7395	148.9
CG13108	0.267902	0.151618	0.900369	1.82365	2.2501	4.73366	1.66802	3.18338	2.96908	2.26545	7.05417	3.52832	6.22481	8.78843
CG1311	55.5255	63.2665	60.3885	80.5959	51.8846	58.8518	51.9557	74.4322	77.7046	74.5874	144.121	162.333	171.929	241.102
CG13110	0	0	0	0	0	0	0	0	0	0	0	0	0	0
CG13114	0	1.78294	10.7892	0.664964	0	0.250555	0.11404	0	0.246288	0.542883	0.0747001	0	0	0
CG13116	45.198	41.9192	44.9866	136.894	103.234	88.5214	98.7893	41.5755	34.2795	31.7755	163.629	112.007	119.06	178.155
CG13117	27.6166	41.2684	41.2636	46.6116	53.8939	41.7242	45.9313	35.2656	27.2807	30.0177	85.6777	61.5865	52.7333	77.711
CG13126	7.77454	8.35487	8.48533	20.802	11.7589	16.752	8.49906	1.96807	1.7438	1.55619	3.54922	4.44055	5.0029	2.75844
CG13127	0.0283474	0.0721944	0.0519657	0	0	0	0	0	0	0	0	0	0	0
CG13133	4.98601	5.8607	5.36109	85.3742	29.7355	23.7738	28.4322	2.55849	1.26906	1.98627	109.255	18.1468	25.5831	33.074
CG13148	0.281176	0.190957	0.0515443	0.459365	0	0.0961589	0.1313	0	0.117037	0.0496116	0.354978	0	0	0
CG13151	7.95762	6.7554	6.75711	8.01986	3.93939	2.94526	2.41297	4.69409	7.41913	6.0792	11.628	4.42934	3.7956	7.6623
CG13154	0	0	0.0775258	0	0	0.433888	0	0	0	0	1.22646	0	0	0
CG13157	0	0	0	0	0	0	0	0	0	0	0	0	0	0
CG13168	0.0577972	0.0981306	0.0529761	0	0	0.395319	0.134947	0	0	0.0507171	0.272167	0	0	0.24518
CG13170	0	0	0.163003	0	0	0.304092	0.415223	0	0	0	0.821074	0	0	0
CG13171	0	0	0	0	0	0	0	0	0	0	0	0	0	0
CG13177	0.462378	0.392523	0.847617	965.026	1129.2	669.276	521.437	3.73712	2.41307	1.63662	1032.7	663.026	556.503	653.059
CG13183	0.241381	0.163931	0.309745	0.788699	0.842131	0.330197	1.01445	0.117632	0.296225	0.167425	0.823591	11.4407	7.24559	1.41641
CG13185	5.31283	6.2682	6.72988	5.80288	5.02102	7.44927	5.22207	3.11989	3.68899	3.76092	2.53756	3.03221	2.62701	4.51873
CG13186	0	0	0	0	0	0	0	0	0.150184	0.127325	0	0	0	0.820695
CG1319	71.3185	69.6084	75.6584	96.9097	68.4526	66.9443	59.448	79.1272	74.3852	64.0278	91.8841	41.6505	69.4775	98.706
CG13192	19.5186	21.3822	20.9018	38.5885	17.9794	15.2009	15.0406	5.56194	7.13654	5.93723	8.29403	4.41587	7.41114	6.37823
CG13193	0	0.280374	0	0.149881	1.0669	0	0.514086	0	0	0	0	0	0	0
CG13197	32.2114	30.5893	34.5843	58.7196	42.2099	66.0749	34.9841	33.537	28.7319	30.9035	63.0259	71.539	56.4653	106.892
CG13204	9.32015	8.02887	8.63729	14.1871	16.3314	10.0562	13.4903	4.06176	4.71003	3.48653	15.032	16.3798	22.4763	20.5523
CG13215	0.358742	0.152272	0.328818	0.488405	0	0	0	19.8005	11.0183	10.9245	0.566422	0	0	0
CG13216	0	0	0	0	0	0	0.188299	0	0	0	1.79516	0	0	0
CG13220	99.5472	99.7468	101.839	205.698	170.541	152.779	102.878	87.3591	73.4716	69.5955	185.345	99.3035	92.4222	126.046
CG13228	0	0	0	0	0	0	0	0	0	0	0	0	0	0
CG13229	3.8699	4.30922	3.68529	1.23163	0.292237	1.46096	0.704074	6.00904	7.48813	5.2903	2.44467	4.76707	0.654134	3.19683
CG13230	0	0	0	0.393437	0	0	0	0	0	0	0	0	0	0
CG13231	0.20807	0.176635	0	0.283274	1.61314	0	0	0	0.212637	0	0.322468	0	0	0
CG13239	0.68444	0.232415	0.250939	0.186365	1.3266	2.57478	1.59806	0	0	0	0	0	0	0
CG1324	0	0	0	0	0	0	0	0	0	0.254649	0	0	0	0
CG13244	0	0.173172	0	0	0	0	0	0	0	0	0	0	0	0
CG13247	1.49511	0.687505	1.3133	3.13807	3.86383	6.07183	2.61815	0	0.066081	0.0560229	1.00213	0	0.554168	0.451383
CG13248	7.8065	8.13209	9.06531	14.1426	12.1166	10.4237	11.764	2.38272	2.42633	1.89024	9.74591	6.67956	3.98705	14.7819
CG13255	18.9437	27.418	21.6332	89.2103	56.5806	56.8198	52.9316	53.3019	45.0406	39.9552	120.778	84.3121	62.5364	85.9821
CG13258	0.407981	0.173172	0.654411	0.833161	0.19769	0.174406	0.714428	0.376249	0.631657	0.714018	1.75619	1.34041	0	0.287645
CG13272	0	0	0	0	0	0	0	0	0	0	2.75288	0	0	0
CG13282	0.343917	0.364949	0.31523	3.86283	3.66624	4.92517	3.1116	0.479717	0.492166	0.606915	9.43152	9.57055	4.12741	12.4083
CG13285	6.72549	8.1181	7.89825	22.0324	31.7741	26.5942	17.9113	42.0787	31.942	35.9528	61.0053	47.1934	46.6261	73.7219
CG13293	1.87576	2.86037	2.35606	6.00599	30.0277	35.6382	48.0944	2.5024	1.95568	1.75013	7.57936	126.439	124.904	10.3902
CG13295	24.4965	26.4407	28.0369	29.0868	24.1972	22.741	23.3389	22.789	23.6461	23.0503	35.0539	21.5372	24.1377	24.6213
CG13296	0	0	0	0	0	0	0	0.0554987	0	0	0	0	0	0
CG13297	0	0.365452	0.394581	0	0	0	0	0.752497	1.26331	1.07102	51.7277	0	0	0
CG13298	97.5004	86.274	94.8841	137.423	124.319	122.321	83.1098	70.7849	67.8296	68.278	97.1649	106.188	78.4207	126.406
CG13305	0	0	0	0.087701	0	0.771057	0	0	0	0	0.310183	0	0	0
CG13306	2.43486	1.69119	4.46352	19.5881	11.1548	5.67747	9.81959	2.27985	1.48846	2.16326	47.4028	25.4494	25.8566	33.1163
CG13309	0	0	0	0	0	0	0	0	0	0.0791631	0	0	0	0
CG13310	1.08965	0.572632	0.237798	0.070642	0	0	0	2.11075	0.912747	2.04834	0.244269	0	0	0.220049
CG13311	0	0	0	0	0	0	0	0	0	0.11823	0	0	0	0
CG13312	0	0	0.0557644	0	0	0	0	0	0	0	0	0	0	0.174124
CG13313	0.250687	0.170251	0.275731	0.204777	0	0	0	0	0	0.0432481	0.232085	0	0	0.348454
CG13314	0.165135	0.42056	0.605441	3.37231	0.960208	2.54134	1.15669	0.409358	0.171811	0	3.12665	0.875022	11.5267	2.11247
CG13315	72.3722	51.1986	82.3662	12.3163	0	19.0785	6.33667	20.3937	17.1188	28.2347	19.3528	5.54814	6.52554	1.70086
CG13318	11.4567	9.68223	11.5841	2.44805	1.49366	3.95319	2.03921	66.0682	58.994	54.9801	14.5641	14.2433	14.1606	9.87606
CG13321	0	0.864647	0.133366	1.18856	0.705048	3.85644	0.509591	0.0897715	0.301422	0.4472	14.2848	0	0	0.720627
CG13323	0.185777	1.26168	0.340561	0.505847	0	2.22367	0	0	0.19348	0.164031	0.293416	0	0	0
CG13326	0.0479977	0	0	0.0653459	0	0	0	0	0	0	0	0	0	0
CG13330	0	0.0289092	0.0312134	0.0927251	0.264017	0	0.238532	0.0417372	0	0	0	0	0	0
CG13332	39.5481	44.9731	56.8085	9.44248	4.29029	6.81296	7.92457	1.50499	1.1054	1.47266	7.66336	10.0531	11.2565	11.4339
CG13334	0	0.0489294	0.0528294	0.0784694	0	0	0	0	0	0.202869	0	0.304673	0	0
CG13339	36.5491	32.5381	35.1315	56.2822	49.0843	62.9651	50.4987	25.4155	19.3429	21.1013	34.7261	41.6505	40.2552	54.0164
CG13344	7.67747	7.98165	10.4536	24.0102	10.9987	23.4021	11.8205	12.101	11.841	10.7768	16.3727	20.3974	20.3226	26.0093
CG13358	0.138253	0	0.0633602	0	0	0	0	0.335539	0.281657	0.119393	0.213569	0	0	0.76957
CG13360	12.7017	13.1742	19.5697	31.1534	36.2096	35.3253	37.1571	7.43181	5.06228	5.8524	3.17938	7.81269	2.68013	2.37513
CG13361	0.130588	0	0.119695	0	0	0	0	0	0.0432991	0	0.131328	0	0	0.41407
CG13362	0	0	0.236912	0.175947	0	0.220986	0.301745	0	0.0699557	0	0.106089	0	0	0.0955699
CG13365	45.0818	50.9763	52.0282	102.625	61.9081	51.8077	57.9564	27.8491	30.4089	29.3253	52.1684	45.4934	27.4939	51.15
CG13367	24.0709	23.8544	26.0829	35.2011	29.5546	32.1779	27.3863	7.2929	6.87445	5.87065	12.9364	8.30556	4.62886	8.08902
CG13369	61.3944	70.2475	72.9607	84.1438	48.819	63.4332	40.2712	31.7085	41.6148	39.7579	58.0908	34.7857	45.912	38.3823
CG13373	11.4027	14.5699	14.3305	32.0084	12.3037	9.84949	10.4298	7.57542	5.63904	5.8996	10.7352	12.832	10.3133	19.3413
CG13375	1.08795	1.84717	2.30602	3.24007	4.21738	2.32541	2.85771	1.22611	0.411687	0.930732	1.24867	1.22307	0.863122	3.09334
CG13377	153.72	190.07	207.474	85.154	77.3578	98.1112	75.8159	82.4921	100.093	129.108	44.5114	37.4536	46.2541	55.0345
CG13384	28.6636	36.5364	35.2544	44.9596	33.0494	36.3169	36.4862	20.0047	21.4321	19.4438	50.3282	36.9094	39.838	59.6457
CG1339	0.198162	0.21028	0.272448	0.0674464	0	0	0	0.0610618	0.153768	0.0434546	0.0777309	0	0	0
CG13390	13.7075	12.332	11.4128	16.9519	13.1253	8.40444	10.5833	3.02979	2.48673	3.11443	9.59936	7.62766	5.92449	5.09587
CG13392	23.2329	17.7427	19.4135	28.2005	17.7229	8.45594	15.0318	11.9857	17.2197	14.8448	30.2219	15.0271	12.9805	20.6172
CG13397	27.4663	23.3848	27.7001	28.5459	5.75384	25.1064	5.05793	0.297115	0.637362	0.399389	0.840497	0.352832	0.290492	0.0378579
CG13398	9.03831	10.67	10.2261	13.0101	14.5075	9.5789	8.02358	7.62349	10.6655	8.67218	10.7339	7.03672	7.0131	10.9942
CG13403	0	0.894354	0.362115	0	0	0	0	0	0	0	0.638613	0	0	0
CG13405	0.109511	0	0	0.447276	1.27354	2.24708	1.27845	0	0.111277	0.377356	0.168753	1.13345	0	0
CG13408	1.37634	1.23713	1.40995	2.42492	7.68913	11.9057	11.3419	0.0972812	0.326636	0.484609	2.47675	14.556	11.813	2.11961
CG13409	5.05911	6.39374	6.31067	13.4129	11.1328	6.76452	10.3912	5.24819	5.15275	5.40221	14.2565	16.5269	15.9159	18.0553
CG13426	1.38713	3.19626	1.63469	0	0	0.677692	0.925355	0.246009	0	0	0	0	0	0
CG13436	0.541849	0.245327	0.397321	0.639335	0	0.864762	0.337368	0.444955	0.0747003	0.189991	0.79299	0.380444	0.704758	0.816413
CG13437	10.194	13.2773	12.4156	21.2931	13.8038	13.6107	21.1931	5.60765	6.76653	3.99068	23.4231	17.2308	18.8123	25.3207
CG13443	0	0	0	0	0	0	0	0	0	0	0	0	0	0
CG13445	0	0	0	0	0	0	0	0	0.249725	0	0	0	0	0
CG13454	0	0	0	3.28801	0	0	0	0.46518	0.195239	0.165522	0	0.994344	0	0
CG13458	1.34557	1.83879	2.88778	19.0339	21.691	21.437	11.1108	0.078966	0.0662852	0.112392	21.0092	14.8538	12.6462	16.6169
CG13465	0	0	0	5.08442	0	0	0	0	0	0	0	0	0	0
CG13473	0	0.127076	0.274409	0.611384	4.64215	0	4.19405	0.564373	0.157914	0.267757	0	0	0	0
CG13477	0	0.312629	0	0	0	0	0.429921	0	0	0	0	0	0	1.07669
CG13484	16.9487	14.7391	16.798	32.4546	20.832	19.5566	23.1644	10.6043	7.77104	7.54652	21.8557	14.032	16.8848	20.4607
CG13488	1.31412	0.650761	0.501879	10.4364	5.09416	1.49806	5.88087	0	0	0	0.981992	0	0	0
CG13500	0.0515025	0	0.0472065	0.140235	0	0	0.12025	0	0	0	0	0	0	0
CG13501	0	0	0	0.0685895	0	0	0	0	0	0	0.237154	0	1.09287	0.284853
CG13506	53.8997	60.0839	72.4561	194.012	137.824	202.085	168.634	72.8345	77.9385	82.0805	244.269	244.115	200.802	367.044
CG13510	16.2908	16.8419	19.5149	36.0132	55.3347	49.9206	34.2704	14.5914	7.04692	8.81922	26.2081	8.9724	10.9048	13.2946
CG13516	47.3112	45.4205	48.7002	55.4746	19.6842	57.6038	42.5085	59.7501	53.8218	53.6232	66.1315	52.688	38.1624	61.1843
CG13526	0	0	0	0	0	0	0	0	0	0.119003	0.425742	0	0	0
CG13531	17.3334	21.206	21.8454	15.7011	12.8874	13.8982	11.2687	26.5722	29.0061	28.4755	25.5132	27.5857	23.1584	37.0711
CG13532	5.45887	5.64159	5.22107	12.8174	4.75357	12.5811	9.60539	8.00751	8.36102	8.13081	9.69619	15.8639	10.6551	12.7662
CG13538	0.328532	0.0929661	0.301128	0	0	0	0	0	0	0	0	0	0	0
CG13539	0	0	0	0	0	0	0	0	0	0	0	0	0	0
CG13541	0	0	0	0	0	0	0	0	0	0	0	0	0	0
CG13544	0.226779	0	0	0	0	0	0	0	0	0.0510013	0	0	0	0
CG13557	0	0	0	0	0	0	0	0	0	0	0	0	0	0
CG13558	0	0	0	0.290538	0	0	0	0	0	0	1.23485	0.777568	1.28037	1.11241
CG13559	0.365035	0.154943	0.669172	0.993945	2.83008	0	0.42615	0.224429	0.376778	0.159715	0.285696	1.43918	0	0.772101
CG13563	0.67886	0.691559	0.715567	1.84845	2.82893	3.77263	1.03027	0.469839	0.39439	0.395154	10.1133	15.3384	17.5144	27.2826
CG13564	0	0	0	0	0	0	0	0	0	0	2.44269	0	0	0
CG13565	0.156444	0.531236	0.573578	1.49092	1.81934	0	1.82635	0	0	0.133878	0	0	0	0
CG13566	0.20601	0.349773	0.283239	1.26212	0.598942	0	1.68351	0.273635	0.574234	0.584197	1.74167	3.21699	0	3.45175
CG13575	3.155	4.88205	5.05154	2.44671	1.2385	0.887763	2.51764	1.47889	1.28279	0.947207	1.00406	0.948363	0.867557	0.961033
CG13578	129.434	127.177	130.87	110.575	52.5664	141.334	85.7708	57.9537	43.7662	40.6909	73.0341	53.446	72.3148	77.5728
CG1358	2.28791	2.52859	3.40278	7.4051	0.753026	9.00542	3.02372	16.1842	11.8815	12.4297	24.546	28.0866	20.4921	15.1906
CG13581	0	0	0	0	0	0	0	0	0	0	0	0	0	0
CG13585	268.6	258.851	268.733	364.394	327.029	287.218	216.849	201.393	164.717	177.564	376.489	276.456	237.937	408.874
CG13599	2.1865	2.0358	2.45666	13.5396	3.00757	2.65334	1.97618	0.263762	0.442811	0.875963	1.45499	0	0	2.11731
CG1360	5.42791	4.86387	4.62965	8.62138	4.38356	8.50797	4.22444	4.27966	4.37336	4.63463	8.40879	10.1423	7.20419	15.5768
CG13601	34.5151	36.6431	37.6193	58.2101	36.6912	35.9974	27.053	21.641	17.9111	19.6468	36.9461	35.8829	32.5684	56.0125
CG13605	29.4533	35.9607	36.4894	40.4376	20.4959	28.4524	25.1983	30.1417	35.6476	33.4114	35.9926	27.7036	39.176	41.5469
CG13607	14.7859	14.5255	19.4905	0.363172	0.0738622	1.62906	0.177953	1.31205	1.21935	2.16755	0.596507	0	0	0
CG13613	0	0	0	0	0	0	0	0	0	0	0	0	0	0
CG13622	0.594486	0.883178	0.817345	0.202339	1.15225	0.508268	0	1.4465	1.51776	1.60843	0.575428	0	0	0.207349
CG13623	24.1002	26.4318	26.0688	47.688	40.0386	31.9953	22.3682	46.9057	41.2408	48.6851	93.2236	37.6482	55.7933	66.5462
CG13630	42.7823	45.1034	43.4461	60.442	44.7498	24.5437	24.0307	24.4815	24.6601	24.2439	55.2185	25.3544	35.6811	38.1181
CG13634	0.180147	0.191164	0.0825601	0	0	0.462062	0.210308	0	0	0	0.542821	1.13935	0	0
CG13639	29.552	30.7192	19.9006	9.85303	11.105	4.12507	2.8163	0.852829	0	0.606915	1.44752	0	0	1.95599
CG13640	2.67969	2.54248	2.60064	0.858407	0	1.34769	0.368038	0	0	0.267757	0.23948	0	0.993225	0.215734
CG13653	0	0	0	1.56705	0	0.605596	0	0	0	0	0	0	0	0
CG13663	53.722	47.4021	47.1937	72.339	65.6196	49.8505	40.6214	61.2002	50.0301	53.0706	61.2524	47.8528	48.352	74.85
CG13667	11.1543	11.806	10.9775	14.1151	8.10732	8.98639	8.76464	5.59257	5.80342	6.4243	7.79196	6.02425	2.86742	8.58481
CG13671	19.1973	21.1051	19.9457	22.7675	13.0577	16.2092	12.2497	17.7551	19.0078	16.7163	18.9052	19.0153	15.2675	25.2929
CG13676	0.35346	0.20004	0.302378	1.02659	0.639413	1.00733	0.880292	0.761107	0.737171	0.479144	21.7626	9.38596	7.00636	16.5498
CG13685	8.85761	6.52627	6.89328	10.2388	110.783	111.88	207.397	3.14735	2.81238	1.66179	8.27156	21.7019	38.4153	7.68425
CG13689	19.2426	16.9995	17.7809	36.634	21.5289	20.5982	18.6289	20.8818	15.9493	13.9234	19.8768	17.6934	13.243	19.4161
CG13690	0.0599626	0.356325	2.30835	25.9601	2.09198	65.7233	10.6402	2.51412	2.73109	3.31523	9.88373	5.37405	4.42454	11.702
CG13692	2.69521	0.823686	0.889338	3.08226	4.59705	0.184346	1.76201	0	0.335568	0	1.01779	1.70903	0	0.611246
CG13704	7.34365	4.286	6.87131	0	0	1.83126	0	1.14559	0.641085	0.40763	9.96522	0	0	0
CG1371	51.1412	46.538	51.0744	55.0956	90.7817	142.731	73.216	28.2972	23.2332	23.3293	30.8565	24.5142	27.5494	40.875
CG13712	0	0	0	7.02134	0	0	0	0	0.183558	0	0	0	0	0
CG13713	0.210172	0	0.577921	8.29794	0	0	0	0.266509	0.447423	0	0	1.70903	0	0
CG13723	0	0	0	0	0	0	0	0	0	0	0	0	0	0
CG13724	0	0	0	0	0	0	0	0	0	0	0.0586834	0	0	0
CG13725	0	0	0	0	0	0	0	0	0	0	0	0	0	0
CG13728	0	0	0.0253272	0	0	0	0	0	0	0	0.0429674	0	0	0.0387069
CG13737	2.66756	2.94392	2.68955	0	0	0	0	12.6605	13.2844	12.5763	13.0949	0	0	1.51236
CG13742	6.771	6.41414	10.3348	9.85133	4.28071	7.65242	6.71722	0.17381	0.291798	0.296861	0.132756	0.222917	1.52943	0.159455
CG13747	0	0	0	0	0	0	0	0	0	0.0823869	0	0	0	0
CG13748	1.1048	0.468943	0.337547	0	0	1.88914	0	0.448858	1.31872	2.55543	25.4269	11.5134	24.883	22.1336
CG13751	85.6597	90.8412	73.5609	148.627	156.077	97.9572	108.519	51.7028	46.3084	56.5189	101.1	27.9141	29.5484	25.0611
CG13759	0.273776	0	0.0836466	0.372729	0	0	0.213075	0.112709	0	0.0802091	0.430431	0	0	0
CG13766	10.1063	10.5981	11.1401	19.6044	9.08997	16.0387	12.4923	4.615	6.18464	5.24329	10.3067	10.2109	8.97674	8.82053
CG13771	0	0.0391652	0	0.188431	0	0.552221	0	0	0	0.0401045	0	0	0	0.0646252
CG13773	12.6652	12.0084	12.8901	26.536	70.1369	131.909	99.2744	16.2444	13.8062	14.0169	21.3251	86.3737	88.4443	31.552
CG13786	0	0	0	0	0	0.746007	0	0	0	0	0	0	0	0
CG13801	0	0	0	0	0	0	0	0	0	0.0266972	0	0	0	0
CG13806	0	0	0	0.286136	0	0	0	0	0	0.0615119	1.65047	0	0	0
CG13807	46.7546	36.5739	37.021	72.9849	39.8543	53.3682	29.4345	14.0495	11.9175	9.57732	25.0388	8.85138	9.89014	27.3047
CG13810	0.212316	0.036048	0.0778422	0.693734	0.493821	0.145219	0.396581	0	0	0	0.799246	0	0	0.12
CG13829	0.394446	1.2557	0.542315	0	0	0	0.230242	0	0	0.0842938	0	0	0	0
CG13837	0	0	0	0	0	0	0	0	0	0	0.444126	0	1.43266	0.533452
CG13838	0	0	0	0.933871	0	2.34585	0.533858	0	0	0	1.09784	0	1.01182	0.988988
CG13841	379.381	381.385	327.075	313.727	251.719	261.504	210.923	66.8647	72.0091	70.9938	155.183	210.483	110.484	327.669
CG13843	0	0.146383	0	0.234758	0	0	0.268404	0.354362	0.416439	0.302617	0.360878	1.51493	1.87089	1.62547
CG13856	74.5307	76.2614	68.1124	30.8755	22.4048	30.3079	18.7642	8.27216	12.2939	12.2563	19.5071	16.5227	13.6034	19.2834
CG13857	0	0	0	5.88085	7.42897	6.24189	4.40355	0	0	0	0	0	0	0.257367
CG13862	0	0	0	0	0	0	0	0	0	0	0	0	0	0
CG13865	73.2941	77.1617	75.8552	113.203	90.9671	68.75	59.9046	47.3902	41.6511	41.0358	82.9036	68.5682	71.1209	114.025
CG13868	170.594	198.453	204.79	670.056	256.932	463.068	423.204	131.996	170.517	168.292	549.405	377.412	460.236	458.711
CG13870	0.111865	0.18993	0.0683561	1.06609	1.15638	1.78531	0.957692	0	0	0.0319429	0.057139	0	0	0
CG13872	0	0.0288149	0	0.0462112	0	0.232162	0.0792514	0	0	0	0	0	0	0
CG13875	5.95098	5.70613	6.08244	7.22758	5.47674	7.10112	5.89771	14.253	15.7691	16.2003	6.15482	6.67463	4.34307	9.58744
CG13887	289.017	306.091	312.336	371.736	341.379	244.214	228.629	540.664	570.495	566.194	500.735	403.542	395.715	641.082
CG13891	0.26338	0	0.24141	0.537863	9.18883	1.35109	6.45698	0	0	0.233429	0	0	0	0
CG13893	38.2911	38.582	39.2206	68.2086	38.446	53.4994	38.077	162.104	139.652	124.844	268.696	212.775	221.144	287.438
CG13895	11.8838	12.991	13.5296	16.8035	17.8611	15.0444	14.6035	10.541	9.19189	7.93843	21.1049	24.9381	18.1005	33.2127
CG13898	0	0	0.126301	0.375198	0	0	0	0	0	0	0	0	0	0
CG13900	53.9931	55.1642	59.9342	70.6917	28.3319	78.5517	37.9701	46.3074	49.8195	44.3602	47.5787	63.9673	67.0985	78.9496
CG13901	13.7776	13.2078	12.1988	25.9031	13.2613	9.77615	8.09686	17.2495	23.8086	19.3608	27.2639	15.3426	16.5028	33.1899
CG13902	19.3023	17.5314	18.4056	31.2944	24.4386	18.4548	15.7495	9.12828	9.87478	9.60693	8.01957	10.4431	9.16362	9.73082
CG13905	0	0.0742165	0	0	0	0	0	0	0	0	0	0	0	0
CG13907	35.1373	52.4061	46.2061	94.4596	69.7351	60.4316	57.9878	83.4247	99.3644	94.2017	145.745	128.188	142.023	197.335
CG13912	11.6879	6.324	7.41668	1.39889	0	1.09811	1.19953	4.23799	3.29391	3.90957	6.9934	9.05889	2.76234	8.09995
CG13917	63.338	78.974	73.4991	72.2287	273.392	337.989	458.405	38.4715	45.5543	45.5142	61.4008	131.103	128.454	103.747
CG13919	27.3191	23.866	23.4389	20.7591	20.0104	22.2706	14.4631	28.7338	21.4763	21.5688	24.3017	15.986	16.6251	34.5308
CG13920	16.9057	17.9947	28.7263	149.781	65.5342	40.4709	62.8518	7.88463	16.6138	14.085	387.963	164.754	153.486	187.111
CG13924	0.589672	0.500586	0.424667	1.77764	1.06128	0.720218	1.77015	0.461451	0.301271	0.437855	2.87184	1.75354	1.26326	0.293986
CG13926	19.7508	16.4083	19.5555	27.1771	16.5819	13.5453	17.2623	21.4078	21.4763	21.1801	35.0619	41.0167	23.6617	43.2613
CG13931	0.120971	0	0.11088	1.97633	0.703408	0	0	0	0	0	0	0	0	0.905554
CG1394	0	0.211539	0	0.169626	0	0.639139	0	0	0	0.339269	0.202293	0	0	0
CG13949	2.43944	1.70544	2.49901	4.1026	6.39697	2.69908	5.02564	1.85398	0.778129	0.263876	4.72018	3.56666	0	4.25215
CG13955	10.9779	7.58555	8.89218	24.3304	11.9997	18.8808	13.71	0	0	0	0.200426	0	0	0.180553
CG13957	10.8756	11.3162	11.6298	12.0044	7.1728	7.65169	7.31802	17.7962	17.4798	16.3982	18.3294	15.6607	18.1	26.7954
CG13970	0.101498	0.172327	0	0	0	0	0	0	0	0	0	0	0	0
CG13983	0	0	0	0	0	0	0	0.533019	0.536908	0.68278	2.03558	1.82296	1.50087	1.58925
CG13992	0.0947208	0.107214	0.491979	1.97734	0.305984	3.02338	0.368596	0	0.496371	0.112218	0	0	0	0.271246
CG13993	48.2194	34.0654	38.8996	73.0668	32.0069	41.5086	32.0019	487.791	337.812	364.149	791.807	4528.42	4146.84	818.63
CG13994	36.891	28.9335	28.3146	53.7005	36.8648	36.8884	26.2278	57.9708	47.1664	51.05	105.129	66.4573	54.7153	115.503
CG13998	0	0	0.196613	0	0	0	0	0	0	0	0	0	0	0
CG14000	0	0	0	0	0	0	0	0	0	0	0	0	0	0
CG14005	16.4093	18.5551	14.1983	33.9572	24.5534	29.0691	17.011	18.3561	18.7492	19.5947	15.8194	18.7505	15.7234	14.0645
CG14010	5.45606	6.79064	7.33189	23.2915	29.3055	49.6522	27.8531	3.25522	4.21857	3.9016	21.4463	37.4766	32.3625	52.9165
CG14013	0	0	0	0	0	0	0	0	0	0.0758645	0	2.50658	0	0
CG14014	0	0	0	20.8138	0	0	0	0	0	0	0	0	0	0
CG1402	0.18745	0.265218	0.0572714	2.04162	35.6055	41.8825	53.9789	0.158912	0.20009	0.11309	3.43899	16.8142	12.8646	6.37823
CG14020	3.45773	3.75929	5.00416	8.17615	7.28974	4.97895	4.67399	1.99882	1.61073	1.47935	7.2263	9.05784	7.45746	10.1773
CG14022	13.8027	13.4662	19.4491	136.589	33.94	82.7824	50.5051	2.30264	2.14763	4.18772	131.906	27.8913	41.4241	36.6748
CG14024	1.45274	0.875219	0.987935	1.40361	1.81661	1.44238	2.29776	1.28216	0.684893	0.87097	1.85474	0.622881	1.64104	0.868834
CG14034	0.554033	1.30647	1.57988	0.586663	0.954526	0	0.287463	0.147889	0.248281	0.0526227	1.60022	2.52897	1.30133	0.763175
CG14036	0	0	2.25576	30.7642	0	9.56419	1.04475	0	0.933757	0	0.354014	0	0	1.59455
CG14040	18.1793	24.4922	23.5443	27.3054	19.125	14.6717	14.7747	25.9163	24.2582	20.5188	27.2535	16.86	16.3307	30.1759
CG14044	10.1282	9.53269	9.93931	9.06779	6.72146	10.2595	7.83981	2.75727	2.85275	2.73796	5.87716	4.11195	7.67364	6.76508
CG14050	3.05276	4.16014	3.53447	4.70302	1.08997	6.04428	4.12658	0.300999	0.421105	0.214205	2.29901	1.07233	2.82517	2.53128
CG14062	0	0	0	0.0818713	0	0	0	0	0	0	0.0989946	0	0	0
CG14069	0	0	0	0	0	0	0	86.4772	26.6306	34.0479	0.651386	0	5.8534	2.05379
CG14070	0	0	0	0	0	0	0	0.562306	0.39334	0.400164	0.119301	0	0	0
CG14071	0.305985	0	0	0	0	0	0	0	0	0.53948	0	0	0	0.434664
CG14072	0.171959	0.145979	0	0	0	0	0	0	0	0	0.547382	0	0	0
CG14077	0	0	0	0	0	0	0	0.174641	0	0.372849	0	0	0	0
CG14089	0	0	0.0851405	0	0	0	0.43376	0	0.0941946	0	0	0.959454	0	0
CG1409	0	0	0	0	0	0	0	0	0	0	0	0	0	0
CG14102	7.45469	6.96927	8.25996	7.83663	5.57835	7.58368	5.39789	3.7882	4.01152	3.48389	5.41584	5.97966	4.41032	6.88383
CG14106	0.370451	0.104828	0.0565917	0.840578	0.598349	0.105575	0.720788	0.240611	0.201972	0.399536	4.59441	1.71438	2.11722	1.47159
CG14107	0	0	0	0.232192	0	0.729073	0	0	0.0869489	0	3.82392	0	0	0
CG14110	0	0	0	0.0814007	0	0	0	0	0	0	0.17605	0	0	0
CG14131	3.65184	3.82109	3.32128	0.886434	0.054869	1.01654	0.132193	1.57284	1.67234	1.39292	0.533922	0.597693	1.04569	0.721472
CG14132	2.46863	6.73611	7.91948	73.2193	68.3538	60.906	68.343	13.592	12.7516	18.2074	41.0508	52.4101	48.7784	102.383
CG14135	16.4824	19.6031	18.8471	20.8846	13.7592	16.743	15.4316	10.8359	10.0223	8.06838	12.6446	11.3667	21.3654	17.3738
CG14137	0	0	0	0.275024	0	2.07255	0.471662	0.263762	0	0.187706	0	0	0	2.11731
CG14147	0	0	0	0	0	0	0	0.341132	0.143175	0.121383	20.193	0	0	0
CG14154	0	0	0	0.116096	0	0	0	0	0	0	0	0	0	0
CG1416	126.37	100.891	126.065	177.167	108.682	87.2384	95.1036	71.5795	56.2912	54.778	80.1705	65.7514	60.0349	63.2771
CG14174	10.9732	9.72255	11.322	12.0004	4.30018	7.17727	5.60013	1.09963	0.430758	0.730383	3.91951	1.25361	3.74143	3.53087
CG1418	44.6327	44.4791	48.9137	35.8129	36.7764	37.0535	34.2333	80.2194	65.8832	62.9676	62.4244	56.3979	60.7385	79.0036
CG14183	0.644254	0.425383	0.699867	1.23445	1.47995	3.59051	2.7299	0.293742	0.517799	0.125424	0.710466	6.96954	3.67033	0.808446
CG14184	110.277	92.6355	96.0987	151.552	124.123	163.861	84.747	98.7664	85.1855	80.3572	139.193	128.32	144.385	193.25
CG14185	0.207035	0.527269	0.806503	2.25492	0	0.442523	0.604243	0.388631	1.08741	0.921895	7.42085	3.18442	7.1814	5.57085
CG14187	0	0.700933	1.81632	1.1241	0	0	0	0	0.360947	0.459011	0	0	0.378371	0.493107
CG14194	30.2224	46.7738	44.8018	70.1857	26.4727	26.8332	34.1968	25.9432	34.1696	28.4077	42.9695	45.6507	44.3956	56.7894
CG14195	0	0	0	0	0	0.289729	0	0	0	0	0.15836	0	0	0
CG14196	10.6116	11.2164	11.9832	46.1737	27.9612	35.4602	27.5293	4.27827	5.01352	4.58201	17.9562	13.2195	10.0638	19.3818
CG14212	0.476497	0.33709	0.363958	0.648721	0	0.678984	0.185423	0	0	0	0	0.900229	0	0
CG14229	34.7438	29.9947	27.5276	45.9654	24.7299	23.1598	25.2072	8.52829	7.56783	7.80319	13.6481	11.4586	3.00174	24.5896
CG14231	5.95213	9.11247	9.09271	11.8435	4.83156	6.52423	6.29535	2.98077	4.95207	4.15413	7.43085	7.3007	5.79221	7.76224
CG14232	16.4722	18.5099	21.2169	34.5241	15.9634	23.6451	23.9869	23.9858	23.4897	24.2008	28.7695	26.2051	23.3574	32.8851
CG14244	0	0	0	0	0	0	0	0	0	0	0	0	0	0
CG14247	0	0	0	0	0	0	0	0	0	0	0	0	0	0
CG14258	2.09683	1.23234	1.4784	1.20776	0	0	0.376598	1.79194	1.00279	0.566767	1.14056	1.27678	2.10239	1.48412
CG14259	1120.77	1366.69	1326.03	875.896	679.03	540.329	548.512	453.616	480.09	479.463	373.232	328.517	292.591	431.965
CG14260	0.501374	0	0.153184	0.568824	0	0.42866	0.195105	0	0	0	0	0.211972	0	0
CG14269	0.109511	0	0	0	0	0	0	0.269315	0	0.287486	0.171418	1.15134	0	0
CG1427	53.8457	60.2333	58.9696	64.5961	40.5818	62.5978	56.4069	21.5621	27.7346	22.5207	34.5494	24.8794	38.5129	58.5567
CG14270	32.4633	27.5588	27.9581	53.6887	40.5399	34.8337	25.9438	16.0242	16.842	17.5367	36.3405	18.9971	22.7501	28.4133
CG14273	0	0	0	0	0	0	0	0	0.0838917	0.142246	0.890565	0	0	1.14608
CG14274	0	0.283372	0.305958	0.454451	0.862646	1.14157	0	2.04135	2.85589	2.22751	10.9142	3.78167	1.43701	9.98802
CG14275	155.631	164.223	175.637	272.364	197.829	186.067	192.027	27.1513	35.3556	37.282	96.6	91.8923	93.1153	101.392
CG14282	0.497095	0.421995	0.650903	0	0	0	0.165806	0	0	0	0	0	1.37836	0.299386
CG14291	11.0785	13.315	13.0661	18.8669	16.4701	8.691	10.291	19.5678	16.9183	15.2483	77.2196	39.2129	42.5295	59.97
CG14292	0	0.10514	0	1.68616	0	3.17668	1.73504	0	0.130953	0.111021	0.397186	0	0	0
CG14298	13.8713	16.5496	26.6312	35.2179	17.0761	15.3854	24.0717	15.8721	14.9141	15.3415	35.8865	13.1658	27.9329	38.0332
CG14300	0	0	0	0	0	0	0	0	0	0	0.346482	1.16359	0	0
CG14305	0	0.116977	0.0631502	0	0	0	0	0	0	0	0	0	0	0
CG14309	0	1.31653	4.52107	2.22866	0	0.405141	0.402327	0	0.111507	0.245791	0	0.11358	0	0
CG14312	0.963287	0.654206	0.529761	2.36062	4.10755	0.658866	0.449825	1.19555	1.00357	0.340326	6.3921	2.04445	0	3.01624
CG14317	0	0.0394275	0.0425701	53.8096	0	0	0.10844	0	0	0	0.145723	0	0	0
CG14321	0.859793	2.48165	2.36422	6.55512	0	1.76423	5.62095	0.213208	0.536908	0.910375	1.35705	0.911482	2.62652	1.22249
CG14323	0	0	0	0	0	0	0	0	0	0	0	0	0	0
CG14326	0	0	0	0	0	0	0	0	0.156762	0	0	0	0	0
CG14327	0	0	0	2.7772	5.7989	0.930165	2.22266	0	0	0	1.56154	2.99664	0	0
CG14329	0.276505	0.586828	0.506881	2.82334	2.67965	1.89123	0.645596	0	0	0.119393	0.320354	0	0	0.384784
CG14330	0	0	0	0	0	0	0	0	0	0	0	0	0	0
CG14331	1.46716	2.15133	1.22252	0.363172	0	0.342104	0.155709	0	0	0	0	0	0	0
CG14342	0.147568	0	0.135258	2.00904	1.71612	2.52332	2.06728	0	0	0.130053	7.4444	1.17191	3.53778	0.838281
CG14346	0	0	0	0.275024	0	0	0	0	0	0	0	0	0	0
CG14352	3.81324	5.34834	7.21826	15.913	3.53479	11.9069	7.742	8.06907	6.02989	5.67231	6.88965	11.3585	9.00524	10.1561
CG14353	12.4842	12.1525	13.4263	23.4929	20.7559	16.129	16.3232	7.03412	5.6151	5.10398	14.3094	14.8883	20.5106	22.0642
CG14362	0	0.0857451	0	0	0	0	0	0	0	0	0	0	0	0
CG14367	30.7407	34.1875	28.7917	79.6824	51.7769	71.3871	56.2601	12.751	12.5105	11.0777	77.1544	148.138	125.461	84.3165
CG14369	0	0	0	0	0	0	0	0	0	0	0	0	0	0
CG14380	0	0	0.11352	0	0	0	0	0	0	0	0	0	0	0
CG14383	0	0	0	0	0	0	0	0	0	0	0	0	0	0
CG14391	0	0.261682	0.14127	0	0	0.263547	0	0	0	0	0.243054	0	0	0
CG14397	0.194458	0	0	0	0	1.33005	0	0	0	0	2.89504	0	0	0
CG1440	137.42	155.569	154.213	161.025	129.746	176.509	162.169	157.87	162.065	164.204	164.251	169.794	159.209	235.622
CG14400	4.48281	4.02097	6.12455	0.690914	0	0.867775	0.987421	1.35205	2.00795	1.70232	0.397186	0	0	0
CG14402	0.0753877	0	0	0	0	2.06254	0.528056	0	0	0.0662089	0	0	2.45597	0
CG14407	76.8159	103.759	96.4363	160.701	123.269	91.7441	79.1353	50.3992	60.289	63.9453	151.27	132.439	115.007	127.965
CG1441	162.714	163.584	173.856	634.601	503.836	499.135	414.678	31.882	40.2889	34.4389	781.662	696.965	877.138	976.401
CG14417	1.38713	0.909938	0.924673	0.429204	0	0.754702	0.883293	0	0	0	0	0	0	0
CG14427	0	0	0	9.77969	0	0	0	0	0	0	0	0	0	0
CG1444	746.462	786.221	816.029	174.818	95.9849	82.9063	90.2004	575.421	472.681	487.391	36.1316	24.2682	20.8247	32.0904
CG14441	28.3403	37.0181	38.9229	25.7141	152.962	188.205	263.961	28.44	32.0101	31.1543	23.6099	50.6203	64.8127	40.2027
CG14448	0.101498	0.172327	0.372125	0.138183	4.91814	6.42154	8.29434	0	0	0.0888171	0	0	0	0
CG14450	15.4375	12.8678	13.1244	30.0789	15.2859	21.2325	13.9736	17.3054	18.7989	19.1734	27.645	13.781	24.6032	30.8964
CG14455	0	0	0	0	0	0	0	0	0	0	0	0	0	0
CG14464	33.1836	29.5407	30.0868	79.3657	83.4387	85.8799	51.9315	189.247	132.779	178.317	257.194	1306.46	1244.65	294.33
CG14476	384.569	412.398	402.935	363.505	261.875	230.762	191.854	416.906	368.569	356.112	334.17	344.919	293.207	517.838
CG14478	44.4588	50.1962	54.3461	89.2978	62.6985	68.6559	62.4342	41.2643	48.7187	48.0691	45.6223	40.7507	38.5439	63.9311
CG14480	63.8417	54.3387	53.9207	82.4796	46.6452	75.4441	39.9965	41.1002	37.6914	36.2687	66.7081	51.8336	55.5142	75.6473
CG14482	301.519	176.326	156.251	789.69	870.251	587.986	303.419	196.913	153.786	181.099	884.604	300.788	152.767	575.795
CG14483	74.0931	59.022	55.3536	259.438	161.807	97.6247	95.9773	98.5016	78.6569	79.8852	223.914	90.2367	118.757	134.23
CG14490	1.16181	0.537976	0.290427	1.58173	1.02357	0.361205	1.72623	0.276593	0.696529	0.393675	0.3521	0.886848	0	1.11016
CG14491	0	0	0	0	0.971777	0	0.292657	0.304582	0	0.216755	0	0	0	0
CG14492	0	0	0	0	0	0	0	0	0	0	0	0	0	0
CG14500	0.328532	1.39449	0	2.08729	0	1.3108	0	0.134658	0.226067	0.191657	0.685668	0	0	0
CG14502	0.110676	0.18791	0.202887	1696.33	1385.76	948.705	1118.14	0.13609	0	0.0968482	3818.22	3541.99	3604.25	5072.67
CG14505	1.92334	0.445299	1.12184	2.14241	22.0283	19.7328	35.9256	2.44726	1.1205	0.791631	3.11532	37.569	58.3383	2.55129
CG14507	0.334697	0.331487	0.409038	1.36701	0.5406	1.3354	2.21415	0.137553	0.115464	0.0978893	0.437759	0	0	0.157741
CG14508	5.14126	5.8536	6.20929	3.45859	3.28257	1.75826	1.69469	1.19	0.749174	0.688073	0.47339	0	0.65445	2.13226
CG14512	17.6434	16.3207	13.718	24.8487	27.3575	11.8596	14.7733	19.5649	18.3181	15.8512	17.6257	14.7982	10.0647	20.1927
CG14515	84.3427	65.2918	105.12	0.843079	0	0	0.867519	0.306406	0.257202	0	1.36518	1.96486	0	0
CG14518	75.7885	74.6998	82.9978	32.6003	26.1348	15.3048	29.583	33.3905	34.3379	27.054	0.736029	0.617954	2.79823	6.13318
CG14523	3.84511	5.05424	4.8318	12.8761	6.01024	5.51445	4.99567	4.25781	4.4995	4.51805	38.183	25.0285	38.938	32.4351
CG14535	1.08542	1.03076	1.0792	2.50463	3.92234	4.30972	3.04974	1.20319	1.29582	1.11474	2.83211	5.24081	5.03399	6.63857
CG14537	0.204995	0	0	0	0	0	0	0	0	0.0901362	0	0	0	0
CG14543	23.3679	17.0295	22.4945	28.7633	17.3724	16.421	16.1937	7.91287	6.75287	5.72503	15.4453	0	3.01722	4.68833
CG14544	3.28186	2.84177	2.82762	5.45103	0	4.04049	2.14553	1.68427	2.8276	2.22599	3.36924	1.54295	1.55263	2.94318
CG14551	0	0.087878	0	0.140932	0	0	0.483394	0	0	0.0910375	0.651386	1.36722	0	0
CG14561	2.0378	0.728393	1.6712	29.2036	2.28667	6.41886	0.500837	1.5506	2.49472	1.28739	3.45431	0	1.81924	4.44544
CG14564	0	0	0	0	0	0	0	0	0	0	0	0.196722	0	0
CG14565	0.154699	0	0	0.105307	0.449762	0	0.180599	0	0	0.0687073	0.491612	0	2.20883	1.43931
CG14566	0	0	0.344664	3.2423	1.70061	2.78629	1.17063	0.60556	0.254158	0	0.385435	0.647205	0	2.43052
CG14567	182.116	211.126	225.143	69.9241	73.0162	50.7466	46.7913	230.398	143.847	148.505	46.1398	43.865	45.0261	56.8459
CG14568	0.486714	0.103296	0.223058	0	0	0	0	0	0.249725	0.84686	0.568068	0	0	0
CG14569	0	0	0	0.145269	0	0	0	0	0	0	0	0	0	0
CG14570	0	0.0774717	0	0.124243	0	0	0.639224	0	0	0	0	0	0	0
CG14572	0.485767	0.61857	1.9294	0.661341	0.470763	0.692194	0.189032	0.501665	0.168442	0.214205	0.510891	0.857865	0.706293	1.49576
CG14573	0	0	0.0993302	0	0	0	0	0	0	0	0	0	0	0
CG14579	0	0	0	0	0	0	0	0	0	0	0	0	0	0.223968
CG14589	1.85777	1.41939	1.53252	1.51754	0	3.65318	1.30128	1.11724	0.65648	0	0.853343	0	0	1.53745
CG14590	3.38631	3.28995	4.69026	11.4232	12.3976	11.1305	13.0018	8.978	10.8944	11.1893	108.011	77.2605	66.3113	94.6879
CG14598	0	0	0.166563	1.85551	0	0.621464	0.848579	0	0	0	2.56332	0	0	0.543331
CG14607	0.0518878	0.132146	0	0.070642	0	0	0	0.0642837	0.0539607	0.0457474	4.66444	5.22155	2.14949	1.76924
CG1461	145.525	195.92	265.934	1283.28	832.253	642.549	674.608	9.6199	18.8562	17.5156	455.97	857.85	675.032	263.648
CG14613	12.8641	13.3393	15.1147	23.2732	9.70567	10.4817	15.7234	36.3969	42.0541	36.1864	50.0122	74.5965	54.2575	78.8124
CG14618	13.567	16.3346	18.1746	22.4666	9.73452	17.176	11.4219	26.4616	28.2337	25.8081	40.9906	25.0444	24.4067	50.7278
CG14624	0	0	0	0.246326	0	0	0	0	0	0	0.151485	0	0	0.272929
CG14625	0.55045	0.724296	0.731575	6.70717	4.21425	8.56526	3.2773	0	0	0	0.462273	0	0	0
CG14626	10.0993	5.52628	21.9154	0	0	0	0	0.0741592	0.560252	0.369427	7.08028	5.38962	13.7036	2.21112
CG14627	0.308252	0.196261	1.6246	0	0	0	0.17993	0	0	0	0	0	0	0
CG14629	80.9451	67.4978	84.8945	131.336	62.7054	89.6719	61.526	18.0887	28.1791	38.2124	60.6784	25.4285	34.7017	32.5168
CG1463	8.35999	6.88666	8.28696	17.1988	6.72146	13.2362	10.1211	1.84396	1.74132	2.84321	4.69466	1.97077	0	2.73133
CG14636	3.63722	4.26831	5.04976	0.873857	0	2.74386	0.749323	29.0953	29.5229	31.0824	31.538	19.1915	12.8307	19.8953
CG14644	0	0	0	0	0	0	0	0.176448	0.0740566	0.125569	0.561539	0	0	0
CG14645	0	1.45679	0.196613	0	0	0	0	0	0	0	0.685668	0	0	0.617681
CG14646	33.4235	36.234	36.3243	43.911	32.1447	34.8828	30.0514	46.4552	48.6516	43.349	42.7321	36.1457	48.0131	66.249
CG14650	27.285	26.386	28.8037	45.4408	29.1863	38.4031	27.6962	37.7351	38.3025	37.4243	45.0382	48.9683	43.5661	68.4699
CG14651	0	0.0327405	0.0176751	0.0262534	0	0.461634	0.0450242	0	0	0	0	0	0	0
CG14657	19.5417	20.5677	20.6177	28.1999	11.808	18.19	12.9112	14.2202	14.4294	14.184	14.0309	13.9164	7.03534	15.1938
CG14659	0	0	0	0	0	0	0	0	0	0	0	0	0	0
CG14664	0	0	0.22704	0	0	0.847114	1.73504	0	0	0	1.56961	0	0	2.82794
CG14667	19.0782	16.5104	17.2039	28.5797	9.09491	21.2206	16.0014	17.8319	17.3763	15.9453	23.6867	23.367	15.8274	27.0282
CG14671	42.8222	44.7856	42.4492	44.2274	39.5482	36.7265	23.5069	38.8758	44.9051	49.1838	51.8147	17.0459	28.653	39.8184
CG14676	2.38769	1.37544	1.40691	0	0	0	0	0	0	0.0752374	0	0	0	0
CG14684	0	0	0	0.224821	0	0	0	0	0	0	0	0	0	0
CG14687	128.008	128.509	182.284	711.676	597.333	517.697	459.408	198.373	139.747	194.897	871.572	714.036	767.665	1303.15
CG14688	61.8431	61.8225	77.8748	146.26	108.804	105.501	90.7522	10.7009	10.8607	12.5999	70.2158	51.3617	60.4344	75.525
CG14695	8.85561	7.33432	7.58895	2.35246	3.20956	4.9244	2.3534	15.71	16.0507	13.3521	8.79942	6.90808	7.89933	6.17681
CG14701	30.9686	17.8689	19.2932	35.2447	35.1704	28.1321	24.8555	19.5649	13.1385	17.3506	35.2514	20.5887	18.5402	30.0302
CG14708	0	0	0	0	0	0	0	0	0	0	0	0	0	0
CG14710	13.5872	10.0022	12.3619	24.8462	17.2005	15.5175	11.5892	8.0957	6.69192	6.86079	9.8337	13.7383	7.06932	13.8904
CG14715	57.2946	55.4223	55.5558	87.8565	31.2694	51.3056	23.2344	8.77729	10.1895	9.03727	45.169	16.766	29.9079	43.6885
CG14720	0.217874	0.0924792	0.0998503	0	0	0	0	0	0	0	0.173241	0	0	0
CG14722	30.0406	28.0559	30.7134	55.0054	34.0932	25.2195	22.9248	17.0395	17.0255	17.1817	36.6978	24.6486	28.6283	42.6225
CG14731	0	0	0	0	0	0.11101	0	0	0	0	0	0	0	0
CG14749	16.074	15.4197	18.1136	36.4868	16.7987	25.6462	17.9398	8.83984	9.31624	8.70189	19.2342	18.3961	18.3669	24.4275
CG14752	0	0.47313	1.36224	0	0	0	0.43376	0	0.190618	0	14.4538	0	0	1.04165
CG14757	44.2946	46.1636	54.4061	258.944	168.242	161.742	146.339	64.3645	73.0735	67.333	310.33	177.825	203.042	304.839
CG14759	0	0	0	0	0	0	0	0	0	0	0	0	0	0
CG14760	0	0	0	0.0535491	0	0	0	0	0	0	0	0.102414	0	0
CG14767	224.161	237.839	230.639	231.914	189.583	179.224	158.343	278.644	278.545	268	344.207	417.97	419.13	522.399
CG14770	4.82282	3.50931	5.17833	8.44195	6.94401	11.3098	7.72149	0	0	0	42.2753	0	0	0
CG14780	0.275589	0.175466	0.189451	0.0937993	0.267078	0	0.482594	0	0	0	0.214979	0	0	0
CG14795	7.17486	9.5931	9.7001	7.32607	14.9494	6.13428	4.60683	1.41019	0.169105	0.286731	3.59031	6.88995	5.31806	4.85147
CG14803	7.89233	8.62337	10.2452	19.3563	7.46557	8.58799	7.05352	4.99218	5.66494	5.27967	7.94372	7.21281	6.01976	10.257
CG14805	49.3447	46.0788	43.0426	72.6101	49.7334	53.9307	38.212	12.2688	13.6896	13.9129	18.221	11.4068	10.3569	16.0139
CG14806	75.7804	59.3134	60.5733	133.268	76.7621	90.362	54.6537	44.1267	34.3863	37.1309	134.485	77.4247	127.49	126.92
CG14812	38.701	40.6261	34.3285	70.5354	27.8268	35.5787	36.4358	77.7886	67.4662	60.5074	104.945	48.6123	37.2944	94.5392
CG14814	2.35365	2.46819	7.26964	40.1216	3.64185	23.877	5.03359	0.940261	2.43011	1.16218	1.16544	1.37516	0	1.87276
CG14817	60.8507	63.3221	62.0723	101.551	96.2562	90.9608	71.0383	19.4932	24.5444	24.2766	63.5876	46.3554	42.0244	60.6357
CG14818	246.65	285.928	277.528	214.522	148.292	166.776	149.792	156.675	209.671	216.049	252.16	192.257	232.558	282.509
CG14820	0	0	0.0458447	0	0	1.11184	0	0.0613547	0.309012	0.043663	0	0.78689	0	0.140719
CG14823	8.38608	5.77592	7.32399	0.215418	0	0.405842	0	0.707883	1.86751	2.08702	1.54479	0.648485	0	0.115968
CG14826	0	0	0	0	0	0	0	0	0.0985152	0.0835203	0	0	0	0
CG14829	0	0	0	0	0	0	0	0	0	0	0.1494	0	0	0
CG14830	410.085	530.07	508.197	157.073	342.108	279.784	378.271	133.986	152.581	166.612	59.6268	37.0202	27.847	37.555
CG14837	4.59944	6.57735	5.69633	14.611	21.7032	25.5137	24.6102	3.57075	3.32732	3.21719	15.1795	19.8868	17.2379	23.3667
CG14839	0	0	0	0	0	0	0	0	0	0	0	0	0	0
CG14851	0	0	0.250939	0.372729	0	0	0	0	0.154506	0	0	0	0	0
CG14853	5.1183	5.33684	5.25229	11.6643	14.7728	16.9332	11.4308	2.48053	1.66575	1.86614	6.76647	6.0597	5.48796	10.2405
CG14854	68.4615	87.9379	87.4617	118.793	60.2763	57.0025	84.6251	98.8255	91.6876	90.9375	106.656	91.048	69.7659	120.261
CG14855	1.23495	1.8426	1.09764	0.866123	0	0.511925	0.786384	0.320958	0.307904	0.261039	0.81715	0.196017	0	0.262902
CG14857	0.445865	0.220794	0.442729	0.961108	0.576124	0.635335	0.347007	0.136656	0.650024	0.680753	1.27571	0.486845	0.721488	1.98501
CG1486	78.8078	94.1643	95.3349	58.3838	44.2102	58.4628	46.2433	92.6905	90.4461	95.1991	48.2397	68.1267	75.9528	78.5302
CG14860	2.13608	1.34323	1.45029	3.12356	1.38007	0.541122	2.03191	1.52178	1.51692	1.4214	1.69505	0.406608	0.502151	0.76349
CG14870	0.345344	1.0261	2.13663	2.23329	2.00807	3.98601	4.43479	3.50333	5.88149	5.74179	11.0816	8.16929	8.40738	8.88716
CG14879	14.2975	14.9005	14.49	23.2633	9.68791	29.6158	21.7123	14.1503	9.95828	8.5443	30.7497	33.6077	23.8966	42.7805
CG14905	0.263937	0.074687	0.08064	1.25767	0.511569	0.376097	0.616251	0.0542053	0	0.0385751	0.828032	0	0.476972	1.7405
CG14913	0	0	0	0	0	0	0	0	0	0	0	0	0	0
CG14915	0	0	0	97.4935	0	0	0	0	0	0	0	0	0	0.246553
CG1492	3.37411	4.65458	4.34905	11.0535	5.51795	5.34884	5.99057	0.649363	0.654103	0.801004	1.76348	0.832825	1.82848	1.7872
CG14921	0	0.0735981	0.238393	2.24259	0	1.03771	1.41695	0.2141	0.179718	0.228545	2.45291	1.60177	2.26073	0.245522
CG14931	0	0.642309	4.4211	13.7774	0	14.8784	0.662469	0	2.22502	0.820155	0	0	0	0
CG1494	0.147306	0.125051	0.236283	0.350959	0.404477	0.923579	0.716535	0	0	0	0	0	0	0
CG14945	3.02176	3.40811	3.52148	5.28936	6.10788	4.72415	5.64427	5.31008	4.99764	4.58049	11.6075	12.3824	13.5928	19.6829
CG14946	779.214	800.968	796.439	41.4222	26.1249	27.4113	17.7214	291.2	337.931	322.335	15.6168	15.1818	9.65862	11.1991
CG14958	0	0	0	0.195362	0	0	0	0	0	0	0	0	0	0
CG14968	3.86864	5.41447	4.02512	12.9538	11.1461	13.5879	9.03266	6.18062	6.75661	7.5694	21.9568	15.3621	30.3547	20.6038
CG14969	69.5551	69.5326	71.0789	71.3132	63.7578	53.3117	44.5712	23.9758	21.8816	20.4977	23.5564	18.7456	22.2299	23.804
CG14971	22.7147	25.6102	26.3909	27.2403	15.6499	14.6411	12.8445	41.4129	41.0872	40.8897	35.6054	26.6492	30.4308	45.6881
CG14985	21.1524	19.4225	23.6612	27.7398	13.7218	8.71016	11.4901	34.433	26.398	26.7801	29.4481	27.8001	18.3857	38.264
CG15012	131.961	125.155	115.181	191.396	159.457	117.971	112.504	176.738	151.747	146.618	223.699	175.581	160.85	233.174
CG15014	17.0181	18.6448	19.0714	25.9669	15.0611	14.495	10.9457	8.2532	11.0846	8.86346	13.6581	5.29248	5.14963	11.1853
CG15019	96.197	71.2591	80.2046	118.16	93.9162	82.1236	84.5178	18.7034	14.6631	16.8262	31.4462	16.5952	18.6315	20.4367
CG15024	0	0	0	0	0	0	0	0	0	0	0	0	0	0
CG15027	26.5867	20.313	20.025	30.0586	25.7656	22.9286	14.8442	30.7019	31.1407	28.0193	41.4353	24.9139	21.2623	30.9699
CG15034	0	0.849206	0.183379	0	3.10221	0	0	0	0	0.202305	0	0	0	0
CG15035	0.389436	0.283372	0.458938	0	0	0	0	0	0	0.0481679	0	0	0	0
CG15036	46.2378	34.3457	35.494	46.4255	34.7275	46.9442	22.2664	1254.79	827.784	695.9	340.54	296.767	219.172	497.052
CG1504	0.0979155	0	0	0.666529	1.51826	2.00915	1.48601	0.0613057	0	0.087256	0.234124	6.81426	1.40257	0.843637
CG15044	0	0	0.238393	0.177046	0	2.00131	0	3.30128	2.9097	2.58428	0.630372	0	0	1.32503
CG15073	7.28247	7.64405	7.29973	11.5752	9.10873	8.21993	5.947	7.7622	5.71489	5.06106	15.2358	10.9378	9.69208	16.8082
CG15080	0.148525	0.171936	0.173264	0.330886	0.314046	0.507938	0.567463	0.677637	0.249725	0.517525	15.4641	9.82139	6.25364	59.5516
CG15082	17.4329	20.7069	19.2647	1.24411	0	2.64437	0.164126	8.5867	10.1498	8.79196	1.22693	0	0	0.401916
CG15083	106.116	152.378	139.603	149.569	115.609	83.7287	104.287	331.745	389.601	353.518	240.444	136.539	181.011	257.757
CG15084	14.1567	12.4092	12.9154	21.1559	12.1241	15.5376	9.07052	5.73038	4.20042	5.68624	6.88373	4.14048	6.81785	6.47883
CG15087	13.9744	16.112	17.9632	19.791	9.64619	10.5775	10.4384	24.2969	19.8401	20.2635	30.398	34.0038	43.0046	47.3429
CG15093	58.6321	71.3629	77.9927	52.9829	32.2381	35.0297	31.1879	48.9519	58.8439	47.1252	93.7752	61.1229	53.2508	133.8
CG15096	62.2939	72.2728	80.4804	54.751	127.557	121.591	196.402	60.0756	55.2681	44.731	34.4696	33.0114	39.4093	49.2343
CG15097	2.19199	3.40674	3.09099	2.98426	1.76479	2.65255	3.22824	1.61982	1.18538	1.44832	4.91711	3.72879	3.36235	4.28667
CG15098	1273.7	1348.98	1324.95	1267.73	849.506	586.476	783.305	2179.67	2159.41	2115.98	2043.46	1684.47	1579.78	2099.85
CG15099	33.7524	41.0835	39.8305	39.7827	38.2184	38.8642	36.2442	47.9431	48.6114	48.3412	45.2708	49.6594	54.3914	83.3743
CG15100	16.5316	18.2512	20.2284	28.0226	11.8382	18.6249	14.9737	15.4153	11.0913	10.7061	16.1272	15.9201	15.2409	19.5788
CG15109	0.427907	0.18163	0	0	0	0	0	0	0.112737	0.0955771	0	0.430621	0	0.385037
CG15111	56.9535	63.133	64.2676	75.0575	41.1138	45.3608	45.5079	92.7297	94.3911	94.7676	116.852	107.377	91.3702	150.134
CG15115	0	0	0	0.219593	0	0	0.564897	0	0	0	0.117579	0	0	0
CG15116	0	0	0.0988158	0.146775	0	0	0	0	0	0	0	0	0	0
CG15117	11.7039	14.217	14.0128	12.8251	8.9756	16.1081	12.2193	23.7276	18.0401	17.5601	53.4618	65.5456	46.4938	69.6767
CG15120	12.4977	11.4125	12.1363	8.82933	3.14249	4.38959	5.04738	3.71263	4.67466	3.15902	6.67824	5.34813	4.8293	6.84905
CG15125	0	0	0	0	0	0	0	0	0	0	0.129243	0	0	0
CG15127	0	0	0	0	0	0	0	0	0	0	0.383168	0	0	0
CG15128	0	0.0304544	0	0.341883	0	0	0	0.175239	0.147099	0.0311771	0.167308	0.18729	0	0.200958
CG15130	1.4227	1.5097	1.63003	1.45269	0	2.12864	0	1.98504	2.96225	2.35441	1.68462	0	0	2.78223
CG15136	0.328532	0	0	0	0	0	0	0	0	0	0	0	0	0
CG15141	12.5666	13.6412	13.8315	47.8201	11.1802	12.1531	13.3478	11.9909	10.1192	10.4499	26.1207	20.0115	9.36635	22.7218
CG15142	0.101005	0.0857451	0.18516	0.825072	0	0	0	0	0	0	0	0	0	0
CG15147	0	0	0	0	0	0	0	0	0	0	0	0	0	0
CG15152	0	0.15771	0.17028	0	0	2.22367	0	0	0	0	2.64075	0	0	0
CG15153	0	0	0	0	0	0	0	0	0	0	0	0	0	0
CG15155	0	0	0	0.109796	0	0	0	1.13152	1.82047	1.34207	0.360102	1.41089	1.99133	0
CG1516	425.961	473.403	502.517	115.392	93.0897	124.6	74.353	194.817	222.395	209.858	79.653	72.9337	95.9254	95.9184
CG15161	6.60221	9.38373	8.38961	25.1951	12.4088	11.9736	17.8675	4.11294	3.96017	3.96001	16.7851	12.4117	16.4989	21.294
CG15167	0	0	0	0	0	0	0	0	0	0	0	0	0	0.50586
CG15168	91.8182	76.0017	80.485	135.66	68.4478	75.4009	77.9971	140.243	117.722	128.801	187.876	141.786	152.171	172.779
CG15172	0	0.307192	0	0.492651	0.701369	0	0.422444	0	0	0	0	0	0	0
CG1518	50.5147	56.2606	59.568	70.3618	71.8903	159.631	63.503	77.5814	85.3021	82.931	106.124	93.7085	95.1115	133.142
CG15198	0	0	0	0	0	0	0	0	0	0	0	0	0	0
CG15201	624.391	923.038	899.9	605.907	404.001	376.253	486.24	615.222	766.783	747.01	2069.66	1229.49	1107.73	2158.38
CG15202	251.494	252.972	262.688	552.755	527.079	503.672	438.919	53.6385	57.8354	59.5733	754.807	447.106	527.675	745.849
CG15203	30.7229	24.9773	21.1574	123.269	76.8767	147.04	72.4921	56.319	42.0072	44.6598	97.7078	90.4603	54.9377	105.365
CG15208	0	0	0	0	0	0.194952	0	0	0.0557827	0.331045	0	0	0	0
CG15209	6.79415	4.8064	5.9679	95.7734	68.3119	55.9096	42.9629	43.223	40.8376	44.691	507.291	448.698	509.955	544.121
CG15210	7.53877	7.42382	11.3323	11.0847	0	7.21889	7.04074	14.129	12.8217	8.96785	73.4024	38.3639	63.1711	46.8561
CG15211	30.7991	42.612	56.891	54.7344	35.5439	34.5737	43.9151	188.688	172.299	163.867	78.6473	142.315	117.426	119.026
CG15213	2.01358	2.84895	3.07603	1.82758	3.90278	0	3.91783	9.24756	16.5601	13.162	4.70881	0	0	1.76746
CG15219	0.355676	0.15097	0.163003	0.242115	0	0	0	0	0	0.156961	0	0	0	0
CG15221	0	0.0324101	0.174967	0	0	0	0	0	0	0.0346809	0	0	0	0.0558855
CG15227	0	0	0	0	0	0	0	0	0	0	0	0	0	0
CG15247	4.86474	5.5727	8.05834	82.7481	119.396	118.563	157.238	4.78824	7.85866	9.20545	79.5126	59.2717	54.8364	64.9083
CG15249	0	0	0	0.151484	0	2.85392	0.519584	0	0	0.100594	3.77875	0	1.74134	2.75568
CG15255	0	0.0676764	0.146141	1.62802	0.927098	14.7223	0	0.0980265	0.16457	0.279042	0.249573	0	0	0
CG15258	0	0	0	0	0	0	0	0	0	0	0	0	0	0
CG15262	0	0	0.043542	0	0	0	0	0	0	0	0	0	0	0
CG15263	0	0	0	0	0	0	0	0	0	0	0	0	0	0
CG15269	0.425356	0.541643	0.552324	0.048258	0.343516	0.181834	0.165524	0	0	0.030245	0.108204	0	0	0
CG15270	9.85921	10.9176	10.8328	18.0593	14.6184	31.3242	20.3692	5.70474	4.7705	4.84404	16.6697	29.4231	37.9528	24.6068
CG15279	118.46	141.253	141.23	40.5185	25.5605	36.3582	24.5566	4.2243	3.11106	4.42424	20.1402	12.9481	11.5722	13.6188
CG15283	0	0	0	0	0	0	0	0	0	0	0	0	0	0
CG15296	0.738709	0.313554	0.112849	0.167618	6.20442	0.842102	2.58716	0	0	0.107737	0.192718	0	0	0
CG15309	27.5601	36.7215	42.3251	49.9458	520.029	598.285	835.253	16.7547	22.4266	26.9083	31.1281	221.659	292.072	39.7256
CG15317	5.92946	7.8708	8.79457	10.5677	2.08958	6.82081	5.53773	11.8597	11.633	11.19	13.9098	13.1025	18.7609	17.7262
CG1532	299.101	299.606	283.422	270.488	188.201	138.239	170.54	261.551	272.447	257.028	265.481	229.428	246.916	306.137
CG15322	1.6027	2.55405	2.44836	0.612486	1.14446	1.29815	0.590851	0.0693358	0.0291007	0.148028	1.01503	1.63029	0	0.67585
CG15330	0	0	0	0	0	0.589703	0	0	0	0	0	0	0	0
CG15337	1.84951	1.78816	2.02486	0.559555	2.1907	0.439245	0.959626	0	0	0.131304	0.0782915	0	0	0.141057
CG15347	12.8342	14.4445	13.3678	1.19134	2.63833	9.97536	0.227014	32.9267	34.2688	36.8899	54.5181	33.5267	30.5395	41.4584
CG15356	10.2103	10.8088	12.6584	20.7679	8.594	14.5376	11.1599	7.81693	9.23809	7.52084	14.9262	15.8845	16.8339	20.1693
CG15357	0	0	0	0	0	0	0	0	0	0	0	0	0	0
CG15358	0	0	0	0	0	0	0	0	0	0	0	0	0	0
CG15369	1.36439	2.17174	1.71955	0.464385	1.65282	0.291629	0.398206	11.5545	12.8165	19.529	24.4269	20.2878	18.882	1.8929
CG15370	0.22494	0.0954784	0.0515443	0.0765607	0.326989	0	0	0.140191	0.0588393	0	1.60616	0	2.09711	0.160766
CG15373	0.187789	0.079709	0	0.0766989	0	0.321108	0.0876915	0	0	0	0.0588424	0.247014	0	0
CG15387	3.94616	4.72043	6.24751	12.4543	2.43362	4.90742	5.86324	3.78212	5.41577	5.06642	9.34596	7.13334	9.78831	7.14361
CG15390	5.22067	5.90924	4.50779	11.64	3.95955	10.6089	3.88649	4.5754	5.25151	3.25608	10.8168	8.18337	6.57317	11.4575
CG15394	352.018	368.49	395.462	94.2463	90.0421	65.7872	65.0804	28.9015	28.6351	30.0086	94.6921	41.523	18.6219	21.371
CG15395	0	0	0	0	0	0	0	0.0900878	0	0.0641108	0	0	0	0
CG15398	0	0	0	0	0	0	0	0	0	0	0	0	0	0
CG15399	0.859793	0.802887	1.18211	0.351167	0	0	0.401497	0.106162	0	0	2.16227	3.6308	0	0.730453
CG15403	0	0	0	0	0	0	0	0	0	0	0	0	0	0
CG15404	0	0	0	0	0	0	0	0	0	0	0	0	0	0
CG15414	0	0.441588	0.178794	0.708186	0.378082	1.00065	0.455448	0.322838	0.270995	0.287184	29.7952	34.8491	33.8052	13.513
CG1542	23.7891	22.2089	22.426	52.4104	24.6964	22.2512	12.1848	12.9596	11.0189	9.52024	21.2871	15.7275	12.9487	20.5187
CG15422	1.00033	0.679366	0.733515	0	0	0.684208	0	0	0	0	0.651386	0	0	0
CG15423	7.3894	2.80635	1.60414	0.529485	0	0	0	0	0	0	0.620367	0	0	0
CG15425	0	0	0	0	0	0	0	0.127288	0	0	0	0	0	0
CG15429	0	0.0821561	0	0	0	0	0	0	0	0	0	0	0	0
CG15432	36.5004	27.6928	32.4861	58.0953	305.2	326.843	411.704	26.6973	22.9704	21.5323	38.2334	31.3866	22.7089	33.1668
CG15434	0	0.185932	0	0	0	0	0	0	0	0.193696	10.048	0	0	3.12126
CG15435	6.49441	4.24908	5.53564	11.1508	5.93305	8.70018	5.69837	4.6195	4.38901	4.55186	7.36685	9.9829	6.1643	8.67389
CG15439	6.68798	6.71142	7.34098	13.9389	7.60165	8.64762	5.78346	9.575	10.0252	10.1295	13.008	10.8387	12.0946	17.0018
CG15440	24.151	30.4381	30.8207	39.709	20.1644	20.6484	27.9052	28.3262	28.0599	21.242	27.238	16.4392	15.2767	32.2214
CG15445	39.1562	44.3303	43.5433	39.6951	27.4732	22.5678	24.5264	41.3518	37.4352	37.7768	25.5259	37.6152	32.2138	31.6775
CG15450	0	0	0	0	0	0	0	0	0	0	0	0	0	0
CG15452	0	0	0	0	0	0	0	0	0	0	0	0	0	0
CG15458	0	0.280374	0	0	0	0	0	0	0	0	0	0	0	0
CG15461	0	0	0	2.44202	0.695323	0	0	0.38765	0.325399	0	0	4.14309	0	0
CG15471	0	0	0	0	0	0	0	0	0	0	0	0	0	0
CG15475	0	0.151618	0.0818518	0.243154	1.73085	0.305397	1.04251	0	0	0	0	0	0	0
CG15479	1.71708	1.28618	1.8516	11.276	4.50272	7.77206	6.13159	0.125416	0	0.0892524	0	0	0	0
CG15480	0	0.319221	0	9.04434	0	0	0	0	0	0	0.198593	0	0	0
CG15483	0	0	0	0	0	0	0	0	0	0	0	0	0	0
CG15485	0.0311017	0	0	0.042343	0	0	0	0	0	0	0	0	0	0
CG15497	11.1237	12.2965	12.1764	32.4676	19.3888	25.7262	27.8408	0	0	0	0.503001	0	0	0
CG1550	25.6265	28.1036	28.9118	34.5269	22.999	16.539	17.2285	21.5322	20.8922	20.4797	30.9538	18.9005	24.1341	26.9457
CG15506	0.770631	0.713677	0.70635	9.34713	9.64087	12.5783	8.17863	31.9812	23.5357	21.7617	49.7462	32.9631	30.223	32.6557
CG15515	1.52246	1.14885	2.01568	17.2728	11.4756	12.4381	11.0591	0	0	0	0	0	0	0.422156
CG1552	0	0	0.103649	0.769768	0	0.966815	0	0.150499	0.126331	0.107102	0	0	0	0.172587
CG15522	2.40543	3.67565	3.19694	3.27485	1.16557	2.46789	2.52733	3.88086	2.53372	2.14807	4.02541	0.921723	0	5.60424
CG15525	16.413	15.7985	23.3358	33.2539	19.7886	25.4134	19.9152	12.3128	14.4965	13.3142	28.9052	18.4575	18.5733	35.3912
CG15536	17.3761	12.8718	14.1007	25.9167	18.0192	21.5744	22.74	5.3075	4.91214	4.06762	5.5437	6.10886	0	4.83795
CG15537	0.0589434	0.100076	0.0540266	0.0802478	0	0	0	0.214399	0.0599898	0.254294	1.27366	1.68039	0	6.06466
CG15543	0	0	0	0	0	0	0	0	0	0	0	0	0	0
CG15545	4.82397	2.76301	3.46268	10.0492	6.9843	24.3486	7.73498	0	0	0.0533943	1.05062	0	1.32042	0
CG15548	0	0	0	0	0	0	0	0	0	0.0219897	0	0	0	0
CG15549	0	0	0	0	0	0	0	0	0	0	0	0	0	0
CG15550	0	0.123521	0	3.1695	0	1.49281	2.03837	0.184064	0	0.392966	1.87449	0	0	0.633234
CG15554	7.92647	6.12815	6.48689	1.73434	1.37173	0	0.330483	0	0	0	0	0	0	0
CG15556	62.9997	68.5952	74.9724	27.3519	23.6631	17.6716	16.4082	76.9934	81.2952	77.1028	49.6789	60.2307	60.6953	73.8191
CG15561	7.92647	7.47114	7.47899	17.8534	125.505	202.411	176.498	11.1981	9.39981	9.28842	18.2199	307.527	290.908	29.2548
CG15571	0	0.116207	0.12547	0.372729	0	15.9168	0.319612	0	0	0.105857	0	0	0	0
CG15576	0	0	0	0	0	0	0	0	0	0	0	0	0	0
CG15577	0	0	0	0	2.0368	0	0	0	0	0.183914	0	0	0	0
CG15579	0.885405	0.18791	0.811549	0.301356	1.71612	2.64948	3.61774	0	0	0	0	0	0	0
CG15594	0.128836	0.437486	0.413312	0	0	0	0	0	0	0	0.379817	0	0	0
CG15602	40.7014	32.8996	33.6259	40.669	34.1969	40.9885	27.5577	19.2984	16.322	15.0342	23.4499	12.3441	20.5834	19.7834
CG15605	0	0	0	0	0	0	0	0	0	0	0	0	0	0
CG15614	0	0.0376621	0.0813277	0.120799	0	0	0.103584	0.377836	0.36247	0.0768247	0.137423	0	0	0.371391
CG15615	0	0.194639	0.0525383	0	0	0	0	0.141353	0.177981	0.100594	14.8451	1.66181	0.497527	0.891541
CG15617	0	0.0795653	0	0	0	1.12185	0	0	0.194356	0.411934	0.147373	0	0	0
CG15618	4.56419	6.25204	6.19327	4.39676	3.16439	2.97508	4.50752	2.09927	2.21494	1.95043	2.46822	2.33713	2.02681	3.14296
CG15625	0.119238	0.354283	0.437167	0.487005	0	0.917505	0.835205	0.0733092	0	0.0521704	0.279965	0.783509	2.32227	0.420342
CG15628	24.2939	29.601	29.655	686.63	3919.42	4419.29	5327.78	18.3253	18.3407	19.2608	404.648	1103.72	1020.84	828.466
CG15629	5.24977	5.10884	5.92682	18.3039	10.1753	11.7137	13.4532	0.710692	1.12684	0.56196	15.4804	4.89499	10.1448	13.4927
CG15638	0.388916	0.165079	0	0	0	0	0	0	0	0	0.280769	3.30018	0	0
CG15641	0	0	0	0	0	0	0	0	0	0	0	0	0	0
CG15642	2.61509	4.05392	5.31498	4.64385	3.30563	2.13861	5.30941	3.32459	4.1254	4.01181	5.52022	2.7808	14.7544	10.6087
CG15643	3.82771	7.16539	6.47711	7.21549	15.2184	8.55905	10.9995	5.56709	8.15304	6.74351	6.48369	12.1531	2.08455	7.47079
CG15649	0	0	0	0	0	0	0.408244	0.216821	0.182003	0.462902	1.93207	0	0	0
CG15651	3.09195	3.9218	3.50087	5.15045	4.58281	1.92822	2.29317	2.15074	2.06865	2.55096	7.64322	4.2142	6.93924	6.88536
CG15653	9.05717	7.481	7.17981	13.3306	12.3359	11.9294	13.717	2.35263	1.60455	1.67425	4.49231	5.02886	0	5.39584
CG15657	0	0	0	0	0	2.204	0	0	0	0	0	0	0	2.98371
CG15673	204.194	229.02	253.912	431.994	243.949	290.211	268.149	277.887	199.879	225.79	80.2945	109.919	64.1958	157.012
CG15696	1.74361	1.77622	1.38508	0.316508	0	0.397528	0.542805	0	0	0	0	0	0	0
CG15704	0	0	0	0	0	0	0	0	0	0	0	0	0	0
CG15706	16.2132	19.9247	19.9913	36.3159	24.2421	30.034	37.2244	3.69613	4.02933	4.33836	11.1212	8.72149	8.27874	9.63312
CG1571	0.127846	0.135664	0.117182	0.522165	0.991182	2.02214	0.671627	0.0787227	0	0.0280115	0	0	0.277084	0
CG15710	0	0	0	0	0	0	0	0	0	0	0.130277	0	0	0
CG15711	0	0	0	0	0	0	0	0	0	0	0	0	0	0
CG15712	0	0	0	0	0	0	0	0	0	0	0.305815	0	0	0
CG15715	151.053	114.698	118.144	264.145	132.509	134.922	109.781	118.162	113.599	127.452	171.418	143.918	126.192	137.434
CG15717	31.3757	33.785	34.3588	31.1377	14.8832	19.2012	15.4226	13.7997	12.091	7.74174	10.1299	4.52153	3.3681	11.0891
CG15719	0	0	0	0	1.76438	0.667102	0	0	0	0	0	0	0	0
CG1572	229.007	265.174	291.077	211.217	168.624	183.231	198.575	261.159	189.505	209.099	261.988	186.767	220.317	241.546
CG15728	0	0	0	0.0950587	0	0	0	0	0	0	0	0	0	0
CG15734	5.25036	2.80635	4.45594	6.08908	0	11.6379	2.27014	0	0	0	0	0	0	0
CG15735	61.0787	73.34	75.231	131.586	70.4358	86.2417	72.5359	94.1665	92.7655	89.4359	163.6	138.241	135.704	168.976
CG15739	2.76976	4.53058	4.95361	1.37959	0	0.924124	0.157731	1.15919	1.11204	0.707087	2.31885	1.41589	1.16573	0.854559
CG15743	20.1037	26.6197	29.2786	31.9981	17.0403	28.3628	14.6427	48.4234	57.9982	57.554	56.4901	40.785	49.6052	66.7192
CG15747	18.6027	14.8337	18.2829	33.0853	18.028	31.7176	16.4448	18.2375	17.7318	15.8732	26.2224	21.1744	21.705	36.7877
CG15754	0	0	0	0	0	0	0	0	0	0	0	0	0	0
CG15756	0	0	0	0	0	0	0	0	0	0	0	0.571661	0	0
CG15766	5.29808	4.98831	3.97321	3.54094	3.73414	2.47074	1.57439	9.40099	14.0845	10.7551	4.84752	0	0	0
CG15771	71.8572	84.5857	83.9144	92.0844	215.844	291.846	349.921	50.4261	64.9908	63.9907	150.064	1012.86	1109.82	152.925
CG15772	3.93646	5.45591	4.34445	5.90611	4.67128	4.12109	4.68929	5.01858	5.45169	5.95242	14.5309	8.83437	15.7592	19.0709
CG15773	0.348234	0.258671	0.279288	0	0	0.446596	0.101634	0.165064	0.3233	0.195779	0.210124	0	0	0.630965
CG15800	0	0	0.242948	0	0.770613	0	1.54717	0	0	0	0	0.632241	0	0.508784
CG15814	62.5509	67.3526	67.7302	83.7469	55.2793	54.8645	52.8187	58.0458	66.9121	59.9142	61.9834	56.7397	55.4385	77.3839
CG1582	32.1152	37.2744	38.9128	43.7668	37.8238	33.1756	33.2298	28.6638	30.9473	29.6578	35.5783	35.2845	37.7549	44.2604
CG15824	0.361491	0.252723	0.350828	0.014475	0.144252	0.0181803	0	0.0388435	0.054343	0.0460715	0	0	0	0
CG15829	4.31365	5.38522	4.65156	5.52731	5.40994	9.11164	2.96226	2.21104	2.12112	3.59653	7.6397	6.07654	3.89115	11.2288
CG15863	12.9256	8.83178	13.8701	20.8164	18.6367	15.094	11.0412	7.81217	10.4923	9.31219	27.3482	20.0386	21.9975	24.1886
CG15864	2.46287	2.91989	2.80233	3.00618	1.97528	4.13876	3.47007	0.152291	0	0.18063	0.193865	0	0.804039	0
CG15865	0	0	0.0175935	0	0	0	0	0	0	0	0	0	0	0
CG15873	0	0	0	0	0	0	0	0	0	0.122609	0	0	0	0
CG15876	0	0	0	16.4217	0	0	0	0	0	0	0	0	0	0
CG15877	18.7789	16.0056	17.0059	26.3844	7.13396	16.4407	14.5568	9.52434	10.2679	12.3598	22.8223	11.5765	15.4469	25.592
CG15878	0.0466525	0.118813	0	0.508116	0	0.478638	0	0	0	0	0.642815	0	0	0
CG15890	310.09	366.688	389.579	98.8864	132.229	141.483	150.933	212.099	177.502	152.457	67.0384	445.167	560.876	80.978
CG15891	76.246	77.2926	72.0619	94.2982	67.1243	53.2487	54.124	60.7236	87.2646	85.7364	88.2256	59.5347	76.6586	109.189
CG15892	2.80229	2.4384	2.3759	2.95674	1.62944	4.67196	2.78074	1.2101	1.4511	1.90686	1.87053	2.7714	0.912693	2.57715
CG15896	5.54598	5.32502	6.90639	8.48783	6.3755	4.31655	3.21492	6.40846	7.72001	7.31082	12.3302	11.9207	4.13242	10.2662
CG15905	0	0	0	0	0	0.533016	0.545855	0	0	0	0	0	0	0.10907
CG15912	6.68192	6.31865	6.35713	12.7819	12.6232	26.3225	18.761	5.01255	4.03229	4.38465	13.4265	9.37524	2.94048	10.5384
CG15914	6.45733	6.18458	7.99277	8.34044	4.49286	2.64246	6.18539	4.04694	4.77892	4.24678	5.23902	6.30462	0.724282	5.03418
CG15923	4.92686	6.65975	6.12455	7.02429	5.0001	7.4484	6.17138	2.46826	2.40606	2.03984	4.72997	6.18371	2.24197	3.74357
CG15925	0	0	0	0	0	0	0	0	0	0	0	0	0	0
CG15927	0.11009	0.0934579	0.100907	0.299762	1.92041	1.12948	1.02817	0.538629	0.452133	0.383315	2.9141	0	0	0
CG1597	28.9436	34.9109	33.4479	37.403	17.813	23.3001	19.1692	29.5539	30.9331	28.0716	33.9684	31.4558	23.0503	41.664
CG1602	6.20243	6.3062	5.5198	9.03337	5.52162	3.82302	4.63077	5.67088	5.23993	5.31833	9.56931	7.04753	5.02869	8.62047
CG1603	14.9484	11.846	12.1393	23.2517	15.2093	9.77505	8.37318	10.3006	10.1058	9.89757	16.4875	14.1213	17.21	26.7149
CG1607	13.8301	15.5958	16.3848	62.0507	46.49	48.4973	46.5568	166.721	193.287	186.477	104.982	98.5073	108.783	131.609
CG1620	53.4378	58.3861	62.5843	77.2962	49.3442	62.8396	43.3582	27.9029	30.0302	28.7273	39.6955	31.785	34.1737	51.5077
CG1636	39.6531	44.9911	44.3335	197.476	90.7924	116.237	136.841	28.5089	27.1662	25.6323	94.0702	62.0754	75.6674	77.9601
CG1640	198.227	220.195	222.588	344.56	262.032	293.479	235.808	134.589	162.312	156.196	319.885	284.918	308.65	419.067
CG1648	931.521	1304.64	1231.85	936.157	826.738	725.033	788.914	428.962	503.16	524.075	922.231	796.895	815.345	1264.92
CG1662	43.7372	53.3509	57.5255	67.061	37.5304	22.6543	30.1401	41.6939	51.172	50.5763	73.0462	42.3108	42.6174	49.1412
CG1665	36.4122	44.4186	39.433	26.4945	15.7756	16.2198	10.5735	48.9811	46.247	47.1031	70.0383	66.143	55.1206	66.5556
CG1667	26.2666	28.4264	32.9163	48.8091	16.8134	29.4588	21.2454	6.01571	6.93572	5.67373	18.0838	13.1687	16.1992	30.4203
CG16704	10.5352	7.15484	10.1392	9.68153	5.61539	6.3051	7.37941	56.7881	51.8044	54.9916	9.57272	0	0	2.67627
CG1671	16.3125	18.1797	18.0294	18.2851	8.30147	12.6583	11.2348	10.6441	12.7328	11.397	17.0305	13.3591	11.3998	23.5167
CG16712	4184.75	3932.29	3694.97	706.804	713.621	459.921	478.109	898.944	863.239	1061.43	1784.41	831.457	869.998	1036.47
CG16713	199.443	196.022	193.97	272.566	306.4	226.489	207.951	758.882	545.828	668.245	1152.4	815.702	1019.63	1054.1
CG16716	0	0	0.021997	0	0	0.12311	0.0560336	0	0	0.0210006	0	0.189234	0	0
CG16717	23.3038	27.9673	32.485	50.4229	30.1121	28.3445	31.0919	6.54497	5.06585	5.26262	14.0665	19.4409	5.08602	17.058
CG16719	0	0	0	0	0	0	0	0	0	0	0	0	0	0
CG16721	86.2609	86.6014	87.2883	89.3981	64.9831	60.7144	58.317	62.2013	74.1675	81.1962	125.398	120.559	100.17	137.553
CG1673	21.0419	18.5009	21.8267	7.41758	7.82905	15.7414	4.71555	12.2738	12.8181	10.539	3.37429	9.60751	6.69308	3.30403
CG16734	4.97865	6.65869	6.75894	10.6787	2.64003	5.14005	4.05757	14.3652	14.4297	13.3883	12.5482	14.775	16.5013	14.4057
CG16736	0.225347	0.382604	0.20655	0.306796	0	0.38533	0.175383	0.882242	0.740566	0.627846	1.79692	4.52598	1.70789	0.50586
CG16739	0.247702	0.42056	0.454081	2.02339	1.68036	5.29446	4.91595	0	0.126331	0.107102	0.766336	0	0	0.517762
CG16741	0	0	0	0	0	0	0.558404	0	0	0	0	0	0	0
CG16743	29.3682	21.0674	27.6138	72.1465	47.2602	60.2245	41.2433	3.73113	4.80981	4.83636	65.817	34.7503	29.3139	67.8484
CG16749	0.549619	0.399929	0.647711	1.17586	1.21747	2.41667	0.549974	0.632097	0.0757988	0.385569	1.49435	0.386039	0	0.724866
CG16753	9.63943	10.4784	10.1283	26.567	1.36707	15.2767	11.5277	3.01844	5.06745	3.17096	6.03813	1.22896	3.54138	7.08771
CG16762	22.855	31.0155	25.3785	0	0	0	0	0.832029	0.349208	1.11021	0	0	0	0
CG16771	7.15676	7.32028	7.87176	20.0574	13.6008	11.581	13.857	9.80603	9.50347	9.00859	21.5048	20.1987	15.3748	33.889
CG16782	1.45649	3.09112	3.05142	0.283274	0	0	0	0	0	0.0914947	0	0	0	0
CG16787	14.7212	18.0824	17.7899	47.4737	43.198	34.4537	24.5786	10.6604	11.42	9.82624	27.0118	16.9276	21.441	28.5248
CG16790	28.6298	35.2586	33.4858	15.5911	7.65933	14.2039	8.28514	1.89149	2.59053	1.91285	3.67513	8.51189	7.88397	5.13733
CG16798	212.224	267.346	234.466	1.56533	0.0718872	2.09287	1.21236	14.0954	15.4113	13.5713	3.31724	2.91167	1.56341	2.24124
CG16800	0	0	0	0	0	0	0	0	0	0	0	0	0	0
CG16812	25.7916	25.7771	26.8676	54.7249	33.5039	29.1668	24.6643	17.2249	18.1325	17.4488	45.9969	26.6249	33.8684	57.0712
CG16826	0.793228	1.70938	0.111856	0.581502	0	0	0.142467	0	0.239959	0.0508588	0	1.37486	0	0
CG16833	16.0278	15.2226	19.2495	25.6296	13.9324	29.3666	18.9153	11.3578	12.5847	11.6562	19.7242	32.8645	32.907	39.8419
CG16836	161.254	92.9661	65.4954	13.0456	3.18385	0	2.55691	36.9997	13.877	14.0057	38.081	4.20683	1.38542	20.7635
CG16837	0	0	0	0	0	0	0	0	0	0	0	0	0	0
CG16854	0	0	0	0	0	0	0	0	0	0	0.0462632	0	0	0
CG16865	13.9837	11.585	12.8944	23.2813	12.8987	19.1578	8.06406	5.66223	6.95337	4.99959	17.6194	11.4309	31.0016	22.3656
CG16879	0	0.0283523	0.214286	0	0	0.114218	0	0	0	0	0.303912	0	0	0
CG1688	1.65459	2.3282	2.45145	3.02406	4.26131	5.96856	3.70444	0.684821	1.24167	1.18914	2.65018	5.73823	5.83315	4.0837
CG16890	15.0004	16.705	15.5972	26.461	15.006	24.5466	11.6745	11.6025	9.48956	8.25688	17.6733	12.5064	7.15533	12.9641
CG16892	6.78685	7.92204	9.94498	29.1177	5.88488	13.4375	6.15082	6.57428	8.82967	6.86194	12.9719	12.062	7.03835	15.7066
CG16894	0	0	0	0	0	0	0	0	0	0	0	0	0	0
CG16896	9.96127	10.7626	12.4698	18.1491	7.18406	10.9833	6.73644	3.18839	3.41619	2.95156	5.18072	8.53302	5.10936	9.00704
CG16898	0.204491	0.347195	0.374868	0.0696007	0	0	0.119364	0.063017	0.0528974	0	0.0802198	0	0	0
CG1690	0	0	0	0	0	0	0	0	0	0	0	0	0	0
CG16926	73.7255	61.0573	88.9	2.89966	4.12813	2.52133	2.29517	7.71607	15.8516	23.5541	20.9374	0.434038	1.4294	6.75282
CG16935	92.262	91.2863	89.9081	107.279	75.0091	65.9752	60.9646	96.9496	100.806	88.48	146.562	117.827	126.225	179.088
CG16940	32.7052	34.6672	36.7545	53.7516	31.7531	38.5437	28.8043	25.425	23.3939	23.4096	33.5579	31.3973	33.9304	51.109
CG16947	8.50543	8.81138	8.3685	18.4488	12.6668	17.4196	11.444	6.98847	5.46851	5.60551	21.4866	19.2424	15.9468	29.1361
CG16952	25.4105	27.907	30.5403	38.9847	27.0824	34.053	23.3909	27.5357	33.0857	31.2713	43.9669	58.4845	51.6723	61.3757
CG16953	217.366	242.234	247.362	222.565	174.757	150.636	145.828	212.502	226.328	226.122	364.775	385.03	400.127	539.74
CG16956	0	0.0887613	0.191672	0	0	10.1909	0	0	0.201656	0	0	0	0	0
CG16957	0	0	0	0	0	0	0	0	0	0	0	0	0	0.764059
CG16959	53.4032	49.3033	69.3471	4.73063	4.7304	8.13431	5.31205	23.0264	20.875	23.6697	4.95053	7.76582	2.34136	5.69193
CG16972	8.69999	9.59617	9.39074	14.7435	10.0704	13.9402	10.256	10.7773	10.8311	9.83394	14.02	19.1869	14.9135	24.9211
CG16974	60.5174	63.7964	69.6555	95.3035	65.3858	77.8091	59.248	80.1097	82.2945	84.7827	153.257	148.008	127.218	243.806
CG16979	33.2501	39.8375	38.1742	35.561	23.9847	20.5735	20.8091	36.3752	35.9826	35.0351	36.2716	31.9845	33.3802	45.0007
CG1698	20.8388	32.6262	24.9911	14.8568	18.9928	18.0614	18.9421	5.42353	4.25568	5.2301	9.75577	8.14873	13.2105	10.2306
CG16985	55.1595	55.3614	40.0628	65.9706	27.6076	27.6989	31.9526	44.7736	41.7918	41.7049	53.2551	53.9499	60.5419	80.6846
CG16986	41.032	40.3914	40.5434	70.9177	36.3804	36.8228	32.6138	47.7465	46.4312	44.2364	70.1845	57.3848	44.7091	69.4238
CG16989	41.9682	48.7062	47.151	46.3184	34.4511	22.8234	25.0141	57.566	65.916	63.7612	96.8936	62.6293	61.2616	76.7067
CG16995	0	0	0	0	0	0	0	0	0	0	0	0	0	0
CG17003	0	0	0	0	0	0	0.169272	0	0	0.0596968	0	0	0	0
CG17005	0.102666	0.0581036	0.188204	0	0	0	0.0799032	0.505797	0.63686	0.509929	0	0	0	0
CG17010	0.0485012	0.164695	0.0444555	0.0660314	0.470031	0	0	0	0	0.0837126	0	0	0	0
CG1703	60.92	54.0885	59.6275	71.6518	83.343	91.257	100.343	37.9314	35.7003	33.9952	91.4636	285.24	284.332	126.692
CG17036	1.78208	3.10747	2.82539	13.1146	4.85439	7.41224	6.74737	1.53983	2.48568	2.27593	11.535	9.6212	11.8819	21.7333
CG17047	0.955422	0.585779	1.11898	0	0	0	0	0.264444	0.110989	0.141143	2.44059	0	0	0
CG17048	0	0	0	0	0	0	0	0	0	0	0	0	0	0
CG17059	105.5	71.1515	67.6901	163.182	106.786	95.2109	90.3197	91.375	56.1453	54.1021	202.86	103.909	92.6253	177.716
CG17065	28.1918	39.9018	41.7101	49.7938	48.1624	45.0494	37.164	17.5087	18.837	16.0138	38.3768	28.2011	36.7804	40.7223
CG1707	144.94	146.929	159.398	167.873	84.782	113.609	74.5279	73.5687	82.9066	78.3263	119.461	70.2701	71.3623	80.2141
CG17075	4.38495	4.89031	4.62994	9.83263	13.6234	16.797	12.0449	3.42726	3.72435	3.4978	6.62884	22.3185	29.924	17.1225
CG17083	0	0	0	0	0	0	0	0	0	0	0	0	0	0
CG17119	17.9768	23.4475	21.9057	18.7661	13.3075	16.6691	16.52	28.9788	31.1188	23.3631	15.2877	11.0215	19.0671	12.1251
CG17121	97.5222	109.847	107.402	115.036	65.1292	121.815	86.5308	23.2396	22.0133	22.203	72.3762	59.2463	60.5352	75.7946
CG17122	1.28739	1.89041	2.0092	3.55277	5.6649	2.73683	4.22444	0.985684	0.647531	1.12843	1.96398	0.641243	0.452524	1.6218
CG17124	45.1378	39.1731	43.0645	71.504	65.3716	69.723	77.573	21.4248	22.8732	24.7207	47.6623	32.013	23.4283	41.7437
CG17127	10.6158	10.2737	10.1195	178.636	174.072	115.812	93.1964	959.303	624.364	570.438	162.174	90.2084	39.9202	182.089
CG17154	0	0	0.156323	0	0	0	0	0	0	0	0	0	0	0
CG17163	15.2697	14.2448	14.765	33.1249	9.10648	9.46855	9.01102	28.8338	26.5897	24.5656	20.9374	13.8892	21.441	23.2856
CG17168	44.8759	45.6483	46.5233	91.2396	46.5552	49.523	41.8882	27.2027	25.1479	22.9832	39.1288	54.1766	48.9278	54.9005
CG17180	12.1259	13.1014	12.5038	17.2592	11.4843	10.6029	12.2257	8.61357	10.3086	9.22512	15.7418	16.0421	13.9581	22.2983
CG17186	6.44416	6.25872	8.55959	15.1675	3.06964	8.31106	7.77807	4.22948	3.25928	3.25662	7.76719	4.00162	5.0029	8.1102
CG17187	13.0131	14.8279	15.5633	16.1059	16.1854	13.8031	8.77385	4.90303	4.56466	2.91827	7.83024	7.4316	10.0407	8.79174
CG17190	66.7118	72.1663	77.6958	19.1789	18.9874	15.782	11.5309	22.7384	20.5551	22.3322	9.95418	12.316	3.98355	12.1529
CG17193	0	0	0.280462	0	0	0	0	0	0	0	0.542821	0	0	0.488998
CG17199	0	0	0	0	0	0	0	0	0	0	0	0	0	0
CG17202	32.4175	40.2065	47.9419	49.6122	24.9548	51.6973	30.3296	23.6843	26.508	20.3923	33.6859	15.0004	13.6365	29.0046
CG17209	9.4933	8.95308	9.9563	11.0811	6.7652	8.36088	6.56881	9.819	10.6837	8.80709	9.10336	9.10821	8.18361	13.0659
CG1722	6.61363	13.6262	6.1301	10.2181	177.447	179.545	292.007	0.381864	0.480814	0.475568	1.45833	7.34627	5.20825	2.73692
CG17230	13.4145	14.8077	14.7699	13.9093	13.0404	10.7234	11.1513	2.86551	3.1785	2.87678	5.21108	7.43768	6.03351	7.39364
CG17234	0	0	0	0	0	0	0	0	0.329139	0	0	0	0	0
CG17237	0.10837	0	0	0	0	0	0	0.134658	0.226067	0.0958289	0	0	0	0
CG17242	0	0	0	0	0	0	0	0	0	0	0	0	0	0
CG17244	17.2738	12.7755	19.4313	0.17816	0	1.56637	0	6.11463	7.83412	9.84809	2.86773	0	0	0
CG17249	12.9603	13.4348	15.3137	23.7663	14.0125	11.8345	6.58726	16.8936	13.36	12.7568	19.7076	13.1207	15.0087	26.1006
CG17258	0.356284	0.322621	0.587819	0.582072	0.368299	0.527996	0.332748	0.146033	0.0980655	0.103924	0.260256	0.249721	0	0.133972
CG17259	68.6925	79.6798	82.1859	77.123	54.6571	57.4516	41.8903	72.0471	76.1119	77.3453	67.679	48.7824	52.6806	63.022
CG17264	45.2789	51.4099	53.1778	1.97166	1.43213	1.56668	2.00122	0	0.090745	0	0.0917444	0.154053	0.380503	0
CG17266	11.0289	11.4861	10.9426	23.0645	8.1539	14.5815	11.6807	3.65498	2.83204	3.20131	8.23179	1.50244	4.45313	8.54402
CG17272	56.6956	54.2947	54.7823	61.7881	31.6675	36.0564	30.9745	55.4916	73.8614	68.278	67.5592	77.5991	63.5843	95.7512
CG17283	0	0	0.0410138	0	0	0	0	0	0.0455973	0	0	0	0	0
CG17287	0	0	0	0	0	0	0	0	0	0	0	0	0	0
CG17292	61.5643	66.4459	64.7305	87.3152	62.5096	71.89	58.2973	125.422	96.4683	100.883	67.7937	36.4097	31.5673	45.8435
CG17294	25.9475	25.4216	25.7277	42.9911	24.5135	33.4859	33.3399	16.2728	13.5806	12.7854	37.3589	26.9424	27.1481	38.0771
CG17300	0	0	0	0	0	0	0	0	0	0	0.226175	0	0	0
CG17321	7.02867	8.05038	9.04997	14.2776	13.515	16.2155	15.3688	4.3899	2.93644	2.24542	10.9146	30.2035	34.7656	18.5636
CG17325	539.09	520.959	460.686	1624.97	1549.77	1585.33	1156.48	111.429	42.6701	81.6938	96.8507	72.6786	74.6487	125.08
CG17327	51.6433	62.9025	61.0562	99.4515	79.2067	60.919	52.0761	17.242	15.8738	22.4295	44.1337	27.3445	25.4496	37.2063
CG17328	4.93725	5.73104	6.14166	10.9057	7.12832	7.75324	3.76416	4.65745	3.64889	3.62381	7.43085	10.3537	9.83581	10.7532
CG17329	0	0.872273	1.4127	0	1.7426	0	0.599767	0.308252	0	0	0	0.329451	0	0
CG17349	0	0	0	0	0	0	0	0	0	0.0687073	0	0	0	0
CG17350	182.143	193.63	192.76	72.6506	53.3052	50.0572	54.4047	485.16	407.984	389.199	95.5837	114.473	92.5693	212.668
CG1737	32.2807	38.9047	41.4596	72.6361	62.0113	75.1191	59.3999	31.9607	33.6211	33.2931	49.4609	45.2537	47.6636	77.6459
CG17378	4.94593	6.77585	6.84694	15.8819	11.3714	22.1638	17.4414	3.01986	2.39409	2.77589	12.9743	15.5998	7.52897	20.7784
CG1738	9.14593	6.50253	7.7543	19.767	7.53394	9.96988	7.74095	4.01061	3.59874	4.92093	9.33065	4.13861	11.6825	11.1016
CG17385	67.2861	70.4001	74.2961	133.078	82.2532	68.342	64.4835	52.0934	54.1173	56.7914	81.1292	55.8736	38.5243	81.1347
CG17386	0.815961	0.550074	0.637916	2.7772	3.81425	5.49891	3.41804	1.84422	1.52349	1.29161	1.93776	0.938596	2.16373	1.94704
CG17404	0.529633	0	0.0693505	0	0	0	0	0	0	0	0	0	0	0
CG17454	59.4241	86.5002	90.3344	111.794	164.302	169.841	133.948	56.2445	72.7713	69.8953	91.1132	514.347	437.237	204.167
CG1746	2477.85	2854.32	2826.3	5410.55	4463.05	3209.05	2653.3	1798.98	2275.24	2325.63	6325.33	3027.46	2996.04	4224.73
CG17470	1.64521	1.97174	2.66112	6.32427	3.93908	2.97869	2.03363	0	0	0.169372	0	2.2893	0	0
CG17475	0	0	0.0662203	0	0	0	0	0	0	0	0	0	0	0
CG17490	3.63617	11.1469	11.665	6.60057	0	0	4.24495	15.6332	18.7425	15.7094	15.5706	30.3225	29.5505	31.9958
CG17493	125.986	121.606	127.108	167.318	119.435	117.488	90.4889	271.68	219.984	227.543	313.277	239.605	231.102	430.858
CG17528	39.6112	50.4166	52.6504	70.8565	38.873	48.9446	39.7481	45.5307	44.8519	43.9704	49.2306	74.481	64.7519	82.7903
CG17544	39.9627	44.7068	38.4731	14.6747	12.1626	17.3016	10.5154	45.9197	54.746	42.9401	9.46015	9.24653	17.3078	9.70926
CG17549	8246.19	9237.74	8888.29	1032.01	914.631	888.926	773.774	13893.1	13847.7	13355.2	2470.43	2566.79	2511.22	2974.96
CG17564	0	0.0527269	0.0569296	0.338238	0	0	0	0	0	0	0.191583	0.16085	0	0
CG17568	9.57201	8.02261	9.07103	13.7496	7.15383	13.9402	7.9548	11.8895	11.075	12.0312	16.0292	14.3692	8.12237	19.6749
CG17570	0	0	0	0	0	0	0	0	0	0	0.50495	0	0	0
CG17572	142.407	175.993	163.42	85.2033	96.6842	88.9007	79.7487	103.812	101.321	87.6454	71.2062	73.1183	84.0078	79.1774
CG17580	0	0	0	0	0	0	0	0	0	0.449567	0	0	0	0
CG17593	78.638	80.8218	85.2606	122.415	65.6613	65.7011	56.848	109.611	101.775	92.149	119.444	98.0946	77.8242	132.925
CG17597	55.1616	75.2111	69.2098	77.3263	63.2181	61.9788	40.4643	108.956	108.863	112.07	77.4923	51.7255	48.7969	65.1113
CG17598	45.7051	46.1802	47.3709	58.1344	43.3023	42.0824	35.8202	77.1554	66.2131	64.4396	74.0211	90.691	98.0978	114.876
CG17599	11.385	10.8314	9.78758	16.0878	10.1963	20.7431	14.2993	13.366	11.8894	11.2155	52.3774	60.7654	72.235	74.8652
CG17625	0	0.124391	0	0	0	0	0	0	0	0	0.197389	0	0	0
CG17633	0	0.328624	0.399169	0.790534	0	0	0.112979	0	0.0506518	0.171768	2.84213	0	0	0.138396
CG17636	0	0	0.0667999	0.0496103	0	0	0	0	0.0368376	0	0	0	0	0
CG1764	13.509	15.7522	15.2998	25.7907	20.7663	23.3651	19.2149	20.6979	23.4872	21.2761	43.7916	41.3752	29.6801	50.658
CG17648	0	0	0	0	0	0	0	0	0	0	0	0	0	0
CG17650	1.83101	1.55439	2.74628	5.89211	0	1.99242	5.05244	0	0	0	0	0	0	0
CG17652	14.6673	11.3655	13.8346	24.3802	9.75162	17.9352	14.9327	8.73891	5.83308	6.21903	9.78416	4.7262	6.29996	8.33107
CG17658	0	0.036953	0.159593	2.60755	0.337479	0	0.203268	0.707668	0.685415	0.774786	1.38593	1.39631	2.20342	2.12246
CG17669	0.346784	0.294392	0.211904	1.36392	0.896194	1.25185	1.70934	0.190222	0.0798379	0.0338429	0.544839	0.203305	0.418459	1.2543
CG17672	0.417811	0.567503	0.765921	0	0	0	0.195105	0	0.17676	0	2.01045	0	0	0
CG17680	63.9223	69.5613	77.662	130.54	127.223	109.671	70.6179	38.6438	36.465	39.0702	91.601	41.0167	39.398	76.4059
CG17681	0	0.0602853	0.13018	0	0	0	0	10.3911	14.5863	13.7954	2.44547	0.933257	0.922038	1.10149
CG17683	68.3098	71.728	73.7669	95.0188	78.0364	88.2384	55.8122	107.532	108.819	107.569	131.571	147.82	134.702	200.223
CG17707	0.105086	0.285471	0.269696	0.114454	0	0.143753	0.196287	0.0258695	0.0868606	0.11046	1.18554	0.497675	0.865012	0.474659
CG17717	0.720245	0.40762	0.513461	1.19847	3.41243	2.73683	6.91346	0	0.0786678	0	0.238602	0	0	0
CG17737	223.959	268.004	274.975	355.639	293.666	217.677	202.716	353.964	404.898	432.469	530.67	355.227	370.95	546.96
CG17738	0.567464	0	0.346753	0	0.366624	0.646887	0.441646	0	0	0.596968	0.266961	0	0	0
CG17754	19.3117	25.0098	25.9243	25.8585	198.683	288.112	323.502	14.4576	25.5874	22.1947	26.0354	69.5964	77.2961	29.5196
CG17760	1.23781	1.20092	1.51274	2.40743	1.02821	3.32606	0.963365	0.148606	0.498966	0.158632	2.64842	6.35302	5.75359	3.15268
CG17765	162.273	151.516	152.955	217.652	139.63	135.343	127.922	62.8584	65.1919	63.2177	142.346	85.2259	84.3383	149.678
CG17776	82.3365	43.6542	42.7744	132.734	70.2872	74.2072	63.8494	55.6194	51.0452	48.2893	129.805	106.207	73.7386	167.535
CG17778	8.02791	8.48406	10.9623	10.2603	4.44569	14.8479	8.03309	10.5938	7.88585	8.39251	11.7046	11.9632	0.351768	13.5239
CG17780	0	0	0	0	0	0	0	0	0.0650797	0	0	0	0	0
CG17784	0	0	0	0	0	0	0	0	0	0	0	0	0	0
CG17819	0	0.284895	0	0.152298	0	1.33899	0.261188	0.138297	0.116088	0	0	1.77369	0	0
CG17821	0	0	0	0	0.769632	0.271594	0	0	0.0891137	0.151099	2.29741	0	0	0
CG17829	9.40104	9.0776	11.8022	29.9652	8.80841	18.2846	9.98669	5.40371	5.41537	3.88478	6.66827	6.95398	8.05425	8.85257
CG17834	108.314	113.456	114.609	61.8114	48.5279	73.4285	52.0266	83.7778	70.8507	70.8217	56.9962	72.6504	60.9177	99.1655
CG17840	16.1024	19.2899	19.7605	17.4323	11.9858	17.043	10.9845	17.166	20.0229	17.1027	13.4154	9.82741	10.3502	18.6926
CG17843	15.1153	14.7836	14.9255	66.3027	54.5753	33.5163	37.2279	19.6736	17.1733	15.6111	41.0937	44.7185	40.3935	55.4491
CG1785	29.9917	28.2321	29.445	46.8766	17.6333	24.3394	17.3794	23.0849	21.3424	21.5764	29.6576	20.2383	24.9937	49.2251
CG17855	0.783827	0.604914	0.522504	1.35816	0	1.58399	0.499121	0.266509	0.0745708	0.189661	0.904702	0	0	0.101875
CG1789	31.6934	25.1165	28.0841	52.113	34.373	38.7313	34.0273	18.7994	22.7836	22.2447	36.251	36.8556	28.9734	38.7797
CG17896	135.485	143.414	150.077	153.131	107.802	128.904	92.1172	76.4096	100.926	100.93	129.461	116.016	112.175	146.473
CG17904	57.6708	56.5685	56.0491	79.3351	55.6303	43.8157	42.9575	28.4735	35.4706	33.6544	41.9198	22.052	23.9655	26.1219
CG17912	36.7969	41.177	42.7421	50.279	70.089	129.044	112.08	25.3142	27.7639	24.6619	30.2142	57.9684	65.0378	40.9309
CG17917	0	0	0	0	0	0	0	0	0	0	0.888253	0	0	0.933544
CG17919	1168.7	1302.38	1294.49	1574.98	1486.97	1178.16	980.28	1685.56	1623.06	1628.31	939.848	870.685	849.365	990.369
CG17928	525.648	613.615	588.448	910.782	764.508	523.758	533.511	20.4039	18.3623	16.2502	32.5692	28.4382	23.8639	48.7041
CG17944	0	0	0	0	0	0	0	0	0	0	0	0	0	0
CG17959	0	0.119348	0.128861	0	1.08997	0	0	0	0	0	0	0	0	0
CG17982	17.5581	18.309	18.5012	24.5631	244.652	199.761	309.887	15.9086	20.375	17.799	17.1198	10.6924	14.8645	15.2342
CG17985	44.378	42.4967	45.6025	45.6793	38.9894	26.2574	28.6826	27.1608	27.9348	31.4672	33.1593	19.6166	22.35	36.5685
CG17994	1.03209	2.17289	1.96768	5.45191	4.72103	2.04719	2.98812	2.41272	2.06747	2.2178	7.61443	4.51264	8.22678	10.779
CG17996	40.5561	34.2792	31.1931	75.3799	47.1642	52.1622	28.8193	19.2433	20.9256	18.5187	79.3354	31.3175	56.5713	66.2028
CG18011	6.35827	6.45568	7.70601	9.8068	8.67989	12.3532	7.7927	3.08158	2.86931	2.63529	6.88965	6.42096	8.7956	11.1064
CG18031	0.371554	0.455607	0.491921	1.62995	1.60034	4.16498	1.83142	0	0	0.0367828	0.197389	0	0	0.177817
CG18063	0.111865	0.142448	0.205069	0	0	0	0	0	0.0577321	0	0	0	0	0
CG1809	0.727236	0.651662	0.59251	1.81516	0.939698	0.898105	2.82997	0.049776	0.167131	0.141692	0.316821	1.38318	0	0.513733
CG18095	0	0	0	0	0	0	0	0.455248	0.267499	0.161988	0.0579524	0	0	0.104412
CG1812	13.9164	14.7961	17.1209	25.7982	18.5932	21.3126	19.4009	6.10359	7.96587	7.97317	13.4641	15.4594	22.6602	17.834
CG18131	0	0	0.332918	0	0	0	0	0	0	0	0	0	0	0
CG18132	0	0	0	0	0	0	0	0	0	0	0	0	0	0
CG18135	80.7428	88.7772	107.01	556.225	371.542	273.461	280.327	82.2089	118.186	100.979	146.961	82.5365	86.2541	130.904
CG18136	4.98583	4.79914	5.5415	36.2912	23.5125	17.9907	17.9658	1.72745	2.0379	2.79092	28.825	20.3587	24.485	21.3624
CG18155	1.29617	0.984523	1.15679	0.975207	1.98337	3.03295	4.06171	1.40795	1.25349	0.910877	1.19487	0.638392	1.20137	1.32102
CG18179	16.7698	20.3658	20.9216	0	0	0	0	82.8268	102.895	111.135	0	0	0	0
CG18190	0	0.498567	12.8424	35.0666	0	30.8445	3.13427	0.204679	2.92078	0.655468	0.390831	0.875022	0	2.34719
CG18268	4.06841	4.78593	3.51596	1.42429	1.91505	1.0932	2.03552	3.96386	3.50881	2.82087	3.21105	4.00538	7.61006	8.43004
CG18269	0	0	0	9.2064	0	0	0	0	0	0	0	0	0	0
CG18273	9.95778	11.3909	11.7032	13.8449	6.26749	11.2653	7.83224	6.79394	8.13809	8.13808	9.79218	9.2015	15.2173	12.4485
CG18278	25.5859	24.6284	25.0022	26.6002	20.0005	17.8617	12.9352	19.4217	18.6939	17.5072	24.394	28.2301	14.4011	33.0815
CG18292	27.7674	33.3155	32.306	40.0213	32.8658	21.3979	24.5499	18.0278	20.6356	20.7345	27.2376	25.1063	34.1302	23.806
CG1835	1.50577	2.90519	2.25846	8.20005	14.062	29.2589	28.1258	0.306406	0	0.109027	0.390051	0	5.12275	3.16237
CG18371	1.13493	0.802887	0.693505	4.89293	4.39949	8.08609	13.2494	0	0	0.303458	0.271411	1.36722	3.00174	0
CG1840	40.5561	32.3332	31.6779	43.4514	7.17714	18.9954	24.7023	120.226	74.882	83.3029	95.9784	68.7241	64.5508	118.398
CG18418	0	0	0	0	0	0	0	0	0	0	0	0	0	0
CG18446	0.170899	0.616593	3.75945	31.0613	1.5734	11.2508	2.69341	0.882242	1.17619	0.775572	3.63349	3.32793	1.64396	5.41568
CG18449	0	0	0	0	0	0	0	0	0	0.230474	0	0	0	0
CG18467	0.790138	0.819828	0.563291	2.15146	9.69932	9.75789	7.78938	0.32386	0.271852	0.153649	0.961961	0.923019	5.50953	2.47594
CG1847	20.0769	22.0536	22.25	34.7053	19.9285	17.5813	14.9152	13.2336	13.8687	14.3262	20.828	13.2008	14.1148	26.0288
CG18473	0.356692	0.656076	0.272448	0.809356	2.3045	4.87938	6.52375	0.934281	0.361961	0.613737	1.46379	0.153621	4.67969	0.329661
CG18480	0	0.0321155	0.0346753	0.206018	0	0.517509	0	0	0.08135	0	0.493474	0	0	0
CG1850	0.0611072	0.155626	0.0840151	1.53908	4.55993	3.44816	4.56563	0	0	0	0	0	0	0
CG18507	149.211	163.852	157.469	115.239	102.705	104.106	83.9299	71.9637	90.1343	94.6578	67.5278	65.9856	73.1024	95.2125
CG18536	2.72343	2.03454	3.29506	810.521	747.876	679.908	649.359	0	0	0	771.997	725.611	723.982	1146.63
CG18537	0.110676	0	0	698.995	574.684	560.177	490.463	0	0.112442	0	304.548	283.466	260.964	445.014
CG18539	0	0	0	182.214	172.651	135.584	152.309	0	0	0.213369	887.003	1675.91	1181.15	1649.34
CG18568	0.0622964	0	0.1713	0.0848128	0	0	0	0	0	0	0	0.811408	0	0
CG18577	0	0	0.167293	0	0	0	0	0	0	0	0	0	0	0
CG18599	0	0	0	0	0	0	0	0	0	0	0	0	0	0
CG18609	0	0.134323	0	0.430836	0	0	0	0	0	0	0.631187	0	0	0
CG18622	120.415	138.302	144.456	105.474	93.5284	94.6244	72.3548	28.6111	26.7877	22.3188	54.2821	52.3366	53.7409	70.668
CG18624	475.589	497.102	559.541	1066.83	270.058	213.473	544.803	374.122	379.63	376.142	1039.09	414.588	445.678	615.082
CG18643	6.97954	6.5959	9.65639	19.1838	8.67834	9.68283	11.3766	7.33325	5.88205	5.79855	17.8405	7.31508	8.03015	7.662
CG18661	16.4956	13.7648	11.9411	21.9474	7.4481	16.347	12.6924	14.3915	13.8357	13.568	37.1102	33.9177	22.9461	33.8536
CG18662	0.142514	0.967862	0.391879	0	0	0.487381	0	0.352895	0.444338	0.753412	1.34769	2.64016	1.86315	0.809375
CG18666	0	0	0.150168	0	1.2702	0	0	0	0	0	0	0	0	0
CG18731	48.2583	38.741	49.8421	98.7886	116.919	58.0023	54.7047	41.4652	36.2876	38.1415	56.4346	43.374	50.8486	89.537
CG18766	54.0442	58.8974	53.9325	49.757	40.5906	38.9288	30.442	49.2078	45.5878	46.133	50.852	51.166	53.8657	67.4097
CG18808	0.378309	0.367034	0.24768	0.367889	0	1.94066	0.378554	0	0.111856	0.0474153	0	0	0	0.305623
CG18810	0	0	0	0	0	0	0	0.165064	0.138557	0.0587338	0.105062	0.882078	0	0.0946448
CG18812	301.663	339.401	334.279	313.753	238.611	347.024	243.176	452.257	423.919	434.23	371.22	625.376	521.919	820.682
CG1885	18.7789	23.1475	22.9958	23.2142	34.7962	53.1755	46.6518	36.6161	57.5037	55.3483	44.3697	40.8185	41.7635	46.2421
CG18858	93.3101	82.5275	89.2868	113.175	87.5545	88.6512	72.8139	110.263	104.59	97.709	99.2477	81.3223	77.1725	126.03
CG18869	0.0713791	0.121191	0.0327125	0.291535	0.276698	0.793352	0.166659	0.309317	0.111277	0.251571	1.06877	0.377816	0.622123	0.7601
CG1888	36.5801	30.8162	33.3749	47.1362	30.3549	25.2494	25.5965	21.8424	19.363	20.0476	36.1207	19.3448	41.3139	27.233
CG1890	36.5068	40.1444	41.4369	69.7886	81.7574	81.1843	40.1899	73.7033	65.8084	61.4709	106.97	111.886	107.815	175.77
CG1902	63.3548	73.3151	73.9019	91.1564	66.6975	77.7715	65.3976	129.076	111.456	112.992	142.635	273.268	267.407	200.662
CG1907	103.838	126.041	123.393	127.429	100.504	91.5845	83.0629	97.3196	100.79	94.0335	100.388	70.0917	73.8088	110.582
CG1909	25.9573	27.6612	28.4498	31.0855	24.8229	50.9611	30.6237	10.9464	9.84482	9.30465	5.91666	9.84215	4.12804	9.46448
CG1927	544.694	562.331	567.128	604.985	505.34	419.763	438.826	537.034	539.515	517.587	452.017	432.998	433.651	729.081
CG1943	175.801	157.475	194.916	337.529	91.594	180.608	81.1057	363.655	310.397	299.1	262.224	196.319	156.245	371.387
CG1951	18.2653	23.4597	23.3881	29.9559	13.5233	26.4178	17.2798	18.844	16.5381	17.1172	17.7084	15.326	14.6672	22.8043
CG1958	0	0	0	0	0	0	0	0	0	0.0788201	0	0	0	0
CG1968	45.214	44.0186	44.0761	44.2448	23.4931	29.2537	25.5243	20.9479	18.4034	16.6154	28.2198	18.6065	14.0305	18.9846
CG1970	421.431	448.608	460.811	950.358	532.977	495.442	434.219	302.764	305.98	304.635	984.367	603.211	628.063	983.979
CG1971	16.2975	14.1711	13.2702	9.37067	3.06682	1.48809	4.06382	0.796415	0.417827	0.35423	0.633643	0.638392	3.85439	0.342488
CG1983	30.6371	31.5023	31.0098	44.8332	30.1672	29.8358	29.4547	25.686	19.5239	22.0937	33.9853	18.3737	19.2206	29.4558
CG1986	0	0	0	0	0	0	0	0	0	0	0.820385	0	0	0
CG1988	0	0	0	0	0	0	0.0840503	0	0	0.0622477	0	0	0	0
CG1998	40.5378	46.8562	42.7462	38.9328	42.812	36.8057	31.1111	122.197	116.41	109.381	80.6129	75.7753	77.3957	97.5802
CG2004	65.5052	64.7524	73.7726	65.7864	30.6498	32.8162	26.1767	109.822	82.9169	86.1417	66.0603	58.3004	55.1146	86.8432
CG2006	3.88143	7.23825	5.19069	5.63084	1.97327	4.02573	5.64551	9.47591	6.82735	6.40633	8.84597	6.92051	5.0029	9.32717
CG2021	22.1211	15.9901	16.0601	51.5858	30.9894	11.6099	16.3642	23.6797	15.0792	19.3696	60.2878	18.6175	13.8911	50.2523
CG2023	22.4569	15.407	21.4238	32.0712	18.1213	21.0024	17.5491	30.9057	26.1327	32.3061	35.3074	32.1841	28.0916	43.2308
CG2025	17.7413	17.3247	18.6391	24.4748	15.4002	18.6425	13.3842	22.8348	22.4603	22.1537	34.8936	33.0542	27.0157	53.1995
CG2034	31.2899	30.001	30.8636	55.8981	23.3968	33.406	23.178	13.1157	15.5839	14.0007	23.0454	6.91014	5.20158	17.1591
CG2051	28.4619	24.947	29.5253	57.8439	26.9854	38.3021	24.9502	27.4215	27.1112	25.6437	46.3547	38.9862	32.7665	55.2664
CG2053	0	0	0	0.380234	0	0.358175	0.163024	0.0885289	0.371563	0.252006	0	0.75694	0	0
CG2059	64.1776	65.2632	61.4246	83.9707	55.2556	53.9457	43.5337	25.2601	28.1579	25.7216	53.7652	51.3903	44.3114	44.8015
CG2061	16.0398	17.6214	19.39	20.3498	20.2124	13.4163	12.9859	9.24242	11.9199	9.45218	15.895	16.616	12.4953	21.1275
CG2063	39.8214	41.7946	43.6002	62.1461	39.7083	56.5976	36.3237	16.2381	12.5001	12.8523	32.9726	18.4554	17.5644	35.2442
CG2064	9.96215	11.9363	11.6162	43.9505	40.2065	33.746	32.5346	66.023	48.1096	48.4794	56.031	44.3828	46.3948	53.0614
CG2076	170.667	223.617	243.566	328.133	181.539	171.32	203.3	143.798	202.031	201.88	250.651	164.234	194.348	217.085
CG2107	54.4351	52.302	53.44	63.3652	35.5521	30.3513	32.5573	60.6585	55.7224	60.6641	51.1524	39.3333	40.9022	51.7632
CG2111	0	0.0948632	0	0.212989	0.693083	1.52862	1.25236	0.0820907	0.0459387	0.0194732	0	1.16981	1.87809	0.533452
CG2113	0	0	0	0	0.661126	1.16652	0	0	0	0	0	0	0	0
CG2124	3.67182	5.05474	3.94162	5.62946	2.94932	1.92318	1.85365	5.5967	5.60398	5.23464	5.34339	2.56354	5.69863	5.13447
CG2129	7.42785	6.87547	6.80826	11.6356	6.93828	6.73319	6.79091	7.38644	11.0078	9.37036	11.3788	8.46648	8.19515	13.3809
CG2135	28.9964	29.9199	31.7208	27.4603	25.9844	60.8366	20.3248	82.9818	91.8887	87.0593	54.3935	50.1181	57.7682	58.2495
CG2144	20.4254	26.3143	24.0707	25.6689	20.1426	19.3821	14.2022	16.7159	17.1393	16.7131	19.0632	12.6387	17.8451	26.2348
CG2145	193.8	192.27	196.674	91.4419	100.686	153.313	70.9843	214.905	222.171	241.015	48.6648	24.3061	21.2064	73.374
CG2150	0.110676	0.0939549	0.202887	0.150678	0	0	0	15.5435	31.9836	30.15	11.3817	0	0	0
CG2200	52.3643	50.5619	53.7178	57.9532	37.304	44.6218	42.5085	16.6998	17.882	19.4264	10.7655	11.2124	6.59379	7.73393
CG2201	184.612	219.669	215.75	178.769	138.425	146.917	107.854	95.2434	93.0774	91.2434	246.175	258.07	254.695	343.608
CG2224	18.1814	17.0747	19.5255	28.8671	14.4991	16.9423	12.4923	24.3383	24.6654	25.896	22.2166	20.3021	25.9083	34.2412
CG2254	1686.6	1750.84	1737.7	4341.89	3255.16	3032.98	2992.28	805.034	905.505	928.941	2411.54	3174.13	2772.92	3442.9
CG2263	38.6894	43.7687	43.734	42.0931	27.0478	23.4334	20.5836	38.4546	48.0084	44.731	38.336	22.5579	34.4265	46.2236
CG2267	0.160054	0	0	0	0	0	0	0	0	0.0482956	0	0	0	0
CG2291	0	0	0	0	0	0	0	0	0	0	0	0	0	0
CG2316	117.688	205.744	206.546	158.789	146.399	190.663	129.439	78.1309	101.25	101.56	103.053	161.2	138.681	206.957
CG2321	2.26515	2.44487	3.05498	5.06634	4.82942	6.30791	3.0977	0.950523	0.698146	0.704623	1.15959	1.69315	2.2304	2.0438
CG2336	0.0646182	0	0	0	0	0	0.301745	0	0	0.056721	0	0	0	0
CG2444	1.09511	0.619772	0.167293	1.7394	0.353761	7.80236	6.8184	0.456873	1.15052	1.30053	7.56073	15.6254	4.42222	3.14356
CG2453	29.7243	25.5857	29.6525	48.0908	29.3422	26.0044	27.7606	15.0398	16.0347	16.7312	26.9577	16.998	35.8993	25.375
CG2493	132.245	128.739	122.82	137.999	104.855	73.105	64.5361	78.276	61.8299	76.2703	145.075	96.8377	88.0449	98.1735
CG2533	0.115594	0.0981306	0.317857	0.786874	0	0.79064	0	0	0.474615	0.100594	0	2.11503	0	0
CG2540	19.9373	20.1057	22.4442	23.8643	19.5809	16.0162	17.3392	6.69889	7.79108	8.78781	8.32211	7.07332	7.52804	12.3098
CG2543	3.12833	5.03348	4.4011	4.11045	1.4806	3.91864	1.35891	1.1261	1.32337	1.18605	1.37617	0.5777	1.82325	0.87813
CG2556	5.00253	5.3742	7.42566	7.5339	0.429029	10.5979	2.68746	3.43347	5.39233	4.65039	7.6136	8.52295	8.77134	9.27189
CG2574	0	0	0	0	0	0	0	0	0	0	0	0	0	0
CG2577	0	0	0	0	0	0	0	0	0	0.0530829	0	0	0	0
CG2604	774.071	970.634	915.651	1686.34	1037.48	756.339	692.901	550.642	520.088	521.353	920.822	803.761	802.495	1198.35
CG2608	24.0709	25.3523	25.279	55.9884	26.8858	42.6945	27.053	6.80233	6.81788	7.29744	16.1554	7.59568	13.9367	18.3956
CG2611	7.72379	7.62741	10.547	17.812	15.2761	11.5901	7.72881	26.9417	24.5676	21.5179	27.6345	38.5307	14.6676	26.6726
CG2614	13.8816	15.6163	17.0311	20.9615	10.187	11.5248	10.0338	11.9549	8.66087	9.13084	13.5705	15.1371	19.6319	20.1712
CG2617	4.70816	4.51258	4.31543	13.957	7.65362	5.32383	2.48224	0.969128	1.05754	0.551741	0.740211	1.86439	2.04664	1.22249
CG2680	3.00166	1.27409	1.62576	3.15782	3.17341	1.86642	1.75211	4.20805	4.59198	4.01283	14.4633	8.45519	10.516	24.2247
CG2681	0.33238	0.507897	0.487448	0.226258	0.386538	1.02303	0.310423	0	0	0	0.103559	0	0.0715838	0.279871
CG2685	15.3037	15.4876	16.7566	29.5591	16.8036	18.8207	14.9616	8.51294	8.4978	7.43361	15.8746	10.5247	13.3621	18.1527
CG2691	17.1537	19.2844	20.477	35.4094	16.318	24.1391	14.6025	14.482	18.6554	17.9828	15.6464	16.9067	15.7167	27.8707
CG2701	32.1872	41.287	38.6358	47.9447	21.8927	24.7357	29.6774	21.0517	23.206	22.5088	32.001	24.0044	28.5267	43.8719
CG2712	5.48209	6.24038	7.61332	11.4215	5.55426	7.17257	5.33326	3.67599	4.15538	3.73218	8.11111	9.42912	7.15934	8.88064
CG2750	0.0221116	0.0563131	0.0608016	0.135466	0.750003	0.642762	0.980915	0	0	0	0	0	0	0
CG2765	60.1091	71.6719	74.4803	122.286	88.7896	63.544	105.359	78.5669	92.7958	86.258	155.247	122.594	161.157	223.594
CG2767	409.753	416.086	402.934	201.65	179.334	114.738	125.366	467.069	397.433	436.877	638.485	587.291	603.3	818.714
CG2772	2.80094	2.54762	2.1547	0.340474	0.775553	0	0.583907	0	0	0	0.159263	0.267427	0	0
CG2789	912.133	1027.92	998.417	470.542	479.584	698.691	425.151	596.379	681.408	702.968	271.174	171.794	203.597	231.37
CG2794	10.5521	12.4654	12.2602	11.8166	6.16454	6.96328	5.96854	4.64847	5.59184	4.66257	6.84933	7.66739	4.76672	6.92571
CG2807	40.1078	42.2606	42.9533	56.1476	31.6911	25.3831	25.5957	40.4474	36.2904	36.252	48.6718	48.8571	37.1357	70.6476
CG2811	57.2524	48.6028	47.0104	84.0802	53.9429	44.4168	39.6075	61.0737	59.5795	55.2096	115.569	73.0361	81.0471	118.306
CG2816	66.8798	73.8085	70.3826	52.2709	26.4057	39.3908	46.2677	3.39077	1.81125	1.75493	20.0124	19.1082	5.96733	14.4932
CG2818	27.3699	30.4053	31.5609	34.1773	16.1429	33.4652	24.0501	22.3596	23.2407	19.6517	30.1704	35.1682	37.8194	44.5085
CG2837	2.0399	1.38538	1.04706	14.4415	17.5549	11.4411	13.1455	0.101527	0.0852235	0.650268	44.2011	20.6168	42.7035	13.1564
CG2852	393.608	412.12	471.11	468.025	213.25	301.812	219.682	687.657	604.391	613.344	876.975	949.281	1019.93	956.992
CG2854	0.0847534	0.071949	0.038842	0.0576934	0	0	0.197886	0.460528	0.472479	0.58264	0.846801	0.437512	1.80104	1.81907
CG2862	178.801	163.682	170.752	361.458	227.454	186.195	170.358	115.985	104.805	105.967	259.034	145.472	135.678	190.513
CG2875	14.8203	15.5667	17.2679	28.9544	11.1979	16.9662	9.97037	7.3763	6.27836	6.49744	12.1478	7.05664	9.16863	14.7291
CG2889	10.3856	14.0761	12.5392	17.1135	16.8673	13.5947	14.8837	7.67104	9.67737	8.86707	14.2244	9.57293	17.3238	15.4072
CG2898	0.71135	1.40906	2.28205	2.50186	2.18304	2.73683	2.21453	0.295779	1.11726	0.789342	0.0941308	0.632241	9.49975	1.18716
CG2901	0.0961802	0.0272165	0	0	0.124279	0.109642	0.14971	0	0.131757	0.0279255	0.0499528	0	0	0.134999
CG2906	7.43759	7.74717	8.40649	7.51672	6.01393	6.00782	6.39224	5.06075	5.61689	4.92202	9.09076	10.8176	12.9636	11.9939
CG2909	15.2859	15.6349	14.313	16.0429	18.6071	35.7902	26.6474	13.0214	14.2179	13.8275	29.008	25.9854	23.274	26.4816
CG2911	19.7837	17.4705	18.0292	27.5535	24.021	27.802	17.2556	6.03689	5.42941	3.47783	7.86785	10.4462	1.01182	6.75805
CG2918	257.687	233.358	247.226	184.758	295.89	333.277	326.646	362.136	254.936	269.066	221.168	434.974	387.507	323.53
CG2921	21.4164	20.8415	22.2234	36.2686	24.2985	23.8928	16.8712	13.2446	13.9752	12.3402	37.309	30.5848	27.5212	36.5985
CG2924	45.1255	50.8994	54.0917	137.713	53.941	84.7797	60.084	62.6701	64.1036	60.8755	79.0381	708.332	689.037	167
CG2926	39.2759	41.2431	44.6052	64.3043	146.508	217.207	259.557	49.4173	43.4962	44.0728	60.435	531.284	585.714	111.714
CG2931	23.9763	23.9803	24.6287	39.3958	20.4314	19.91	19.7864	19.9461	18.7211	16.0513	27.2125	14.032	24.4385	30.4015
CG2938	18.4656	21.5774	23.7176	38.2848	21.3808	22.2884	19.331	13.7062	16.231	16.0889	25.8528	31.9438	37.2452	29.3736
CG2964	0.0375578	0	0	0.0511326	0	0	0.0876915	0	0	0	0	0	0	0
CG2972	26.8023	25.9714	27.6778	46.5723	24.0092	36.0311	17.4974	28.373	23.2202	23.6541	32.8476	28.1624	35.9825	53.8524
CG2990	0.0567464	0.0963464	1.43902	5.07319	0.659925	1.29377	0.927458	0.232802	0.429917	0.447317	0.889061	0.995248	0.860373	0.774209
CG2991	89.5592	113.116	110.798	102.524	147.609	171.5	228.816	85.055	114.081	110.186	110.306	691.36	704.768	146.438
CG30008	0.234666	1.06247	0.716969	5.00522	0.454835	3.61138	1.46109	0.386188	0.243128	0.824486	2.82676	0	3.3982	1.99289
CG30015	67.5021	75.1364	77.0161	105.153	89.0432	141.828	89.2204	39.4039	41.2438	45.0951	64.2601	77.479	84.5873	110.098
CG30016	3.68266	1.40683	1.68773	0.752057	3.92581	0	1.71968	0	0	0.162567	0.581594	0	0	0
CG30022	191.589	184.929	181.418	70.9709	52.6152	88.3731	43.0091	67.8608	83.4665	80.3828	100.991	118.44	94.6959	134.936
CG30026	141.178	114.116	139.857	14.5365	15.0348	9.20679	11.5061	178.707	182.273	161.305	8.42563	6.45345	8.99161	16.2457
CG30033	631.145	362.102	356.635	0.472125	0	0	0	1446.83	984.688	1143.73	1.08564	0	0	0
CG30051	17.3622	29.9461	31.8278	32.267	20.832	17.2003	17.0517	9.31902	10.9515	11.8168	22.6475	18.8332	19.6803	40.6095
CG30053	3.41608	3.05816	2.67569	3.1287	4.81537	2.76133	1.88523	4.64949	4.60664	3.90547	9.12069	9.9385	21.3282	11.8875
CG30065	0	0	0.459552	0	0	0	0	0.308252	0	0	0	0	0	0
CG3008	45.7547	51.7017	47.9473	64.923	42.2013	26.1973	34.3209	34.5753	31.2447	31.4819	60.8067	38.0756	33.4923	55.4519
CG30080	0	0	0	0	0	0	0	0	0	0	0.283211	0	0	0
CG30083	1.04408	0.823034	0.751921	0.101532	0.578189	0	0	0	0	0	0	0	0	0
CG30093	0	0	0	0	0	0	1.03364	0.550213	0.461857	0.391558	0	0	0	0
CG30096	3.99038	6.45245	5.74757	10.9947	10.6807	23.2318	6.43311	1.7569	2.67302	2.89131	5.03216	4.45961	3.67166	9.44414
CG30098	1.81273	1.53887	1.58929	0	0	0	0	0	0	0.06923	0	0	0	0
CG30099	0	0.325595	0.26366	1.04433	0	2.13145	0.895504	0	0	0.0933715	0	0	0	0
CG30101	1.71277	1.66942	1.80248	2.4182	1.35249	5.53207	4.29527	0.0759196	0.446096	0.216112	113.654	27.9125	20.3085	33.1706
CG30105	8.45705	5.58393	6.89031	21.7482	5.72407	11.477	4.7014	5.31635	6.1361	6.85735	17.765	13.8498	19.5894	26.6726
CG3011	81.7559	95.0609	93.4039	57.4462	43.1825	52.9375	33.3825	35.3563	41.6054	40.4461	36.355	25.9319	35.8881	35.0238
CG30118	278.682	282.579	339.391	355.137	251.396	291.671	214.473	207.123	246.773	235.73	571.379	455.277	507.524	548.114
CG30122	63.2231	68.945	74.2898	99.4022	61.9685	84.3981	58.6719	92.0573	90.2038	91.9557	104.201	177.254	180.601	187.438
CG30148	9.22889	6.69504	9.38187	28.3274	39.3531	28.4056	18.4138	1.87206	2.26986	1.92437	14.8283	3.557	6.22314	25.0462
CG30152	57.6488	60.9312	61.8509	113.83	67.8928	78.8282	74.6544	40.5475	38.4465	36.5775	68.4827	43.214	51.0565	80.2916
CG30154	11.3789	4.69188	6.25781	12.3932	4.41095	14.4539	9.10896	12.7925	3.69125	8.53475	31.0425	11.1087	0	16.0453
CG3016	31.6579	34.9155	37.3567	44.0142	32.7399	34.4948	26.3801	19.1194	25.3917	23.7617	37.5076	30.602	25.5203	30.0813
CG30172	2.04355	3.46962	4.08673	3.54094	2.88062	5.71802	2.16881	0	0.773921	0.656124	6.74859	2.46346	6.49025	2.3789
CG30178	0.111267	0.0944573	0	0	0	0	0	0	0	0.0978893	0	0	0	0
CG30183	5.41919	5.81587	7.07666	10.8938	5.10917	8.07673	4.9987	5.47659	5.71871	5.48217	7.55959	8.1099	9.69616	12.2202
CG30184	0	0	0	0	0	0	0	0	0.497138	0.337175	0	0	0	0
CG30192	0.297243	0	0	0	0	0	0	0	0	0	0	0	0	0
CG30197	1809.1	1877.02	1764.36	1639.98	1103.15	968.499	813.411	2764.08	2605.16	2684.79	1373.15	897.971	923.439	1033.18
CG3021	19.4698	21.1599	22.5033	28.7644	14.7216	18.7497	14.9865	12.1644	17.3143	14.2084	23.9851	20.0667	22.2222	28.8849
CG30222	0	0.0949649	0.0512672	0	0	0	0	0	0	0	0	0.147409	0	0
CG30268	0	0	0	0	0	0	0	0	0	0.0294699	0	0	0	0
CG30275	0	0	0	0	0	0	0	0	0	0	0.0499273	0.335342	0	0
CG30291	70.5152	71.4869	70.2533	72.9056	51.738	35.439	43.9043	41.8525	37.1185	35.9489	46.3535	44.9999	49.3693	63.5889
CG3032	2.12415	3.56549	3.36294	5.12655	3.18138	2.80668	3.2688	4.73351	3.97338	3.53915	8.46649	9.22155	9.2794	9.75705
CG30324	0	0.107704	0.116289	0	0	0	0	0	0	0.223404	0	0	0	0
CG30343	0.920666	1.87577	1.35019	1.00274	0.713783	0	0	0	0	0.328062	0	0	0	0
CG30349	24.2301	24.9853	26.3308	41.7602	20.6848	37.9315	20.0592	22.9112	22.5467	21.7201	32.5169	32.7958	28.9557	54.34
CG30350	0	0.0478686	0	0	0	1.34987	0	0	0	0.14843	0	0	0	0.159455
CG30355	0	0	0.102534	0	0	0	0	0	0	0	0	0	0	0.310475
CG30357	5.02874	6.0706	4.60927	6.97195	3.93451	11.8333	6.78627	0	0	0	0	0	0	0
CG3036	271.42	268.894	325.607	148.992	99.7175	126.944	102.385	213.791	184.254	176.787	164.123	109.341	114.794	189.9
CG30369	0	0	0	0	0	0	0	0	0	0	0	0	0	0
CG30373	63.6064	60.7044	70.2505	125.143	112.818	57.1963	59.0352	24.9331	25.3065	25.3977	74.0588	51.5538	41.5847	71.3874
CG30376	0	0.0781574	0	0	0	0	0	0	0	0.222948	0	0	0	0
CG30377	0.579906	1.26027	2.44505	13.1373	10.5205	62.5504	18.2517	10.2171	14.672	14.9625	6.48519	50.1165	40.37	9.36035
CG3038	12.924	13.7939	14.4018	26.7943	8.73095	18.4312	10.1419	4.19855	4.2402	3.50144	3.67448	6.31025	1.84723	7.97442
CG30382	236.211	232.666	248.085	926.444	619.476	491.396	575.408	179.726	173.755	171.285	281.864	228.883	238.472	320.082
CG30383	0.0819176	0.347707	0.450506	2.00745	1.42897	0.70037	0.382528	0	0	0	0.129243	0	0	0
CG30391	0	0	0	0	0	0	0	0	0	0	0	0	0	0
CG30392	39.0948	41.5845	38.9125	43.571	56.4241	36.3765	33.5492	29.9637	27.4302	24.9548	47.1264	56.6227	42.7972	64.8631
CG30398	0	0	0	0	0	0	0	62.1083	74.5444	76.326	106.912	105.415	101.961	120.655
CG3040	37.8548	36.5887	39.9057	48.2043	31.8563	40.6614	30.6183	37.6757	40.1435	40.1025	54.5569	41.0744	59.275	70.5642
CG30401	0	0	0.0693505	0.103009	0	0.388132	0.176658	0	0	0	0.119301	0	0	0
CG30411	84.7035	90.4475	94.816	1.00452	0	0.252332	0	8.15749	10.2713	6.9927	3.30413	0	0	0
CG30412	0	0.117366	0.12672	0	0	0	0	0	0	0.0596968	0	0	0	0
CG30413	0	0	0	0	0	0	0	0	0	0	28.2267	0	0	0
CG30417	0	0.0659086	0	0	0	0	0	0	0	0	0	0	0	0
CG30423	136.236	143.551	142.279	242.357	197.163	163.493	123.766	158.204	157.624	158.355	232.466	184.135	213.565	205.648
CG30428	20.0159	25.32	23.9299	18.4182	34.8084	26.7856	20.5037	22.6364	24.9892	23.9608	31.3585	38.0179	20.086	49.2997
CG30429	0.272879	0	0	0	0	0	0	0	0	0.0598929	0	0	0	0
CG30431	1.74221	2.49317	3.0569	0.406614	0	0	0.232446	1.72621	1.50076	2.10592	0.0784802	0	0	0.565587
CG30432	0	0	0	0.425977	0	0	0	0	0	0	0	0	0	0
CG3045	4.54502	4.24774	5.77108	12.035	6.95044	6.20311	3.89428	4.05865	3.53626	3.98517	5.55901	8.34609	6.78105	7.83575
CG30479	0	0.660321	0.178237	0.794228	0	1.33005	4.99432	0	0	0	0.651386	0	3.6021	1.467
CG30480	0.474943	0.287992	0.248758	0.708186	0.920547	1.50823	2.05941	0.0551399	0.0925703	0.176581	0.45625	0.942912	1.11595	1.04333
CG30487	0	0	0	0	0	0	0	0	0	0	0	0	0	0
CG30491	23.3843	25.6148	25.6974	30.8093	29.4851	32.999	22.7495	14.7307	15.0985	11.1451	25.9568	26.6815	31.2454	40.1867
CG30495	63.3118	57.6363	57.0976	61.766	56.2382	42.7599	41.45	26.4482	22.1351	18.9894	7.39302	10.7365	8.97762	9.53991
CG30503	32.5936	29.4052	29.7646	13.4269	15.8517	14.3961	10.9518	189.54	168.761	165.375	26.7878	11.3261	33.8362	28.1246
CG3061	164.994	176.397	179.787	217.586	149.325	151.354	134.977	284.076	248.262	248.868	200.992	153.664	161.385	230.971
CG3062	0	0.140187	0.15136	2.02339	0	0	0	0	0	0	0.603134	0	0	0.434664
CG3071	20.1069	19.6114	19.927	38.8642	13.4177	18.5542	15.6186	13.3674	13.3121	11.7633	19.8831	15.3621	18.2972	24.1202
CG3077	24.5089	29.0961	30.0111	41.883	34.5145	56.9697	35.6162	35.4433	28.3724	26.5038	32.6689	12.0416	14.0449	24.0461
CG3078	4.42464	4.68333	5.80101	7.51078	7.81607	7.37434	5.95004	0	0.0870661	0.0492093	0.572163	0.812942	0.425923	0.792969
CG3081	0.142758	0.242381	0.13085	0.923198	0.76092	0.915406	0.333318	0.0902467	0.0378771	0.0321119	0.689296	0.289359	0	0.310475
CG3088	33568.8	26239.6	28250.2	0	0	0	0	23658.8	26103.7	28679	0.512901	0	0	0
CG3092	0	0	0	0	0	0	0	0	0	0	0	0	0	0
CG31007	0.354665	0	0.216721	0	0	0	0	0.139808	0.117357	0	0.355948	0	0	0
CG31008	0	0	0	0	0	0	0	0	0	0	0	2.44148	0	0
CG31016	0	0	0	0	0	0	0	0	0	0	0	0	0	0
CG3104	51.8555	84.5756	75.3351	55.4195	44.9772	40.2339	55.0888	37.0182	38.5232	43.641	49.3628	45.1183	49.3881	62.7139
CG31041	0.420344	0.178419	0.770561	1.28761	0	0	0.981437	0.51949	0.109017	0.831811	0.495978	0	0	0
CG31050	0	0	0	0	0	0	0	0	0	0	0.407116	0	0	0
CG31051	4.90732	3.66602	4.85781	17.3707	14.077	18.6285	9.62455	3.04582	2.35217	4.16171	21.2475	15.8858	10.9349	22.4939
CG3106	0.0841254	0.0714159	0.0514054	0	0	0	0.130946	0.0687766	0.115464	0.0244724	2.71411	0.441039	1.75505	0.591529
CG31068	0	0	0	0	0	0	0	0	0	0.0244395	0	0	0	0
CG31093	0	0	0	0	0	0	0	0	0	0	0	0	0	0
CG31125	2.12859	1.85218	2.39002	3.40509	0.618855	0.545966	0.74549	1.04162	1.20224	1.20457	3.06631	3.20063	1.9477	3.7328
CG31128	0	0	0	0	0	0	0	0	0	0	0	0	0	0
CG31142	20.807	13.3331	15.8723	22.662	13.2694	7.3453	12.5371	11.9618	9.62254	12.5324	12.6893	9.2332	13.7418	19.0518
CG31156	13.8055	13.6203	14.9473	19.8711	10.6778	17.1889	10.4542	3.4839	3.99825	3.66086	7.62259	10.2396	8.71784	12.5163
CG31157	0	0	0	0.0731975	0.625252	0.36774	0	0	0	0	0	0	0	0.227441
CG31174	0.512488	0.435062	0.563687	0.139544	0	1.75265	0.239316	0	0.101784	0.0862913	0.154357	0	1.92055	0.695257
CG31178	0	0.0813988	0	0	0	0.491872	0	0	0	0	0	0	0	0
CG3119	2.46167	3.03514	2.57867	4.78774	4.31688	3.50776	2.05272	10.5222	6.11017	6.71882	0.642211	0	0	0
CG31195	92.4842	89.0835	93.1591	113.064	94.5001	140.728	69.5306	65.318	55.1219	58.4814	76.3481	93.941	95.0606	126.288
CG31200	720.769	752.069	698.792	627.992	495.588	403.519	412.598	26.9449	22.5466	22.3208	47.826	38.3368	38.4443	50.6868
CG31211	61.7068	66.9154	68.8882	71.1752	57.4476	149.642	84.878	37.5621	40.5387	37.6175	88.5748	140.873	156.783	134.426
CG31226	0	0	0	0	0	0	0	0	0	0.357009	0	0	0	0
CG31235	0	0	0.093948	0.488405	0	0.0876325	0.239316	0	0	0.128222	0.917444	0.641888	0	0
CG3124	0	0.0624155	0	0	0	0	0	0	0	0.397254	0.236867	0	0	0.21338
CG31248	83.7253	93.0324	86.695	88.142	61.0554	52.5886	50.7102	1.10757	1.11565	1.26112	18.47	37.8797	10.5256	26.4185
CG31249	12.7339	14.4134	16.0962	22.5486	16.2928	23.482	13.4084	8.16102	9.71203	7.05754	17.7531	14.7947	15.6349	16.5851
CG31251	7.13965	5.19515	4.86134	9.07221	2.89945	9.53418	4.28657	1.58343	1.32916	1.06754	4.03137	6.41302	4.83995	4.10949
CG31259	0	0.0776418	0.0419152	0.249032	0	0.31278	0	0	0	0.0779204	0.8363	0	0	0
CG31262	0	0	0.527016	3.22903	0	2.33505	0.251716	0	0.686955	0.183914	0	0	0	0
CG31275	0	0	0	0.84141	0	0	0	0	0	0	0	0	0	0
CG31278	11.1903	10.8356	9.61582	13.9257	9.65856	13.1551	10.4102	7.01695	4.80273	5.07043	9.34476	8.99943	13.1089	15.227
CG31286	0	0	0	0	0	0	0	0	0	0.168588	0	0	0	0
CG31287	0.281176	0.159131	0.257721	0.255202	0	0	0.437667	0.115247	0.29022	0.164031	0.733542	0	0	0.792969
CG31301	37.9645	43.5754	45.615	76.7874	37.5727	42.0623	31.539	31.1183	29.8055	27.6315	46.4899	47.7526	62.6867	71.9515
CG31326	218.593	233.906	221.962	66.2427	54.8315	30.721	30.9237	160.563	137.512	139.189	94.2541	61.2613	62.5042	95.9959
CG31337	0.800269	0	0	0.27238	0	0	0	0	0	0	1.75103	0	0	0
CG31345	11.0385	12.522	11.6398	20.3479	15.147	21.5477	18.0184	27.1538	25.8324	22.5876	121.213	77.9059	63.2915	144.07
CG31357	39.4488	42.1862	44.4354	64.9231	32.7543	48.6725	36.1276	47.7194	52.188	55.0856	61.4921	128.164	155.013	77.1197
CG31360	34.8199	40.9145	35.2237	59.8346	30.8638	38.1201	29.7436	0	0	0	0	0	0	0
CG31380	0.256877	0.0872273	0.0470899	0	0	0	0	0.0627081	0	0.0892524	0.0798266	0	0	0
CG31381	3.75137	3.33274	3.67834	7.36395	6.51008	3.43108	3.4628	1.95553	2.37106	1.97151	3.9415	1.62557	8.50814	4.48507
CG31407	0	0	0	0.181586	0	0.228069	0.934252	0	0	0.115971	0	0	0	0
CG31437	0.0785169	0	0	0	0	0	0.366649	0	0	0	0	0	0	0
CG31446	0	0.228407	0	0	0	0	0	0	0	0	0.422977	0	0	0
CG31463	0	0	0	0	0	0	0	0	0	0.095327	0	0	0	0
CG31464	0	0	0	0	0	0	0	0	0	0	1.92455	0	0	1.86708
CG31468	0	0	0	0	0	0	0	0	0	0	0	0	0	0
CG31477	43.2395	32.0152	28.0111	7.52448	6.30136	5.55918	4.55448	0.419425	0	0.596968	4.8053	0	5.16694	0.961966
CG31482	0.213405	0	0	0	0	0	0	0.509152	0	0.452922	1.29629	1.6325	1.56807	2.77342
CG3149	29.1522	34.6917	35.0557	40.7589	18.8587	19.7731	24.8148	47.1131	53.6715	48.0611	64.8451	42.7658	48.1902	54.3977
CG31496	0.0773496	0.196991	0.28359	0	0	0	0	0.092032	0	0	0.117156	0	0	0
CG31516	1.09069	1.70938	2.38393	0	0	0	0	4.98408	8.73928	7.09381	1.12794	0.473496	1.75427	1.52415
CG31522	438.885	544.377	542.255	443.46	406.38	491.767	362.029	1155.32	1084.76	964.893	1043.02	1281.97	1183.26	2084.01
CG31523	975.634	950.137	1052.54	514.375	387.68	398.905	346.381	2379.4	2210.18	2038.67	663.841	667.576	727.945	1283.55
CG31528	0	0	0.0554401	0.0823473	0	0	0	0	0	0.0521704	0	0	0	0
CG31546	0	0.0669075	0.216721	0.107301	1.37484	0.67384	0	0.583686	0.89825	0.484609	3.34361	1.87148	1.54081	3.45831
CG31548	101.434	94.3895	98.3369	48.4665	36.5479	28.3518	21.6338	22.3742	26.698	25.2048	29.1207	14.3692	27.722	13.692
CG31550	53.7181	57.8737	57.7183	79.7731	69.9451	131.581	71.3534	24.1888	23.489	21.3176	45.3188	45.2173	53.9459	65.1184
CG31560	0	0	0	0	0	0	0	0	0	0	0	0	0	0
CG3160	10.4035	12.2022	13.5252	19.6847	12.0986	15.6474	11.8478	17.6564	17.689	17.5207	21.6133	23.916	25.5654	39.1198
CG31609	0	0	0	0	0	0	0	0	0	0	0	0	0	0
CG31612	1.72864	2.30861	2.33804	3.55887	3.14621	4.68616	1.91961	0.0774516	0.0433428	0	0.13146	0.275927	0	0.207244
CG3163	14.9833	14.4956	17.724	25.8642	19.9452	20.3998	18.482	18.8956	14.7614	15.3119	28.1799	22.1114	24.2729	29.3398
CG31635	49.7662	54.0382	54.6513	74.2769	308.101	352.892	376.971	36.8353	37.0631	36.0842	46.5138	92.816	108.523	79.4874
CG31644	0	0	0.219212	0.325603	0	0	0.558404	0	0	0.395814	0	0	0	0
CG31646	4.25754	3.9058	4.28005	7.24547	8.98412	11.8596	6.97452	3.33532	3.15412	3.00453	9.62029	15.5223	13.4484	13.7501
CG3165	31.6551	31.9554	31.9487	42.8544	28.1497	26.7601	24.3598	9.65344	10.9365	10.9052	16.4135	6.4934	9.97942	9.28967
CG31650	24.4574	28.9227	32.3433	101.466	85.3743	48.4787	55.5416	16.2813	16.9417	12.8146	57.4021	44.5851	54.5332	75.8018
CG31663	8.2711	8.10035	7.66013	13.108	7.72341	15.911	11.2652	7.79628	6.40604	5.64588	22.8893	31.3346	20.5323	45.0487
CG31673	67.846	69.6248	66.2821	64.5623	53.8128	51.9494	30.2514	23.6168	18.4366	19.6641	36.9787	32.1402	15.5167	30.9648
CG31674	15.8439	15.6109	15.1638	22.61	15.1695	18.7142	9.80536	2.34963	1.31488	1.22622	2.69195	0.669659	3.72155	6.10748
CG31676	234.766	302.613	312.219	268.666	197.332	240.549	243.823	243.781	281.759	272.768	498.166	452.645	431.288	583.844
CG3168	34.7332	40.8609	40.9794	149.75	395.949	549.276	578.438	35.7064	35.5017	29.3549	178.083	2280.97	2374.24	289.345
CG31688	24.4725	27.6393	28.3601	24.8049	82.1201	84.4305	169.405	14.2238	20.8381	18.3348	24.2562	92.0724	73.443	44.4714
CG31689	57.6168	57.3851	71.0761	97.7416	79.6083	137.108	113.909	192.502	172.396	173.7	118.481	124.627	106.36	163.485
CG31698	0	0	0	0	0	0	0	0	0	0	0	0	0	0
CG31706	3.26036	4.02587	2.66239	7.18275	8.73214	5.67639	4.29064	5.89274	6.44915	7.27237	60.2959	52.2972	64.0606	62.0158
CG31708	0.664884	0.697245	0.573578	0	0	0	0	0.52703	0.603268	0.579636	0.426938	0	0	0
CG31710	13.6439	8.39742	11.5679	46.2063	35.3703	75.8237	74.8626	12.6867	6.56712	7.82471	33.9151	43.3896	52.8407	24.7328
CG31728	4.9494	4.67158	5.31253	2.17222	1.19913	1.22494	1.90067	0.278529	0.801606	0.509696	0.354564	0.425264	0.630227	0.365037
CG31730	0	0	0.117725	0.874307	0.746828	0.439245	0	0	0	0	1.05062	0	0	0.757157
CG31743	551.101	565.288	576.433	1258.81	1028.08	724.769	693.277	347.112	355.997	338.836	736.681	603.578	633.662	758.363
CG31777	45.2409	36.1373	35.8682	34.8246	31.449	25.46	17.8279	14.8857	15.0334	17.0488	95.6352	31.3218	24.1504	41.876
CG31778	64.6651	59.7442	75.9118	4.44352	2.37227	8.02267	3.81028	3.32604	3.43621	4.73394	2.60554	2.18755	0	2.05379
CG31784	0	0	0	0	0	0	0	0	0	0	0	0	0	0
CG31787	0	0	0	0	0	0	0	0	0	0	0	0	0	0
CG31788	0	0	0	0	0	0	0	0	0	0.313922	0	0	0	0
CG31789	0	0	0	0	0	0	0	0	0	0	0	0	0	0
CG31798	0	0	0.038842	0	0	0	0	0.156643	0.131488	0.111474	0	0	0	0.179632
CG31803	0.370232	0.440017	0.339349	0	0	0	0	0	0.0767015	0.0650268	0.232637	0	0	0
CG31807	0	0	0	1.09654	0	0	0	0	0	0	0	0	0	0
CG31812	1.78601	4.85179	4.33813	5.10623	1.55776	3.97017	4.17005	1.65419	3.4251	3.53162	4.77308	0.707183	3.29933	7.71436
CG31816	0	0	0	0	0	0	0	0.533019	0.223712	0	0	0	0	0.305623
CG31819	0	0	0	0	0	0	0	0	0	0	0	0	0	0
CG31827	0	0	0.194606	0	0	0	0	0.925769	1.41292	1.49732	0.214271	0	0	0
CG31835	0	0.0506118	0.163938	0	0	0	0	0	0	0.0530829	0	0	0	0
CG31848	0	0.166637	0	0	0	0	0	0	0	0	0	0	0	0
CG31849	1.32447	1.55961	1.6056	5.70039	0.496864	2.11865	1.7956	0.156963	0.527027	0.521277	2.46434	1.56574	2.67026	3.71998
CG31851	0	0	0.0934875	0	0	0	0	0	0	0	0	0	0	0
CG31855	29.2062	30.3035	33.2438	46.5194	20.7194	38.8429	24.0678	41.2201	41.9584	39.7867	76.5981	33.421	47.1107	76.3379
CG31862	0	0	0	0	0	0	0	0	0.118654	0	0	0	0	0
CG31867	0	0	0	0	0	0	0	0	0	0	0	0	0	0
CG31869	22.0656	23.2331	21.8695	42.3271	142.629	160.585	213.144	19.7059	23.4889	25.1726	9.2398	6.10774	8.2076	10.8471
CG31870	0	0	0.24141	1.79287	0	0	0	0	0	0	0	0	0	0
CG31871	146.276	172.61	151.35	3.25419	4.17718	5.15926	3.5681	233.396	250.032	254.15	5.27487	2.26583	4.32455	1.82338
CG31875	2.58472	1.75538	3.19831	12.4922	4.5088	6.18761	2.41396	0	0	0	0.217128	0	0	0.391198
CG31908	49.5228	60.245	61.1065	61.2798	42.6949	45.7441	43.1281	44.1356	49.6098	51.825	68.4745	58.9638	54.0071	69.5932
CG31910	0	0.0674178	0	0.10812	0.923559	0	0	0.097652	0	0.0694939	0.62155	0	0	0.335952
CG31913	0.580661	0	0.177409	0	0	0.165483	0	0	0	0.256443	0	0	0	0
CG31917	50.7085	52.2887	58.8563	81.0428	58.7571	31.8088	49.5463	79.8249	72.0175	63.3619	127.672	101.721	81.3473	102.103
CG31918	0.330795	0.224655	0.0909609	4.72875	0	1.13128	0	0.728548	0.683502	0.85395	1.58209	1.4657	0.452524	0.933764
CG3192	297.005	301.491	329.227	567.682	371.255	333.424	270.389	213.796	226.119	251.242	695.559	378.108	428.007	551.05
CG31922	7.48453	8.64117	6.17422	6.92902	8.70404	5.11925	3.14553	1.68076	2.35143	3.18963	6.89422	3.99189	5.25853	11.9929
CG31928	0	0.0422572	0	0.338845	0.578881	9.53307	0	0	0.0512562	0	0	0	0	0
CG31933	0	0	0	0	0	0	0	0	0	0	0	0	0	0
CG31937	106.304	129.698	128.984	148.344	96.8643	66.2807	72.1906	84.51	88.4559	85.9734	92.8224	56.0562	54.3128	74.9083
CG31949	0	0	0	0	0	0	0	0	0	0	0	0	0	0
CG31950	8.25399	9.48865	11.9787	11.0033	7.66579	7.93907	8.02993	19.9227	18.8358	17.6105	40.3111	30.9307	12.5483	38.719
CG31957	14.1331	16.8859	17.5121	37.4137	18.262	15.6637	14.666	37.5778	28.4562	23.5559	35.0119	26.3191	41.6492	37.4083
CG31960	0	0.119348	0	0	0	0	0.32825	0	0	0.138988	0	0	0	0
CG31961	27.6645	25.127	24.6585	50.8298	36.1255	35.2781	29.4224	43.4583	37.508	36.5175	69.9092	71.7888	65.827	102.317
CG31974	3.32509	3.37874	4.47924	2.88076	0.488241	3.96277	2.94075	1.24198	1.19892	1.8561	4.82215	1.85837	2.07645	8.11831
CG31975	0.0500168	0.0424604	0.0458447	0	0	0	0	0	0	0	0.0796314	0	0	0
CG31976	0	0	0.098306	0	0	0	0	0	0	0	0	0	0	0
CG3198	39.7138	42.6667	46.5029	69.3959	482.471	673.316	908.177	17.5404	17.567	18.2505	29.4894	155.016	147.319	56.8069
CG3199	0	0	0	0	0	0	0	0	0	0	0	0	0	0
CG31997	943.906	1152.42	1156.65	909.541	953.719	691.142	654.532	2040.36	2489.32	2653.35	1159.05	877.492	779.679	1247.79
CG31998	23.4739	35.436	40.4826	34.6764	32.2575	44.1869	30.3674	64.9346	75.3871	72.9864	84.0602	167.104	154.75	219.728
CG31999	45.6075	63.5463	66.4898	91.8405	99.7003	153.683	83.8646	27.9185	28.9813	33.2737	47.2433	88.2834	65.6591	96.4993
CG32017	40.4484	72.8896	65.5629	29.9143	36.6473	46.1343	27.415	14.9944	14.5229	15.4465	21.2901	43.9305	33.0316	57.4772
CG32023	0	0	0	0	0	0	0	0	0	0	0	0	0	0
CG32032	54.8548	53.423	51.9462	229.393	134.664	103.377	132.154	21.6837	17.2115	16.0122	171.971	119.656	119.112	163.45
CG32036	0	0.204202	0.220478	1.47368	0	1.43961	0.56163	2.59088	0.951481	1.84379	13.1926	0	0.284975	2.59974
CG32037	12.0549	7.92055	12.9413	0.224821	1.12024	1.55305	0.578346	0.203864	0.085563	0	1.94637	0	1.25571	0.467567
CG32039	68.5108	56.4371	60.4703	82.2188	120.003	71.1576	55.6905	52.1174	42.9527	48.1036	58.7051	27.682	31.1293	17.3866
CG32055	0.194822	0.496167	0.571428	1.00791	1.66148	0.799524	0.363903	0	0.0402933	0.0341603	0.122211	0.307817	0	0.110093
CG32061	0.291687	0	0	0	0	0	0	0	0	0	0	1.27778	0	0
CG32068	193.863	162.675	171.745	219.31	145.487	155.514	123.542	43.2779	36.3281	41.1253	65.9487	40.8126	35.6178	40.1416
CG32079	0	0	0	0	0	0	0	0	0	0	0	0	0	0
CG32091	34.567	40.5439	34.2245	122.585	643.317	704.438	904.404	43.6905	37.292	34.728	58.2709	48.4861	52.2908	153.401
CG32100	11.5357	8.95869	9.67275	15.996	5.21706	12.0544	8.87827	4.38749	3.2392	3.6114	6.66189	2.25987	4.00026	7.57744
CG3213	0	0.0261295	0	0	0	0	0	0	0	0.134273	0	0	0	0
CG32138	91.7233	101.039	100.806	115.154	543.432	644.839	1000.94	96.9358	107.072	106.866	80.9121	219.034	252.743	134.207
CG32141	0.349698	0.222649	0.0801319	0.357069	0	0.747453	1.02061	0.100333	0	0.0714018	0	2.14466	2.11888	0.230117
CG32148	0	0	0	0	0	0	0	0	0	0	0	0	0	0
CG3216	0.232981	0.562919	0.443521	0.390387	0.0694724	0.429029	0.460286	0	0	0.0157096	0.365316	0.330304	0.116548	0.58224
CG32170	114.516	109.677	118.419	120.916	94.4737	87.4974	78.7193	110.288	91.2747	90.234	61.7259	37.1965	39.4806	47.7851
CG32202	23.3156	13.1537	16.772	37.7699	24.3117	36.5882	23.0846	4.26415	3.57939	4.35395	12.2725	6.73704	8.80947	13.1816
CG3222	0.274499	0.233028	0	0.0747426	0	0	0	0.135012	0	0.144122	0	0.577191	0	0
CG32225	12.978	14.7895	13.8349	21.6057	12.9873	16.1612	16.3034	6.78783	6.1361	6.99811	27.4734	22.508	18.5312	27.843
CG3223	20.5563	21.0685	24.1265	40.6141	16.9089	15.8604	17.2082	33.9278	37.8689	37.2065	50.8206	39.2333	34.259	52.7267
CG32230	824.763	663.765	620.854	1905.11	1927.03	1489.16	785.492	589.077	501.289	601.07	2141.63	981.064	825.846	1918.9
CG32236	0	0	0	0	0	0	0.378554	0	0	0	0.0802198	0.269404	0.776314	0
CG32238	0.128175	0.217621	0.0783223	1.27968	0.745294	0.803628	0.199512	0.0529708	0	0.11309	1.14633	0.90582	0	0.24298
CG3224	54.201	58.2245	61.6878	65.5728	40.5777	30.7471	51.8798	59.2744	57.4926	60.0507	86.9862	66.2381	62.3655	111.163
CG32240	0	0	0	0.586085	0	0	0.670084	0	0	0	0	0	0	0
CG3225	2.94612	3.17839	2.64412	7.26988	4.5801	5.09018	2.86614	1.54946	1.58614	1.37161	3.60811	3.39282	2.59383	3.77041
CG3226	81.8708	61.7457	82.1728	128.705	73.4684	63.7324	73.2942	98.0012	75.6339	73.2257	112.294	103.671	89.2694	151.93
CG32260	2.31591	1.78171	2.1559	3.59635	4.13808	3.15568	2.45018	1.34658	1.02095	1.51471	3.31776	4.17827	3.66937	2.54046
CG32266	0	0	0	0	0	0	0	0	0.278913	0	0	0	5.84755	0
CG32267	19.9577	29.1989	31.5262	57.233	18.9299	20.3307	25.7778	26.1179	20.5815	23.518	35.2834	14.8116	0	17.7262
CG32276	418.091	300.28	288.157	298.324	115.315	155.101	122.971	210.977	60.1337	75.6312	130.277	5.0482	0	48.2979
CG32295	0	0.0493395	0	0.158254	0.6759	0.596292	0.271403	0.13609	0	0	0	0.145449	0	0.156063
CG32298	0	0	0	0	0	0	0	0	0	0	0	0	0	0
CG32299	0	0	0	0	0	0	0.72509	0	0	0	0	0	0	0
CG32302	0	0	0	0	0	0	0	0	0.0677484	0	0	0	0	0
CG32319	0	0	0	0.134253	0	0	0	0	0	0	0	0	0	0
CG32335	0.129236	0.164567	0.177684	5.10246	0.375733	1.43642	1.50873	0.158584	0	0	2.32157	1.86439	0	1.00022
CG32354	3.20591	3.70881	3.97561	23.5777	118.184	148.71	212.744	3.6223	2.33647	3.79887	27.9095	200.988	228.889	43.813
CG32364	12.2128	15.8204	13.7646	8.86774	11.5726	10.3642	13.9407	0	0	0	0	0	0	0
CG3238	2.73033	3.94299	4.45862	20.2949	0.304139	3.81009	2.34479	0.694613	0.809815	0.604167	1.76846	0.989844	1.42617	2.30117
CG32395	0	0	0	0	0	0	0	0	0.0575773	0.0488136	0	0	0	0
CG32425	35.0685	37.7558	41.9571	78.9038	41.4209	70.5646	53.2368	12.0966	14.1528	12.4938	47.7637	50.5701	38.715	49.2271
CG32428	43.1877	46.608	50.2427	83.7921	358.892	441.745	512.755	114.183	114.134	112.743	82.2054	66.8685	68.424	112.747
CG32441	146.108	172.433	161.057	248.333	190.984	137.77	147.456	105.751	100.605	101.557	116.525	107.433	122.671	158.957
CG32448	52.6295	46.3408	40.3865	76.3175	81.1319	75.7619	50.2957	17.0566	25.567	21.242	51.568	33.855	50.3865	49.249
CG32459	0.351668	0.0995126	0.107444	0.239387	0.568011	1.50333	0.136848	0	0	0.0508588	1.00073	1.37486	0	0.327819
CG32462	0.146528	0	0.0671529	0.299234	0.142003	0.626387	0.342121	0	0	0.0625688	0.111922	0	0	0
CG32486	86.0561	87.8891	97.4862	167.833	106.793	171.849	137.843	130.13	132.614	152.925	208.331	407.876	348.233	239.344
CG3251	0	0	0	0	0	0	0	0	0	0	0	0	0	0
CG32512	41.8049	44.0778	51.834	39.7624	160.852	314.905	293.604	24.2322	27.4502	28.5878	18.4933	353.152	324.189	38.243
CG32521	558.786	656.919	651.773	697.6	689.746	826.29	659.35	832.32	920.149	918.759	839.516	742.474	775.279	788.238
CG32523	769.146	666.696	604.823	0	0	0.543188	0.370848	9095.43	9824.52	9744.52	0.512901	0	0	0
CG3253	1.71163	2.22497	1.86302	3.7867	1.96979	4.48165	3.37195	0.846321	1.31153	1.15823	4.06079	7.09703	5.27024	5.00196
CG32551	145.049	121.437	100.125	1933.62	2439.89	1640.39	1447.62	427.74	418.476	378.644	3643.33	2763.65	2734.35	3151.61
CG32554	6.7906	5.24732	3.83024	7.1115	5.39966	5.35915	4.87844	3.59086	3.01422	2.87486	3.99974	0	1.38238	6.43418
CG32564	0	0.129561	0.0932586	0.277041	1.57765	0.608928	0.47512	0.821245	0.583308	0.674351	1.28668	0	0.555879	1.66621
CG3257	15.6867	24.0256	21.8873	15.9698	12.9919	17.2721	14.0201	10.1332	11.4666	9.72125	15.18	16.275	21.0844	27.9275
CG32573	3.23782	3.87516	4.91381	1.51754	1.54319	0.907622	0.991451	3.84404	4.91946	4.52944	3.77033	5.11867	2.55074	4.8418
CG32579	22.8759	25.0902	28.282	35.6508	32.5379	43.0584	32.5714	6.57898	5.15432	5.46224	5.67635	9.53149	11.3209	14.2508
CG32590	12.5069	13.7061	12.089	21.9809	3.74639	14.5815	14.8664	18.4155	13.3342	12.9053	38.8326	90.447	67.0445	59.647
CG32591	0.318475	0.18024	0.437864	0.505847	1.54319	1.63372	0.743588	29.4259	37.9251	37.8511	111.465	239.769	251.94	228.597
CG3262	59.2964	65.5297	66.7827	70.867	34.4102	51.2432	44.7675	78.682	82.1541	77.3196	122.135	117.806	115.033	154.436
CG32631	0	0	0	0	0	0	0	0	0	0	0	0	0	0
CG32638	140.545	167.748	139.377	106.005	108.811	127.323	106.634	139.098	144.626	140.359	129.658	195.91	208.032	178.453
CG32639	1.46528	2.86099	2.01459	1.39642	11.3602	8.76942	22.58	0.540526	0	0.384664	0.229361	14.2499	7.29297	0
CG32641	435.528	306.301	304.564	263.746	176.896	131.264	166.722	244.884	169.765	172.248	472.771	421.451	347.345	621.027
CG32643	0	0	0	0	0	0	0	0	0	0.158326	0	0	0	0
CG32649	60.5953	71.028	67.6587	110.353	85.9655	135.533	77.5386	23.2238	27.3896	27.7381	48.5336	21.0978	22.0023	28.7629
CG32655	0	0	0	0	0	0	0	0	0	0	0	0	0	0
CG32668	7.04016	8.84201	8.30922	18.1847	11.7762	16.6145	17.7887	6.67302	6.75686	5.81362	27.9982	23.9224	26.1204	43.0318
CG32669	0.861217	0.818837	1.19986	1.54769	8.68002	8.36454	12.3866	0.513409	0.574618	0.517603	1.1982	4.847	7.83064	2.0116
CG32687	14.2945	15.9768	18.9702	10.0686	7.70204	11.5135	7.08742	125.297	138.145	135.178	66.9871	151.06	125.343	79.6141
CG32694	80.0681	106.234	104.483	118.748	181.652	318.68	203.93	31.5137	34.8165	29.7797	40.8681	65.7845	56.8889	59.8364
CG32695	3.42394	2.45948	4.82821	0	0	0	0	2.65817	1.11565	2.3646	0.845955	0	0	0
CG3270	0.520175	0.160577	0.0866881	0.579425	0	1.53635	0.552058	3.14712	3.62016	3.94011	3.26435	1.61949	4.20518	2.53967
CG32712	0	0.193044	0.104215	0.154795	0	0	0	0.285864	0.11998	0	0.363902	0	0	0
CG32720	0.371554	0.47313	0.340561	0	0	0	0	0	0	0	0	0	0	0
CG32795	141.671	172.619	163.66	121.068	285.844	481.463	245.04	232.319	284.701	264.433	110.111	109.661	132.746	144.267
CG3281	14.4257	12.7388	13.5059	26.8006	9.2951	14.4167	11.468	6.86076	6.35892	6.17085	8.61235	9.16573	12.2418	13.987
CG32815	10.7848	12.5772	13.6296	38.9317	37.056	53.1819	39.6788	12.1511	10.1998	8.93556	55.1701	317.023	300.332	127.811
CG32816	39.4122	41.2149	42.5827	5.32076	4.26759	3.76495	3.85564	2.69315	1.0173	1.19786	11.3135	10.0743	14.4558	17.6811
CG32832	0	0	0	0.202339	0	0	0.347007	0.184064	0	0	0.234311	0	0	0
CG32846	0.0584467	0	0	0	0	0	0	0	0	0	0	0	0	0
CG32850	82.0955	105.02	114.817	93.269	112.481	144.736	91.544	79.3475	100.997	97.3114	110.691	145.221	154.245	217.076
CG32856	20.0292	12.546	16.5761	23.8269	19.599	8.64531	12.2588	1.19555	2.60927	2.55245	9.74034	9.20001	8.41611	6.5809
CG3294	8.62396	8.48316	9.53572	9.93945	7.95962	9.51889	8.41646	1.97676	1.75414	2.17043	3.09156	5.79485	3.28006	3.49747
CG32945	0	0	0	0	0	0	0	0	0.130953	0.222042	0	0	0	0
CG3295	42.481	42.646	48.12	72.2613	45.5565	41.1791	43.2957	29.012	38.1416	36.9615	45.8828	22.6081	22.4611	46.2797
CG3301	96.5447	108.878	106.571	254.267	211.645	214.469	162.456	13.7686	29.1526	31.9545	23.2824	23.5009	19.7103	20.0312
CG3303	278.375	382.454	330.255	62.7251	27.4285	20.5518	31.3816	30.4662	34.6871	35.6962	11.9992	11.6933	13.182	12.8362
CG33051	16.1723	13.9801	14.0098	25.5081	15.6728	22.595	12.2028	3.39515	2.34102	2.07099	6.17427	8.29405	3.6277	2.64198
CG33052	15.3898	16.2525	18.1122	27.4893	12.6474	11.4736	16.9603	15.5037	13.7833	14.1311	19.736	16.8149	12.0966	21.0196
CG33056	73.3403	80.5414	90.2972	508.655	339.913	406.614	337.518	83.1138	75.293	80.3364	271.887	240.663	233.689	286.364
CG3306	62.5652	51.8866	51.5193	0	0	0	0	43.3792	34.3324	38.2419	0	0	0	0
CG33060	0	0	0	0	0	0	0	0	0	0	0	0	0	0
CG33080	197.52	216.545	206.94	46.7021	29.3419	29.1939	37.5519	416.498	445.873	407.681	59.5159	67.0993	69.4704	94.0084
CG3309	8.99231	9.05466	10.8593	17.1573	7.12432	5.38733	6.58987	12.8942	16.1841	14.2128	19.4691	13.7374	14.4599	17.9118
CG33098	0	0	0	385.623	371.901	511.561	320.847	0	0	0	681.329	1171.49	1008.86	1023.39
CG33107	8.36573	8.25514	10.0272	19.2743	9.2853	9.90337	9.18199	9.18654	11.1706	10.8756	27.5418	46.7976	37.7736	33.9673
CG33109	0.492057	0.537065	1.09531	0.574206	0	0	0.492376	1.03141	0.432893	0.795176	2.40714	1.83725	1.36138	3.25268
CG33110	28.9569	35.1174	37.1808	432.645	413.579	564.826	418.346	331.754	302.81	272.507	465.12	638.753	564.119	751.49
CG33129	70.381	76.3419	82.0326	89.6692	43.1881	54.9185	40.544	139.982	125.79	125.602	97.1802	90.3696	76.8562	122.847
CG3313	9.74623	9.50518	9.97198	24.6245	12.74	8.68153	9.20818	10.1111	11.5353	10.5349	14.0802	18.7471	15.3364	18.962
CG33136	0.115594	0	0	0.157375	0	0.9883	4.04843	0	0	0	0	0	0	0
[truncated: 4,561 more rows]
