# Supplementary material for: Sugar sensation and mechanosensation in the egg-laying preference shift of Drosophila suzukii
Source: eLife. 2022 Nov 18;11:e81703. doi: 10.7554/eLife.81703 (PMC9674340; doi:10.7554/eLife.81703)
Supplement: Supplementary file 3. [file elife-81703-supp3.xlsx]

## Sheet: DESeq2 Leg RNAseq
	baseMean	log2FoldChange	lfcSE	pvalue	padj
140up	175.459	-0.642132	0.277632	0.00902729	0.0249567
26-29-p	3925.58	-0.182195	0.266325	0.446555	0.567753
7B2	540.305	-0.352582	0.201672	0.0630641	0.125909
AANATL2	10.0263	-0.335748	0.740939	0.360278	0.482143
ACC	5741.58	-0.0595997	0.194209	0.745646	0.818341
AGBE	1933.14	0.449624	0.192385	0.0133914	0.0348056
AGO1	8907.6	-2.44538	0.683378	5.14799e-06	3.55611e-05
ALiX	3191.51	0.475502	0.12969	0.000168466	0.000792772
AMPdeam	3701.2	-0.442681	0.228803	0.0360617	0.0796591
AP-1-2beta	2157.46	0.144507	0.17002	0.375209	0.496946
AP-1gamma	5485.42	0.679331	0.518987	0.0592041	0.120152
AP-1mu	409.385	-5.41752	0.589628	5.81322e-21	2.70603e-19
AP-2alpha	1851.83	0.715703	0.166602	6.88809e-06	4.62478e-05
AP-2mu	958.53	0.212017	0.211549	0.284088	0.40455
AP-2sigma	335.509	0.285985	0.279054	0.248788	0.367281
APC4	207.855	0.150299	0.208725	0.442452	0.563369
APP-BP1	274.888	0.434571	0.240057	0.048021	0.100946
AQP	816.574	-0.00419736	0.284706	0.986707	0.990084
ATP7	1130.27	0.479038	0.148853	0.000869999	0.00332491
ATPCL	6911.43	0.799018	0.130216	2.65818e-10	4.08774e-09
ATPsyn-Cf6	2963.19	-0.101717	0.265251	0.66997	0.757166
ATPsyn-beta	50487.1	0.670441	0.233933	0.00175745	0.00613302
ATPsyn-d	5438.79	0.215511	0.250302	0.344194	0.465198
ATbp	97.3439	-0.534314	0.267854	0.0257667	0.0600797
Aatf	207.051	-0.419518	0.279319	0.0905517	0.167779
Aats-ala	1284.74	0.164785	0.149825	0.255719	0.374519
Aats-ala-m	482.997	-0.202694	0.173449	0.22186	0.337858
Aats-arg	495.367	0.379051	0.233289	0.0776059	0.148131
Aats-asn	844.309	0.221704	0.180144	0.196642	0.308642
Aats-asp	1095.15	0.608817	0.167212	0.000140844	0.000672437
Aats-gln	643.352	-0.36363	0.261095	0.122384	0.21349
Aats-gly	544.007	-0.495151	0.210231	0.0116806	0.0309982
Aats-his	4103.42	1.45451	0.643426	0.00094229	0.0035669
Aats-leu	302.142	-0.766517	0.182801	9.25233e-06	6.02456e-05
Aats-lys	1078.05	0.0768979	0.261831	0.744821	0.81794
Aats-pro	72.3604	-0.814112	0.329702	0.00345684	0.0109513
Aats-tyr	556.912	-0.348835	0.271024	0.150088	0.250244
Aats-tyr-m	174.251	-0.422779	0.224407	0.0419054	0.0902941
Aats-val	1201.34	0.715797	0.168259	8.29528e-06	5.46009e-05
Ac13E	8493.92	-4.33855	0.598104	7.17239e-14	1.72371e-12
Ac3	178.502	-0.563691	0.317705	0.0381433	0.0832104
Acam	0	0	1.84404	NA	NA
Ace	994.623	-0.707507	0.271103	0.0033482	0.0106725
Acer	3089.35	4.236	0.303328	6.29743e-45	7.9363e-43
Ack	846.287	-0.59254	0.218102	0.00340646	0.0108049
Acn	2370.21	0.234689	0.294827	0.363706	0.485725
Acp26Ab	0	0	1.84404	NA	NA
Acp32CD	0	0	1.84404	NA	NA
Acp53C14b	0	0	1.84404	NA	NA
Acsl	9944.3	1.38791	0.175964	8.96804e-17	2.95146e-15
Act42A	970.209	0.557865	0.261273	0.0175565	0.0438235
Act57B	12573.7	1.67954	0.297034	2.87105e-10	4.38897e-09
Act5C	13751.9	-0.0320476	0.148105	0.823225	0.877937
Act79B	57539.3	0.849724	0.289286	0.000779347	0.00302774
Act87E	18453.3	0.180198	0.249495	0.427866	0.54981
Act88F	526.347	-0.248859	0.645758	0.482315	0.600078
Actn	16603	0.823296	0.143365	2.67628e-09	3.34018e-08
AdSL	343.859	0.764906	0.260187	0.00103866	0.00390024
AdSS	3333.77	-0.0463178	0.190752	0.797837	0.859554
Ada	27.6184	-1.64582	0.773391	0.00100086	0.00377201
Ada2a	95.897	-2.30895	0.446647	3.87915e-09	4.73844e-08
Adam	1165.52	0.215827	0.145515	0.126014	0.218274
AdenoK	513.596	-0.081735	0.164855	0.605934	0.708425
Adgf-A	123.997	1.29313	0.277657	1.43292e-07	1.34372e-06
Adgf-D	64.3438	0.723613	0.449193	0.0317648	0.0716093
Adgf-E	0	0	1.84404	NA	NA
Adh	16256.3	-1.13496	0.312522	2.31975e-05	0.000136516
Adhr	69.8289	-3.77236	0.65872	8.92031e-10	1.24571e-08
AdipoR	3286.18	-0.0636648	0.179035	0.709372	0.791135
Adk3	355.77	-0.0670015	0.223939	0.747238	0.819567
Ady43A	455.502	0.730466	0.174484	1.06891e-05	6.89518e-05
Afti	626.531	0.376596	0.228487	0.0744198	0.143588
Ahcy13	597.596	-1.14513	0.224407	2.5579e-08	2.71948e-07
Ak6	109.688	0.491343	0.320529	0.0726469	0.140929
Akh	1.81322	-0.748555	1.334	0.113776	0.201535
AkhR	42.1347	-0.198007	0.332138	0.480295	0.598243
Ald	42797.3	0.487054	0.224887	0.0192073	0.0472367
Aldh	6680.82	-2.20879	0.233418	6.14312e-23	3.73429e-21
Alg10	185.373	-0.124285	0.280905	0.618218	0.717182
Alk	1515.46	-0.293463	0.340225	0.303042	0.42308
AlkB	126.569	0.416367	0.245003	0.0625208	0.125163
Als2	1525.9	0.283672	0.197864	0.128528	0.221738
Amph	3531.31	0.614663	0.235962	0.00444668	0.0136194
Amun	16776.4	-0.0658128	0.599785	0.848092	0.895217
Amy-p	26.9322	0.933689	0.994058	NA	NA
Amyrel	2.41626	-1.06259	1.67336	0.0564429	0.115593
Andorra	0	0	1.84404	NA	NA
AnxB10	3677.39	-0.157365	0.148059	0.27244	0.392447
AnxB9	6913.77	-0.161635	0.133206	0.213049	0.327627
Aos1	332.414	-0.526938	0.279358	0.0332941	0.0746012
Aph-4	1637.42	1.82507	0.180499	8.92403e-26	6.14806e-24
Aplip1	420.294	0.607583	0.209136	0.0018476	0.00640185
Aprt	66.7594	0.355429	0.392856	0.25181	0.370367
Aps	860.874	-0.601839	0.216754	0.00278356	0.00912025
Arc1	7737.55	1.79596	0.326165	6.16344e-10	8.83539e-09
Arc2	200.486	0.783538	0.262054	0.00083198	0.00320685
Arc42	686.242	-0.649758	0.153508	1.09788e-05	7.04689e-05
Arf102F	1510.13	0.909273	0.194674	6.09473e-07	5.07109e-06
Arf51F	831.65	0.173902	0.14364	0.212121	0.32649
Arf79F	3037.9	0.773923	0.178334	4.70481e-06	3.294e-05
ArfGAP1	470.275	-0.322717	0.200149	0.086854	0.162071
ArfGAP3	1026.47	-0.229305	0.19069	0.204405	0.317402
Arfip	281.527	0.537805	0.220154	0.00842733	0.0235373
Arfrp1	130.31	0.199314	0.237363	0.360983	0.482961
Arl2	196.347	0.625632	0.212646	0.00156901	0.00560266
Arl6	89.6944	0.351016	0.26346	0.138732	0.234641
Arp1	1555.23	0.853202	0.118088	1.3104e-13	3.07766e-12
Arp3	796.926	0.103067	0.143188	0.458322	0.578597
Arp5	231.111	0.11502	0.224952	0.581495	0.688967
Arp53D	0	0	1.84404	NA	NA
Arp6	287.45	-1.63123	0.279746	1.06032e-10	1.75599e-09
Arp8	169.944	-0.740961	0.388649	0.0169575	0.0426372
Arpc2	671.834	0.14224	0.273723	0.560753	0.670542
Arpc3A	208.677	0.374772	0.197499	0.0441433	0.0941735
Arpc3B	21.4968	0.0163691	0.481582	0.960857	0.97348
Arpc4	545.043	0.691152	0.250785	0.00230551	0.00779108
Arpc5	225.783	0.0131419	0.223708	0.949554	0.965202
Arr1	43.3425	-6.92794	1.01543	1.9888e-13	4.58756e-12
Arr2	6.12509	-2.64856	1.84032	0.00302425	0.00976643
Ars2	3246.56	0.270623	0.288873	0.287616	0.408199
Art1	429.613	0.0533429	0.308559	0.841635	0.890951
Art2	6.68824	0.15843	0.65698	0.648948	0.740558
Art4	128.627	-0.665787	0.503775	0.0607034	0.122378
Art7	258.3	0.556604	0.232023	0.00906835	0.0250434
Art8	57.8553	-0.979074	0.390425	0.00174407	0.00610128
Asap	1708.03	0.226428	0.208681	0.246999	0.365058
AstA	5.75011	-0.584427	0.932591	0.159781	0.262342
AstA-R1	75.6991	-1.00517	0.545039	0.0082586	0.0231537
AstC	0.142312	-0.118432	1.11177	0.728799	NA
AstC-R1	4.61675	-0.203028	0.735229	0.564766	0.673816
AstCC	0	0	1.84404	NA	NA
Asx	1042.67	-0.122089	0.192968	0.503905	0.62007
Atac1	70.5042	-1.29933	0.530706	0.000775982	0.00301693
Atac2	189.641	0.254446	0.266356	0.287643	0.408199
Atet	1854.15	-0.7283	0.176059	1.33593e-05	8.39748e-05
Atf-2	154.096	-1.60033	0.313682	6.96232e-09	8.15744e-08
Atg12	88.7868	-1.43391	0.553728	0.00037018	0.00158338
Atg16	277.375	-0.673958	0.234168	0.00167542	0.0059051
Atg17	2207.84	0.765684	0.266309	0.00126703	0.00464968
Atg18a	627.104	0.147766	0.172851	0.371744	0.494034
Atg2	1733.74	-0.194828	0.14863	0.175748	0.283062
Atg3	576.875	0.120239	0.145691	0.394635	0.516092
Atg4b	330.957	-1.28521	0.182758	8.50529e-14	2.0252e-12
Atg5	365.744	-0.99901	0.374235	0.00102439	0.00385506
Atg6	457.171	0.0183995	0.138258	0.891169	0.92499
Atg8a	6102.38	0.302027	0.254933	0.191213	0.302483
Atg8b	0	0	1.84404	NA	NA
Atg9	745.832	-0.0324575	0.194987	0.860271	0.902664
Atox1	240.894	0.301831	0.321526	0.271587	0.391761
AttC	96.0613	1.12237	0.384354	0.000307594	0.00135957
Atxn7	375.674	0.101875	0.264695	0.668977	0.756997
Aven	89.9436	-0.120643	0.369659	0.686814	0.771304
Axs	675.078	1.08639	0.173413	3.63063e-11	6.42447e-10
Axud1	818.871	-0.31331	0.267937	0.192303	0.303677
BBS8	220.82	-0.23644	0.27695	0.337698	0.458962
BCAS2	188.778	0.449715	0.289544	0.0773034	0.147744
BCL7-like	80.0123	-0.571336	0.445166	0.0861432	0.161125
BEAF-32	350.471	-0.593644	0.216491	0.0031512	0.0101321
BG642167	0	0	1.84404	NA	NA
BHD	133.02	-0.0724555	0.273655	0.766973	0.83536
BI-1	3406.17	1.19993	0.462675	0.000664262	0.00264038
BM-40-SPARC	3072.65	0.483079	0.195961	0.00891378	0.0246957
BRWD3	2027.04	-0.36298	0.180079	0.0343106	0.0764151
Bace	161.572	-8.04196	2.75176	6.1489e-06	4.18044e-05
Bap170	774.531	-1.13371	0.281702	4.67604e-06	3.28776e-05
Bdbt	157.969	-0.694626	0.304646	0.00836587	0.0234163
Bem46	191.878	0.301383	0.224176	0.1471	0.245967
Bet1	357.892	0.691801	0.181058	5.56026e-05	0.000292267
BicC	2340.6	-3.78928	1.35959	9.3392e-05	0.00046987
BigH1	226.377	-2.87971	1.93568	0.00240578	0.00808237
Bin1	154.002	0.00610871	0.307516	0.981702	0.987622
Bka	110.007	-0.414708	0.304795	0.11672	0.205833
Blos1	99.5797	-0.967518	0.404705	0.00249463	0.00833211
Blos2	144.586	-0.229328	0.230424	0.281264	0.401684
Blos4	43.669	-0.395151	0.389742	0.201055	0.313568
BobA	0.0711558	-0.0734839	1.09936	0.828194	NA
Brd	0.996181	-0.392537	1.28297	0.305234	0.42494
Brms1	366.308	-0.209278	0.17081	0.200881	0.313486
Bro	5.40784	-0.876555	1.74274	NA	NA
Bsg25A	27.8931	-21.0595	3.30982	NA	NA
Bsg25D	1072.12	0.00698641	0.27036	0.976993	0.984999
Btd	5.06418	-1.35192	1.22545	0.0183499	0.0455399
Bteb2	0	0	1.84404	NA	NA
Bub3	353.922	-0.0556755	0.237542	0.798796	0.860185
Buffy	421.995	0.148533	0.264715	0.533018	0.645291
Bug22	241.336	-0.267601	0.201835	0.158872	0.261514
Burs	0	0	1.84404	NA	NA
Bx42	913.151	0.21922	0.181409	0.204557	0.317402
Bzd	425.927	1.01119	0.218792	5.09789e-07	4.29003e-06
C1GalTA	518.697	1.13371	0.266548	1.71592e-06	1.30577e-05
C901	5.79124	1.2807	1.06587	0.0166706	0.042018
CAH1	862.039	-1.50775	0.261026	1.79152e-10	2.83082e-09
CCAP	0.547141	-0.268715	1.18757	0.455706	NA
CCHa1	168.284	-2.11098	0.379873	4.40839e-10	6.54544e-09
CCHa2	8.36816	-0.0915262	0.792168	NA	NA
CDC45L	207.554	-0.277035	0.325224	0.31667	0.436678
CG10005	2.79136	0.649061	1.05015	0.136928	0.232426
CG10014	1.39781	-0.25483	0.985866	0.48447	0.6016
CG10026	559.087	1.35695	0.294261	1.46931e-07	1.37286e-06
CG10029	0	0	1.84404	NA	NA
CG10031	900.845	1.40836	0.213068	1.09708e-12	2.32321e-11
CG10035	118.611	-0.171207	0.612473	NA	NA
CG10050	30.5287	0.0358418	0.399405	0.908347	0.934946
CG10051	3.34694	0.189642	0.766736	0.590038	0.695104
CG10053	95.9672	0.109526	0.2968	0.673228	0.759845
CG10063	2.81317	0.216206	0.727364	0.540998	0.652354
CG10068	371.458	0.209175	0.207797	0.283128	0.403676
CG10075	418.674	-0.337836	0.250218	0.137681	0.233305
CG10077	7501.02	-0.138259	0.280571	0.578944	0.686732
CG10098	495.766	0.202092	0.179528	0.237795	0.355626
CG10104	0	0	1.84404	NA	NA
CG10116	1.65973	-0.364444	1.01758	0.341438	0.462562
CG10126	1554.32	-1.40361	0.2064	2.99423e-13	6.64e-12
CG10131	145.026	-1.68824	0.502724	1.66815e-05	0.000101883
CG10133	107.673	-0.411025	0.326602	0.138373	0.234187
CG10139	228.843	-0.276074	0.198815	0.140771	0.237545
CG10147	146.824	-0.238231	0.231173	0.264276	0.383565
CG10163	2.00037	-0.574239	1.43566	0.175875	0.283062
CG10164	0	0	1.84404	NA	NA
CG10171	136.566	0.45086	0.232515	0.0351471	0.0779755
CG10176	451.357	-0.505992	0.21999	0.0131759	0.034349
CG10177	0	0	1.84404	NA	NA
CG10178	538.543	-3.08321	0.33088	6.27304e-22	3.34152e-20
CG10184	124.339	0.521586	0.377695	0.0863779	0.161474
CG10188	735.017	0.179337	0.199569	0.340501	0.461544
CG10189	114.052	-0.278702	0.292249	0.277555	0.398036
CG10195	238.529	-1.00404	0.257121	1.28744e-05	8.1422e-05
CG10202	0	0	1.84404	NA	NA
CG10205	800.602	0.324416	0.272069	0.182128	0.291619
CG10208	113.5	1.21328	0.296149	2.54688e-06	1.88265e-05
CG10211	2327.03	-0.781929	0.238847	0.00032469	0.00142382
CG10214	92.9052	-0.973073	0.422777	0.0030905	0.00996791
CG10217	1748.59	-0.574371	0.169345	0.000387509	0.00164659
CG10219	1660.74	-0.595124	0.280994	0.0165845	0.041842
CG10253	164.95	-0.065371	0.244135	0.769792	0.837901
CG10257	140.756	-0.23038	0.304991	0.384183	0.505622
CG10262	92.2394	0.529868	0.26784	0.0270293	0.0624319
CG10264	8.49066	1.67661	2.21796	NA	NA
CG10265	68.7759	-1.26726	0.378113	4.29743e-05	0.000233954
CG10286	340.657	0.517589	0.241621	0.0190214	0.0469135
CG10289	10311.2	-0.603495	0.708144	0.125707	0.217908
CG10306	1054.72	-0.0990241	0.255467	0.669094	0.756997
CG10307	1768.63	1.22714	0.581243	0.00235823	0.00794844
CG10311	1149.47	0.0328835	0.177593	0.846245	0.894182
CG10320	2013.3	-0.67981	0.226443	0.00111348	0.00413331
CG10324	195.246	0.0989644	0.221301	0.630611	0.726042
CG10326	354.517	0.0316419	0.229056	0.881299	0.917166
CG10333	629.666	-0.0278833	0.198951	0.881903	0.917598
CG10336	55.833	-0.212009	0.508499	0.533835	0.646129
CG10337	99.9899	0.214965	0.296952	0.407893	0.530343
CG10339	2375.74	-0.188597	0.22448	0.365132	0.487125
CG10343	149.295	0.199441	0.270854	0.410816	0.532669
CG10344	39.4264	0.127391	0.36875	0.669886	0.757166
CG10345	87988.6	0.611865	0.22527	0.00324748	0.0104093
CG10348	594.826	-0.0407971	0.350639	0.888178	0.922641
CG10352	26.5889	-5.45363	0.900393	1.51331e-10	2.42834e-09
CG10353	1264.3	0.030039	0.202068	0.874558	0.913075
CG10362	280.078	0.283107	0.2169	0.161353	0.264334
CG10365	483.726	-0.763367	0.26747	0.0013625	0.00496478
CG10366	228.009	-0.592464	0.24097	0.00706606	0.0203061
CG10375	383.146	-0.0494715	0.155965	0.742426	0.817158
CG10376	415.98	0.0420262	0.192993	0.818083	0.874076
CG10383	784.173	-0.754133	0.162473	1.22678e-06	9.5752e-06
CG10396	0.482304	-0.252086	1.17687	0.480862	NA
CG10399	39.4536	-0.529071	0.403188	0.0938161	0.172631
CG10407	16.3473	-4.01884	0.942121	1.02978e-06	8.14832e-06
CG1041	758.057	-0.794827	0.155364	9.79154e-08	9.47432e-07
CG10413	929.545	-0.329419	0.162549	0.0350232	0.0777675
CG10418	41.4946	-0.867732	0.530883	0.019191	0.0472191
CG10425	467.067	0.791613	0.192451	1.20249e-05	7.66122e-05
CG10426	390.517	-0.39716	0.186491	0.0247838	0.0581026
CG10428	135.818	-1.66996	0.375242	1.67327e-07	1.54114e-06
CG10431	65.8378	0.207238	0.28824	0.414847	0.536684
CG10435	526.862	0.273854	0.252442	0.232401	0.349379
CG10444	528.235	-1.61707	0.278762	1.29427e-10	2.10962e-09
CG10463	110.337	-0.679744	0.346852	0.0184452	0.0457323
CG10465	771.277	0.882499	0.232222	3.16751e-05	0.000180248
CG10466	63.8186	0.319654	0.296216	0.217402	0.333328
CG10470	368.761	-0.356534	0.24328	0.108911	0.194317
CG10479	95.3964	-0.78536	0.305714	0.00290726	0.00947061
CG10505	11.6565	0.867047	0.946757	0.0591169	0.12007
CG10508	3557.12	-4.36818	0.590075	2.42991e-14	6.18491e-13
CG10510	0.213467	-0.152187	1.12477	0.658785	NA
CG10527	4999.87	-0.569599	0.197166	0.00213428	0.00728872
CG10561	500.243	-0.673715	0.242188	0.0022486	0.0076337
CG10565	1351.16	-0.683635	0.21974	0.000770937	0.0030041
CG10566	146.905	0.253217	0.247487	0.261923	0.381227
CG10570	8961.58	-0.583756	0.215333	0.00354273	0.0111754
CG10576	1330	0.248496	0.189204	0.166031	0.27037
CG10581	46.3231	-2.10438	0.743158	7.46221e-05	0.000382133
CG10584	165.796	-0.602089	0.251723	0.00823029	0.0230994
CG10589	0	0	1.84404	NA	NA
CG10590	669.428	0.758651	0.188879	2.02488e-05	0.000120954
CG10591	0.459486	0.241738	1.16942	0.49727	NA
CG10592	4.80647	-0.477501	1.14975	0.241812	0.359933
CG10616	499.192	0.28488	0.169538	0.0794982	0.151017
CG10621	554.961	6.57057	0.376022	1.03496e-69	3.81973e-67
CG10623	248.301	-0.664775	0.277815	0.00687563	0.0198361
CG10628	174.832	-0.492441	0.251993	0.0311259	0.0703777
CG10635	214.685	-1.08926	0.462017	0.00182309	0.00633058
CG10639	384.864	-0.127465	0.230535	0.549578	0.659315
CG10654	45.0048	-1.14871	0.407596	0.000390399	0.00165751
CG10659	0.301468	-0.0091293	1.09055	0.978378	NA
CG10660	274.818	-0.626498	0.190648	0.000496815	0.00203089
CG10671	1095.78	0.216875	0.185668	0.219001	0.335084
CG10674	265.527	0.698724	0.304387	0.00794747	0.0224274
CG10694	0.0711558	-0.0734839	1.09936	0.828194	NA
CG10702	450.092	0.859525	0.342869	0.00266426	0.00876829
CG10710	113.838	-0.936952	0.250078	3.17815e-05	0.000180655
CG10713	35.5392	0.694272	0.441661	0.0373688	0.0818154
CG10725	0	0	1.84404	NA	NA
CG10731	126.956	0.292694	0.340106	0.304203	0.424013
CG10738	37.5868	0.0347187	0.308835	0.896597	0.928028
CG1074	247.287	-0.20635	0.261213	0.381373	0.503077
CG10747	545.434	-0.528932	0.212249	0.00751985	0.021396
CG10748	0	0	1.84404	NA	NA
CG10749	0	0	1.84404	NA	NA
CG10750	0	0	1.84404	NA	NA
CG10754	336.259	-0.113817	0.233288	0.596783	0.70177
CG10761	0.213467	-0.152187	1.12477	0.658785	NA
CG1077	3.21255	0.38921	0.828643	0.303975	0.423809
CG10777	6862.71	0.203207	0.618517	0.561439	0.670955
CG10778	161.933	0.71998	0.291421	0.00471962	0.014328
CG10799	26.9016	7.15049	1.3758	2.66638e-09	3.33588e-08
CG10802	327.777	-0.643669	0.23217	0.00252061	0.00840259
CG10809	139.726	-0.277559	0.218118	0.171791	0.277736
CG10814	0.099053	0.062845	1.09734	0.852538	NA
CG10822	0	0	1.84404	NA	NA
CG10834	0	0	1.84404	NA	NA
CG10839	0	0	1.84404	NA	NA
CG10841	1.53533	0.381802	1.0592	0.324056	0.444255
CG10859	2.6297	0.179273	0.933348	0.612689	0.71301
CG10864	86.8869	-0.0905231	0.313185	0.737174	0.813016
CG10869	3.87068	-2.16074	2.11673	0.00915478	0.0252013
CG10874	307.327	0.203964	0.21916	0.317478	0.437559
CG10898	170.516	-0.165086	0.257717	0.47913	0.597138
CG10899	1.05778	-0.398865	1.28841	0.299115	0.419411
CG10903	159.012	0.261255	0.325105	0.344913	0.465925
CG10904	118.032	-0.439124	0.314247	0.103975	0.186606
CG10907	184.126	-0.0135784	0.240924	0.951004	0.96596
CG1091	690.174	-0.611076	0.166101	0.000120932	0.000590045
CG10912	4.03254	-0.958372	1.30827	0.0633658	0.126414
CG10914	100.987	-0.373243	0.274396	0.127092	0.219773
CG10915	634.497	0.558162	0.34149	0.0506472	0.105607
CG10919	0.120576	-0.0784281	1.10041	0.816974	NA
CG1092	613.259	1.10159	0.189701	5.79947e-10	8.37035e-09
CG10920	0	0	1.84404	NA	NA
CG10932	648.019	0.732004	0.181511	2.05813e-05	0.000122657
CG10933	107.775	0.487464	0.281332	0.0502882	0.104901
CG10936	1712.42	-1.43645	0.380362	5.10434e-06	3.53067e-05
CG10947	1237.24	0.500614	0.227169	0.0169975	0.0426754
CG10949	112.246	-2.07029	0.302677	1.37033e-13	3.20385e-12
CG10950	1.9229	-0.82315	1.52095	0.095445	0.175033
CG10962	16.5559	-0.295377	0.540427	0.396658	0.518407
CG10970	21.8944	4.41422	0.942771	2.24126e-07	2.02458e-06
CG10979	556.535	0.134622	0.150809	0.356107	0.477552
CG10996	0.350319	0.0751642	1.09595	0.824544	NA
CG11007	131.861	-0.0692669	0.294974	0.788786	0.852638
CG11018	0.213467	-0.152187	1.12477	0.658785	NA
CG1103	87.0112	-0.86637	0.378345	0.00459259	0.0140082
CG11030	378.308	0.0102888	0.219628	0.959874	0.972918
CG11034	256.842	-0.69636	0.211206	0.000393487	0.00166379
CG11035	266.121	-0.362868	0.203951	0.0581675	0.118463
CG11041	19.189	0.122778	0.614742	0.722405	0.801346
CG11044	457.141	0.203709	0.252136	0.374099	0.495887
CG1105	949.591	0.0793592	0.161682	0.610099	0.711277
CG11050	2575.72	0.350973	0.211474	0.0758258	0.145539
CG11052	23.0882	-1.33191	0.77555	0.00492974	0.0148739
CG11068	15.5067	-0.503838	0.788606	0.198062	0.310305
CG11069	218.449	-0.728934	0.282313	0.00338096	0.0107504
CG11070	1059.27	-0.142569	0.162277	0.36119	0.483114
CG11073	17210.2	0.686172	0.196263	0.00019787	0.000915303
CG11077	168.998	-1.75015	0.365975	3.04845e-08	3.21456e-07
CG11089	166.665	-0.524697	0.28357	0.0361286	0.0796745
CG11095	132.567	-0.471074	0.393196	0.129866	0.223278
CG11099	285.683	0.317131	0.218241	0.118524	0.208304
CG11107	1021.55	-0.0527993	0.164483	0.738428	0.813878
CG11110	108.6	0.632384	0.293531	0.0137011	0.0355568
CG11123	193.07	-0.16744	0.233076	0.43598	0.557602
CG11125	91.1066	-1.89534	0.376014	7.42031e-09	8.6353e-08
CG11127	240.841	-2.32395	0.48892	3.19275e-08	3.35304e-07
CG11131	4.14409	-0.408929	1.0445	0.296745	0.417673
CG11134	78.0185	-0.130812	0.326742	0.637403	0.731718
CG11137	900.629	-0.291548	0.188277	0.102562	0.184582
CG11141	490.037	-0.555696	0.138648	3.61878e-05	0.000201056
CG11145	0	0	1.84404	NA	NA
CG11147	25203.1	1.66935	0.42171	1.53251e-06	1.17484e-05
CG11148	4304.62	-0.206409	0.233672	0.337848	0.459022
CG11151	3945.49	0.118304	0.191656	0.514677	0.630025
CG11158	171.243	0.522095	0.261174	0.0262862	0.0610432
CG11162	0.153792	0.062845	1.09734	0.852538	NA
CG11164	72.1516	-0.10409	0.499027	0.757434	0.827938
CG11168	877.286	-0.188835	0.210343	0.337715	0.458962
CG11170	46.4461	-0.326922	0.394446	0.292616	0.413778
CG11178	240.23	0.173432	0.194752	0.346265	0.467263
CG11190	2901.97	-3.12692	0.545636	4.0184e-10	6.00089e-09
CG11191	558.31	-0.125374	0.189346	0.485164	0.602316
CG11192	0	0	1.84404	NA	NA
CG11200	2234.91	-1.54712	0.174488	1.52483e-20	6.62082e-19
CG11208	1418.98	1.16953	0.126294	1.33906e-21	6.78326e-20
Tmem63	1433.13	0.69107	0.185176	7.93387e-05	0.000404682
CG11221	847.037	-4.37954	0.652744	3.19464e-12	6.52439e-11
CG11226	0.740939	0.0326935	1.07233	0.923127	NA
CG11236	3.20513	0.268026	0.784533	0.457545	0.578028
CG1124	2116.43	4.67426	0.274709	1.56754e-65	4.4997e-63
CG11241	221.671	-1.89641	0.371088	5.14408e-09	6.18126e-08
CG11247	399.935	-0.872049	0.159931	1.1837e-08	1.32672e-07
CG11248	424.278	0.333693	0.189293	0.0628664	0.12566
CG11249	12.047	2.59253	1.15788	0.000404612	0.0016997
CG11251	0	0	1.84404	NA	NA
CG11257	117.247	-0.413161	0.298971	0.11304	0.200302
CG11267	308.659	0.584995	0.301493	0.0254638	0.0594003
CG11269	1.68611	-0.745136	1.45854	0.115487	0.204077
CG11275	535.304	0.415813	0.186256	0.0186107	0.0460322
CG11279	51.0985	-0.378964	0.370886	0.207214	0.320178
CG11289	0	0	1.84404	NA	NA
CG11298	0	0	1.84404	NA	NA
CG11307	225.646	0.501345	0.312726	0.0623911	0.125048
CG11309	1207.94	-0.417828	0.203063	0.0284617	0.0653027
CG11318	0.745192	-0.331877	1.23322	0.371239	NA
CG11320	6.18883	0.0455768	0.768162	0.894285	0.926935
CG11333	0.142312	-0.118432	1.11177	0.728799	NA
CG11340	0.297159	0.174718	1.1339	0.614765	NA
CG11342	19.2425	-1.20703	0.76522	0.008735	0.0242394
CG11349	0	0	1.84404	NA	NA
CG1136	405.532	-0.515057	0.172575	0.00177471	0.0061792
CG11368	4128.99	-0.148563	0.303486	0.573414	0.682052
CG11369	0.188136	0.062845	1.09734	0.852538	NA
CG11373	0	0	1.84404	NA	NA
CG11377	464.468	0.277333	0.174506	0.0963596	0.176307
CG11378	410.771	3.64006	0.403735	2.4638e-20	1.04348e-18
CG11379	0.099053	0.062845	1.09734	0.852538	NA
CG11382	72.2833	0.120271	0.961566	NA	NA
CG11384	16.6618	1.76367	2.3967	NA	NA
CG1139	30.5433	-0.0641656	0.39645	0.836158	0.887197
CG11391	282.012	-0.317756	0.586766	0.370972	0.493381
CG11398	410.017	2.58724	0.835377	2.92644e-05	0.000168384
CG11399	841.269	-0.297082	0.250783	0.192713	0.304209
CG11400	565.035	2.70837	0.290593	3.47399e-22	1.90959e-20
CG11403	125.529	-0.451496	0.223719	0.0293273	0.0669617
CG11404	0.099053	0.062845	1.09734	0.852538	NA
CG11407	9174.88	-16.4997	1.05976	1.08205e-55	2.23638e-53
CG11409	38.6896	0.320773	0.554529	0.361626	0.483571
CG11412	574.936	-0.70277	0.156323	2.86843e-06	2.10528e-05
CG11413	208.801	-0.547038	0.336818	0.0532338	0.110332
CG11414	1113.59	0.213825	0.155769	0.154863	0.255975
CG11417	830.326	-2.39983	0.47954	9.51806e-09	1.09046e-07
CG11425	373.604	-2.40988	0.254641	6.73925e-23	4.04904e-21
CG11426	599.294	1.0316	0.30675	9.38e-05	0.000470548
CG11436	115.26	-0.442117	0.356071	0.131734	0.225611
CG11437	23.3766	3.91258	0.927025	1.15746e-06	9.07523e-06
CG11444	881.292	0.96483	0.21114	7.91749e-07	6.44247e-06
CG11447	109.245	-1.77998	0.407965	2.23046e-07	2.01836e-06
CG11453	99.3508	-0.254502	0.352526	0.382252	0.504004
CG11454	223.99	0.0745217	0.201211	0.694221	0.777594
CG1146	972.238	-0.300815	0.259593	0.199447	0.311813
CG11523	171.733	-0.181572	0.20508	0.346033	0.467073
CG11529	1403.34	-1.18519	0.624773	0.00446226	0.013651
CG11534	188.313	-0.602511	0.323487	0.0285842	0.0655546
CG11539	59.5772	-0.510147	0.321997	0.0631514	0.126034
CG11550	351.933	-3.281	0.371652	7.70272e-20	3.08527e-18
CG11562	48.2816	-0.844019	0.401741	0.00782726	0.0221487
CG11563	247.514	0.711559	0.306197	0.00710551	0.0203968
CG11576	527.921	-0.780673	0.2208	0.000126894	0.000612769
CG11581	0	0	1.84404	NA	NA
CG11583	303.05	0.0748344	0.264336	0.753229	0.824388
CG11586	125.586	-0.712032	0.28027	0.00400308	0.0124485
CG11590	130.201	-0.12686	0.251694	0.579488	0.68722
CG11596	277.977	-0.399062	0.283692	0.111644	0.198304
CG11619	191.104	-8.07149	0.768828	2.8775e-28	2.12401e-26
CG11629	0	0	1.84404	NA	NA
CG11634	0	0	1.84404	NA	NA
CG11635	117.38	-0.343631	0.543075	0.327742	0.448475
CG11638	135.996	-0.0402698	0.31293	0.881259	0.917166
CG11652	539.65	0.873283	0.278837	0.000380512	0.00162086
CG11655	1159.2	1.17165	0.158886	1.09332e-14	2.91196e-13
CG11656	0.553683	0.119422	1.10698	0.727031	NA
CG11659	0	0	1.84404	NA	NA
CG11663	0.099053	0.062845	1.09734	0.852538	NA
CG11664	0	0	1.84404	NA	NA
CG11666	0	0	1.84404	NA	NA
CG11672	0	0	1.84404	NA	NA
CG11674	82.0265	-1.36911	1.79459	0.0313166	0.0707224
CG11679	139.01	-0.367307	0.291565	0.151478	0.251749
CG11686	215.372	-0.587376	0.400752	0.0623186	0.125
CG11693	0.598627	0.134931	1.11185	0.69446	NA
CG11697	0	0	1.84404	NA	NA
CG11699	387.013	-0.575268	0.251863	0.0116553	0.0309471
CG11722	134.653	-0.66638	0.265304	0.00498129	0.014999
CG11741	0.467368	0.140069	1.1142	0.683831	NA
CG11753	150.369	-0.309576	0.304692	0.241786	0.359933
CG11755	35.3648	-0.797156	0.777116	0.060618	0.122301
CG11760	138.271	-0.292684	0.269093	0.224857	0.341014
CG11777	75.9657	-1.26988	0.31264	2.44369e-06	1.81416e-05
CG11779	472.064	0.62412	0.225738	0.00272037	0.00892487
CG11781	239.366	0.552808	0.254507	0.0162715	0.0411528
CG11786	11.0747	1.00417	1.6171	NA	NA
CG11788	65.0498	0.407992	0.359066	0.166347	0.270713
CG11796	11850.1	1.18278	0.278082	1.42192e-06	1.09986e-05
CG11807	608.314	-0.573362	0.158767	0.000171539	0.000805765
CG11808	109.743	-1.0944	0.489247	0.00247095	0.00827211
CG11811	208.946	-0.870732	0.283002	0.000461062	0.00190432
CG11816	0	0	1.84404	NA	NA
CG11825	24.1584	-0.371168	0.467465	0.269453	0.389412
CG11835	1427.85	-0.105291	0.169582	0.517256	0.632273
CG11839	92.7966	0.447412	0.318665	0.100866	0.182587
CG11842	188.291	3.08346	0.277577	6.41751e-30	5.10142e-28
CG11857	614.427	0.148557	0.213728	0.457017	0.577628
CG11858	130.093	0.0299263	0.258526	0.8982	0.929129
CG11865	0	0	1.84404	NA	NA
CG11885	103.304	0.288689	0.299883	0.269624	0.389474
CG11889	161.985	-0.00933025	0.267387	0.969013	0.979466
CG11906	240.3	0.399105	0.21766	0.0487841	0.102217
CG11911	5.00758	-0.970959	1.44088	0.0660734	0.130655
CG11912	0	0	1.84404	NA	NA
CG11920	124.61	-0.30285	0.305615	0.2532	0.371883
CG11929	0.241365	-0.0479145	1.093	0.887167	NA
CG11964	360.967	-0.545854	0.198948	0.00351532	0.0110957
CG11966	2.32203	0.0105103	0.890496	0.975588	0.983967
CG11970	917.065	0.447416	0.182937	0.010053	0.0272671
CG11975	483.133	0.576045	0.161894	0.000208697	0.00095767
CG11977	0.229743	0.150228	1.12304	0.662799	NA
CG11980	353.326	-1.29951	0.286544	2.54078e-07	2.25571e-06
CG11985	129.567	0.124143	0.275152	0.613088	0.713153
CG11999	511.771	0.839877	0.147689	3.49714e-09	4.30231e-08
CG12003	0.383464	-0.217074	1.15639	0.537971	NA
CG12004	1050.37	0.459385	0.178308	0.00683375	0.0197594
CG12006	575.843	-0.788635	0.221531	0.000112779	0.000556571
CG12007	273.832	-1.43311	0.256137	6.17297e-10	8.83539e-09
CG12016	420.853	0.494231	0.187009	0.00528123	0.0157826
CG12018	111.201	-0.0289741	0.283146	0.908065	0.934946
CG12024	277.115	0.0756236	0.197511	0.685098	0.769971
CG12025	437.479	0.524216	0.229908	0.0133166	0.0346285
CG12027	1.14669	0.117931	0.980585	0.734671	0.811294
CG12034	255.384	0.103314	0.288151	0.684392	0.76942
CG12035	0	0	1.84404	NA	NA
CG12038	98.0884	0.889484	0.280402	0.000313001	0.00137993
CG12050	483.223	0.729688	0.259897	0.00175157	0.0061234
CG12056	356.094	-0.715903	0.198057	0.000116063	0.000570595
CG12057	5.46105	-0.451636	1.14425	NA	NA
CG12081	233.754	0.446215	0.2474	0.0475796	0.10007
CG12090	2202.97	-0.112791	0.282004	0.652024	0.743218
CG12091	1693.77	-0.244534	0.177452	0.148797	0.248492
CG12096	449.163	0.0185935	0.14834	0.897025	0.928214
CG12099	3493.92	0.179491	0.138459	0.182471	0.291897
CG12104	137.098	0.162874	0.246787	0.46972	0.588659
CG12106	90.1268	0.580985	0.301196	0.0263881	0.0612522
CG12107	259.005	-0.420876	0.250437	0.0643611	0.128152
CG12111	11.5691	0.0943668	0.587312	0.783843	0.84837
CG12115	0.361728	-0.206909	1.15078	0.555636	NA
CG12116	8.53077	-0.0694188	0.716321	0.839899	0.88966
CG12118	508.582	0.244709	0.217232	0.226777	0.343423
CG12121	1840.91	0.854535	0.173576	2.14796e-07	1.95397e-06
CG12123	57.8552	-0.289328	0.309366	0.279166	0.399571
CG12125	247.754	-0.170128	0.278365	0.492093	0.609454
CG12126	0	0	1.84404	NA	NA
CG12128	462.816	1.13108	0.219106	1.97562e-08	2.12667e-07
CG12134	149.074	-0.505497	0.279307	0.0411935	0.0889828
CG12147	0	0	1.84404	NA	NA
CG12155	822.709	1.31755	0.489094	0.000352226	0.00151865
CG12158	5231.59	-0.450696	0.403952	0.153083	0.253926
CG12159	205.813	0.17064	0.212107	0.389776	0.51155
CG12162	896.323	0.266717	0.227107	0.204517	0.317402
CG12164	56.3827	0.913519	1.7571	NA	NA
CG12179	163.462	-0.635528	0.380569	0.0377794	0.0825745
CG1218	319.478	-0.0505796	0.263151	0.831147	0.88365
CG12182	98.117	0.71906	0.318377	0.00816617	0.0229568
CG12194	261.374	-0.414314	0.204126	0.0305803	0.0693629
CG12203	2295.08	0.459061	0.157774	0.00250746	0.00836952
CG12207	842.051	0.0158209	0.183754	0.927916	0.948475
CG12209	1.27496	-0.564682	1.34021	0.18621	0.296501
CG12219	291.393	-0.439347	0.265942	0.0655826	0.129933
CG12229	134.351	9.25038	1.08483	6.82725e-21	3.1218e-19
CG12231	0	0	1.84404	NA	NA
CG12237	481.222	1.26528	0.230704	1.96325e-09	2.52341e-08
CG12253	75.915	-0.16057	0.361771	0.587048	0.69332
CG12262	5186.4	-0.453493	0.173876	0.00630516	0.0184269
CG12267	105.375	-0.164245	0.310825	0.540445	0.65184
CG1227	82.0805	-7.09571	0.838665	4.91407e-19	1.85336e-17
CG12272	520.457	-0.388035	0.169791	0.0169899	0.0426754
CG12290	24249.8	-4.69328	0.613214	3.70944e-15	1.04167e-13
CG12307	0	0	1.84404	NA	NA
CG12321	721.32	0.0176861	0.188417	0.921228	0.94392
CG12325	234.502	0.314973	0.284045	0.209991	0.323887
CG1233	954.333	0.391346	0.181843	0.0236739	0.0559574
CG12333	263.393	-0.297203	0.176641	0.0779766	0.148728
CG12338	206.469	0.0669461	0.256379	0.773265	0.840619
CG1234	416.578	-0.364926	0.209012	0.0621762	0.124811
CG12341	96.3337	0.369301	0.246955	0.100888	0.182587
CG12343	279.542	-0.573931	0.2444	0.00992057	0.0269645
CG12360	554.379	0.153959	0.212519	0.438571	0.560076
CG12362	1.61908	0.0539934	1.0239	0.874729	0.913075
CG12374	11.412	-2.12551	1.27474	0.00229092	0.00775191
CG12375	675.132	-0.231709	0.182933	0.183201	0.292717
CG12379	30.8476	-0.609354	0.611406	0.107787	0.192521
CG1239	108.008	-0.699779	0.379883	0.0221302	0.0529382
CG12391	908.474	0.758837	0.332441	0.00675307	0.0195589
CG12395	0	0	1.84404	NA	NA
CG12400	1017.44	-0.491849	0.306673	0.0637974	0.127176
CG12404	549.499	0.408665	0.22646	0.0510364	0.106208
CG12426	0	0	1.84404	NA	NA
CG12438	0	0	1.84404	NA	NA
CG12439	0	0	1.84404	NA	NA
CG12446	1.28564	-0.43849	1.32345	0.263761	0.383352
CG12448	9.70822	0.328538	0.614559	0.359413	0.481236
CG1246	49.0063	1.24724	0.414965	0.000155341	0.000736375
CG12464	0	0	1.84404	NA	NA
CG12470	1.7337	-1.1901	1.62207	0.0426308	0.0914756
CG12479	0	0	1.84404	NA	NA
CG12496	0.099053	0.062845	1.09734	0.852538	NA
CG12498	0	0	1.84404	NA	NA
CG12507	4.3911	2.01349	1.93532	0.0103326	0.0278211
CG12511	0	0	1.84404	NA	NA
CG12512	620.794	0.659845	0.269472	0.00602152	0.0177283
CG12516	0	0	1.84404	NA	NA
CG12517	0.0711558	-0.0734839	1.09936	0.828194	NA
CG12531	415.966	1.41668	0.719226	0.00223733	0.00760544
CG12540	1.4858	0.467554	1.34956	0.240873	0.359472
CG12541	526.207	-2.09376	0.718986	5.7345e-05	0.000300204
CG12576	1296.01	0.55276	0.164086	0.000441795	0.00183797
CG12589	0.0711558	-0.0734839	1.09936	0.828194	NA
CG12590	0	0	1.84404	NA	NA
CG12608	399.302	-1.87608	0.269742	5.96136e-14	1.45294e-12
CG12609	0	0	1.84404	NA	NA
CG12617	0	0	1.84404	NA	NA
CG12620	0	0	1.84404	NA	NA
CG12637	0.241152	-0.157923	1.1272	0.64735	NA
CG12643	9.10783	-0.0712381	0.613361	0.835877	0.887197
CG12645	1.11632	0.473828	1.2878	0.24181	0.359933
CG1265	618.559	0.143643	0.282517	0.566266	0.674948
CG12655	203.794	-1.92519	0.575005	1.35303e-05	8.49467e-05
CG12659	25.6541	0.523855	0.497287	0.132833	0.226742
CG12661	0.906669	-0.366869	1.26133	0.331492	NA
CG12674	0	0	1.84404	NA	NA
CG12679	0	0	1.84404	NA	NA
CG12680	5.69518	2.19944	1.55798	0.00416585	0.0128969
CG12682	0	0	1.84404	NA	NA
CG12689	0.202415	-0.0784281	1.10041	0.816974	NA
CG12698	0.475985	-0.241863	1.17061	0.496952	NA
CG12699	0	0	1.84404	NA	NA
CG12702	30.6503	-1.16664	1.09233	0.0259464	0.0604441
CG12708	74.3567	-8.6847	1.51086	1.20138e-11	2.32493e-10
CG12713	52.431	0.164787	0.402796	0.598528	0.702862
CG12716	0.646351	-0.306564	1.21406	0.403042	NA
CG12721	17.4622	-0.477723	0.77118	0.216547	0.332411
CG12729	0.202415	-0.0784281	1.10041	0.816974	NA
CG1273	14.6504	0.040043	0.624512	0.907137	0.934818
CG12730	226.255	-0.734877	0.248972	0.0011041	0.00410718
CG12736	372.575	-0.705345	0.270114	0.00335618	0.0106848
CG12744	33.5923	0.895924	0.54693	0.0174716	0.0436384
CG12746	1246.96	0.588035	0.179384	0.000562413	0.00227921
CG12768	137.654	1.37584	0.357475	4.41442e-06	3.11178e-05
CG12773	762.063	0.488338	0.169352	0.00258015	0.00858442
CG12782	0	0	1.84404	NA	NA
CG12795	182.512	-0.593941	0.243122	0.00734237	0.0209834
CG12796	2.26671	-1.67112	1.84033	0.0179847	0.044741
CG12811	484.762	0.322568	0.241396	0.14451	0.24235
CG12818	82.0201	0.132909	0.299624	0.61124	0.711645
CG12825	170.365	1.04139	0.496218	0.00411728	0.0127695
CG12826	51.2374	5.26682	0.927778	1.53174e-09	2.03981e-08
CG12828	0	0	1.84404	NA	NA
CG12831	0	0	1.84404	NA	NA
CG12848	239.86	-0.773365	0.265405	0.00109503	0.00407931
CG12849	1.34551	0.146475	1.10441	0.671665	0.758578
CG12858	525.371	-0.217425	0.354877	0.457117	0.577628
CG12859	708.545	-0.351017	0.262513	0.137614	0.233285
CG12861	0	0	1.84404	NA	NA
CG12863	69.1429	-0.640798	0.516803	0.0735016	0.142187
CG12866	0	0	1.84404	NA	NA
CG12869	56.0954	1.03892	0.382025	0.000767273	0.00299207
CG12880	19.3855	0.493761	0.752557	0.201928	0.314456
CG12895	329.793	-0.849751	0.382203	0.00573603	0.0169748
CG12909	76.358	-0.93188	0.429217	0.00492185	0.0148633
CG1291	552.209	1.3966	0.210992	1.06386e-12	2.26212e-11
CG12913	79.8812	1.46778	0.326563	1.93565e-07	1.77647e-06
CG12914	0.0711558	-0.0734839	1.09936	0.828194	NA
CG12920	5.34886	0.841436	1.71406	NA	NA
CG12926	201.809	-0.906062	0.224729	1.11783e-05	7.16602e-05
CG12929	57.3641	-0.254825	0.397604	0.413292	0.53494
CG12935	90.6888	0.346945	0.307107	0.191975	0.303252
CG12948	104.657	-0.0476837	0.272318	0.844806	0.893209
CG12963	27.7149	3.13201	0.581154	2.65675e-09	3.3319e-08
CG12975	71.4538	0.236331	0.276999	0.337988	0.459091
CG12984	3.12351	0.725207	1.44819	0.121359	0.212131
CG12985	9.17132	-0.547596	0.651764	0.150538	0.250616
CG12986	0.120576	-0.0784281	1.10041	0.816974	NA
CG12995	0.538524	0.0944174	1.09606	0.781592	NA
CG13000	1.77889	-0.522562	1.40171	0.203453	0.316163
CG13004	136.204	-0.186877	0.31362	0.488803	0.606397
CG13005	74.9545	-0.484811	0.357745	0.0994019	0.180658
CG13010	2.29044	-0.451776	1.13619	0.261449	0.380751
CG13012	382.563	-0.0786204	0.318006	0.773003	0.84051
CG13014	158.247	1.20782	0.370846	7.32538e-05	0.000375871
CG13016	154.78	-0.335248	0.29725	0.19688	0.308782
CG13018	34.249	-0.2483	0.581379	0.478691	0.596862
CG13023	16.4497	-6.56037	1.31634	1.73343e-08	1.8856e-07
CG13024	141.165	1.10762	0.344194	0.000118603	0.000580876
CG13026	413.485	-0.1777	0.272782	0.466153	0.58561
CG13028	1.07662	0.0312896	1.07121	0.926428	0.947516
CG13029	1.55333	0.480945	1.35763	0.231536	0.348585
CG13033	0.495265	0.251457	1.17542	0.481953	NA
CG13041	8.20131	0.512497	0.747404	0.187339	0.297657
CG13045	0.099053	0.062845	1.09734	0.852538	NA
CG13046	1.28769	0.435417	1.3202	0.266381	0.385908
CG13054	0.811101	-0.0490191	1.0652	0.885341	NA
CG13055	7.40214	1.15462	1.00265	0.0227012	0.0540042
CG13063	0.891477	0.358953	1.25417	0.340148	NA
CG13064	0	0	1.84404	NA	NA
CG13069	0.0711558	-0.0734839	1.09936	0.828194	NA
CG1307	317.51	0.263289	0.251498	0.249523	0.367867
CG13071	0	0	1.84404	NA	NA
CG13081	0.0711558	-0.0734839	1.09936	0.828194	NA
CG13082	19.0487	-0.56576	0.596257	0.12942	0.22283
CG13083	164.637	-3.96891	3.708	NA	NA
CG13088	104.828	1.25122	0.310026	2.91037e-06	2.1241e-05
CG1309	2171	-0.268779	0.142899	0.0525698	0.109044
CG13090	435.328	0.898479	0.291997	0.000415922	0.00174155
CG13097	186.405	-0.448928	0.347671	0.120272	0.210945
CG13101	590.066	-0.0250192	0.317968	0.926857	0.947768
CG13108	25.2699	0.639232	0.46581	0.0613382	0.123465
CG1311	2097.68	1.40175	0.17317	1.59711e-17	5.6138e-16
CG13110	0	0	1.84404	NA	NA
CG13114	1.37475	-0.582793	1.22441	0.17781	0.285679
CG13116	666.402	0.255314	0.1796	0.135904	0.231068
CG13117	166.646	0.347225	0.253973	0.131628	0.225505
CG13126	110.842	-1.74527	0.378231	7.00891e-08	7.03204e-07
CG13127	0	0	1.84404	NA	NA
CG13133	238.955	0.0771185	0.423974	0.809447	0.8679
CG13148	1.14614	-0.122304	0.953546	0.725695	0.804132
CG13151	83.7418	0.41374	0.372503	0.169748	0.275121
CG13154	1.25321	0.129958	1.09652	0.705714	0.788246
CG13157	0	0	1.84404	NA	NA
CG13168	1.21162	-0.0410865	0.926094	0.904946	0.933449
CG13170	0.62015	0.0139742	1.08287	0.966979	NA
CG13171	0	0	1.84404	NA	NA
CG13177	1802.04	-0.250555	0.277569	0.310435	0.430147
CG13183	35.1016	1.87914	1.03768	0.00186066	0.00643942
CG13185	659.032	-0.931622	0.245814	2.73222e-05	0.000158979
CG13186	0.306324	0.181702	1.13714	0.601558	NA
CG1319	286.691	-0.0765029	0.234553	0.723362	0.802063
CG13192	116.475	-1.59713	0.353021	1.30789e-07	1.23319e-06
CG13193	1.23154	-0.551072	1.33129	0.193503	0.304919
CG13204	255.252	0.266723	0.27256	0.273519	0.393779
CG13215	0.340418	0.019497	1.08709	0.953903	NA
CG13216	1.58916	0.345499	1.23984	0.355666	0.477083
CG13220	557.221	-0.377924	0.246616	0.0927835	0.171158
CG13228	0	0	1.84404	NA	NA
CG13229	19.2109	0.797816	0.631422	0.0438581	0.0936037
CG13230	0.0711558	-0.0734839	1.09936	0.828194	NA
CG13231	0.774655	-0.232952	1.1461	0.513254	NA
CG13239	3.16512	-2.31981	2.04593	0.00676899	0.0195831
CG1324	0	0	1.84404	NA	NA
CG13244	0	0	1.84404	NA	NA
CG13247	19.9732	-2.69167	0.837096	2.01775e-05	0.000120808
CG13248	179.221	-0.521616	0.316556	0.0545186	0.112497
CG13255	135.764	0.396747	0.249719	0.0806051	0.152559
CG13258	3.48929	0.192875	0.710283	0.582951	0.690217
CG13272	7.03277	1.03413	1.86609	NA	NA
CG13282	77.5833	0.788991	0.355518	0.00712894	0.0204527
CG13285	204.968	0.896509	0.279884	0.000274446	0.00122247
CG13293	809.485	0.325876	0.672908	0.368436	0.490393
CG13295	322.745	-0.0364783	0.22148	0.859422	0.902201
CG13296	0	0	1.84404	NA	NA
CG13297	21.3955	19.8788	3.36681	NA	NA
CG13298	341.224	-0.298691	0.196129	0.106735	0.190963
CG13305	1.21235	-0.175351	1.07136	0.617893	0.717182
CG13306	55.262	1.23939	0.42751	0.000226764	0.0010287
CG13309	0	0	1.84404	NA	NA
CG13310	0.598058	0.184759	1.13284	0.596376	NA
CG13311	0	0	1.84404	NA	NA
CG13312	0.153162	0.111796	1.10941	0.743078	NA
CG13313	0.893532	0.155554	1.07262	0.655647	NA
CG13314	10.3886	0.439082	0.63956	0.235261	0.35255
CG13315	15.6401	-0.0700793	0.617727	0.838511	0.888815
CG13318	81.7713	2.15048	0.438977	1.48789e-08	1.64624e-07
CG13321	18.8722	0.26017	0.783751	NA	NA
CG13323	1.0854	-0.342153	1.17619	0.364765	0.486761
CG13326	0.142312	-0.118432	1.11177	0.728799	NA
CG13330	1.354	-0.629851	1.37103	0.155961	0.257487
CG13332	30.6829	0.24026	0.348565	0.406186	0.528788
CG13334	0.447429	0.103638	1.10302	0.761057	NA
CG13339	193.496	-0.445944	0.22723	0.0336666	0.0752401
CG13344	181.24	0.113605	0.258874	0.627529	0.724529
CG13358	0.810755	0.341997	1.24047	0.359335	NA
CG13360	227.442	-3.1501	0.48022	2.56784e-12	5.32853e-11
CG13361	0.734174	0.323232	1.2258	0.381889	NA
CG13362	0.963927	-0.302332	0.968711	0.415745	NA
CG13365	164.687	-0.64291	0.254074	0.0050665	0.0152378
CG13367	217.178	-1.80568	0.334806	1.15751e-09	1.56567e-08
CG13369	404.992	-0.42032	0.231524	0.0488131	0.102236
CG13373	65.0791	-0.228465	0.333236	0.416424	0.538454
CG13375	19.3365	-0.689835	0.490328	0.0495756	0.103665
CG13377	566.939	-0.941438	0.205884	8.58139e-07	6.91732e-06
CG13384	524.611	0.16322	0.172138	0.321986	0.441887
CG1339	0.170209	-0.00429489	1.0906	0.989826	NA
CG13390	96.4228	-0.701363	0.328112	0.0115534	0.0307715
CG13392	104.633	0.0559474	0.336214	0.843124	0.891978
CG13397	158.919	-5.1043	0.733561	5.29298e-13	1.14911e-11
CG13398	116.106	-0.384524	0.267395	0.108784	0.194157
CG13403	0.297159	0.174718	1.1339	0.614765	NA
CG13405	4.43072	-0.649279	0.972428	0.130779	0.224571
CG13408	58.7017	-0.090863	0.524978	0.789326	0.852875
CG13409	187.599	0.428248	0.25355	0.0623739	0.125048
CG13426	0.645982	-0.29878	1.20839	0.413364	NA
CG13436	8.17147	0.171297	0.576126	0.620856	0.71863
CG13437	73.7913	0.0894622	0.279359	0.718691	0.799297
CG13443	0	0	1.84404	NA	NA
CG13445	0	0	1.84404	NA	NA
CG13454	1.3013	-0.161387	1.11175	0.641887	0.734905
CG13458	287.863	-0.219713	0.258618	0.347472	0.468525
CG13465	0.996181	-0.392537	1.28297	0.305234	0.42494
CG13473	5.06023	-2.347	2.23521	0.00733179	0.0209648
CG13477	0.508739	0.104723	1.10278	0.75872	NA
CG13484	83.0028	-0.415249	0.248372	0.0662003	0.130806
CG13488	14.822	-3.4484	1.45193	0.000263826	0.00118435
CG13500	0.344726	-0.184685	1.13945	0.5959	NA
CG13501	2.21256	0.922409	1.43927	0.0745656	0.143744
CG13506	2803.18	0.369001	0.200168	0.0501848	0.104727
CG13510	102.023	-1.44588	0.458538	5.50223e-05	0.000289889
CG13516	208.631	0.1267	0.300264	0.628518	0.724738
CG13526	0.198106	0.132603	1.11621	0.698915	NA
CG13531	961.844	0.885549	0.166604	2.40567e-08	2.57886e-07
CG13532	75.181	0.1438	0.328478	0.605626	0.708425
CG13538	0	0	1.84404	NA	NA
CG13539	0	0	1.84404	NA	NA
CG13541	0	0	1.84404	NA	NA
CG13544	0	0	1.84404	NA	NA
CG13557	0	0	1.84404	NA	NA
CG13558	3.03455	1.56485	1.53497	0.0168203	0.0423335
CG13559	2.58914	-0.20511	0.791143	0.562336	0.671813
CG13563	148.333	2.54107	0.477193	1.96322e-09	2.52341e-08
CG13564	0.594318	0.283148	1.19643	0.434983	NA
CG13565	2.41683	-1.20793	1.72605	0.04228	0.0909116
CG13566	7.25546	0.256043	0.716642	0.473603	0.592377
CG13575	18.7704	-0.634032	0.477884	0.0666375	0.131532
CG13578	303.024	-0.611945	0.288099	0.0156023	0.0396154
CG1358	165.667	1.63955	0.645771	0.000298588	0.00132316
CG13581	0	0	1.84404	NA	NA
CG13585	875.315	-0.0239369	0.188718	0.893682	0.926504
CG13599	21.335	-1.314	1.07485	0.0151721	0.0386737
CG1360	57.9018	0.425833	0.317535	0.117543	0.206931
CG13601	256.987	-0.0757701	0.192476	0.677631	0.76348
CG13605	560.288	0.243278	0.188027	0.172719	0.2788
CG13607	5.05896	-0.433747	0.955918	0.269223	0.389221
CG13613	0	0	1.84404	NA	NA
CG13622	2.48194	-0.285173	0.868744	0.435772	0.557602
CG13623	172.798	0.574714	0.292195	0.0247112	0.0580113
CG13630	364.84	-0.0689145	0.290186	0.787373	0.851477
CG13634	3.80208	0.20187	0.918563	0.571251	0.679948
CG13639	7.20882	-1.38668	1.12278	0.0132968	0.0345983
CG13640	1.72693	-0.168136	0.79557	0.631502	0.726728
CG13653	1.40733	-0.466005	1.34856	0.24199	0.359933
CG13663	260.754	-0.098034	0.202497	0.607035	0.709095
CG13667	121.812	-0.632381	0.302022	0.0157894	0.0400314
CG13671	315.828	0.163949	0.170433	0.315433	0.435422
CG13676	155.383	3.71078	0.40763	1.21627e-20	5.37134e-19
CG13685	482.615	-2.01449	0.947967	0.00069762	0.00274532
CG13689	72.1186	-0.448946	0.252562	0.0499556	0.104375
CG13690	150.615	-1.08559	0.721963	0.0134187	0.0348415
CG13692	8.38567	-0.575486	0.793356	0.151442	0.251749
CG13704	4.90521	0.267179	1.12695	NA	NA
CG1371	1973.52	-1.55309	0.372494	7.32847e-07	6.00099e-06
CG13712	2.06352	-0.560119	1.43784	NA	NA
CG13713	2.62793	-0.206733	1.12612	NA	NA
CG13723	0	0	1.84404	NA	NA
CG13724	0.099053	0.062845	1.09734	0.852538	NA
CG13725	0	0	1.84404	NA	NA
CG13728	0.175634	0.122528	1.11274	0.720101	NA
CG13737	4.24597	1.14506	1.82806	NA	NA
CG13742	72.8228	-3.49603	0.805856	5.47004e-07	4.58082e-06
CG13747	0	0	1.84404	NA	NA
CG13748	30.3294	4.84352	0.979124	7.16599e-08	7.17571e-07
CG13751	188.861	-0.904753	0.465194	0.00908258	0.0250559
CG13759	0.713041	-0.0390788	1.07641	0.908147	NA
CG13766	97.7278	-0.554087	0.266661	0.0202851	0.0493934
CG13771	1.13408	-0.366272	1.18582	0.338416	0.459552
CG13773	489.205	-0.362408	0.479104	0.284992	0.405328
CG13786	1.56749	-0.489155	1.3701	0.225265	0.341533
CG13801	0	0	1.84404	NA	NA
CG13806	1.69926	0.267652	1.17612	0.458419	0.578597
CG13807	144.764	-1.30514	0.393331	4.34174e-05	0.000235633
CG13810	4.15315	-0.250734	0.746261	0.483247	0.600658
CG13829	0.202415	-0.0784281	1.10041	0.816974	NA
CG13837	1.68003	0.794669	1.46763	0.102442	0.184515
CG13838	1.97383	-0.0937265	0.742378	0.7857	0.849846
CG13841	708.568	-0.441462	0.267521	0.0655274	0.129874
CG13843	6.73438	1.92036	1.37675	0.00525381	0.0157098
CG13856	104.893	-0.601409	0.231472	0.00469362	0.0142575
CG13857	28.3113	-5.89943	0.983702	1.49607e-10	2.40816e-09
CG13862	0	0	1.84404	NA	NA
CG13865	566.214	-0.104737	0.189251	0.55965	0.669533
CG13870	9.6138	-5.17685	1.27431	2.24067e-06	1.6779e-05
CG13872	0.755875	-0.35649	1.22556	0.345593	NA
CG13875	83.8569	-0.0193092	0.264557	0.935393	0.953665
CG13887	2257.92	0.51505	0.189109	0.00399124	0.0124233
CG13891	10.6276	-5.38368	1.73895	2.96214e-05	0.000169871
CG13893	1439.75	2.11393	0.146198	4.73635e-49	7.41597e-47
CG13895	259.507	0.379878	0.233745	0.0774383	0.14792
CG13898	0.142312	-0.118432	1.11177	0.728799	NA
CG13900	1849.71	0.138384	0.277692	0.575634	0.683748
CG13901	101.912	0.464612	0.315903	0.0864802	0.161607
CG13902	166.207	-1.25635	0.261154	7.5687e-08	7.54971e-07
CG13905	0	0	1.84404	NA	NA
CG13907	2310.66	0.95458	0.148845	2.46668e-11	4.48779e-10
CG13912	15.5124	2.14239	0.914844	0.000342173	0.00149199
CG13917	11350.6	-1.15224	0.566979	0.0035078	0.0110787
CG13919	70.2909	0.060029	0.283013	0.81084	0.869034
CG13920	602.064	1.14867	0.404922	0.000368234	0.00157636
CG13924	18.924	0.0619754	0.507775	0.854401	0.898334
CG13926	135.43	0.696102	0.268296	0.00362066	0.0114073
CG13931	1.69011	-0.219267	1.04456	0.541164	0.652402
CG1394	0.531937	-0.15688	1.12181	0.649833	NA
CG13949	14.5383	-0.333509	0.580173	0.348124	0.468792
CG13955	74.4145	-7.00566	0.799079	3.95382e-20	1.63435e-18
CG13957	392.235	1.03488	0.180196	1.1338e-09	1.54574e-08
CG13970	0	0	1.84404	NA	NA
CG13983	5.21678	4.64213	1.55989	5.30326e-05	0.000281045
CG13992	12.2525	-3.02517	1.65403	0.001067	0.0039893
CG13993	4255.8	5.65654	0.594232	2.09479e-22	1.1765e-20
CG13994	246.493	0.871921	0.246292	9.00926e-05	0.000455043
CG13998	0	0	1.84404	NA	NA
CG14000	0	0	1.84404	NA	NA
CG14005	173.856	-0.686767	0.24796	0.00224279	0.007619
CG14010	402.063	-0.0272086	0.320882	0.920962	0.94392
CG14013	2.0695	0.543694	1.42164	0.190977	0.30223
CG14014	17.1485	-20.4228	3.33693	NA	NA
CG1402	209.797	-1.13918	0.800366	0.0139078	0.0360208
CG14020	62.5362	0.173401	0.273795	0.478267	0.596747
CG14022	170.519	-0.239117	0.417909	0.453335	0.574676
CG14024	17.882	-0.353473	0.470148	0.293403	0.414324
CG14034	9.03305	0.710854	0.765468	0.0857572	0.160571
CG14036	11.0879	-2.03794	1.76885	0.00829259	0.0232363
CG14040	203.91	0.110261	0.231557	0.606069	0.708425
CG14044	73.8992	-0.411099	0.293152	0.109703	0.19546
CG14050	20.7451	-0.561744	0.506202	0.110785	0.196914
CG14062	0.170209	-0.00429489	1.0906	0.989826	NA
CG14069	2.73348	1.24556	1.76279	0.0394733	0.085733
CG14070	0.099053	0.062845	1.09734	0.852538	NA
CG14071	0.153162	0.111796	1.10941	0.743078	NA
CG14072	0.198106	0.132603	1.11621	0.698915	NA
CG14077	0	0	1.84404	NA	NA
CG14089	1.15738	0.111407	1.09203	0.744963	0.81794
CG1409	0	0	1.84404	NA	NA
CG14102	69.9136	-0.292096	0.249077	0.19783	0.310035
CG14106	12.4707	1.12549	0.769766	0.0132732	0.0345678
CG14107	3.61773	0.26653	1.04905	NA	NA
CG14110	0.269262	0.0633257	1.09434	0.851552	NA
CG14131	11.4113	0.178985	0.557693	0.604288	0.707564
CG14132	180.825	-0.501708	0.286288	0.0467321	0.0988394
CG14135	107.339	-0.160675	0.272913	0.510122	0.625635
CG14137	1.53309	-0.114245	0.93826	0.74267	0.817158
CG14147	9.21193	18.9214	3.15457	NA	NA
CG14154	0.0711558	-0.0734839	1.09936	0.828194	NA
CG1416	841.555	-0.806606	0.212804	4.34601e-05	0.000235633
CG14174	45.9297	-0.966075	0.419232	0.00314196	0.0101087
CG1418	248.849	0.614084	0.211544	0.00183017	0.00635091
CG14183	63.5909	0.142409	0.526615	0.676503	0.762375
CG14184	649.113	0.0693696	0.197973	0.71048	0.792199
CG14185	32.5664	2.20429	0.923503	0.000290625	0.0012912
CG14187	0.662734	-0.0243315	1.08054	0.942602	NA
CG14194	391.962	0.167954	0.245972	0.454759	0.5762
CG14195	0.90004	-0.0937452	1.08863	0.783447	NA
CG14196	385.149	-1.20521	0.209099	4.85414e-10	7.12539e-09
CG14212	1.98478	-0.121615	0.916613	0.727101	0.805344
CG14229	57.8266	-0.927841	0.47773	0.00847709	0.0236507
CG14231	75.5001	-0.108048	0.261278	0.646873	0.73893
CG14232	321.538	0.064595	0.20319	0.735475	0.811835
CG14244	0	0	1.84404	NA	NA
CG14247	0	0	1.84404	NA	NA
CG14258	6.0489	0.694739	0.868975	0.102551	0.184582
CG14259	3812.6	-0.981856	0.16024	1.37367e-10	2.225e-09
CG14260	1.10806	-0.438379	1.12789	0.272374	0.392447
CG14269	0.851599	0.343152	1.24139	0.357992	NA
CG1427	590.588	-0.580194	0.249906	0.0104586	0.0281164
CG14270	160.237	-0.553773	0.248677	0.0141931	0.036613
CG14273	1.45918	0.470819	1.34736	0.238989	0.357101
CG14274	16.0514	2.45944	1.10181	0.000423224	0.00176926
CG14275	598.013	-1.219	0.16803	2.17876e-14	5.60083e-13
CG14282	1.81629	0.494973	1.25741	0.229022	0.34535
CG14291	446.289	1.76342	0.319369	5.76482e-10	8.35416e-09
CG14292	3.93279	-1.22436	1.55692	0.0381509	0.0832104
CG14298	71.5465	0.120837	0.33359	0.66752	0.75621
CG14300	0.475326	0.235429	1.16565	0.507445	NA
CG14305	0	0	1.84404	NA	NA
CG14309	8.72977	-2.22472	1.97718	0.00744915	0.0212299
CG14312	6.42125	0.1244	0.654344	0.71926	0.799297
CG14317	60.9541	-1.75796	2.49973	NA	NA
CG14321	7.88062	-0.421767	0.704359	0.259982	0.379035
CG14323	0	0	1.84404	NA	NA
CG14326	0	0	1.84404	NA	NA
CG14327	8.48946	-0.446715	0.803565	0.24594	0.364222
CG14329	8.49926	-2.54091	1.26197	0.000762235	0.00297468
CG14330	0	0	1.84404	NA	NA
CG14331	0.848766	-0.416489	1.24292	0.288143	NA
CG14342	9.77062	0.207669	0.561946	0.549414	0.659271
CG14346	0.142312	-0.118432	1.11177	0.728799	NA
CG14352	62.0792	-0.0448346	0.358561	0.878796	0.916026
CG14353	179.801	-0.201618	0.232798	0.347688	0.468572
CG14362	0	0	1.84404	NA	NA
CG14367	700.252	0.537914	0.293371	0.0361917	0.0797112
CG14369	0	0	1.84404	NA	NA
CG14380	0	0	1.84404	NA	NA
CG14383	0	0	1.84404	NA	NA
CG14391	0.219629	-0.0091293	1.09055	0.978378	NA
CG14397	1.27473	0.0730095	1.0759	0.830219	0.88339
CG1440	2148.36	0.0435141	0.201108	0.818364	0.874196
CG14400	2.45962	-0.556655	1.12945	0.189079	0.299777
CG14402	4.84335	-0.018744	0.954448	0.956466	0.970292
CG14407	512.138	0.163215	0.206893	0.40062	0.522465
CG1441	8892.78	0.546616	0.145086	9.87925e-05	0.000492723
CG14417	2.4143	-1.20715	1.72565	0.0423429	0.0910091
CG14427	6.19055	-0.976377	1.82041	NA	NA
CG1444	578.683	-2.00594	0.238521	7.50327e-19	2.78917e-17
CG14441	3390.82	-1.46508	0.692934	0.00138911	0.00504039
CG14448	15.3948	-5.99169	1.65432	5.42074e-06	3.7246e-05
CG14450	209.493	0.159986	0.245447	0.475686	0.594557
CG14455	0	0	1.84404	NA	NA
CG14464	1415.56	3.28566	0.594912	1.57203e-09	2.08809e-08
CG14476	7412.22	0.357203	0.17008	0.0282812	0.0649461
CG14478	784.262	-0.671953	0.153233	5.21292e-06	3.59135e-05
CG14480	391.564	-0.060843	0.195534	0.742031	0.816978
CG14482	806.565	-0.380767	0.396458	0.222053	0.337916
CG14483	302.867	-0.167	0.308287	0.531334	0.644008
CG14490	4.49491	-0.418481	0.709987	0.263828	0.383352
CG14491	0.806861	-0.342372	1.24147	0.358817	NA
CG14492	0	0	1.84404	NA	NA
CG14500	2.23643	-0.3093	1.07476	0.40777	0.530317
CG14502	12535	1.44854	0.196074	3.75075e-15	1.04758e-13
CG14505	75.8664	0.0426676	0.598286	0.901042	0.931344
CG14507	7.81391	-1.99664	1.3202	0.00371048	0.0116618
CG14508	14.8772	-0.932371	0.746205	0.0309473	0.0701029
CG14512	78.172	-0.353416	0.326885	0.20294	0.31565
CG14515	2.78521	0.146518	0.897367	0.675857	0.761881
CG14518	68.8323	-3.32429	0.665569	2.48999e-08	2.65274e-07
CG14523	345.903	2.06641	0.289739	1.7379e-14	4.48986e-13
CG14535	123.56	0.244302	0.333368	0.384988	0.506296
CG14537	0	0	1.84404	NA	NA
CG14543	64.2772	-1.00659	0.769936	0.023375	0.0553268
CG14544	20.6193	-0.129011	0.562587	0.707601	0.78967
CG14551	1.81288	0.233915	0.980343	0.517491	0.632273
CG14561	26.1263	-0.713685	0.826723	0.0913218	0.168944
CG14564	0.188136	0.062845	1.09734	0.852538	NA
CG14565	4.11797	0.650815	1.0002	0.132354	0.226426
CG14566	6.4334	-0.557546	0.722317	0.154001	0.254795
CG14567	269.004	-0.389974	0.214072	0.0508411	0.105926
CG14568	0.297159	0.174718	1.1339	0.614765	NA
CG14569	0.0711558	-0.0734839	1.09936	0.828194	NA
CG14570	0.6784	-0.306294	1.21386	0.403396	NA
CG14572	4.44505	0.263335	0.582884	0.453732	0.575039
CG14573	0	0	1.84404	NA	NA
CG14579	0.153162	0.111796	1.10941	0.743078	NA
CG14589	6.3549	-0.391483	0.854886	0.30345	0.423421
CG14590	679.732	2.63381	0.263234	4.00387e-25	2.65231e-23
CG14598	4.34953	-0.0443371	0.768439	0.897135	0.928214
CG14607	17.6264	6.00408	1.22485	4.6812e-08	4.8279e-07
CG1461	9342.3	-0.451094	0.353908	0.122661	0.21383
CG14613	238.345	1.90552	0.32136	4.95604e-11	8.62218e-10
CG14618	200.324	0.964356	0.278343	8.38311e-05	0.000425496
CG14624	0.394527	0.043728	1.08835	0.897035	NA
CG14625	58.0323	-5.12171	0.965609	1.18908e-08	1.32986e-07
CG14626	31.9649	7.50914	1.30535	7.1768e-11	1.21982e-09
CG14627	0.202415	-0.0784281	1.10041	0.816974	NA
CG14629	508.191	-1.09354	0.307188	3.57109e-05	0.000199264
CG1463	61.6053	-1.7856	0.850344	0.000914518	0.0034745
CG14636	103.351	3.84571	0.741677	1.64994e-08	1.81003e-07
CG14644	0.495265	0.251457	1.17542	0.481953	NA
CG14645	0.351268	0.19753	1.14501	0.572435	NA
CG14646	434.564	0.286718	0.182012	0.0979455	0.178387
CG14650	1060.08	0.383646	0.158022	0.0117098	0.0310599
CG14651	1.96164	-0.801608	1.51754	0.100305	0.181978
CG14657	171.448	-0.466564	0.273578	0.0556852	0.114404
CG14659	0	0	1.84404	NA	NA
CG14664	1.85726	0.0531296	0.893886	0.877397	0.915121
CG14667	173.802	0.116904	0.277043	0.635711	0.730587
CG14671	139.038	-0.156997	0.302492	0.550915	0.660612
CG14676	0	0	1.84404	NA	NA
CG14684	0.0711558	-0.0734839	1.09936	0.828194	NA
CG14687	2642.37	0.529942	0.175248	0.00151402	0.00543261
CG14695	39.5246	0.753052	0.411641	0.0190918	0.0470434
CG14701	63.231	-0.307405	0.289001	0.227141	0.343772
CG14708	0	0	1.84404	NA	NA
CG14710	151.465	-0.620207	0.265319	0.00902018	0.0249504
CG14715	140.317	-0.421817	0.337227	0.13653	0.231828
CG14720	0.099053	0.062845	1.09734	0.852538	NA
CG14722	424.059	-0.124173	0.220311	0.544716	0.655308
CG14731	0.241152	-0.157923	1.1272	0.64735	NA
CG14749	377.223	-0.360356	0.184482	0.039789	0.0862736
CG14752	5.46139	1.30571	1.82362	NA	NA
CG14757	881.624	0.258833	0.186658	0.144202	0.241913
CG14759	0	0	1.84404	NA	NA
CG14760	0.259292	-0.00429489	1.0906	0.989826	NA
CG14767	3371.3	0.995659	0.173463	1.36886e-09	1.83712e-08
CG14770	37.1909	0.0186765	0.903674	NA	NA
CG14780	1.17873	-0.290043	1.04103	0.433561	0.555535
CG14795	21.5826	-0.388379	0.462409	0.246403	0.36468
CG14803	255.477	-0.410712	0.246128	0.0672006	0.132478
CG14805	447.775	-1.97518	0.211325	1.69007e-22	9.68663e-21
CG14806	460.208	0.28831	0.223571	0.164527	0.268361
CG14812	140.577	0.470619	0.325728	0.0890818	0.165695
CG14814	241.179	-3.66342	0.925577	2.63128e-06	1.94226e-05
CG14817	198.061	-0.817631	0.215777	4.19951e-05	0.000229375
CG14818	506.367	0.369853	0.147813	0.0097239	0.0264939
CG14820	2.84947	-0.0401583	0.979008	0.90691	0.934818
CG14823	2.33367	0.354666	0.934237	0.348926	0.469526
CG14826	0	0	1.84404	NA	NA
CG14829	0.099053	0.062845	1.09734	0.852538	NA
CG14830	1519.92	-2.95525	0.432056	2.93257e-13	6.55955e-12
CG14837	416.445	-0.268573	0.297657	0.301865	0.421665
CG14839	0	0	1.84404	NA	NA
CG14851	0.142312	-0.118432	1.11177	0.728799	NA
CG14853	102.306	-0.977112	0.317505	0.000309683	0.00136763
CG14854	415.564	0.105193	0.236798	0.62916	0.725155
CG14855	6.14191	-0.227065	0.715479	0.521752	0.636124
CG14857	11.9903	0.378293	0.482143	0.266088	0.385659
CG1486	1338.84	0.264694	0.219958	0.19576	0.307632
CG14860	8.89285	-0.491193	0.601766	0.183107	0.292717
CG14870	38.2803	1.00288	0.4615	0.0038742	0.0121101
CG14879	123.15	0.372152	0.322356	0.175907	0.283062
CG14905	8.32018	0.000459148	0.575713	0.99893	0.999123
CG14913	0	0	1.84404	NA	NA
CG14915	29.4639	-1.83628	2.56238	NA	NA
CG1492	65.4954	-2.12047	0.370752	1.741e-10	2.75944e-09
CG14921	8.71148	0.151956	0.624918	0.661604	0.751354
CG14931	19.3139	-5.80253	2.00497	3.50389e-05	0.000196789
CG1494	14.4289	-6.41701	1.2798	1.77844e-08	1.9305e-07
CG14945	120.297	1.05513	0.298065	4.45761e-05	0.000240674
CG14946	168.574	-1.05544	0.28141	1.96365e-05	0.000117842
CG14958	0.0711558	-0.0734839	1.09936	0.828194	NA
CG14968	80.7604	0.507731	0.306528	0.055569	0.114211
CG14969	334.282	-1.43768	0.201355	2.4226e-14	6.18491e-13
CG14971	307.694	0.812592	0.196813	1.04623e-05	6.75736e-05
CG14985	131.324	0.634285	0.309857	0.0174739	0.0436384
CG15012	667.157	0.298801	0.182682	0.0855997	0.160426
CG15014	106.437	-0.732792	0.335838	0.00940155	0.0257707
CG15019	225.867	-2.17933	0.275583	4.97856e-17	1.6704e-15
CG15024	0	0	1.84404	NA	NA
CG15027	121.821	0.187581	0.264101	0.430206	0.552267
CG15034	1.20889	-0.427737	1.3138	0.272868	0.392951
CG15035	0	0	1.84404	NA	NA
CG15036	314.875	2.91032	0.277834	4.61911e-27	3.31485e-25
CG1504	21.6531	0.204717	0.596323	0.557529	0.667304
CG15044	1.98957	-0.064192	0.900362	0.852337	0.897076
CG15073	162.143	0.441187	0.21732	0.0290948	0.0664601
CG15080	408.179	5.24551	0.609243	1.17527e-18	4.30683e-17
CG15082	5.17602	-0.294691	0.855541	0.421635	0.543351
CG15083	600.386	0.616888	0.22503	0.00297415	0.0096287
CG15084	83.6249	-1.17023	0.296228	5.58117e-06	3.82465e-05
CG15087	474.961	1.43734	0.236199	3.14401e-11	5.60175e-10
CG15093	494.414	0.908236	0.251277	5.93239e-05	0.000309623
CG15096	1145.63	-1.63281	0.485898	1.7958e-05	0.000108398
CG15097	53.6311	0.368115	0.310734	0.169712	0.275121
CG15098	6417.96	0.896167	0.20633	2.97364e-06	2.16101e-05
CG15099	3201.31	0.376015	0.210323	0.0559341	0.11482
CG15100	459.553	-0.180817	0.192171	0.320377	0.440497
CG15109	0.947315	0.367575	1.26128	0.33081	NA
CG15111	867.695	0.999098	0.169853	5.77208e-10	8.35416e-09
CG15115	0.848609	-0.257509	1.14605	0.475774	NA
CG15116	0.0711558	-0.0734839	1.09936	0.828194	NA
CG15117	604.311	2.06163	0.268179	2.70716e-16	8.5292e-15
CG15120	44.6834	0.0776109	0.309042	0.771519	0.839568
CG15125	0.099053	0.062845	1.09734	0.852538	NA
CG15127	0.099053	0.062845	1.09734	0.852538	NA
CG15128	1.47785	0.12876	0.912283	0.712197	0.793943
CG15130	2.70768	0.030104	0.849844	0.930143	0.950375
CG15136	0	0	1.84404	NA	NA
CG15141	200.154	-0.0884659	0.364341	0.765618	0.834412
CG15142	0.426935	-0.238185	1.16842	0.502857	NA
CG15147	0	0	1.84404	NA	NA
CG15152	1.73551	0.0089266	1.06148	0.979001	0.985961
CG15153	0	0	1.84404	NA	NA
CG15155	3.53078	1.39953	1.73112	0.0287808	0.0658593
CG1516	2921.86	-0.322141	0.19109	0.0749853	0.144148
CG15161	180.523	-0.0818534	0.250074	0.719321	0.799297
CG15167	0.153162	0.111796	1.10941	0.743078	NA
CG15168	347.603	0.704193	0.194063	0.000113951	0.000561815
CG1518	1830.52	0.0553413	0.295367	0.830687	0.883528
CG15198	0	0	1.84404	NA	NA
CG15201	2869.72	1.49099	0.255602	1.31546e-10	2.13741e-09
CG15202	1657.84	0.112417	0.193402	0.539102	0.650827
CG15208	0.241152	-0.157923	1.1272	0.64735	NA
CG15209	951.953	2.66902	0.192689	3.74627e-45	4.83924e-43
CG15210	52.0835	2.71694	0.728371	3.23708e-06	2.3393e-05
CG15211	354.568	1.17262	0.296416	5.40487e-06	3.71864e-05
CG15213	3.77491	-0.0832031	0.777516	0.809121	0.867731
CG15219	0.0711558	-0.0734839	1.09936	0.828194	NA
CG15221	0.0765811	0.062845	1.09734	0.852538	NA
CG15227	0	0	1.84404	NA	NA
CG15247	895.098	-0.876391	0.330398	0.00166892	0.0058862
CG15249	6.74317	0.23442	0.756113	0.510453	0.625892
CG15255	15.1943	-3.64771	2.16784	0.00108846	0.00405778
CG15258	0	0	1.84404	NA	NA
CG15262	0	0	1.84404	NA	NA
CG15263	0	0	1.84404	NA	NA
CG15269	1.79138	-0.605972	1.12331	0.162043	0.265044
CG15279	386.47	-1.11006	0.241478	3.81492e-07	3.29076e-06
CG15283	0	0	1.84404	NA	NA
CG15296	6.40315	-3.18951	2.05724	0.00179184	0.00623046
CG15309	1085.62	-0.801586	0.851236	0.0666444	0.131532
CG15317	53.5122	0.961977	0.417459	0.00318617	0.0102254
CG1532	1673.36	0.311063	0.180697	0.0706935	0.138099
CG15322	17.1082	-0.105815	0.572604	0.758244	0.828424
CG15330	0.361728	-0.206909	1.15078	0.555636	NA
CG15337	6.36811	-2.79627	1.64219	0.00155589	0.00556353
CG15347	123.736	3.10637	0.840758	4.69077e-06	3.28978e-05
CG15357	0	0	1.84404	NA	NA
CG15358	0	0	1.84404	NA	NA
CG15369	27.6969	4.00792	1.0265	3.75122e-06	2.68085e-05
CG15370	5.07508	0.887108	1.26549	0.0752335	0.14451
CG15373	2.96285	-0.137466	0.82624	0.69327	0.777371
CG15387	21.5296	0.194168	0.419481	0.542796	0.653607
CG15390	57.5343	0.154972	0.338868	0.585484	0.692106
CG15394	258.985	-0.602044	0.434209	0.0674577	0.132884
CG15395	0	0	1.84404	NA	NA
CG15398	0	0	1.84404	NA	NA
CG15399	5.67282	0.967611	1.25682	0.05934	0.120289
CG15403	0	0	1.84404	NA	NA
CG15404	0	0	1.84404	NA	NA
CG15414	117.227	5.23568	0.5468	1.70599e-22	9.68663e-21
CG1542	173.851	-0.55288	0.307562	0.0374689	0.0819478
CG15422	0.439258	-0.0176552	1.08551	0.958267	NA
CG15423	0.340418	0.019497	1.08709	0.953903	NA
CG15425	0	0	1.84404	NA	NA
CG15429	0	0	1.84404	NA	NA
CG15432	529.946	-3.27307	0.59048	1.38629e-09	1.8509e-08
CG15434	3.63835	1.04379	1.7484	0.0579423	0.118148
CG15435	102.667	-0.0456568	0.253171	0.84268	0.891748
CG15439	279.396	0.407169	0.18901	0.0229563	0.0545106
CG15440	214.106	-0.313365	0.2646	0.187893	0.298297
CG15445	481.502	0.0498896	0.225343	0.811336	0.869385
CG15450	0	0	1.84404	NA	NA
CG15452	0	0	1.84404	NA	NA
CG15458	0	0	1.84404	NA	NA
CG15461	1.44757	0.0907091	1.03039	0.792243	0.855146
CG15471	0	0	1.84404	NA	NA
CG15475	2.90665	-2.09248	1.9926	0.00943719	0.0258547
CG15479	19.999	-7.06048	1.16193	2.09506e-11	3.89394e-10
CG15480	3.87031	-0.714615	1.51456	NA	NA
CG15483	0	0	1.84404	NA	NA
CG15485	0.0711558	-0.0734839	1.09936	0.828194	NA
CG15497	93.3177	-7.29525	0.817347	5.96058e-21	2.74985e-19
CG1550	383.215	0.043862	0.220705	0.830862	0.883528
CG15506	172.805	1.57411	0.319872	1.87605e-08	2.02794e-07
CG15515	21.6311	-5.93758	1.0462	9.32486e-10	1.2952e-08
CG1552	1.03524	-0.341723	1.17052	0.365584	0.487603
CG15522	10.7947	0.00360271	0.586856	0.991611	0.993162
CG15525	101.767	-0.0726982	0.237634	0.739327	0.814695
CG15536	65.9849	-2.03554	0.805786	0.000206809	0.000951543
CG15537	9.1944	3.83076	2.07861	0.000743199	0.00290697
CG15543	0	0	1.84404	NA	NA
CG15545	62.112	-4.0516	0.996108	2.16604e-06	1.63386e-05
CG15548	0	0	1.84404	NA	NA
CG15549	0	0	1.84404	NA	NA
CG15550	4.09861	-0.351039	0.849825	0.348346	0.468969
CG15554	1.59837	-0.749244	1.45154	0.114434	0.202562
CG15556	784.357	1.32145	0.212326	1.83315e-11	3.48232e-10
CG15561	1444.57	0.0373932	0.624779	0.913247	0.938338
CG15571	8.5439	-2.83806	2.46899	NA	NA
CG15576	0	0	1.84404	NA	NA
CG15577	0.755557	-0.330693	1.2323	0.372668	NA
CG15579	2.93654	-2.09975	1.99705	0.00935387	0.0256536
CG15594	0.396212	0.214386	1.15378	0.542708	NA
CG15602	248.039	-0.883815	0.247853	7.82513e-05	0.00039953
CG15605	0	0	1.84404	NA	NA
CG15614	1.00232	0.149551	0.962544	0.670122	0.757166
CG15615	19.8708	6.31347	1.63923	2.10599e-06	1.59555e-05
CG15617	0.943086	-0.264804	1.18064	0.461985	NA
CG15618	144.212	-0.62081	0.264194	0.00872614	0.0242278
CG15625	7.11562	0.204694	0.657313	0.559991	0.669785
CG15628	23381	-1.88035	0.690824	0.000124731	0.000604597
CG15629	101.8	-0.313998	0.314656	0.245724	0.364111
CG15638	1.41601	0.451451	1.33475	0.253288	0.371906
CG15641	0	0	1.84404	NA	NA
CG15642	28.262	0.517661	0.501652	0.138594	0.234484
CG15643	50.8363	-0.422197	0.46199	0.208475	0.321933
CG15649	0.895786	0.222278	1.15243	0.529815	NA
CG15651	71.7722	0.577698	0.348874	0.0460645	0.0977075
CG15653	37.9771	-1.2081	0.726335	0.00722298	0.020688
CG15657	1.76301	0.0147049	1.06146	0.965421	0.976572
CG15673	1089.18	-1.62804	0.267558	2.23913e-11	4.132e-10
CG15696	0.788293	-0.382412	1.2269	0.319787	NA
CG15704	0	0	1.84404	NA	NA
CG15706	299.081	-1.8312	0.272164	2.89941e-13	6.51358e-12
CG1571	10.1699	-2.55569	1.61749	0.00230415	0.00779108
CG15710	0.099053	0.062845	1.09734	0.852538	NA
CG15711	0	0	1.84404	NA	NA
CG15712	0.198106	0.132603	1.11621	0.698915	NA
CG15715	297.019	-0.195516	0.220041	0.339607	0.460806
CG15717	88.405	-1.31875	0.400485	4.58289e-05	0.000246535
CG15719	1.41951	-0.464519	1.34719	0.243112	0.360861
CG1572	866.459	0.0949214	0.194645	0.60611	0.708425
CG15728	0.0711558	-0.0734839	1.09936	0.828194	NA
CG15734	6.86882	-3.58308	2.30229	0.00138666	0.00503504
CG15735	663.583	0.615213	0.147446	1.56117e-05	9.64902e-05
CG15739	7.83819	0.462916	0.677549	0.218557	0.334603
CG15743	339.095	1.01728	0.223044	6.64781e-07	5.46962e-06
CG15747	252.292	-0.00562899	0.225113	0.978496	0.985937
CG15754	0	0	1.84404	NA	NA
CG15756	0.564409	0.263686	1.18327	0.463292	NA
CG15766	11.3387	-0.311447	0.81797	NA	NA
CG15771	4034.85	0.59638	0.572456	0.107108	0.191563
CG15772	63.3826	1.27403	0.339878	9.01319e-06	5.90256e-05
CG15773	1.98884	0.0367176	0.897654	0.914977	0.939524
CG15800	2.07142	-0.191611	0.943487	0.590036	0.695104
CG15814	512.357	-0.0853642	0.138922	0.527413	0.639855
CG1582	1257.88	-0.0772214	0.161283	0.61896	0.717699
CG15824	1.24951	-0.545585	1.33534	0.196207	0.308052
CG15829	13.3707	0.0859107	0.446199	0.792255	0.855146
CG15863	66.9845	0.322888	0.262623	0.172262	0.278324
CG15864	22.9654	-2.91783	1.22516	0.000265103	0.00118802
CG15865	0	0	1.84404	NA	NA
CG15873	0	0	1.84404	NA	NA
CG15876	5.69246	-0.912629	1.77107	NA	NA
CG15877	120.686	0.0856005	0.313955	0.751385	0.823067
CG15878	2.18418	-0.0673682	0.97406	0.845016	0.893248
CG15890	3426.93	0.572988	0.529455	0.110334	0.196315
CG15891	294.412	0.248275	0.199686	0.187065	0.297404
CG15892	19.5825	-0.413186	0.454657	0.215027	0.330274
CG15896	102.295	0.460199	0.354444	0.115644	0.204285
CG15905	1.16613	-0.361883	1.18826	0.342807	0.463808
CG15912	87.814	-0.780295	0.45502	0.0218398	0.0524379
CG15914	47.194	-0.245627	0.460174	0.458877	0.578862
CG15923	137.114	-0.569464	0.334607	0.0432411	0.0924396
CG15925	0	0	1.84404	NA	NA
CG15927	4.71933	-0.157287	0.809878	0.653036	0.744043
CG1597	605.644	0.270439	0.191651	0.13612	0.231327
CG1602	97.7792	0.248862	0.277879	0.314131	0.434336
CG1603	241.244	0.256382	0.26329	0.279629	0.399679
CG1607	1017.09	0.910072	0.147045	1.25672e-10	2.0549e-09
CG1620	734.308	-0.646421	0.149533	7.40232e-06	4.9225e-05
CG1636	1057.93	-0.794055	0.23033	0.00016784	0.000790544
CG1640	4544.86	0.089683	0.123196	0.456775	0.577479
CG1648	5261.66	0.0571288	0.173995	0.731443	0.809286
CG1662	281.195	0.248128	0.284386	0.323999	0.444255
CG1665	348.454	1.76079	0.218151	1.2155e-17	4.33138e-16
CG1667	211.234	-0.510728	0.278463	0.038676	0.0841857
CG16704	11.2622	-0.3236	0.701682	0.373559	0.495299
CG1671	286.912	0.214813	0.227531	0.307744	0.427449
CG16712	1754.52	0.610807	0.282899	0.0144067	0.0370422
CG16713	1321.32	1.80392	0.231876	1.25985e-16	4.04325e-15
CG16716	1.12855	-0.0051774	1.04294	0.987861	0.990737
CG16717	191.166	-1.18048	0.391499	0.000185321	0.00086266
CG16719	0	0	1.84404	NA	NA
CG16721	1192.55	0.672383	0.14491	1.57454e-06	1.2035e-05
CG1673	86.7969	-0.421039	0.439799	0.200051	0.312569
CG16734	109.349	1.05298	0.362742	0.000413925	0.00173472
CG16736	8.95236	2.11938	1.31299	0.00264061	0.00871825
CG16739	8.99306	-2.44884	1.33242	0.00125504	0.00461531
CG16741	0.202415	-0.0784281	1.10041	0.816974	NA
CG16743	255.587	-0.242279	0.255182	0.295004	0.415713
CG16749	6.96925	-0.380188	0.658534	0.299544	0.419785
CG16753	39.8511	-0.932023	0.672487	0.0247232	0.0580131
CG16762	0	0	1.84404	NA	NA
CG16771	276.546	0.368209	0.230674	0.0835792	0.157438
CG16782	0.142312	-0.118432	1.11177	0.728799	NA
CG16787	199.166	-0.700851	0.232907	0.00102226	0.00384987
CG16790	59.599	-0.668115	0.385653	0.0303593	0.0688917
CG16800	0	0	1.84404	NA	NA
CG16812	437.633	0.0860996	0.22149	0.675917	0.761881
CG16826	2.39373	0.149794	1.02064	0.668886	0.756997
CG16833	732.554	0.322558	0.272958	0.185753	0.29602
CG16836	16.5058	0.506897	0.767505	0.193621	0.304919
CG16837	0	0	1.84404	NA	NA
CG16854	0.099053	0.062845	1.09734	0.852538	NA
CG16865	113.469	0.215289	0.333369	0.443923	0.564818
CG16879	0.83547	0.115027	1.097	0.736961	NA
CG1688	108.899	0.000277395	0.36	0.999249	0.999249
CG16890	105.671	-0.560871	0.312046	0.0366903	0.0805518
CG16892	145.697	-0.130357	0.358203	0.657375	0.747738
CG16894	0	0	1.84404	NA	NA
CG16896	221.097	-0.560139	0.284209	0.025459	0.0594003
CG16898	0.372624	-0.0660331	1.0959	0.845298	NA
CG1690	0	0	1.84404	NA	NA
CG16926	16.2366	0.41205	0.652488	0.263986	0.383458
CG16935	989.923	0.725049	0.147295	3.34101e-07	2.92098e-06
CG16947	200.036	0.343844	0.202424	0.0708178	0.138238
CG16952	1110.04	0.642477	0.182485	0.000203948	0.000940053
CG16956	6.87284	-1.03499	1.87008	NA	NA
CG16957	0.382905	0.212191	1.15261	0.546505	NA
CG16959	72.2044	-0.202215	0.371441	0.500566	0.617138
CG16972	670.996	0.414732	0.20685	0.0323668	0.0728077
CG16974	3794.03	0.965197	0.173854	4.64189e-09	5.60389e-08
CG16979	477.974	0.401094	0.15826	0.00848657	0.0236644
CG1698	246.919	-0.775792	0.303359	0.00310128	0.00999646
CG16985	187.14	0.517956	0.249455	0.0222187	0.0531009
CG16986	188.003	0.312548	0.217772	0.123263	0.214415
CG16995	0	0	1.84404	NA	NA
CG17003	0.202415	-0.0784281	1.10041	0.816974	NA
CG17005	0.202415	-0.0784281	1.10041	0.816974	NA
CG17010	0.826713	-0.348977	1.24674	0.351224	NA
CG1703	3450.14	0.774049	0.421608	0.0175823	0.0438667
CG17036	116.577	0.535358	0.289916	0.0354518	0.0785167
CG17047	2.87254	0.63745	1.51321	NA	NA
CG17048	0	0	1.84404	NA	NA
CG17059	229.966	0.167193	0.252669	0.466525	0.585935
CG17065	440.59	-0.420769	0.188521	0.0184799	0.0457526
CG1707	439.486	-0.374274	0.232215	0.0802677	0.152144
CG17075	411.822	0.259863	0.390216	0.399632	0.52144
CG17083	0	0	1.84404	NA	NA
CG17119	159.287	-0.251165	0.274646	0.305353	0.42494
CG17121	769.869	-0.591632	0.207509	0.00227587	0.00770797
CG17122	42.4349	-1.5412	0.610279	0.000365764	0.00156865
CG17124	176.643	-0.98918	0.292291	0.000102164	0.000509048
CG17127	321.685	-0.297018	0.348654	0.304664	0.424542
CG17154	0	0	1.84404	NA	NA
CG17163	54.1126	0.270007	0.362171	0.361731	0.483587
CG17168	577.006	-0.229973	0.209111	0.240507	0.359058
CG17180	115.006	0.23355	0.219551	0.253	0.371805
CG17186	69.8897	-0.403373	0.36703	0.176867	0.284429
CG17187	85.7478	-0.711184	0.286003	0.00464856	0.0141455
CG17190	86.0935	-0.725924	0.35449	0.0131129	0.0342164
CG17193	0.175634	0.122528	1.11274	0.720101	NA
CG17199	0	0	1.84404	NA	NA
CG17202	142.424	-0.750703	0.331063	0.00720194	0.0206506
CG17209	317.797	0.14007	0.16318	0.372119	0.494404
CG1722	719.038	-5.27434	0.799775	5.6938e-12	1.1359e-10
CG17230	124.14	-0.910921	0.263756	0.000107139	0.000530766
CG17234	0	0	1.84404	NA	NA
CG17237	0	0	1.84404	NA	NA
CG17242	0	0	1.84404	NA	NA
CG17244	2.30193	0.0725545	0.996382	0.833143	0.885085
CG17249	190.567	0.250599	0.277244	0.309919	0.429669
CG17258	7.02392	-0.733387	0.711135	0.0716812	0.139449
CG17259	743.692	-0.0932758	0.151271	0.523782	0.637846
CG17264	18.3694	-3.15142	0.971667	2.20097e-05	0.000130868
CG17266	46.467	-1.03755	0.488837	0.00393107	0.0122513
CG17272	217.291	0.746391	0.203876	8.8306e-05	0.000446455
CG17283	0	0	1.84404	NA	NA
CG17287	0	0	1.84404	NA	NA
CG17294	223.69	-0.0732505	0.202453	0.700721	0.783516
CG17300	0.099053	0.062845	1.09734	0.852538	NA
CG17321	190.152	0.384844	0.371826	0.200944	0.313489
CG17325	1631.73	-4.1506	0.198224	6.11322e-98	3.94838e-95
CG17327	191.736	-1.11986	0.254262	9.10218e-07	7.28034e-06
CG17328	89.0647	0.236381	0.277516	0.338569	0.459639
CG17329	1.65075	-0.465453	1.24665	0.249713	0.368017
CG17349	0	0	1.84404	NA	NA
CG17350	747.759	0.898575	0.25639	9.30178e-05	0.000468443
CG1737	1495.22	-0.412712	0.185328	0.018972	0.0468139
CG17378	246.05	-0.309609	0.310715	0.248245	0.36669
CG1738	46.8204	-0.240922	0.352662	0.408243	0.530398
CG17385	534.388	-0.471946	0.238938	0.0310395	0.0702704
CG17386	65.8177	-0.993755	0.41821	0.00237066	0.00798515
CG17404	0	0	1.84404	NA	NA
CG17454	1478.96	0.631797	0.455824	0.0615158	0.123726
CG1746	14184.7	-0.0392381	0.255569	0.865573	0.906081
CG17470	12.2742	-0.935541	1.14494	0.0589482	0.119868
CG17475	0	0	1.84404	NA	NA
CG17493	967.096	1.09487	0.184615	2.83245e-10	4.34282e-09
CG17528	1109.79	0.300095	0.202429	0.114976	0.203313
CG17544	228.491	-0.274533	0.298434	0.292159	0.413246
CG17564	0.670866	0.0248403	1.08064	0.941405	NA
CG17568	163.12	0.251396	0.277054	0.308128	0.427868
CG17570	0.198106	0.132603	1.11621	0.698915	NA
CG17572	816.815	-0.356158	0.219519	0.0809888	0.153117
CG17580	0	0	1.84404	NA	NA
CG17593	1106.12	0.336994	0.184402	0.0544727	0.11248
CG17597	634.168	-0.101251	0.196452	0.585381	0.692106
CG17598	1138.44	0.872909	0.181153	3.39275e-07	2.95124e-06
CG17599	526.274	1.81518	0.288409	5.2087e-12	1.0513e-10
CG17625	0.099053	0.062845	1.09734	0.852538	NA
CG17633	4.87441	0.305194	0.981744	NA	NA
CG17636	0.0711558	-0.0734839	1.09936	0.828194	NA
CG1764	216.828	0.682672	0.20336	0.000331488	0.0014503
CG17648	0	0	1.84404	NA	NA
CG17650	5.32548	-2.93316	2.27022	0.00325284	0.01042
CG17652	75.565	-1.09471	0.339287	0.000120596	0.000588961
CG17658	14.5198	0.465852	0.684955	0.216939	0.332817
CG17669	13.5983	-0.715145	0.566013	0.0563628	0.115474
CG17672	1.68821	0.358959	1.2509	0.340508	0.461544
CG17680	214.993	-0.799273	0.30486	0.00239039	0.00803588
CG17681	4.885	4.31118	1.73524	0.000172738	0.000808456
CG17683	1410.96	0.77651	0.176879	3.71122e-06	2.65594e-05
CG17707	10.9831	1.74518	0.996582	0.00247778	0.00828118
CG17717	14.2061	-4.90454	1.39356	1.26159e-05	7.99834e-05
CG17737	996.2	0.560655	0.192088	0.00198426	0.00683966
CG17738	0.693732	-0.258143	1.0709	0.478843	NA
CG17754	2480.21	-1.60245	0.778964	0.00129739	0.00474424
CG17760	28.7899	0.671668	0.505658	0.0590125	0.119905
CG17765	687.01	-0.508406	0.198315	0.00643805	0.0187516
CG17776	178.002	0.304377	0.239814	0.16631	0.270713
CG17778	30.5263	-0.0609962	0.517887	0.857175	0.900574
CG17780	0	0	1.84404	NA	NA
CG17784	0	0	1.84404	NA	NA
CG17819	2.24642	-0.00591159	0.919315	0.986269	0.989909
CG17821	2.68061	0.0968924	0.989494	0.779535	0.845441
CG17829	142.931	-0.981493	0.326987	0.000390779	0.00165776
CG17834	702.742	0.0848685	0.220963	0.67968	0.765288
CG17840	300.978	-0.241195	0.205166	0.210707	0.324844
CG17843	664.214	-0.160486	0.212933	0.42018	0.542361
CG1785	341.645	0.121678	0.26555	0.610471	0.71139
CG17855	4.03992	-0.404584	0.913425	0.294061	0.414914
CG1789	226.819	-0.303811	0.174369	0.0682916	0.134219
CG17896	1645.57	-0.0476198	0.117897	0.680255	0.765768
CG17904	338.2	-0.925189	0.266023	9.28288e-05	0.000467948
CG17917	1.13039	0.408136	1.29594	0.290453	0.411509
CG17919	5748.56	-0.647693	0.172974	8.52018e-05	0.000431183
CG17944	0	0	1.84404	NA	NA
CG17959	0.604446	-0.288596	1.20114	0.427262	NA
CG17982	942.879	-3.79961	0.645781	3.75973e-10	5.63088e-09
CG17985	221.061	-0.366903	0.237697	0.0926319	0.170939
CG17994	73.9017	0.698	0.355481	0.017268	0.0432077
CG17996	161.885	0.0765592	0.280897	0.75886	0.828674
CG18011	230.368	-0.303035	0.241011	0.169935	0.275299
CG18031	16.5725	-4.2316	0.969737	7.72389e-07	6.30479e-06
CG18063	0	0	1.84404	NA	NA
CG1809	15.4317	-0.74321	0.764322	0.0747304	0.143918
CG18095	0.252215	0.15852	1.12657	0.646244	NA
CG1812	310.585	-0.349151	0.239577	0.111908	0.198636
CG18132	0	0	1.84404	NA	NA
CG18135	4080.72	-1.76603	0.24107	4.11193e-15	1.14228e-13
CG18136	329.802	-0.033491	0.227964	0.873917	0.912597
CG18155	30.6452	-0.902545	0.576367	0.0195841	0.0480034
CG18179	0	0	1.84404	NA	NA
CG18190	53.5886	-2.94128	1.59501	0.001057	0.00395764
CG18268	33.6095	1.22086	0.546193	0.001729	0.00605676
CG18269	4.62513	-0.805509	1.67911	NA	NA
CG18273	377.184	0.135698	0.251538	0.553148	0.662982
CG18278	277.623	0.220838	0.248479	0.329532	0.45009
CG18292	209.739	-0.162578	0.261072	0.490288	0.607716
CG1835	48.5229	-2.51983	1.11985	0.000397067	0.00167481
CG18371	14.1459	-1.45954	1.13539	0.0108019	0.028934
CG1840	155.329	1.45877	0.448884	3.76893e-05	0.000207612
CG18418	0	0	1.84404	NA	NA
CG18446	85.7314	-0.939792	0.656896	0.0224059	0.0534741
CG18449	0	0	1.84404	NA	NA
CG18467	32.8609	-0.970554	0.717222	0.0236148	0.0558689
CG1847	168.728	-0.365531	0.241424	0.098118	0.178638
CG18473	26.8046	-0.466176	0.6928	0.217623	0.33337
CG18480	2.04166	-0.080246	0.985031	0.816139	0.872237
CG1850	35.1809	-7.79395	1.25323	2.62681e-12	5.40746e-11
CG18507	1189.72	-0.515747	0.161906	0.00090803	0.00345493
CG18536	3791.72	0.0214591	0.17168	0.896173	0.927961
CG18537	2231.28	-0.914868	0.160881	2.62203e-09	3.29636e-08
CG18539	3274.36	2.77123	0.282153	2.98008e-24	1.901e-22
CG18568	1.01184	0.27361	1.18576	0.449094	0.57028
CG18577	0	0	1.84404	NA	NA
CG18599	0	0	1.84404	NA	NA
CG18609	0.779888	0.0653779	1.08312	0.847275	NA
CG18622	182.651	-0.739969	0.194001	4.93399e-05	0.000263639
CG18624	803.786	0.129459	0.372998	0.666851	0.756116
CG18643	45.341	-0.232253	0.367412	0.436418	0.558024
CG18661	124.9	0.784521	0.30009	0.00256801	0.00854957
CG18662	3.3815	1.3476	1.45919	0.0260317	0.0605337
CG18666	0.604446	-0.288596	1.20114	0.427262	NA
CG18731	216.653	-0.508166	0.29734	0.0501446	0.104686
CG18766	390.178	0.417312	0.16045	0.00684407	0.0197781
CG18808	3.80145	-0.791837	1.29562	0.099916	0.181464
CG18810	1.11632	0.473828	1.2878	0.24181	0.359933
CG18812	6147.08	0.834294	0.254556	0.000266915	0.0011951
CG1885	304.713	-0.0486221	0.318251	0.858491	0.90159
CG18858	1008.67	-0.0390162	0.143996	0.780058	0.845441
CG18869	8.01731	0.325799	0.550418	0.353739	0.474992
CG1888	303.975	-0.0898116	0.272992	0.712862	0.794512
CG1890	269.228	0.60626	0.264281	0.0104733	0.0281411
CG1902	1190.88	1.31078	0.305761	7.84305e-07	6.39196e-06
CG1907	772.491	-0.294742	0.159608	0.0551318	0.113402
CG1909	339.062	-2.30051	0.38822	5.49395e-11	9.46241e-10
CG1927	2706.64	-0.127455	0.18121	0.460442	0.579845
CG1943	600.825	0.345446	0.318297	0.205109	0.317781
CG1951	420.543	-0.361291	0.214169	0.070609	0.137987
CG1958	0	0	1.84404	NA	NA
CG1968	410.49	-0.617049	0.239878	0.00484357	0.0146698
CG1970	8272.3	0.284104	0.194351	0.121976	0.212923
CG1971	19.6651	-0.793324	0.742575	0.0579863	0.118191
CG1983	192.373	-0.466173	0.228069	0.0268211	0.0620621
CG1986	0.99053	0.380032	1.27173	0.317802	0.437655
CG1988	0.202415	-0.0784281	1.10041	0.816974	NA
CG1998	620.113	0.912313	0.198716	8.83331e-07	7.08722e-06
CG2004	558.809	0.630848	0.202591	0.000885261	0.00337575
CG2006	49.0506	0.460979	0.363686	0.120865	0.211554
CG2021	73.6014	0.149042	0.423796	0.641525	0.734654
CG2023	162.932	0.487257	0.186234	0.00578061	0.0170872
CG2025	784.978	0.841176	0.184653	1.37204e-06	1.06287e-05
CG2034	158.047	-1.06255	0.440876	0.00172182	0.00603982
CG2051	409.102	0.124219	0.197822	0.505899	0.621931
CG2053	1.60131	-0.0385004	0.916418	0.910888	0.937002
CG2059	432.617	-0.301684	0.190875	0.0951324	0.174618
CG2061	179.864	-0.132455	0.234384	0.53968	0.651372
CG2063	312.603	-0.922406	0.247103	3.55025e-05	0.00019853
CG2064	372.619	0.25295	0.183078	0.146477	0.245013
CG2076	1835.38	-0.231721	0.195228	0.209117	0.322757
CG2107	730.859	0.0805557	0.183382	0.644442	0.737015
CG2111	23.6594	-0.0590139	0.620395	0.86364	0.905046
CG2113	1.17679	-0.423163	1.30972	0.276849	0.397245
CG2124	61.8821	0.40586	0.351944	0.163334	0.266819
CG2129	109.986	0.259969	0.219035	0.202254	0.314773
CG2135	782.305	0.440221	0.317646	0.105705	0.189555
CG2144	459.28	-0.1751	0.197224	0.347023	0.468042
CG2145	1140.83	-1.23528	0.398115	0.00011556	0.000568666
CG2150	6.5096	1.02752	1.75714	NA	NA
CG2200	174.536	-2.38362	0.289273	3.69769e-18	1.3268e-16
CG2201	2795.72	0.825549	0.139427	9.13852e-10	1.27274e-08
CG2224	235.133	0.395001	0.212444	0.0464664	0.098358
CG2254	25722	-0.376166	0.173425	0.0232357	0.0550477
CG2263	400.303	0.188251	0.212468	0.343406	0.464433
CG2267	0	0	1.84404	NA	NA
CG2291	0	0	1.84404	NA	NA
CG2316	2921.33	-0.161921	0.235456	0.455079	0.576322
CG2321	56.2716	-1.30354	0.401882	5.72635e-05	0.000300082
CG2336	0.40483	-0.191936	1.143	0.582517	NA
CG2444	18.1087	0.257692	0.599298	0.464594	0.584078
CG2453	228.272	-0.346629	0.268701	0.149966	0.250163
CG2493	1223.74	0.0604843	0.235131	0.780035	0.845441
CG2533	2.15504	0.0717222	0.989242	0.835095	0.88657
CG2540	114.883	-1.11265	0.252018	8.91834e-07	7.14435e-06
CG2543	28.2594	-0.807793	0.509361	0.0253229	0.0591517
CG2556	81.0592	0.313695	0.493975	0.357693	0.479305
CG2574	0	0	1.84404	NA	NA
CG2577	0	0	1.84404	NA	NA
CG2604	10742	-0.223214	0.200904	0.238131	0.356026
CG2608	170.253	-1.41601	0.297485	5.97408e-08	6.04072e-07
CG2611	67.2904	0.701282	0.36732	0.0191807	0.0472162
CG2614	258.716	0.262302	0.224069	0.206943	0.31995
CG2617	30.2167	-1.98155	0.689335	6.93979e-05	0.000357151
CG2680	62.5574	2.21165	0.436792	6.51427e-09	7.72001e-08
CG2681	5.05386	-0.91482	0.952402	0.0500072	0.104441
CG2685	244.054	-0.506506	0.186508	0.00415791	0.01288
CG2691	725.086	-0.298177	0.218713	0.14298	0.240316
CG2701	593.239	-0.0381327	0.215146	0.849473	0.895761
CG2712	102.785	0.141292	0.236444	0.516013	0.631212
CG2750	17.7207	-6.57253	1.38069	4.86847e-08	5.00107e-07
CG2765	801.198	0.541179	0.2452	0.0153665	0.0390935
CG2772	3.15112	-0.513354	1.0013	0.209295	0.322911
CG2789	1816.44	-1.27911	0.26293	5.31049e-08	5.40144e-07
CG2794	127.888	-0.2764	0.237154	0.204694	0.317519
CG2807	1447.55	0.416544	0.213107	0.0362078	0.0797128
CG2811	298.629	0.613678	0.210909	0.00179342	0.00623175
CG2816	62.0862	-1.28716	0.459113	0.000269648	0.00120317
CG2818	577.901	0.2948	0.234399	0.171917	0.277853
CG2837	147.037	0.655039	0.418311	0.0427829	0.091659
CG2852	3232.66	1.53191	0.210072	6.48762e-15	1.77363e-13
CG2854	7.96608	3.13733	1.50366	0.000559004	0.00226895
CG2862	802.496	-0.397712	0.233911	0.0646164	0.128428
CG2875	171.191	-0.58491	0.276109	0.0170289	0.0427336
CG2889	225.803	-0.243607	0.250964	0.285917	0.406307
CG2898	24.7217	0.0576492	0.606194	NA	NA
CG2901	1.277	-0.228685	0.90433	0.524731	0.638178
CG2906	104.218	0.563319	0.258856	0.0156916	0.039803
CG2909	336.975	-0.0543816	0.311228	0.839542	0.889464
CG2911	73.9471	-1.64434	0.600793	0.000157643	0.000745234
CG2918	7770.81	0.0725265	0.32639	0.793699	0.856163
CG2921	355.724	0.272329	0.174389	0.102318	0.184465
CG2924	2595.76	1.83836	0.714642	0.000209809	0.000961264
CG2926	15668.4	0.365752	0.525004	0.294713	0.415493
CG2931	187.613	-0.112397	0.246606	0.617703	0.717182
CG2938	627.098	0.213305	0.221519	0.300203	0.420147
CG2964	0.273571	-0.137326	1.11886	0.689046	NA
CG2972	405.121	0.153675	0.234403	0.47674	0.595147
CG2990	37.9963	-0.664362	0.500096	0.0603825	0.121969
CG2991	4405.34	0.699415	0.54371	0.0573564	0.117139
CG30008	15.4051	-0.129266	0.588157	0.708037	0.789816
CG30015	3659.89	-0.397945	0.230899	0.0616125	0.123872
CG30016	2.88346	-0.791701	1.33068	0.101182	0.182928
CG30022	638.224	0.653914	0.231415	0.00208471	0.00715253
CG30026	65.8614	-0.403369	0.321108	0.141273	0.238237
CG30033	0.269262	0.0633257	1.09434	0.851552	NA
CG30051	89.8949	0.0790569	0.268258	0.742656	0.817158
CG30053	70.0989	1.62034	0.521916	4.67512e-05	0.000251105
CG30065	0	0	1.84404	NA	NA
CG3008	683.659	0.0597734	0.247448	0.791265	0.854725
CG30080	0.099053	0.062845	1.09734	0.852538	NA
CG30083	0.675602	-0.310215	1.21676	0.398291	NA
CG30093	0.40483	-0.191936	1.143	0.582517	NA
CG30096	53.7313	-0.878795	0.456431	0.0103185	0.0278122
CG30098	0	0	1.84404	NA	NA
CG30099	2.94639	-1.53207	1.89302	0.0238077	0.056171
CG30101	217.074	3.50413	0.646078	3.48441e-09	4.29688e-08
CG30105	57.5402	0.55732	0.375599	0.0661087	0.130675
CG3011	559.674	-0.529537	0.187981	0.00291848	0.00949607
CG30118	4811.64	0.754323	0.134221	6.90345e-09	8.10684e-08
CG30122	3866.33	0.888892	0.244693	5.95625e-05	0.000310554
CG30148	66.2659	-0.969125	0.517694	0.0086743	0.0241228
CG30152	409.799	-0.499618	0.187254	0.00485261	0.01468
CG30154	19.7824	0.138244	0.580087	0.688793	0.772854
CG3016	470.016	-0.243899	0.183048	0.161432	0.264381
CG30172	11.7563	0.109875	0.490815	0.74352	0.817546
CG30178	0	0	1.84404	NA	NA
CG30183	327.038	0.246815	0.217539	0.223359	0.33944
CG30184	0	0	1.84404	NA	NA
CG30192	0	0	1.84404	NA	NA
CG30197	3155.46	-0.179021	0.192065	0.324977	0.445045
CG3021	212.069	0.181967	0.177825	0.283684	0.404246
CG30222	0.188136	0.062845	1.09734	0.852538	NA
CG30268	0	0	1.84404	NA	NA
CG30275	1.7032	0.496004	1.37563	0.220671	0.336929
CG30291	666.367	-0.0992151	0.200853	0.60011	0.703891
CG3032	69.6065	1.09127	0.286096	1.32158e-05	8.31743e-05
CG30324	0	0	1.84404	NA	NA
CG30343	0.586846	-0.287678	1.2005	0.428536	NA
CG30349	526.034	0.172437	0.229414	0.416243	0.538355
CG30350	1.84123	-0.330706	1.22573	0.373387	0.495198
CG30355	0.153162	0.111796	1.10941	0.743078	NA
CG30357	45.3857	-8.27846	1.1905	8.24473e-15	2.21878e-13
CG3036	1675.58	0.149813	0.16769	0.35185	0.472824
CG30369	0	0	1.84404	NA	NA
CG30373	300.708	-0.567089	0.282235	0.0229481	0.0545106
CG30376	0	0	1.84404	NA	NA
CG30377	645.519	-0.00273977	0.502912	0.99351	0.994857
CG3038	102.842	-1.44183	0.486668	0.000108071	0.00053487
CG30382	2926.1	-1.35418	0.177245	7.0366e-16	2.1262e-14
CG30383	3.74757	-2.71887	1.83762	0.00267044	0.00878304
CG30391	0	0	1.84404	NA	NA
CG30392	284.247	0.202693	0.2527	0.377347	0.499041
CG30398	372.87	11.6546	1.08664	1.76132e-30	1.46786e-28
CG3040	284.833	0.410785	0.187027	0.0205523	0.0499158
CG30401	0.734352	-0.282782	1.07607	0.443175	NA
CG30411	1.8631	0.18252	1.04126	0.605805	0.708425
CG30412	0	0	1.84404	NA	NA
CG30413	10.3015	19.2409	3.08524	NA	NA
CG30417	0	0	1.84404	NA	NA
CG30423	588.707	-0.091423	0.192933	0.616699	0.716467
CG30428	206.718	0.219869	0.323524	0.425191	0.546916
CG30429	0	0	1.84404	NA	NA
CG30431	1.54347	-0.0229968	0.907048	0.946648	0.96343
CG30432	0.142312	-0.118432	1.11177	0.728799	NA
CG3045	91.1049	-0.0713159	0.285442	0.777528	0.843478
CG30479	4.73369	-0.149428	0.741166	0.667822	0.756387
CG30480	27.7688	-0.408651	0.473171	0.227443	0.343927
CG30487	0	0	1.84404	NA	NA
CG30491	256.75	-0.0411673	0.211123	0.835029	0.88657
CG30495	260.986	-2.54504	0.260415	3.72555e-24	2.34755e-22
CG30503	84.7358	0.508875	0.349079	0.0790089	0.150309
CG3061	1651.31	0.0633199	0.125269	0.605089	0.708152
CG3062	2.08239	-0.0853486	0.982098	0.804887	0.864087
CG3071	275.086	-0.180966	0.240695	0.412295	0.53405
CG3077	270.021	-0.968812	0.341649	0.000692201	0.00272607
CG3078	78.7316	-3.56871	0.36381	1.24247e-23	7.73478e-22
CG3081	7.84502	-0.545406	0.664451	0.153901	0.254795
CG3088	0.396212	0.214386	1.15378	0.542708	NA
CG3092	0	0	1.84404	NA	NA
CG31007	0.198106	0.132603	1.11621	0.698915	NA
CG31008	0.940682	0.362353	1.25696	0.336432	NA
CG31016	0	0	1.84404	NA	NA
CG3104	420.303	-0.0685201	0.214973	0.732893	0.810369
CG31041	1.74722	-0.288974	1.08961	0.434322	0.556031
CG31050	0.099053	0.062845	1.09734	0.852538	NA
CG31051	87.5374	0.0792608	0.274733	0.746543	0.819152
CG3106	13.2836	4.49667	1.52199	5.78364e-05	0.000302471
CG31068	0	0	1.84404	NA	NA
CG31093	0	0	1.84404	NA	NA
CG31125	20.6246	0.667823	0.531105	0.065926	0.130463
CG31128	0	0	1.84404	NA	NA
CG31142	54.2061	-0.100974	0.327582	0.716447	0.797304
CG31156	295.367	-0.602746	0.222395	0.00338368	0.0107524
CG31157	1.68987	-0.402407	1.07614	0.3039	0.423809
CG31174	3.34542	0.0639017	0.772157	0.852457	0.897076
CG31178	0.361728	-0.206909	1.15078	0.555636	NA
CG3119	17.9613	-3.85074	1.19295	2.89502e-05	0.000166862
CG31200	2014.8	-3.49473	0.165281	4.26092e-100	3.14517e-97
CG31211	2512.37	0.269465	0.326803	0.331637	0.452102
CG31226	0	0	1.84404	NA	NA
CG31235	3.15282	0.195273	0.842575	0.581434	0.688967
CG3124	0.351268	0.19753	1.14501	0.572435	NA
CG31248	278.073	-1.41597	0.402888	1.53307e-05	9.52087e-05
CG31249	113.209	-0.29852	0.230558	0.160757	0.263776
CG31251	44.5552	-0.305509	0.382646	0.317337	0.437482
CG31259	1.95556	0.0760571	0.989655	0.825402	0.879895
CG31262	9.88542	-4.42521	2.24696	0.000427596	0.00178464
CG31275	0.213467	-0.152187	1.12477	0.658785	NA
CG31278	71.9765	-0.118176	0.264913	0.620133	0.718165
CG31286	0	0	1.84404	NA	NA
CG31287	1.50189	0.136508	0.919502	0.696311	0.779259
CG31301	588.461	0.234464	0.212065	0.237111	0.35491
CG31326	813.174	0.568067	0.248322	0.0117635	0.0311261
CG31337	0.566421	0.174027	1.12782	0.616594	NA
CG31345	315.042	2.19184	0.287361	4.51906e-16	1.38988e-14
CG31357	770.868	0.929392	0.362254	0.00176774	0.00615909
CG31360	50.868	-8.54502	1.11771	3.00574e-17	1.02175e-15
CG31380	0.099053	0.062845	1.09734	0.852538	NA
CG31381	60.3688	-0.155053	0.411704	0.623801	0.721553
CG31407	0.798976	-0.365267	1.23095	0.336174	NA
CG31437	0.40483	-0.191936	1.143	0.582517	NA
CG31446	0.297159	0.174718	1.1339	0.614765	NA
CG31463	0	0	1.84404	NA	NA
CG31464	2.35982	0.721059	1.51469	0.120511	0.211203
CG31468	0	0	1.84404	NA	NA
CG31477	7.2622	-0.492041	0.669536	0.193241	0.304692
CG31482	4.45283	4.18993	1.7263	0.000202676	0.000935024
CG3149	552.217	0.817921	0.233351	0.000124947	0.000604938
CG31496	0.099053	0.062845	1.09734	0.852538	NA
CG31516	3.4718	3.16991	1.9839	0.00165542	0.00585059
CG31522	8349.39	1.46573	0.238725	2.08297e-11	3.88546e-10
CG31523	5544.79	0.796616	0.198277	1.77482e-05	0.000107257
CG31528	0.0711558	-0.0734839	1.09936	0.828194	NA
CG31546	10.1598	0.89894	0.856276	0.0455384	0.0967106
CG31548	182.345	-0.557229	0.333795	0.047585	0.10007
CG31550	1549.07	-0.749416	0.264889	0.00153924	0.00551543
CG31560	0	0	1.84404	NA	NA
CG3160	524.254	0.710134	0.19361	9.62781e-05	0.000481111
CG31609	0	0	1.84404	NA	NA
CG31612	45.9009	-4.42815	0.593204	1.55026e-14	4.04554e-13
CG3163	224.377	0.171786	0.168706	0.288358	0.409101
CG31644	0.273571	-0.137326	1.11886	0.689046	NA
CG31646	173.071	0.341175	0.29974	0.191738	0.302969
CG31650	574.72	-0.386605	0.232422	0.0709725	0.138456
CG31673	333.063	-0.753459	0.288232	0.00285221	0.00930976
CG31674	84.0437	-2.21916	0.531472	4.41332e-07	3.76919e-06
CG31676	1481.03	0.845524	0.177105	4.689e-07	3.97181e-06
CG3168	14865.2	0.5997	0.71674	0.128858	0.222197
CG31688	407.28	-0.463258	0.499556	0.182055	0.291593
CG31689	1897.43	0.094229	0.242605	0.671545	0.758578
CG31698	0	0	1.84404	NA	NA
CG31706	286.024	3.01465	0.276797	6.28207e-29	4.77345e-27
CG31708	0.693371	0.311043	1.21657	0.397312	NA
CG31710	159.924	-0.498086	0.38628	0.105922	0.189733
CG31728	17.7016	-1.52535	0.61941	0.000455867	0.00188739
CG31730	1.85186	-0.0655243	0.787431	0.848836	0.895637
CG31743	6841.2	-0.505886	0.179172	0.0030051	0.00971067
CG31777	104.825	0.478725	0.387125	0.120541	0.211203
CG31778	8.51877	-0.730777	0.716372	0.073169	0.141597
CG31784	0	0	1.84404	NA	NA
CG31787	0	0	1.84404	NA	NA
CG31788	0	0	1.84404	NA	NA
CG31789	0	0	1.84404	NA	NA
CG31798	0.229743	0.150228	1.12304	0.662799	NA
CG31803	0.198106	0.132603	1.11621	0.698915	NA
CG31807	0.426935	-0.238185	1.16842	0.502857	NA
CG31812	22.75	-0.00483888	0.470794	0.988354	0.990847
CG31816	0.0765811	0.062845	1.09734	0.852538	NA
CG31819	0	0	1.84404	NA	NA
CG31827	0.198106	0.132603	1.11621	0.698915	NA
CG31835	0	0	1.84404	NA	NA
CG31848	0	0	1.84404	NA	NA
CG31849	30.527	0.0181822	0.446411	0.955521	0.969976
CG31851	0	0	1.84404	NA	NA
CG31855	122.952	0.576836	0.297237	0.0260191	0.0605337
CG31862	0	0	1.84404	NA	NA
CG31867	0	0	1.84404	NA	NA
CG31869	1692.91	-4.18143	0.501126	1.36629e-17	4.83537e-16
CG31870	0.355779	-0.210992	1.153	0.548484	NA
CG31871	52.8583	-0.230784	0.397119	0.458264	0.578597
CG31875	13.0197	-4.7047	1.12221	1.56772e-06	1.20006e-05
CG31908	542.607	0.172778	0.14573	0.221329	0.337547
CG31910	1.70283	-0.0533487	0.909555	0.876921	0.914809
CG31913	0.120576	-0.0784281	1.10041	0.816974	NA
CG31917	303.82	0.657719	0.275326	0.00709463	0.0203768
CG3192	1986.93	0.272115	0.207524	0.162006	0.265044
CG31922	22.689	0.0380646	0.405032	0.903325	0.932563
CG31928	14.767	-4.81097	2.34629	NA	NA
CG31933	0	0	1.84404	NA	NA
CG31937	678.752	-0.48331	0.237645	0.0265032	0.0614642
CG31949	0	0	1.84404	NA	NA
CG31950	59.6207	1.42599	0.438479	4.02838e-05	0.000220494
CG31957	113.886	0.536812	0.279647	0.0302343	0.0686986
CG31960	0.202415	-0.0784281	1.10041	0.816974	NA
CG31961	517.117	0.864788	0.159112	1.34287e-08	1.49539e-07
CG31974	34.6794	0.260326	0.486069	0.441093	0.562053
CG31975	0.099053	0.062845	1.09734	0.852538	NA
CG31976	0	0	1.84404	NA	NA
CG3198	4064.08	-2.11916	0.873944	0.000269464	0.00120317
CG3199	0	0	1.84404	NA	NA
CG31997	3549.17	0.228985	0.199875	0.22411	0.34028
CG31999	2192.55	-0.548921	0.295269	0.0333546	0.0746747
CG32017	466.439	0.00387602	0.305018	0.988323	0.990847
CG32023	0	0	1.84404	NA	NA
CG32032	1065.39	-0.162512	0.207202	0.403267	0.525253
CG32036	9.45459	0.539487	0.919697	0.185571	0.295848
CG32037	6.00234	-0.0285065	0.636817	0.933783	0.952587
CG32039	127.071	-1.0685	0.459404	0.00212015	0.00725964
CG32055	7.84866	-1.92009	1.1825	0.00295217	0.00956954
CG32061	0.940682	0.362353	1.25696	0.336432	NA
CG32068	511.679	-1.71848	0.254155	2.4026e-13	5.44484e-12
CG32079	0	0	1.84404	NA	NA
CG32091	6106.31	-3.05178	0.628906	3.62732e-08	3.7787e-07
CG32100	96.7525	-0.881432	0.387777	0.00454782	0.0138961
CG3213	0	0	1.84404	NA	NA
CG32138	12879.3	-1.38954	0.679825	0.00194163	0.00671062
CG32141	5.70846	0.256179	0.777013	0.475691	0.594557
CG32148	0	0	1.84404	NA	NA
CG3216	10.1827	-0.0492799	0.519839	0.884427	0.920039
CG32170	1005.35	-1.06652	0.200828	1.16142e-08	1.30458e-07
CG32202	74.5166	-1.57437	0.312698	1.03482e-08	1.17514e-07
CG3222	0.823702	0.233981	1.15986	0.510316	NA
CG32225	153.867	0.352298	0.209968	0.0729412	0.141315
CG3223	345.978	0.780278	0.250667	0.000563975	0.00228196
CG32230	3139.87	-0.164171	0.301221	0.53163	0.644214
CG32236	2.15912	0.215497	0.970484	0.54814	0.658508
CG32238	8.15192	-0.142517	0.615594	0.680856	0.766278
CG3224	263.503	0.540573	0.257485	0.0199447	0.0487715
CG32240	0.618297	-0.292372	1.2038	0.422055	NA
CG3225	71.8003	-0.550873	0.264658	0.0202798	0.0493934
CG3226	579.503	0.289995	0.192794	0.111845	0.198593
CG32260	51.8264	-0.0261322	0.32964	0.925413	0.947041
CG32266	1.53792	0.472306	1.35397	0.237344	0.355054
CG32267	28.9763	-0.401899	0.590694	0.265836	0.385403
CG32276	177.121	-0.632659	0.904684	NA	NA
CG32295	2.51857	-0.817452	1.12433	0.0838315	0.157799
CG32298	0	0	1.84404	NA	NA
CG32299	0.40483	-0.191936	1.143	0.582517	NA
CG32302	0	0	1.84404	NA	NA
CG32319	0.0711558	-0.0734839	1.09936	0.828194	NA
CG32335	13.3621	-0.227481	0.618237	0.517493	0.632273
CG32354	2375.02	-0.0689466	0.51485	0.838679	0.888815
CG32364	36.5346	-7.94746	1.17603	5.72684e-14	1.41582e-12
CG3238	62.6281	-1.04055	0.777059	0.0203838	0.0496082
CG32395	0	0	1.84404	NA	NA
CG32425	668.111	-0.444242	0.203593	0.0200845	0.0490438
CG32428	1465.76	-2.12046	0.590969	4.94627e-06	3.44439e-05
CG32441	900.016	-0.592827	0.186325	0.000775713	0.00301693
CG32448	129.983	-0.644829	0.258539	0.00556476	0.0165058
CG32459	6.06922	0.00714062	0.658746	0.98338	0.987993
CG32462	1.47134	-0.802895	1.27099	0.0958605	0.17558
CG32486	2378.59	0.76283	0.310171	0.00422638	0.0130452
CG3251	0	0	1.84404	NA	NA
CG32512	2383.04	-0.0858858	0.619384	0.803027	0.862448
CG32521	7564	-0.0359694	0.198688	0.847849	0.895217
CG32523	1.28335	-0.126444	1.04053	0.715622	0.796901
CG3253	44.5986	0.392285	0.360515	0.184302	0.294007
CG32551	6591.18	0.487538	0.231021	0.0219365	0.0525967
CG32554	25.9827	-0.568647	0.604791	0.129287	0.22275
CG32564	8.47127	-0.00938233	0.608139	0.978174	0.985805
CG3257	204.877	0.254613	0.241542	0.249879	0.368156
CG32573	27.0589	1.29268	0.484824	0.000409864	0.00172036
CG32579	217.644	-1.84718	0.3418	1.0662e-09	1.46518e-08
CG32590	181.188	1.87168	0.531993	7.396e-06	4.9225e-05
CG32591	1036.22	7.29191	0.480387	7.09248e-54	1.35729e-51
CG3262	654.705	1.17053	0.180304	5.69154e-12	1.1359e-10
CG32631	0	0	1.84404	NA	NA
CG32638	601.068	0.434932	0.263085	0.0660366	0.130632
CG32639	34.7194	-0.331343	0.744547	0.366171	0.488133
CG32641	1042.93	1.05439	0.214346	9.73216e-08	9.43454e-07
CG32643	0	0	1.84404	NA	NA
CG32649	1158.14	-1.76952	0.326236	9.96255e-10	1.37638e-08
CG32655	0	0	1.84404	NA	NA
CG32668	505.536	0.645367	0.231698	0.00241284	0.00809556
CG32669	101.571	-0.563892	0.587998	0.128942	0.222229
CG32687	549.206	3.3782	0.37671	2.59616e-20	1.0906e-18
CG32694	1258.15	-1.87503	0.418567	1.20715e-07	1.14237e-06
CG32695	0.198106	0.132603	1.11621	0.698915	NA
CG3270	19.9631	1.09678	0.808586	0.0173689	0.0434181
CG32712	0.269262	0.0633257	1.09434	0.851552	NA
CG32720	0	0	1.84404	NA	NA
CG32795	2154.01	-1.07801	0.425675	0.00116267	0.00430029
CG3281	180.005	-0.456716	0.269394	0.0580492	0.118273
CG32815	1214.55	1.78778	0.594854	5.27673e-05	0.000280215
CG32816	84.5363	1.38222	0.296236	1.04536e-07	1.00772e-06
CG32832	0.372624	-0.0660331	1.0959	0.845298	NA
CG32846	0	0	1.84404	NA	NA
CG32850	510.159	0.282873	0.268301	0.23974	0.358017
CG32856	34.3319	-0.707896	0.41072	0.027193	0.0627821
CG3294	78.1864	-1.10718	0.355999	0.000172515	0.000808203
CG32945	0	0	1.84404	NA	NA
CG3295	469.997	-0.585668	0.25214	0.0102814	0.0277554
CG3301	776.403	-3.38463	0.201857	4.59979e-64	1.18836e-61
CG3303	195.553	-1.50295	0.328046	1.17856e-07	1.11942e-06
CG33051	66.8479	-1.64225	0.499913	2.34497e-05	0.000137844
CG33052	148.091	-0.0719681	0.266195	0.763649	0.832949
CG33056	2924.68	-0.717064	0.117933	4.88807e-10	7.15487e-09
CG3306	0	0	1.84404	NA	NA
CG33060	0	0	1.84404	NA	NA
CG33080	1270.28	0.803166	0.209391	3.66827e-05	0.000202933
CG3309	200.674	0.65067	0.287414	0.00995653	0.027048
CG33098	3978.47	0.980923	0.27818	6.25372e-05	0.00032508
CG33107	182.918	1.44294	0.322734	2.29744e-07	2.06092e-06
CG33109	9.00602	1.87992	1.16774	0.00316034	0.0101551
CG33110	4603.56	0.195475	0.227095	0.352598	0.473584
CG33129	1310.15	0.633553	0.173186	0.000123833	0.000601925
CG3313	177.226	0.180753	0.273317	0.459197	0.578983
CG33136	3.71026	-1.49095	1.94263	0.0258161	0.0601678
CG33155	103.224	-0.0195103	0.320853	0.943276	0.960565
CG33203	369.527	0.42386	0.34064	0.137207	0.232747
CG3321	1813.72	0.0549113	0.260356	0.815416	0.871767
CG33213	85.1114	0.412519	0.31536	0.127669	0.220615
CG33233	0.0711558	-0.0734839	1.09936	0.828194	NA
CG33257	0.198106	0.132603	1.11621	0.698915	NA
CG33258	2.76595	-0.58633	0.923977	0.15798	0.260294
CG3326	23.9895	0.485204	0.656579	0.196911	0.308782
CG3328	3462.06	0.231787	0.23182	0.278555	0.399015
CG33298	3175.01	1.20283	0.38584	0.000121708	0.00059271
CG33299	0	0	1.84404	NA	NA
CG3330	0	0	1.84404	NA	NA
CG33301	67.9496	1.9719	0.526846	2.84451e-06	2.09069e-05
CG33303	1165.29	0.486475	0.215417	0.0152748	0.0388983
CG33307	44.5577	4.981	0.795092	5.41238e-11	9.3531e-10
CG33325	0	0	1.84404	NA	NA
CG33339	0	0	1.84404	NA	NA
CG33340	0	0	1.84404	NA	NA
CG33342	0	0	1.84404	NA	NA
CG33346	0.0711558	-0.0734839	1.09936	0.828194	NA
CG3335	515.202	-0.593672	0.250767	0.00897183	0.0248299
CG3338	477.551	-0.195345	0.222964	0.345443	0.466398
CG3342	139.961	-0.545804	0.267763	0.0226864	0.0540042
CG3345	1.68175	-0.733433	1.45637	0.118825	0.208692
CG33470	3398.61	-0.53787	0.242774	0.0151697	0.0386737
CG3348	101.856	0.324854	0.380822	0.28653	0.406955
CG3349	0.273571	-0.137326	1.11886	0.689046	NA
CG33506	178.078	0.245946	0.267279	0.305378	0.42494
CG33514	5.42144	0.0418786	0.657816	0.902873	0.932283
CG3353	176.852	-0.341822	0.22563	0.101842	0.1838
CG33543	121.931	-0.375105	0.418943	0.241999	0.359933
CG3355	0	0	1.84404	NA	NA
CG33631	0	0	1.84404	NA	NA
CG33635	83.5836	0.657917	0.303384	0.0122842	0.032318
CG33645	0.427849	0.228624	1.16169	0.518626	NA
CG33671	477.376	0.452173	0.167548	0.00484785	0.0146742
CG33673	0.0711558	-0.0734839	1.09936	0.828194	NA
CG33679	26.8241	-7.51698	1.14117	3.80412e-13	8.32876e-12
CG33700	0.213467	-0.152187	1.12477	0.658785	NA
CG33704	0	0	1.84404	NA	NA
[truncated: 4,295 more rows]
