# Supplementary material for: Sugar sensation and mechanosensation in the egg-laying preference shift of Drosophila suzukii
Source: eLife. 2022 Nov 18;11:e81703. doi: 10.7554/eLife.81703 (PMC9674340; doi:10.7554/eLife.81703)
Supplement: Supplementary file 4. [file elife-81703-supp4.xlsx]

## Sheet: DESeq2 Labellum RNAseq
	baseMean	log2FoldChange	lfcSE	pvalue	padj
140up	266.149	-0.243089	0.187324	0.173158	0.236403
26-29-p	12936.6	1.8666	0.0676703	4.23049e-169	4.76371e-167
7B2	581.897	-0.717624	0.124512	3.53891e-09	1.29592e-08
AANATL2	13.6632	-1.40793	0.684445	0.00241023	0.00468945
ACC	15853.2	-0.160756	0.0725566	0.0256463	0.0421589
AGBE	2438.26	0.372367	0.111932	0.000708914	0.00149151
AGO1	3401.34	0.029194	0.115294	0.796554	0.837657
ALiX	6857.18	0.751541	0.0814397	1.09683e-20	8.60432e-20
AMPdeam	3380.28	-0.22279	0.0895636	0.0119018	0.0207087
AP-1-2beta	4510.49	0.294708	0.0684798	1.47965e-05	3.83941e-05
AP-1gamma	3936.98	1.03774	0.0798829	2.19387e-39	3.71719e-38
AP-1mu	849.311	-5.3077	0.839038	2.65029e-11	1.14051e-10
AP-2alpha	2445.09	0.654281	0.0719649	4.96831e-20	3.76103e-19
AP-2mu	1736.07	0.448149	0.0820654	3.5043e-08	1.19274e-07
AP-2sigma	575.093	0.229313	0.127899	0.066695	0.101118
APC4	315.18	0.0101307	0.141374	0.941307	0.952944
APP-BP1	363.528	-0.0629017	0.132184	0.626064	0.696988
AQP	206.731	-0.115284	0.23669	0.598929	0.673017
ATP7	2282.12	-1.32113	0.0864655	6.79226e-54	1.7482e-52
ATPCL	12563.8	1.04367	0.0768607	8.34352e-43	1.61637e-41
ATPsyn-Cf6	3387.7	0.0660479	0.126354	0.593234	0.667867
ATPsyn-beta	57158.7	0.619662	0.0661975	4.35637e-21	3.53016e-20
ATPsyn-d	6372.58	0.0886456	0.0666748	0.181046	0.246054
ATbp	102.969	0.349537	0.217341	0.0857506	0.126981
Aatf	301.097	-0.493488	0.154256	0.000927862	0.00192076
Aats-ala	3025.07	0.401592	0.0859556	2.34126e-06	6.65326e-06
Aats-ala-m	855.876	-0.210727	0.0948451	0.0244898	0.0403929
Aats-arg	1204.39	0.611194	0.0984844	3.01679e-10	1.20427e-09
Aats-asn	2027.81	0.118759	0.0863236	0.164614	0.226166
Aats-asp	2329.6	0.633886	0.0880939	3.30079e-13	1.6428e-12
Aats-gln	1432.78	-0.354175	0.0949721	0.000158811	0.000365733
Aats-gly	1529.4	-0.152049	0.107397	0.150385	0.209115
Aats-his	2379.37	0.932303	0.0803594	9.24035e-32	1.1724e-30
Aats-leu	504.347	-0.867071	0.121694	2.92085e-13	1.46043e-12
Aats-lys	1739.85	0.865403	0.0910663	5.79364e-22	4.92368e-21
Aats-pro	135.63	-1.02167	0.214064	3.04928e-07	9.53781e-07
Aats-tyr	1434.88	0.0865195	0.0971515	0.367046	0.453148
Aats-tyr-m	263.422	-1.27099	0.168335	3.27592e-15	1.88365e-14
Aats-val	3434.73	1.03672	0.0869296	1.38395e-33	1.93681e-32
Ac13E	4984.49	-0.695578	0.0842901	7.15868e-17	4.5736e-16
Ac3	173.757	-0.643323	0.194402	0.000463494	0.000999676
Acam	0.168747	0.130421	1.23553	0.720184	NA
Ace	2407.36	-0.460724	0.0934678	5.97884e-07	1.81651e-06
Acer	1432.67	1.91262	0.0976734	4.95351e-87	2.54988e-85
Ack	2157.2	-0.359266	0.0800532	5.93949e-06	1.60998e-05
Acn	2377.37	-0.22608	0.0978227	0.0191962	0.0323632
Acp26Ab	0.724832	0.441222	1.29318	0.296825	0.377936
Acp32CD	0	0	1.71398	NA	NA
Acp53C14b	0	0	1.71398	NA	NA
Acsl	14373.8	1.06982	0.0762669	1.50727e-45	3.2074e-44
Act42A	1766.53	2.14949	0.088385	1.98855e-132	1.76198e-130
Act57B	14499.3	-0.155046	0.167741	0.33677	0.421153
Act5C	28086.5	0.439631	0.0938662	2.1027e-06	6.01965e-06
Act79B	45.9188	-0.638445	0.574527	0.101039	0.147002
Act87E	1145.44	-0.200711	0.178273	0.239552	0.313506
Act88F	5.35645	0.37157	0.675688	0.342112	0.427047
Actn	5348.18	-0.242746	0.131539	0.0587622	0.0903327
AdSL	772.864	0.724882	0.123308	1.7449e-09	6.59063e-09
AdSS	12155.6	0.283826	0.116148	0.0127812	0.0221206
Ada	54.0316	-1.01987	0.331307	0.000346499	0.000762552
Ada2a	140.023	-2.72222	0.23437	6.96275e-33	9.38495e-32
Adam	1873.9	0.0912493	0.123897	0.452054	0.537118
AdenoK	1089.34	0.140115	0.127666	0.2618	0.339254
Adgf-A	22214.4	0.393256	0.103941	0.000122068	0.000285246
Adgf-D	166.28	-0.444698	0.179899	0.00962591	0.0169915
Adgf-E	0.168747	0.130421	1.23553	0.720184	NA
Adh	7797.13	-0.462281	0.144561	0.0009821	0.00202065
Adhr	12.1629	-3.65576	1.13125	2.60484e-05	6.56983e-05
AdipoR	7674.37	0.732229	0.0780257	2.65593e-21	2.17835e-20
Adk3	345.089	0.0744805	0.16604	0.641423	0.710574
Ady43A	544.021	1.07152	0.149042	9.24689e-14	4.79189e-13
Afti	926.237	0.443199	0.117066	0.000112827	0.000264799
Ahcy13	1253.38	-0.511623	0.154752	0.000618116	0.00130914
Ak6	163.126	0.513819	0.23693	0.0187537	0.0317258
Akh	0.656685	-0.146964	1.00198	0.699249	0.760451
AkhR	335.103	-1.71454	0.176247	6.66617e-24	6.11726e-23
Ald	36176.1	0.703405	0.129171	2.29534e-08	7.92737e-08
Aldh	12415.3	-1.87841	0.0640429	1.00857e-190	1.23894e-188
Alg10	378.993	-0.0498067	0.132167	0.699589	0.760665
Alk	246.417	-0.286495	0.237268	0.191671	0.257771
AlkB	181.903	-0.279338	0.182983	0.109782	0.158486
Als2	3202.61	0.58651	0.0946526	3.37433e-10	1.33908e-09
Amph	9512.34	0.172358	0.0768797	0.0238179	0.0394291
Amun	3303.88	-0.131628	0.0803687	0.0984883	0.143795
Amy-p	261.331	1.98922	0.184232	6.90825e-29	7.77898e-28
Amyrel	2.47259	-0.709298	1.10144	0.133532	0.187806
Andorra	0.168747	0.130421	1.23553	0.720184	NA
AnxB10	5356.28	-0.9496	0.0888786	2.59978e-27	2.77156e-26
AnxB9	13868.2	0.0400431	0.0853506	0.635643	0.705689
Aos1	435.776	-0.692262	0.118702	2.51287e-09	9.32193e-09
Aph-4	678.04	-0.496475	0.21074	0.0120317	0.0209103
Aplip1	232.119	0.141818	0.158373	0.354107	0.438979
Aprt	251.564	-0.139846	0.145573	0.322749	0.406539
Aps	935.85	-0.132732	0.0948064	0.156415	0.216387
Arc1	25245.3	3.95462	0.0896228	0	0
Arc2	336.24	0.876458	0.156966	6.35633e-09	2.28887e-08
Arc42	1469.54	-0.975482	0.0810986	4.97728e-34	7.07952e-33
Arf102F	2603.89	0.520522	0.094526	2.41094e-08	8.30538e-08
Arf51F	1053.32	-0.0265624	0.141975	0.847527	0.882509
Arf79F	7635.9	1.22234	0.0998128	1.51331e-35	2.24094e-34
ArfGAP1	1568.61	0.0365172	0.0813729	0.650697	0.718491
ArfGAP3	2360.9	0.353812	0.0798368	7.76364e-06	2.08044e-05
Arfip	479.015	0.369971	0.121362	0.00185501	0.00367272
Arfrp1	213.071	0.307804	0.165272	0.0530324	0.0822733
Arl2	263.557	0.172913	0.141142	0.208056	0.277528
Arl6	78.4753	-0.473943	0.240912	0.0326245	0.0525903
Arp1	2771.57	0.616806	0.0806803	1.15219e-14	6.41357e-14
Arp3	1266.33	0.411226	0.0937236	8.87224e-06	2.35996e-05
Arp5	349.872	-0.241193	0.132609	0.0623998	0.095355
Arp53D	0.235447	0.130421	1.23553	0.720184	NA
Arp6	541.091	-1.45892	0.157908	1.16058e-21	9.65067e-21
Arp8	275.886	-0.386185	0.14047	0.00469702	0.00869133
Arpc2	1093.19	0.604783	0.115467	9.08702e-08	3.00583e-07
Arpc3A	322.597	0.625949	0.150476	1.67718e-05	4.31674e-05
Arpc3B	35.4384	-3.41955	0.534841	9.00113e-12	4.03409e-11
Arpc4	1130.85	1.07253	0.0965281	1.56251e-29	1.83197e-28
Arpc5	339.591	0.157167	0.147017	0.270867	0.349412
Arr1	16.1303	0.396448	0.664944	0.311745	0.39424
Arr2	26.9833	0.273183	0.809459	0.483484	0.568959
Ars2	3464.32	0.0355515	0.129069	0.77815	0.823717
Art1	690.875	0.258976	0.122926	0.0314602	0.0509261
Art2	2.86096	0.0721273	0.687776	0.846941	0.882367
Art4	139.379	-0.191018	0.254932	0.412514	0.498466
Art7	399.766	0.108122	0.132687	0.403946	0.490195
Art8	82.4382	-2.35416	0.30917	3.9127e-16	2.38962e-15
Asap	1754.47	0.128577	0.0829078	0.117494	0.167914
AstA	1.49147	-0.299069	0.944565	0.451756	0.537074
AstA-R1	11.0427	-1.13235	0.662507	0.0101169	0.0178175
AstC	0	0	1.71398	NA	NA
AstC-R1	12.2546	-0.587467	0.505562	0.109134	0.157635
AstCC	0	0	1.71398	NA	NA
Asx	1409.63	-0.191709	0.0983682	0.048285	0.0754061
Atac1	95.5455	-2.02496	0.280397	9.26745e-15	5.19073e-14
Atac2	225.565	-0.322927	0.162757	0.0395034	0.0624864
Atet	3018.56	0.904427	0.083266	4.39045e-28	4.81346e-27
Atf-2	142.203	-1.08054	0.200703	1.00969e-08	3.57628e-08
Atg12	112.025	-0.8003	0.248151	0.000409468	0.000888825
Atg16	409.15	-0.511792	0.118084	9.70738e-06	2.57072e-05
Atg17	3010.47	0.859784	0.104706	6.30368e-17	4.04649e-16
Atg18a	1083.53	0.0791855	0.101031	0.426797	0.510588
Atg2	3688.89	0.116163	0.0790243	0.138217	0.193791
Atg3	1003.36	0.0389188	0.0871277	0.65178	0.719246
Atg4b	474.28	-0.977301	0.11681	1.16049e-17	7.73418e-17
Atg5	340.315	0.20401	0.138931	0.1316	0.185523
Atg6	771.883	-0.143456	0.0960027	0.130245	0.183901
Atg8a	9784.19	0.991415	0.090092	6.79053e-29	7.67842e-28
Atg8b	24.7456	0.644997	0.402005	0.0465214	0.0728413
Atg9	1599.89	-0.0609305	0.116051	0.592859	0.667584
Atox1	521.361	0.575054	0.125471	2.70503e-06	7.61494e-06
AttC	479.599	0.193877	0.637809	0.606572	0.680615
Atxn7	641.926	0.178073	0.11572	0.117059	0.167373
Aven	157.222	-0.0973033	0.178023	0.5682	0.647544
Axs	941.733	0.665192	0.100446	1.74054e-11	7.58679e-11
Axud1	903.125	0.348612	0.113576	0.00177472	0.00352661
BBS8	173.296	-0.734127	0.176256	1.25225e-05	3.26977e-05
BCAS2	229.259	0.381278	0.151866	0.00949216	0.0168103
BCL7-like	60.9782	0.857886	0.319511	0.00193982	0.00382794
BEAF-32	436.463	-0.123197	0.128656	0.327398	0.411723
BG642167	0.453252	-0.206107	1.22569	0.584279	0.660945
BHD	192.975	-0.275921	0.168017	0.0876782	0.129446
BI-1	4838.12	0.301911	0.110377	0.00540205	0.00992795
BM-40-SPARC	1267.42	-0.00546668	0.0976897	0.954795	0.962632
BRWD3	2795.3	0.33702	0.0752282	6.31259e-06	1.70598e-05
Bace	22.3003	-2.83466	2.30451	0.00436201	0.00810753
Bap170	989.39	-0.43438	0.109531	5.46802e-05	0.000133309
Bdbt	242.34	-1.56077	0.182399	4.39012e-19	3.14286e-18
Bem46	365.473	0.638171	0.151349	1.2714e-05	3.31657e-05
Bet1	738.797	1.37758	0.101945	7.36772e-43	1.43764e-41
BicC	292.981	-0.186104	0.885103	0.627116	0.697872
BigH1	56.9934	-0.319594	0.968833	0.425431	0.509744
Bin1	191.074	0.434458	0.165682	0.00638922	0.0116041
Bka	157.376	-0.632016	0.181378	0.000252196	0.000564438
Blos1	144.29	-2.05874	0.227814	2.85197e-21	2.33206e-20
Blos2	272.058	0.439387	0.171749	0.00761978	0.0136691
Blos4	88.3068	-0.121119	0.239885	0.584817	0.661284
BobA	0	0	1.71398	NA	NA
Brd	0.644352	-0.245178	1.27967	0.516538	0.59989
Brms1	456.859	-0.201486	0.112141	0.067559	0.102285
Bro	0.235447	0.130421	1.23553	0.720184	NA
Bsg25A	0	0	1.71398	NA	NA
Bsg25D	1697.7	-0.25556	0.0827212	0.00181643	0.00360552
Btd	2.01668	-0.341352	0.875761	0.394041	0.480223
Bteb2	0	0	1.71398	NA	NA
Bub3	455.187	0.240993	0.120937	0.0420254	0.0661851
Buffy	2081.67	1.19636	0.0826634	1.67938e-48	3.92947e-47
Bug22	240.088	-0.628608	0.163042	6.00905e-05	0.000145515
Burs	0	0	1.71398	NA	NA
Bx42	1444.6	0.344978	0.101823	0.000586694	0.00124356
Bzd	438.459	0.649325	0.114542	7.3019e-09	2.61716e-08
C1GalTA	628.294	-0.886352	0.1301	2.52245e-12	1.18555e-11
C901	1.00204	0.229127	1.0335	0.556222	0.635609
CAH1	18401.8	0.0701357	0.1339	0.591485	0.666314
CCAP	0.298923	0.0440678	1.21345	0.902494	NA
CCHa1	18.9544	-0.771432	0.464777	0.0296643	0.0481982
CCHa2	76.9814	-0.387895	0.31208	0.154676	0.214365
CDC45L	260.18	0.310919	0.201255	0.102129	0.148349
CG10005	0.853702	0.359369	1.12897	0.380418	0.467096
CG10014	0.64769	0.0612826	1.1215	0.868395	0.900034
CG10026	367.07	-1.01032	0.156652	1.96057e-11	8.52525e-11
CG10029	0.259047	-0.113604	1.22547	0.754613	NA
CG10031	828.738	-0.901618	0.137916	1.56827e-11	6.86914e-11
CG10035	16.7432	-0.852514	0.608936	0.0371408	0.0591474
CG10050	49.3889	0.208336	0.272938	0.397577	0.483443
CG10051	7.12726	-2.7663	1.52715	0.00133037	0.00269617
CG10053	144.327	0.13953	0.235065	0.521956	0.603976
CG10063	2.22138	0.916524	1.19538	0.0763565	0.114482
CG10068	543.669	-0.0168284	0.110028	0.87645	0.906297
CG10075	479.308	-0.556714	0.113726	6.03101e-07	1.82825e-06
CG10077	10300.8	-0.466884	0.0941032	5.02203e-07	1.53704e-06
CG10098	648.869	0.147988	0.104892	0.152103	0.211232
CG10104	0	0	1.71398	NA	NA
CG10116	2.26707	-1.76838	1.77053	0.0162163	0.0277458
CG10126	1850.6	-1.26899	0.179241	1.09924e-13	5.65845e-13
CG10131	39.4771	-3.03731	0.532833	3.20637e-10	1.2743e-09
CG10133	155.795	-0.424717	0.195519	0.0218166	0.0363722
CG10139	294.63	0.179217	0.159022	0.243328	0.317909
CG10147	203.392	-0.666462	0.172913	5.52071e-05	0.000134472
CG10163	1.49151	-0.506561	1.15141	0.247722	0.322791
CG10164	0.168747	0.130421	1.23553	0.720184	NA
CG10171	289.006	1.32919	0.214484	3.72463e-11	1.59018e-10
CG10176	2135.31	0.109024	0.115559	0.336699	0.421153
CG10177	0.130176	-0.0407061	1.21302	0.909878	NA
CG10178	208.523	-0.797586	0.175548	1.87647e-06	5.40923e-06
CG10184	128.518	-0.936535	0.198195	5.08114e-07	1.55425e-06
CG10188	982.226	0.37174	0.111352	0.000680305	0.00143355
CG10189	174.877	-1.56662	0.206184	1.11854e-15	6.63634e-15
CG10195	317.443	-0.63113	0.154007	2.16562e-05	5.51092e-05
CG10202	2.79184	0.435731	0.8396	0.288677	0.368953
CG10205	9272.45	-1.42169	0.129484	2.4282e-29	2.81639e-28
CG10208	198.338	0.575506	0.19824	0.002103	0.00413486
CG10211	15194.4	-2.71252	0.155636	1.01166e-69	3.77104e-68
CG10214	154.119	-2.03707	0.221577	6.90514e-22	5.84073e-21
CG10217	3706.84	-0.420525	0.0749862	1.5736e-08	5.49793e-08
CG10219	2225.32	-0.465024	0.112323	2.48354e-05	6.28443e-05
CG10253	159.418	-0.687701	0.19164	0.000149007	0.000344033
CG10257	139.829	-0.564762	0.213703	0.00473539	0.00875934
CG10262	221.467	1.39527	0.186052	3.47635e-15	1.99254e-14
CG10264	0.429099	-0.0291455	1.18514	0.935955	0.949303
CG10265	56.5122	-1.21827	0.320417	1.3139e-05	3.42247e-05
CG10286	583.262	0.533489	0.119388	5.03271e-06	1.37452e-05
CG10289	2182.95	-0.331446	0.090956	0.000227388	0.000512311
CG10306	2082.45	0.37127	0.0911383	3.75975e-05	9.31749e-05
CG10307	319.395	-0.865043	0.163962	3.68763e-08	1.25277e-07
CG10311	613.802	-0.518382	0.155179	0.000540017	0.00115413
CG10320	1291.71	-0.629566	0.113937	1.74325e-08	6.07105e-08
CG10324	289.379	0.904031	0.165921	1.25467e-08	4.41503e-08
CG10326	511.107	-0.55912	0.125834	5.39073e-06	1.4649e-05
CG10333	905.519	-0.430018	0.150794	0.00322054	0.00614438
CG10336	33.0863	0.661726	0.465302	0.0609436	0.0934734
CG10337	379.799	1.79374	0.193145	4.0528e-22	3.48257e-21
CG10339	1227.99	-0.207466	0.13043	0.103483	0.150074
CG10343	234.892	0.394652	0.184597	0.0248656	0.0409675
CG10344	134.731	-1.08511	0.227038	2.40162e-07	7.56454e-07
CG10345	26263.8	0.00543259	0.0737801	0.940871	0.95268
CG10348	169.794	-2.74489	0.238059	1.94384e-32	2.5878e-31
CG10352	34.3953	-6.58222	1.22844	2.46661e-09	9.16291e-09
CG10353	2237.73	0.374918	0.0734196	2.66688e-07	8.37077e-07
CG10362	243.977	0.336383	0.159873	0.0292019	0.0475984
CG10365	428.629	0.214336	0.139176	0.11375	0.163255
CG10366	339.879	-0.0981618	0.140599	0.473262	0.558267
CG10375	491.27	-0.0879795	0.122635	0.464047	0.549075
CG10376	602.043	0.0212138	0.125993	0.863413	0.895386
CG10383	1033.79	-0.600766	0.103869	4.13148e-09	1.50274e-08
CG10396	3.46023	-2.83918	1.96117	0.00296859	0.00569181
CG10399	89.6195	-1.24175	0.244239	3.09959e-08	1.06034e-07
CG10407	28.7958	-2.09251	0.606052	9.69977e-06	2.56996e-05
CG1041	2233.1	-0.598913	0.0946956	1.44695e-10	5.91137e-10
CG10413	1805.04	-0.489612	0.0801068	6.84966e-10	2.66348e-09
CG10418	61.608	-0.882523	0.319615	0.00143746	0.00290013
CG10425	781.582	0.968825	0.102812	8.82011e-22	7.4141e-21
CG10426	187.38	-0.0798202	0.160715	0.606963	0.680913
CG10428	156.616	-1.89443	0.208031	1.86465e-21	1.53634e-20
CG10431	88.7445	0.496604	0.233397	0.0214374	0.0357841
CG10435	665.1	-0.23469	0.103506	0.021388	0.0357127
CG10444	798.946	-1.55958	0.101889	2.66926e-54	6.96975e-53
CG10463	147.305	-1.15041	0.230758	6.85884e-08	2.29122e-07
CG10465	1664.78	0.860462	0.159952	2.11675e-08	7.33871e-08
CG10466	81.777	0.88309	0.257165	0.000152171	0.00035089
CG10470	584.119	0.243732	0.183995	0.165117	0.226742
CG10479	51.4072	0.368106	0.312913	0.177731	0.242096
CG10505	10.9257	1.00227	0.636455	0.0183526	0.0311154
CG10508	762.404	-4.42317	0.169222	3.35566e-151	3.48795e-149
CG10510	1.39335	-0.54907	1.11271	0.217123	0.287776
CG10527	11040.3	-0.630313	0.0746163	1.59951e-17	1.05302e-16
CG10561	556.133	-0.243061	0.117452	0.0349298	0.0559063
CG10565	1725.7	-0.359951	0.0840136	1.5098e-05	3.91578e-05
CG10566	102.064	-0.475419	0.216576	0.0188996	0.0319327
CG10570	5990.99	-1.29817	0.11921	8.91721e-29	9.99949e-28
CG10576	3012.27	0.30242	0.0767197	7.05889e-05	0.000169194
CG10581	45.2111	-1.2396	0.33884	2.19197e-05	5.57533e-05
CG10584	212.931	-0.735957	0.173047	8.46317e-06	2.25448e-05
CG10589	0	0	1.71398	NA	NA
CG10590	2161.08	1.03514	0.0975977	4.47522e-27	4.70595e-26
CG10591	0.162191	-0.0407061	1.21302	0.909878	NA
CG10592	2.01673	-0.449668	1.06673	0.290041	0.370608
CG10616	961.616	0.312602	0.102756	0.00201984	0.0039757
CG10621	255.586	1.69723	0.200321	7.10596e-19	4.9945e-18
CG10623	630.18	-0.926812	0.124932	2.74157e-14	1.47445e-13
CG10628	234.636	-1.17522	0.165827	1.38646e-13	7.09644e-13
CG10635	358.644	-1.24623	0.171989	3.48897e-14	1.85609e-13
CG10639	845.791	0.185584	0.100869	0.0620975	0.0950527
CG10654	27.6533	-1.66956	0.551818	7.99295e-05	0.000190905
CG10659	0	0	1.71398	NA	NA
CG10660	385.528	-0.0146064	0.135925	0.912264	0.932978
CG10671	1891.45	0.152982	0.0809426	0.0565302	0.0871246
CG10674	433.523	0.699807	0.145765	7.03123e-07	2.11485e-06
CG10694	0	0	1.71398	NA	NA
CG10702	178.788	0.68006	0.198208	0.000273339	0.000608734
CG10710	113.299	-2.55514	0.312836	5.04188e-18	3.39369e-17
CG10713	20.1976	-0.13786	0.390657	0.663125	0.729829
CG10725	1.7751	1.32005	1.71979	0.0389318	0.0616905
CG10731	157.315	0.0660271	0.190791	0.716105	0.773955
CG10738	24.5785	-1.79508	0.558068	3.31321e-05	8.26772e-05
CG1074	389.54	-0.755219	0.126106	8.22327e-10	3.18843e-09
CG10747	1061.39	-1.11862	0.0904494	4.7242e-36	7.31642e-35
CG10748	0	0	1.71398	NA	NA
CG10749	0	0	1.71398	NA	NA
CG10750	0.168747	0.130421	1.23553	0.720184	NA
CG10754	539.595	0.0580166	0.106001	0.578412	0.65639
CG10761	0.298923	0.0440678	1.21345	0.902494	NA
CG1077	8.39348	-1.42151	1.39389	0.0232671	0.0385526
CG10777	1734.3	0.814672	0.134325	4.32797e-10	1.70749e-09
CG10778	452.296	0.436084	0.123461	0.000305956	0.000677188
CG10799	375.736	2.72785	0.16767	3.3945e-61	1.07294e-59
CG10802	711.739	0.297501	0.105158	0.00406703	0.00759844
CG10809	203.705	-0.00532433	0.158353	0.972249	0.977692
CG10814	51.7539	0.456182	0.422791	0.170125	0.232673
CG10822	0	0	1.71398	NA	NA
CG10834	0.130176	-0.0407061	1.21302	0.909878	NA
CG10839	0	0	1.71398	NA	NA
CG10841	5.64043	-0.91244	0.832785	0.0499781	0.0778702
CG10859	4.55034	0.0860843	0.645593	0.817414	0.855894
CG10864	19.0238	0.0438075	0.414005	0.893321	0.918471
CG10869	4.05149	-3.53909	1.86798	0.000827875	0.00172634
CG10874	452.48	0.49047	0.146664	0.00056014	0.00119242
CG10898	265.173	0.0830066	0.158096	0.586998	0.663195
CG10899	0.907316	-0.45329	1.25823	0.288562	0.368953
CG10903	311.137	0.402624	0.141628	0.00344454	0.0065211
CG10904	192.546	-1.21949	0.201905	1.36928e-10	5.60254e-10
CG10907	198.815	0.390318	0.162505	0.0126545	0.0219153
CG1091	1154.05	-0.490404	0.0986497	4.60152e-07	1.41394e-06
CG10912	4.72811	0.196858	0.717915	0.604715	0.678954
CG10914	165.782	-0.972151	0.186485	3.6718e-08	1.24818e-07
CG10915	694.751	-0.169869	0.14295	0.22172	0.29315
CG10919	0.955608	-0.0861542	0.887696	0.818765	0.857142
CG1092	93.1891	-0.385515	0.260896	0.104039	0.15084
CG10920	0	0	1.71398	NA	NA
CG10932	1313.14	0.152538	0.0993319	0.119612	0.170626
CG10933	229.483	0.392466	0.184411	0.0255463	0.0420072
CG10936	574.604	-2.65882	0.142069	6.90519e-80	3.16293e-78
CG10947	495.935	0.405665	0.197963	0.0303029	0.0491853
CG10949	144.041	-2.49183	0.225202	2.84335e-30	3.43809e-29
CG10950	2.65891	-2.19392	1.87027	0.00798936	0.0143036
CG10962	63.7689	-1.01543	0.332087	0.000376138	0.000822421
CG10970	2.87165	0.90145	1.09451	0.0733219	0.110268
CG10979	1290.24	0.552292	0.100986	2.81573e-08	9.66285e-08
CG10996	3.22057	-0.102298	0.702433	0.784941	0.828629
CG11007	149.211	-0.983997	0.201498	1.97916e-07	6.28149e-07
CG11018	0	0	1.71398	NA	NA
CG1103	171.053	-0.0573831	0.177786	0.736155	0.790723
CG11030	347.274	-0.652464	0.143495	2.71216e-06	7.62707e-06
CG11034	295.517	-1.02269	0.171158	3.85135e-10	1.52502e-09
CG11035	306.331	0.108346	0.165757	0.497408	0.58205
CG11041	7.22696	1.12994	0.881016	0.0230066	0.0381795
CG11044	129.454	-1.34514	0.226049	1.66132e-10	6.7667e-10
CG1105	2119.22	0.572695	0.111593	1.71022e-07	5.47615e-07
CG11050	3992.88	0.650184	0.0873624	5.0623e-14	2.65648e-13
CG11052	0.162191	-0.0407061	1.21302	0.909878	NA
CG11068	2.92264	0.214539	0.705604	0.573478	0.652009
CG11069	818.166	-1.88523	0.145287	3.8387e-40	6.67144e-39
CG11070	2123.21	0.281824	0.0773822	0.000240359	0.000538839
CG11073	24223.2	0.474184	0.0648113	1.82248e-13	9.25799e-13
CG11077	320.161	-2.25506	0.179889	7.1635e-38	1.15578e-36
CG11089	441.506	0.219419	0.150738	0.133142	0.187404
CG11095	263.998	0.961861	0.156195	1.51157e-10	6.16608e-10
CG11099	103.269	-0.427068	0.215123	0.0340128	0.0546165
CG11107	1565.94	0.0314627	0.0813458	0.696353	0.758675
CG11110	111.64	0.712264	0.222329	0.000562963	0.00119749
CG11123	380.342	0.00283618	0.164587	0.985736	0.988846
CG11125	108.403	-2.74286	0.27741	9.69508e-25	9.27468e-24
CG11127	367.537	-2.70658	0.171941	1.57e-57	4.56228e-56
CG11131	0	0	1.71398	NA	NA
CG11134	210.982	-0.887571	0.181578	2.63724e-07	8.28257e-07
CG11137	1243.12	-0.846821	0.118951	3.24954e-13	1.61878e-12
CG11141	714.082	-0.552729	0.105577	1.02207e-07	3.37051e-07
CG11145	0.168747	0.130421	1.23553	0.720184	NA
CG11147	11915.4	-0.144953	0.0952241	0.123287	0.175313
CG11148	5291.32	-0.0688579	0.0960116	0.467725	0.553185
CG11151	5700.13	-0.0475062	0.123994	0.695654	0.758372
CG11158	406.219	-0.267006	0.146399	0.0602807	0.0924829
CG11162	0	0	1.71398	NA	NA
CG11164	57.9579	0.449562	0.278665	0.071938	0.108519
CG11168	895.598	-0.259011	0.0893573	0.0033817	0.00641787
CG11170	120.777	-0.0659896	0.20089	0.728537	0.784723
CG11178	406.918	0.227673	0.117771	0.0487921	0.076176
CG11190	1318.28	-0.897113	0.112251	3.39298e-16	2.0769e-15
CG11191	333.057	-0.906695	0.138466	1.4362e-11	6.32136e-11
CG11192	0	0	1.71398	NA	NA
CG11200	1965.29	-0.204729	0.104836	0.0474257	0.0742356
CG11208	1907.75	0.625244	0.0899409	1.95013e-12	9.31133e-12
Tmem63	3392.44	0.729279	0.0808893	8.2683e-20	6.13876e-19
CG11221	33.8568	-0.451615	0.324983	0.107516	0.155381
CG11226	2.11456	-0.486092	0.986842	0.255299	0.331546
CG11236	62.4639	-3.03745	0.390786	2.54244e-16	1.5639e-15
CG1124	24661.9	-1.46864	0.0807453	2.92504e-75	1.19771e-73
CG11241	343.133	-1.60448	0.179953	1.68871e-20	1.31142e-19
CG11247	423.013	-1.03498	0.156014	5.25563e-12	2.40734e-11
CG11248	552.42	0.693593	0.119497	2.95493e-09	1.08945e-08
CG11249	2.51841	0.987236	1.26846	0.0660005	0.100121
CG11251	0	0	1.71398	NA	NA
CG11257	165.715	-1.39013	0.187987	7.77899e-15	4.37974e-14
CG11267	649.23	0.772332	0.144722	3.48848e-08	1.18811e-07
CG11269	0	0	1.71398	NA	NA
CG11275	2851.65	0.230948	0.134288	0.0778987	0.116503
CG11279	98.4193	-0.638615	0.254454	0.005831	0.0106619
CG11289	4.34124	-3.75508	1.82783	0.000541727	0.00115733
CG11298	0.168747	0.130421	1.23553	0.720184	NA
CG11307	258.515	0.660596	0.145403	2.7078e-06	7.61878e-06
CG11309	2368.77	0.109487	0.10261	0.279084	0.358983
CG11318	1.69468	0.216755	0.882679	0.574472	0.652864
CG11320	1.05116	-0.1244	0.923437	0.742428	0.795249
CG11333	0.168747	0.130421	1.23553	0.720184	NA
CG11340	0.596541	0.0517345	1.0565	0.889669	0.916462
CG11342	36.2706	-1.72201	0.454237	4.1694e-06	1.1486e-05
CG11349	0.12887	-0.0407061	1.21302	0.909878	NA
CG1136	590.098	0.33266	0.104399	0.00121457	0.00247354
CG11368	42449	0.335172	0.091991	0.000226928	0.000511487
CG11369	0	0	1.71398	NA	NA
CG11373	0	0	1.71398	NA	NA
CG11377	1070.41	-0.31478	0.125418	0.0103018	0.0181136
CG11378	2895.76	2.09079	0.0874814	5.38476e-128	4.47763e-126
CG11379	0	0	1.71398	NA	NA
CG11382	1.72956	-0.56031	1.20651	0.213588	0.283856
CG11384	0.621463	0.0702521	0.993587	0.851494	0.885403
CG1139	25.1079	-2.82901	0.586373	2.60894e-08	8.9703e-08
CG11391	54.8178	-2.88725	0.612146	4.66029e-08	1.57431e-07
CG11398	139.358	0.217941	0.233874	0.314942	0.397632
CG11399	887.532	-0.128443	0.121952	0.282487	0.362757
CG11400	1116.9	1.75719	0.120641	1.30522e-49	3.13544e-48
CG11403	113.075	-1.37671	0.293434	1.57501e-07	5.06419e-07
CG11404	0	0	1.71398	NA	NA
CG11407	15188.9	-15.4414	1.16191	2.36777e-42	4.47476e-41
CG11409	128.226	-3.45116	0.330507	1.48587e-26	1.52105e-25
CG11412	734.001	-0.597426	0.118949	2.88951e-07	9.05378e-07
CG11413	2.82765	-1.40892	1.49602	0.0271441	0.0444588
CG11414	1706.35	-0.267808	0.0767823	0.000437394	0.000947161
CG11417	372.106	-1.10553	0.128441	9.4523e-19	6.60073e-18
CG11425	736.168	-2.32537	0.136751	1.11127e-66	3.82575e-65
CG11426	1330.32	1.42275	0.143245	1.52437e-24	1.44802e-23
CG11436	167.177	-0.7834	0.177808	3.7128e-06	1.03017e-05
CG11437	24.4544	-2.87799	0.646382	1.57957e-07	5.07584e-07
CG11444	1681.36	0.813137	0.08462	2.44027e-22	2.11712e-21
CG11447	189.443	-1.74031	0.198108	4.33846e-20	3.30273e-19
CG11453	69.686	-2.9911	0.384126	2.08173e-16	1.28591e-15
CG11454	388.171	-0.214308	0.157794	0.159889	0.220572
CG1146	885.707	0.248247	0.132125	0.05427	0.0840245
CG11523	203.944	0.0630214	0.178085	0.71176	0.770646
CG11529	315.569	3.71646	0.249273	4.88662e-51	1.21715e-49
CG11534	542.377	-0.0220255	0.108077	0.835979	0.872459
CG11539	109.459	-0.301946	0.208376	0.123729	0.175803
CG11550	24604.1	-1.45438	0.0929246	1.54119e-56	4.36132e-55
CG11562	76.1477	-1.29521	0.290829	6.14149e-07	1.86069e-06
CG11563	320.969	0.803077	0.157603	1.16904e-07	3.83181e-07
CG11576	3177.21	-0.94133	0.0939807	2.86564e-24	2.68902e-23
CG11581	0	0	1.71398	NA	NA
CG11583	436.96	0.417583	0.135267	0.00153114	0.0030708
CG11586	187.855	-0.297153	0.184465	0.0912248	0.134023
CG11590	406.458	0.531384	0.142711	0.000124796	0.000290868
CG11596	374.741	0.0145306	0.137489	0.913657	0.933519
CG11619	7.87284	-5.20333	1.4367	8.07949e-06	2.15759e-05
CG11629	0	0	1.71398	NA	NA
CG11634	0	0	1.71398	NA	NA
CG11635	17.8462	-0.345643	0.441876	0.308557	0.390848
CG11638	57.0038	-2.21137	0.391085	2.38879e-10	9.61386e-10
CG11652	3606.32	1.16145	0.157424	1.69823e-14	9.29982e-14
CG11655	2409.36	1.03926	0.104011	2.61772e-24	2.46494e-23
CG11656	0.656685	-0.146964	1.00198	0.699249	0.760451
CG11659	0	0	1.71398	NA	NA
CG11663	0.168747	0.130421	1.23553	0.720184	NA
CG11664	0	0	1.71398	NA	NA
CG11666	0	0	1.71398	NA	NA
CG11672	0.12887	-0.0407061	1.21302	0.909878	NA
CG11674	110.639	0.78256	1.14754	0.109818	0.158495
CG11679	282.803	-0.967071	0.148698	1.58357e-11	6.93054e-11
CG11686	322.444	-2.72302	0.208815	1.46748e-40	2.63513e-39
CG11693	2.53004	-2.02739	1.84197	0.0105419	0.0184876
CG11697	0.12887	-0.0407061	1.21302	0.909878	NA
CG11699	523.318	-0.502778	0.126465	4.71041e-05	0.000115516
CG11722	191.573	-0.227137	0.182385	0.192304	0.258498
CG11741	8.85951	-2.42429	1.23525	0.00101955	0.00209053
CG11753	320.574	-0.65957	0.152143	7.11156e-06	1.91329e-05
CG11755	45.3896	-1.87925	0.425114	2.08768e-07	6.60264e-07
CG11760	75.0205	0.342471	0.24502	0.128511	0.181833
CG11777	88.6262	-0.947496	0.286214	0.000194738	0.000442624
CG11779	862.132	0.81335	0.105308	3.7582e-15	2.14726e-14
CG11781	390.166	0.580908	0.12231	1.19252e-06	3.50683e-06
CG11786	1.00336	-0.616824	1.27442	0.183781	0.249167
CG11788	55.005	-1.33232	0.339849	5.87207e-06	1.5925e-05
CG11796	3053.31	-2.62738	0.186687	9.66183e-47	2.12285e-45
CG11807	1126.77	-0.584284	0.0898858	4.71203e-11	1.9944e-10
CG11808	94.4203	-0.677996	0.281774	0.00699407	0.012622
CG11811	379.355	-0.487371	0.135863	0.000229008	0.000515315
CG11816	0.664563	0.386925	1.27849	0.34605	0.430372
CG11825	97.9379	2.88768	0.320869	5.93546e-21	4.7811e-20
CG11835	269.629	0.0613659	0.214472	0.760616	0.81047
CG11839	88.7298	-0.0666886	0.257818	0.776914	0.823376
CG11842	179.435	0.446107	0.177667	0.00861691	0.0153357
CG11857	1665.8	0.553896	0.0908802	6.82022e-10	2.6556e-09
CG11858	194.308	0.340113	0.207487	0.0816852	0.121594
CG11865	0	0	1.71398	NA	NA
CG11885	127.991	0.638929	0.213269	0.0013541	0.00274321
CG11889	26.3838	0.161991	0.402524	0.614879	0.687652
CG11906	284.071	0.0561344	0.136294	0.672755	0.738204
CG11911	4.83049	0.109457	0.73134	0.770712	0.818087
CG11912	0.12887	-0.0407061	1.21302	0.909878	NA
CG11920	167.599	-0.552916	0.204226	0.00401513	0.00751446
CG11929	0	0	1.71398	NA	NA
CG11964	625.36	-0.387937	0.114534	0.000559244	0.00119098
CG11966	0.53437	0.174667	1.11051	0.646293	0.714911
CG11970	1222.13	0.51368	0.0939913	3.08413e-08	1.05572e-07
CG11975	797.707	0.522532	0.098928	8.38593e-08	2.78586e-07
CG11977	0.46767	0.119314	1.18839	0.746071	0.797835
CG11980	653.292	-2.58393	0.150898	1.6418e-67	5.79996e-66
CG11985	175.416	0.378367	0.222186	0.0679488	0.102788
CG11999	1289.23	0.822256	0.10327	5.46693e-16	3.31264e-15
CG12003	0	0	1.71398	NA	NA
CG12004	1918.22	0.574706	0.0924421	3.03312e-10	1.20989e-09
CG12006	732.541	0.111295	0.0957996	0.239473	0.313478
CG12007	530.651	-0.809941	0.115953	9.52109e-13	4.58659e-12
CG12016	692.457	0.583304	0.118229	4.70371e-07	1.4437e-06
CG12018	137.486	-0.531333	0.196176	0.00418044	0.00779685
CG12024	407.023	0.385268	0.11872	0.000930885	0.00192628
CG12025	765.803	0.88008	0.119314	4.39095e-14	2.31995e-13
CG12027	0	0	1.71398	NA	NA
CG12034	456.664	-0.0142396	0.133367	0.912906	0.933105
CG12035	0.728039	0.322375	1.07595	0.424062	0.508729
CG12038	61.3299	-0.262669	0.266879	0.277364	0.357026
CG12050	729.501	0.477928	0.11709	3.13082e-05	7.82704e-05
CG12056	678.794	-0.188782	0.120847	0.111008	0.160084
CG12057	1.69229	-0.609081	1.41503	0.18641	0.252076
CG12081	445.25	0.42893	0.141121	0.00176467	0.00350922
CG12090	2796.3	-0.0301561	0.0710555	0.669158	0.734973
CG12091	1701.89	-0.0786635	0.140869	0.566195	0.645629
CG12096	730.052	-0.566416	0.0968541	3.01718e-09	1.11013e-08
CG12099	5592.09	0.116384	0.071551	0.101438	0.147544
CG12104	361.193	-0.057005	0.139014	0.673786	0.739155
CG12106	122.086	1.16273	0.21709	9.05392e-09	3.22162e-08
CG12107	484.608	-0.268044	0.170678	0.102023	0.148235
CG12111	6.83133	1.00704	0.821269	0.0330286	0.0531467
CG12115	1.55477	-1.08431	1.49905	0.0594269	0.0912507
CG12116	844.779	-2.12694	0.189871	6.62842e-31	8.21712e-30
CG12118	725.324	0.38114	0.138036	0.00456005	0.00845525
CG12121	3625.52	0.809419	0.0754219	2.44037e-27	2.61192e-26
CG12123	150.054	-0.208534	0.198152	0.266643	0.344375
CG12125	475.227	-0.0219112	0.166496	0.891306	0.917097
CG12126	0	0	1.71398	NA	NA
CG12128	628.328	0.987496	0.110971	1.06883e-19	7.88957e-19
CG12134	177.989	-1.65581	0.184719	9.99893e-21	7.8667e-20
CG12147	0.130176	-0.0407061	1.21302	0.909878	NA
CG12155	581.74	0.232441	0.116698	0.0424088	0.0667305
CG12158	27065.8	-1.30699	0.443414	0.00023393	0.000525517
CG12159	260.261	-0.334189	0.161149	0.0315104	0.0509921
CG12162	1045.19	0.398544	0.101742	7.03041e-05	0.000168586
CG12164	1.68184	-0.865097	1.47446	0.0995936	0.145134
CG12179	108.953	-1.8458	0.274286	3.87152e-13	1.91626e-12
CG1218	363.655	0.055776	0.13526	0.672502	0.738204
CG12182	110.412	0.775824	0.224446	0.000192391	0.000438025
CG12194	365.83	-0.328299	0.141362	0.0169302	0.0288668
CG12203	2208.69	-0.0472875	0.114859	0.675131	0.740329
CG12207	2971.33	0.646914	0.113273	5.73705e-09	2.07001e-08
CG12209	1.36264	-0.449878	1.12991	0.291832	0.372544
CG12219	449.3	-0.50569	0.129107	5.98629e-05	0.000145029
CG12229	116.841	8.19407	1.05876	6.85931e-17	4.39272e-16
CG12231	0	0	1.71398	NA	NA
CG12237	968.259	0.928335	0.130591	2.69486e-13	1.35369e-12
CG12253	70.7607	0.348811	0.291586	0.178138	0.242589
CG12262	8854.94	0.0178401	0.0683334	0.792763	0.835097
CG12267	165.394	-0.674802	0.204332	0.000439525	0.000951013
CG1227	168.802	-5.82061	0.423128	3.85029e-44	7.85314e-43
CG12272	913.987	-0.604843	0.105474	5.48579e-09	1.98068e-08
CG12290	2220.27	-2.04528	0.103978	7.16936e-88	3.76218e-86
CG12307	0.661876	0.0157037	1.11487	0.966044	0.972159
CG12321	1096.76	0.146043	0.0916498	0.107006	0.154726
CG12325	313.13	-0.327423	0.133429	0.0118772	0.0206751
CG1233	1755.24	0.538797	0.0967723	1.64783e-08	5.74243e-08
CG12333	402.465	-0.52611	0.120879	8.71122e-06	2.31827e-05
CG12338	316.257	-1.54377	0.172225	1.23064e-20	9.59829e-20
CG1234	523.448	-0.27426	0.136696	0.0394984	0.0624864
CG12341	152.807	0.410874	0.191728	0.0239659	0.0396254
CG12343	382.404	-1.14755	0.160506	9.61729e-14	4.9743e-13
CG12360	1493.05	0.574941	0.0852778	9.36556e-12	4.19047e-11
CG12362	0.646963	-0.31684	1.22042	0.426608	0.510475
CG12374	53.7706	-0.838164	1.21543	NA	NA
CG12375	1237.46	-0.420189	0.124089	0.000537234	0.00114894
CG12379	64.3272	0.44413	0.262246	0.0620215	0.094965
CG1239	119.412	-0.110151	0.216397	0.587338	0.663378
CG12391	777.553	0.0364056	0.110762	0.73824	0.792175
CG12395	0	0	1.71398	NA	NA
CG12400	1115.04	-0.180021	0.102709	0.0753781	0.113109
CG12404	1143.92	0.618079	0.128155	7.65302e-07	2.29293e-06
CG12426	0.572941	0.339056	1.26595	0.396967	0.48281
CG12438	0.426488	-0.0279189	1.18596	0.938623	0.951117
CG12439	0	0	1.71398	NA	NA
CG12446	0	0	1.71398	NA	NA
CG12448	20.0754	-5.04069	1.13064	4.8251e-07	1.47928e-06
CG1246	18.7903	-0.342398	0.428015	0.305079	0.386978
CG12464	0.168747	0.130421	1.23553	0.720184	NA
CG12470	4.20838	-0.822446	0.994138	0.086186	0.127546
CG12479	0	0	1.71398	NA	NA
CG12496	0.259047	-0.113604	1.22547	0.754613	NA
CG12498	0.621999	-0.13851	1.06989	0.714246	0.772264
CG12507	105.33	-2.24279	0.335216	3.36287e-13	1.67215e-12
CG12511	0	0	1.71398	NA	NA
CG12512	1368.21	-0.0575484	0.15705	0.704749	0.76428
CG12516	0	0	1.71398	NA	NA
CG12517	0.674988	0.314178	1.31924	0.419352	0.504697
CG12531	100.514	0.0294538	0.227601	0.889529	0.916462
CG12540	0	0	1.71398	NA	NA
CG12541	146.779	1.7837	0.227477	1.13644e-16	7.12579e-16
CG12576	2757.11	0.0797035	0.105642	0.443699	0.528703
CG12589	0	0	1.71398	NA	NA
CG12590	0.259047	-0.113604	1.22547	0.754613	NA
CG12608	415.126	-1.86943	0.135437	5.75968e-45	1.19276e-43
CG12609	0	0	1.71398	NA	NA
CG12617	0	0	1.71398	NA	NA
CG12620	0.168747	0.130421	1.23553	0.720184	NA
CG12637	0	0	1.71398	NA	NA
CG12643	15.9086	-2.25696	0.742017	3.88734e-05	9.60725e-05
CG12645	2.62368	1.69879	1.66158	0.0167661	0.0286141
CG1265	271.73	0.234401	0.141401	0.0883833	0.130344
CG12655	657.13	0.0636039	0.171183	0.699005	0.760451
CG12659	28.6812	1.31584	0.495871	0.000574615	0.00121939
CG12661	0	0	1.71398	NA	NA
CG12674	0	0	1.71398	NA	NA
CG12679	0.65532	-0.128857	1.14181	0.730131	0.785345
CG12680	0.365623	0.0441489	1.2127	0.902344	NA
CG12682	0	0	1.71398	NA	NA
CG12689	25.6992	-1.70721	0.497348	1.73858e-05	4.4578e-05
CG12698	0.90781	-0.528628	1.24354	0.234086	0.307578
CG12699	0.168747	0.130421	1.23553	0.720184	NA
CG12702	28.6295	-0.57411	0.426566	0.0868166	0.128419
CG12708	4.85432	-1.18614	1.1945	0.0342324	0.0549202
CG12713	68.6117	0.60473	0.256883	0.00961401	0.0169816
CG12716	4.14997	-2.35885	2.08931	0.00750568	0.0134957
CG12721	1.26973	-0.241525	0.940288	0.535746	0.617422
CG12729	0	0	1.71398	NA	NA
CG1273	77.864	4.86728	0.459069	5.32498e-27	5.52429e-26
CG12730	525.707	-0.683331	0.17833	5.79958e-05	0.000140821
CG12736	678.825	-0.348567	0.131816	0.00673496	0.0122033
CG12744	24.1665	0.151629	0.374976	0.623468	0.694814
CG12746	1947.67	0.518951	0.0911235	8.16239e-09	2.91398e-08
CG12768	48.0172	0.677661	0.297707	0.00980671	0.017305
CG12773	1803.33	0.42439	0.0783783	4.69503e-08	1.58505e-07
CG12782	0	0	1.71398	NA	NA
CG12795	297.953	-0.0909704	0.137485	0.497212	0.581947
CG12796	0.453252	-0.206107	1.22569	0.584279	0.660945
CG12811	990.925	1.0076	0.11332	1.06349e-19	7.86344e-19
CG12818	138.377	0.64727	0.204267	0.000747675	0.00156696
CG12825	515.773	5.58411	0.203701	2.05927e-166	2.2715e-164
CG12826	254.733	11.0692	1.21289	4.46255e-22	3.82252e-21
CG12828	0	0	1.71398	NA	NA
CG12831	0.12887	-0.0407061	1.21302	0.909878	NA
CG12848	283.208	-1.27195	0.167741	2.54424e-15	1.48185e-14
CG12849	0	0	1.71398	NA	NA
CG12858	371.55	-0.270637	0.126311	0.0284911	0.0465661
CG12859	737.903	0.0604016	0.123712	0.618149	0.689842
CG12861	0.972606	0.34103	1.19156	0.399634	0.485725
CG12863	94.8204	-0.838709	0.231021	8.32588e-05	0.000198419
CG12866	0.324382	-0.140799	1.23235	0.700348	NA
CG12869	241.96	1.36377	0.175818	5.10819e-16	3.09874e-15
CG12880	9.57976	0.336134	0.632797	0.38147	0.467432
CG12895	301.459	-2.00674	0.203007	9.15643e-25	8.7905e-24
CG12909	93.9206	-1.4488	0.254159	5.74277e-10	2.25088e-09
CG1291	1533.99	1.732	0.0890568	8.89733e-86	4.45278e-84
CG12913	28.0069	-0.382399	0.365745	0.2089	0.278379
CG12914	0	0	1.71398	NA	NA
CG12920	0	0	1.71398	NA	NA
CG12926	296.729	0.36821	0.203066	0.0546697	0.0845464
CG12929	99.5783	-0.81615	0.283135	0.00120578	0.00245656
CG12935	98.0531	-0.875056	0.228763	3.46064e-05	8.61177e-05
CG12948	244.103	-0.940445	0.168585	5.33239e-09	1.92657e-08
CG12963	2.42047	0.256671	0.827304	0.509072	0.593259
CG12975	90.1938	0.0509278	0.213497	0.799609	0.840344
CG12984	0.486036	-0.0521897	1.08899	0.888267	0.915953
CG12985	15.8299	-1.62506	0.647978	0.000452793	0.000977375
CG12986	0.337494	0.198453	1.26382	0.592503	NA
CG12995	0.130176	-0.0407061	1.21302	0.909878	NA
CG13000	0	0	1.71398	NA	NA
CG13004	56.1062	0.842071	0.302476	0.0015135	0.00303993
CG13005	116.626	-0.988695	0.245741	1.06628e-05	2.81409e-05
CG13010	2.32813	0.250022	0.757734	0.516939	0.600227
CG13012	203.216	2.52923	0.212507	1.81965e-34	2.61575e-33
CG13014	327.702	0.316892	0.149476	0.0287304	0.0469147
CG13016	261.194	-0.118453	0.148034	0.409707	0.495961
CG13018	47.5049	-0.562091	0.299687	0.0332453	0.0534318
CG13023	2.14032	-1.56451	1.72117	0.0235338	0.0389826
CG13024	564.687	0.732024	0.127173	3.55818e-09	1.3021e-08
CG13026	2.60537	0.606409	0.893546	0.166075	0.227884
CG13028	0.427794	-0.0349152	1.10488	0.924808	0.940999
CG13029	1.34499	0.371305	1.05788	0.366579	0.452676
CG13033	0	0	1.71398	NA	NA
CG13041	0.531163	0.316931	1.26242	0.42297	0.507808
CG13045	0	0	1.71398	NA	NA
CG13046	0	0	1.71398	NA	NA
CG13054	0	0	1.71398	NA	NA
CG13055	1.45157	0.781549	1.27479	0.117084	0.167373
CG13063	0	0	1.71398	NA	NA
CG13064	0	0	1.71398	NA	NA
CG13069	0.130176	-0.0407061	1.21302	0.909878	NA
CG1307	823.327	0.827921	0.10717	3.54531e-15	2.02992e-14
CG13071	0	0	1.71398	NA	NA
CG13081	0.337494	0.198453	1.26382	0.592503	NA
CG13082	6.01142	0.338915	0.593113	0.371054	0.457783
CG13083	11.18	-0.42184	1.26484	0.314727	0.397459
CG13088	81.5666	-0.77286	0.251479	0.000739818	0.00155109
CG1309	3869.03	0.367227	0.0920113	5.36639e-05	0.000130891
CG13090	831.923	2.59957	0.111669	1.21991e-121	9.84124e-120
CG13097	247.974	-1.16161	0.185277	3.84108e-11	1.63731e-10
CG13101	2144.78	1.49725	0.21769	2.60588e-13	1.31021e-12
CG13108	18.8996	2.55906	0.737933	7.86691e-06	2.10603e-05
CG1311	2344.28	0.664893	0.0813276	1.46116e-16	9.13017e-16
CG13110	0	0	1.71398	NA	NA
CG13114	40.0759	-0.688163	1.35242	0.152922	0.212207
CG13116	406.866	0.0203604	0.145926	0.885806	0.914396
CG13117	181.993	0.086054	0.194905	0.641932	0.710992
CG13126	105.683	-1.81598	0.240507	1.04452e-15	6.21763e-15
CG13127	0.809154	-0.494744	1.21688	0.257382	0.33385
CG13133	37.4008	-0.908056	0.373418	0.00340884	0.00646257
CG13148	2.0127	-0.324957	0.857514	0.413817	0.499594
CG13151	195.791	0.0796219	0.204556	0.680251	0.744713
CG13154	0.130176	-0.0407061	1.21302	0.909878	NA
CG13157	0	0	1.71398	NA	NA
CG13168	0.718855	-0.217717	1.0113	0.574658	0.652938
CG13170	0.130176	-0.0407061	1.21302	0.909878	NA
CG13171	0	0	1.71398	NA	NA
CG13177	7.45031	1.57166	0.953732	0.00492366	0.00907673
CG13183	4.54557	0.0219454	0.600841	0.952631	0.961166
CG13185	1269.84	-0.445954	0.107692	2.54556e-05	6.42931e-05
CG13186	0.362416	0.207207	1.2669	0.577528	NA
CG1319	541.038	0.310463	0.12341	0.0101795	0.0179102
CG13192	200.537	-1.35273	0.177612	1.57621e-15	9.29051e-15
CG13193	0.386611	-0.169433	1.24225	0.645862	NA
CG13204	183.595	-0.691155	0.190617	0.000128031	0.00029819
CG13215	44.7384	5.69758	0.743778	1.59079e-15	9.36624e-15
CG13216	0	0	1.71398	NA	NA
CG13220	657.369	-0.0673646	0.124213	0.579722	0.657448
CG13228	0	0	1.71398	NA	NA
CG13229	106.895	0.890077	0.233799	3.55463e-05	8.83752e-05
CG13230	0	0	1.71398	NA	NA
CG13231	0.48473	-0.0515223	1.08924	0.889675	0.916462
CG13239	1.32905	-0.849456	1.39333	0.101744	0.147906
CG1324	0.674988	0.314178	1.31924	0.419352	0.504697
CG13244	0.12887	-0.0407061	1.21302	0.909878	NA
CG13247	8.92436	-3.40293	1.47972	0.00033243	0.000733083
CG13248	161.967	-1.55121	0.195975	9.4802e-17	5.98604e-16
CG13255	124.413	1.36179	0.237938	6.23249e-10	2.43576e-09
CG13258	5.03607	0.334533	0.63356	0.383727	0.469559
CG13272	0	0	1.71398	NA	NA
CG13282	10.577	0.545936	0.516005	0.13898	0.194658
CG13285	231.454	2.56719	0.193757	7.39914e-42	1.37905e-40
CG13293	64.6244	0.0943588	0.269786	0.699113	0.760451
CG13295	587.73	0.142533	0.101185	0.153178	0.212507
CG13296	0.235447	0.130421	1.23553	0.720184	NA
CG13297	4.61826	1.00884	0.957626	0.042943	0.0675319
CG13298	473.996	-0.109478	0.126243	0.375518	0.462276
CG13305	0	0	1.71398	NA	NA
CG13306	11.3075	-0.0434939	0.48401	0.901237	0.924323
CG13309	0.168747	0.130421	1.23553	0.720184	NA
CG13310	24.388	1.17188	0.617443	0.00608453	0.0110805
CG13311	0.168747	0.130421	1.23553	0.720184	NA
CG13312	0.130176	-0.0407061	1.21302	0.909878	NA
CG13313	2.27624	-1.0674	1.35057	0.0565148	0.0871246
CG13314	1.73407	-0.174303	0.816721	0.647159	0.715316
CG13315	145.15	-1.18437	0.271167	1.26201e-06	3.70312e-06
CG13318	768.168	2.78562	0.134746	1.42468e-96	8.02124e-95
CG13321	4.25589	0.0239228	0.718238	0.948879	0.958455
CG13323	1.81592	-0.461645	0.977849	0.275028	0.354273
CG13326	0.324382	-0.140799	1.23235	0.700348	NA
CG13330	0.494494	-0.0368756	1.08273	0.920882	0.938772
CG13332	149.501	-4.77477	0.341244	3.54609e-45	7.40023e-44
CG13334	0.934035	0.20452	1.03994	0.596409	0.671162
CG13339	207.025	-0.320306	0.177238	0.0589945	0.0906382
CG13344	188.515	0.682848	0.172082	3.31727e-05	8.27403e-05
CG13358	2.50852	0.675036	1.00033	0.14067	0.196777
CG13360	209.063	-0.896443	0.215891	8.20881e-06	2.18996e-05
CG13361	1.07077	-0.333654	1.08036	0.410234	0.496265
CG13362	0.714374	-0.149442	1.13309	0.691327	0.754432
CG13365	213.603	-0.413675	0.151446	0.00477009	0.00881749
CG13367	298.744	-1.457	0.152329	5.27029e-23	4.67749e-22
CG13369	768.527	-0.49763	0.12355	3.81486e-05	9.44108e-05
CG13373	83.2295	-0.645751	0.244081	0.00389981	0.00731776
CG13375	18.9291	-0.39974	0.457876	0.248187	0.323113
CG13377	2263.62	-0.456354	0.154564	0.00224553	0.00439273
CG13384	623.145	-0.366533	0.116204	0.00130508	0.00264732
CG1339	3.05937	-0.348217	0.731104	0.376326	0.462808
CG13390	134.755	-1.71989	0.239293	1.85161e-14	1.01091e-13
CG13392	188.305	-0.121214	0.203778	0.528964	0.610648
CG13397	455.848	-5.51209	0.253871	1.81818e-105	1.16991e-103
CG13398	205.693	0.169037	0.173668	0.310405	0.392729
CG13403	1.42149	-0.712187	1.39127	0.144081	0.201178
CG13405	1.03085	0.429766	1.15882	0.309873	0.39231
CG13408	9.74161	-1.00757	0.696183	0.0228088	0.0378746
CG13409	149.727	0.147904	0.177011	0.383136	0.46899
CG13426	4.99091	-2.68467	1.77002	0.00279322	0.00537463
CG13436	8.78023	-0.193868	0.562178	0.598792	0.673003
CG13437	60.7435	-0.706923	0.292013	0.00623282	0.0113353
CG13443	0	0	1.71398	NA	NA
CG13445	0.193669	0.130421	1.23553	0.720184	NA
CG13454	0.833311	0.607853	1.31956	0.188706	0.254734
CG13458	29.1854	-3.95427	0.669914	3.36937e-10	1.33809e-09
CG13465	0	0	1.71398	NA	NA
CG13473	1.62673	0.376765	0.911285	0.354447	0.4393
CG13477	0.257741	-0.113007	1.22535	0.755829	NA
CG13484	89.6166	-0.499996	0.240408	0.0238924	0.0395282
CG13488	3.49926	-2.88312	1.95635	0.00274455	0.0052904
CG13500	0.292367	-0.127891	1.22877	0.725816	NA
CG13501	0	0	1.71398	NA	NA
CG13506	1738.97	0.622092	0.101712	5.19292e-10	2.04575e-09
CG13510	85.1996	-0.393002	0.279176	0.116438	0.166575
CG13516	424.754	0.514416	0.125116	2.58923e-05	6.53352e-05
CG13526	0.168747	0.130421	1.23553	0.720184	NA
CG13531	2193.48	0.796328	0.0899054	2.8708e-19	2.07442e-18
CG13532	90.1933	0.82377	0.225761	8.10898e-05	0.000193506
CG13538	1.00597	-0.618174	1.27519	0.183118	0.248431
CG13539	0	0	1.71398	NA	NA
CG13541	0	0	1.71398	NA	NA
CG13544	0.81751	-0.190058	1.13487	0.618241	0.689842
CG13557	0	0	1.71398	NA	NA
CG13558	0	0	1.71398	NA	NA
CG13559	1.76549	-0.07418	0.760345	0.842963	0.879409
CG13563	16.2447	-0.279125	0.416808	0.395778	0.481797
CG13564	0	0	1.71398	NA	NA
CG13565	1.36712	-0.548783	1.11241	0.217294	0.287932
CG13566	3.68211	0.364384	0.683685	0.351757	0.436767
CG13575	66.958	-1.3431	0.322307	1.97894e-06	5.68643e-06
CG13578	582.638	-1.21762	0.153609	1.98605e-16	1.22962e-15
CG1358	206.526	2.59116	0.217719	1.9466e-34	2.79081e-33
CG13581	0	0	1.71398	NA	NA
CG13585	1183.12	-0.228634	0.114012	0.0412004	0.0649804
CG13599	18.587	-1.24424	0.577777	0.00274875	0.00529662
CG1360	63.682	0.131086	0.253417	0.572098	0.650932
CG13601	339.576	-0.536358	0.137027	5.72399e-05	0.00013911
CG13605	1118.06	0.319196	0.104457	0.00191772	0.00378848
CG13607	216.996	-2.98635	0.243673	5.51761e-36	8.52076e-35
CG13613	0	0	1.71398	NA	NA
CG13622	16.523	0.94867	0.494024	0.01056	0.0185075
CG13623	250.809	1.11424	0.158478	2.53026e-13	1.27456e-12
CG13630	608.154	-0.508462	0.109379	2.23647e-06	6.3756e-06
CG13634	1.55347	-1.05731	1.49291	0.0632047	0.0964214
CG13639	41.9444	-4.88203	0.693548	2.84716e-13	1.42754e-12
CG13640	7.88645	-3.13596	1.51513	0.000622587	0.00131809
CG13653	0	0	1.71398	NA	NA
CG13663	457.447	0.4382	0.149093	0.00241204	0.00469128
CG13667	239.244	-0.566464	0.157787	0.00019559	0.000444188
CG13671	647.808	0.145983	0.109935	0.177039	0.241214
CG13676	21.3569	1.13729	0.49844	0.00261811	0.00506112
CG13685	58.3353	-1.0283	0.345504	0.000472444	0.00101776
CG13689	115.832	0.229001	0.223543	0.27239	0.351209
CG13690	33.6894	1.27192	0.773723	0.00844364	0.0150521
CG13692	6.9672	-1.86218	1.40486	0.00759012	0.0136294
CG13704	21.1101	-2.48222	0.693066	5.07984e-06	1.38529e-05
CG1371	2125.06	-0.645666	0.115669	1.21727e-08	4.28621e-08
CG13712	0.193669	0.130421	1.23553	0.720184	NA
CG13713	1.1755	0.0259029	0.895839	0.944806	0.955948
CG13723	0	0	1.71398	NA	NA
CG13724	0	0	1.71398	NA	NA
CG13725	0	0	1.71398	NA	NA
CG13728	0.130176	-0.0407061	1.21302	0.909878	NA
CG13737	38.9568	2.74996	0.412046	4.80927e-13	2.36525e-12
CG13742	126.944	-4.47835	0.364385	2.29111e-35	3.33786e-34
CG13747	0.168747	0.130421	1.23553	0.720184	NA
CG13748	6.14664	0.643908	0.744416	0.12889	0.182322
CG13751	277.162	-0.0463714	0.171108	0.777936	0.823652
CG13759	1.02094	-0.0985349	0.935579	0.793782	0.835682
CG13766	119.524	-0.592739	0.202839	0.00190674	0.00376817
CG13771	0.297617	0.0440678	1.21345	0.902494	NA
CG13773	171.186	0.512436	0.174385	0.0021313	0.00418288
CG13786	0	0	1.71398	NA	NA
CG13801	0.168747	0.130421	1.23553	0.720184	NA
CG13806	0.168747	0.130421	1.23553	0.720184	NA
CG13807	206.593	-1.34069	0.225734	1.80247e-10	7.33611e-10
CG13810	1.20018	-0.72611	1.33898	0.138255	0.193794
CG13829	3.53162	-1.77592	1.64221	0.0138712	0.0239457
CG13837	0	0	1.71398	NA	NA
CG13838	0	0	1.71398	NA	NA
CG13841	1185.48	-2.04277	0.131895	7.74565e-56	2.12514e-54
CG13843	3.93201	1.36102	1.30333	0.0241018	0.0398258
CG13856	359.54	-2.37474	0.186266	4.60972e-39	7.73774e-38
CG13857	0	0	1.71398	NA	NA
CG13862	0	0	1.71398	NA	NA
CG13865	754.143	-0.469208	0.110893	1.65337e-05	4.25748e-05
CG13870	1.68889	-0.716254	1.18884	0.136111	0.191285
CG13872	0.12887	-0.0407061	1.21302	0.909878	NA
CG13875	278.098	1.74614	0.153515	1.57375e-31	1.98741e-30
CG13887	4997.35	1.20093	0.0703135	1.92625e-66	6.58948e-65
CG13891	0.922228	-0.104	0.994096	0.782724	0.827102
CG13893	1845.75	2.10549	0.11899	7.89481e-72	3.04796e-70
CG13895	266.336	-0.136317	0.153718	0.35975	0.445165
CG13898	0.130176	-0.0407061	1.21302	0.909878	NA
CG13900	3089.51	0.0598811	0.0758788	0.426421	0.510364
CG13901	185.906	0.879855	0.194971	1.69018e-06	4.89836e-06
CG13902	266.315	-0.598726	0.151663	4.39447e-05	0.000108111
CG13905	0.12887	-0.0407061	1.21302	0.909878	NA
CG13907	2865.45	1.35733	0.132443	7.12318e-26	7.12977e-25
CG13912	47.5399	-0.635827	0.353931	0.0328053	0.0528188
CG13917	5592.64	-0.380357	0.102724	0.000170995	0.00039129
CG13919	157.205	0.226813	0.203804	0.238592	0.312477
CG13920	129.577	-0.315541	0.273482	0.200462	0.268325
CG13924	11.0065	0.00127429	0.469615	0.997065	0.997434
CG13926	195.255	0.488908	0.16839	0.00248654	0.00482923
CG13931	0.292367	-0.127891	1.22877	0.725816	NA
CG1394	0.763982	0.115498	1.10581	0.757825	0.808377
CG13949	10.6951	-0.487928	0.580692	0.20375	0.272187
CG13955	65.7255	-8.54299	1.23972	3.21978e-14	1.71626e-13
CG13957	795.914	0.929466	0.098501	8.91198e-22	7.4797e-21
CG13970	0.419932	-0.189818	1.22959	0.611326	0.684335
CG13983	3.85797	4.03667	1.88064	0.000402475	0.000874699
CG13992	6.79507	0.0491451	0.671541	0.895143	0.919994
CG13993	1443.17	3.5585	0.185402	6.01568e-83	2.87741e-81
CG13994	339.032	0.94889	0.183724	5.13304e-08	1.72753e-07
CG13998	0.130176	-0.0407061	1.21302	0.909878	NA
CG14000	0	0	1.71398	NA	NA
CG14005	277.858	0.487163	0.167099	0.00240104	0.00467325
CG14010	110.617	-0.40444	0.209723	0.0401522	0.0634383
CG14013	0.168747	0.130421	1.23553	0.720184	NA
CG14014	0	0	1.71398	NA	NA
CG1402	2.6505	0.0399768	0.692119	0.914668	0.934052
CG14020	45.2899	-0.861231	0.325849	0.0021705	0.00425365
CG14022	42.1348	-1.87451	0.432919	3.18905e-07	9.95196e-07
CG14024	22.292	0.047181	0.400433	0.883086	0.911938
CG14034	9.74073	-1.69498	0.966355	0.0032035	0.00611403
CG14036	2.20661	-0.136304	0.983071	0.719534	0.777039
CG14040	436.574	0.394621	0.145426	0.00517142	0.00951704
CG14044	112.291	-1.34053	0.223771	1.31577e-10	5.39585e-10
CG14050	22.4537	-3.00162	0.647517	7.67721e-08	2.55828e-07
CG14062	0	0	1.71398	NA	NA
CG14069	135.152	9.88162	1.45197	4.366e-14	2.30903e-13
CG14070	3.39351	3.59536	1.97025	0.000935861	0.00193509
CG14071	0.99937	0.144592	1.07817	0.702513	0.76309
CG14072	0.291061	-0.127332	1.22862	0.726931	NA
CG14077	1.48338	0.92154	1.55299	0.0880936	0.129988
CG14089	0.323845	0.0440678	1.21345	0.902494	NA
CG1409	0	0	1.71398	NA	NA
CG14102	118.273	-0.626003	0.200806	0.000935142	0.00193434
CG14106	3.82964	0.301511	0.699822	0.436439	0.520855
CG14107	0.193669	0.130421	1.23553	0.720184	NA
CG14110	0	0	1.71398	NA	NA
CG14131	89.1596	-0.807827	0.240095	0.000245076	0.000549186
CG14132	53.6951	1.17398	0.405036	0.000394844	0.000860189
CG14135	169.581	-0.556794	0.183993	0.00147221	0.00296362
CG14137	0.404194	0.230612	1.26183	0.54092	0.621925
CG14147	0.833311	0.607853	1.31956	0.188706	0.254734
CG14154	0	0	1.71398	NA	NA
CG1416	1501.48	-0.608404	0.144121	1.33003e-05	3.46283e-05
CG14174	88.3613	-3.45972	0.34482	1.00345e-24	9.58238e-24
CG1418	562.074	0.889023	0.133214	6.5173e-12	2.94778e-11
CG14183	18.6851	-0.351183	0.470478	0.31554	0.398201
CG14184	827.963	0.129069	0.139845	0.343204	0.428015
CG14185	13.0692	0.527079	0.543934	0.161594	0.222469
CG14187	3.10005	-0.315951	0.841776	0.424837	0.509484
CG14194	605.215	-0.119507	0.161002	0.441916	0.526693
CG14195	0	0	1.71398	NA	NA
CG14196	224.543	-0.901399	0.155461	1.67374e-09	6.34402e-09
CG14212	2.26838	-1.78259	1.77223	0.0157883	0.0270735
CG14229	94.8214	-1.53704	0.271024	5.57975e-10	2.19335e-09
CG14231	117.115	-0.56304	0.245848	0.0124682	0.0216033
CG14232	511.256	0.665077	0.114215	2.83281e-09	1.04586e-08
CG14244	0	0	1.71398	NA	NA
CG14247	0	0	1.71398	NA	NA
CG14258	17.0522	-0.127962	0.45595	0.708728	0.767824
CG14259	11712.3	-1.10879	0.08089	1.14048e-43	2.3001e-42
CG14260	1.2335	-0.593533	1.33176	0.195964	0.26276
CG14269	1.13933	0.483888	1.17489	0.265103	0.342959
CG1427	916.6	-0.918421	0.118517	2.20169e-15	1.28373e-14
CG14270	210.941	-0.448535	0.175642	0.00760792	0.0136532
CG14273	0.531163	0.316931	1.26242	0.42297	0.507808
CG14274	13.0318	3.52595	0.897215	2.36718e-06	6.71987e-06
CG14275	668.692	-1.9617	0.135201	2.17317e-49	5.17445e-48
CG14282	3.33919	-2.90614	1.92603	0.00251989	0.00488698
CG14291	390.77	0.756919	0.143588	5.20397e-08	1.75031e-07
CG14292	0.491286	0.155802	1.11403	0.680368	0.744713
CG14298	91.2381	-0.00187837	0.25189	0.99351	0.994983
CG14300	0	0	1.71398	NA	NA
CG14305	0.387917	-0.17383	1.23485	0.638793	NA
CG14309	42.2511	-0.733358	1.37656	0.13637	0.191549
CG14312	4.20004	0.187769	0.635893	0.617565	0.689799
CG14317	0.259047	-0.113604	1.22547	0.754613	NA
CG14321	6.78333	-0.632779	0.692751	0.127046	0.179902
CG14323	0	0	1.71398	NA	NA
CG14326	0.193669	0.130421	1.23553	0.720184	NA
CG14327	0	0	1.71398	NA	NA
CG14329	3.31637	-1.08225	1.25143	0.0496984	0.0775013
CG14330	0	0	1.71398	NA	NA
CG14331	11.0688	-5.7702	1.35413	7.45913e-07	2.23857e-06
CG14342	0.461114	-0.0513545	1.09696	0.889902	0.916462
CG14346	0	0	1.71398	NA	NA
CG14352	76.7347	0.551105	0.276995	0.026481	0.0434649
CG14353	164.459	-0.736332	0.190527	4.41831e-05	0.000108649
CG14362	0.12887	-0.0407061	1.21302	0.909878	NA
CG14367	315.372	-1.00543	0.15935	4.96687e-11	2.10062e-10
CG14369	0	0	1.71398	NA	NA
CG14380	0.130176	-0.0407061	1.21302	0.909878	NA
CG14383	0	0	1.71398	NA	NA
CG14391	0.387917	-0.17383	1.23485	0.638793	NA
CG14397	0.162191	-0.0407061	1.21302	0.909878	NA
CG1440	3750.69	0.436137	0.0736609	2.41308e-09	8.97023e-09
CG14400	37.4932	-0.962362	0.368595	0.00176147	0.00350413
CG14402	0.330938	0.0440678	1.21345	0.902494	NA
CG14407	585.853	-0.254329	0.140906	0.0635763	0.096879
CG1441	2389.85	-1.89087	0.101953	2.01603e-78	9.00549e-77
CG14417	7.84181	-5.15736	1.46619	1.10605e-05	2.91479e-05
CG14427	0	0	1.71398	NA	NA
CG1444	10001.1	-0.280796	0.0963657	0.00316129	0.006042
CG14441	1839.43	0.153001	0.107212	0.14717	0.205172
CG14448	1.10938	-0.419258	1.05904	0.317535	0.400438
CG14450	303.956	0.721033	0.160799	3.07015e-06	8.59356e-06
CG14455	0	0	1.71398	NA	NA
CG14464	657.367	2.86076	0.175155	1.58451e-61	5.0378e-60
CG14476	17736.1	0.248004	0.0891384	0.00491023	0.00905795
CG14478	1204.86	0.223343	0.100681	0.0244858	0.0403929
CG14480	576.783	-0.245672	0.142864	0.076939	0.115259
CG14482	541.22	0.0242508	0.237534	0.912185	0.932978
CG14483	302.145	0.675506	0.190684	0.000182847	0.000417284
CG14490	5.25575	-0.120421	0.613605	0.746154	0.797835
CG14491	0.808389	0.484746	1.31131	0.262734	0.340301
CG14492	0	0	1.71398	NA	NA
CG14500	3.37991	-0.354629	0.828329	0.375196	0.462049
CG14502	1.08448	-0.151095	0.880232	0.690934	0.754404
CG14505	7.67761	0.242649	0.585546	0.515869	0.599703
CG14507	4.11237	-0.505296	0.714174	0.214283	0.28464
CG14508	51.3421	-2.2803	0.377666	2.32558e-11	1.00639e-10
CG14512	143.556	0.433639	0.207974	0.0266034	0.0436392
CG14515	311.882	-8.36561	0.753502	6.92533e-31	8.56553e-30
CG14518	458.288	-0.960591	0.13404	1.59112e-13	8.12086e-13
CG14523	148.843	0.264328	0.180332	0.125205	0.177768
CG14535	63.6977	0.427591	0.250585	0.0622562	0.0951625
CG14537	0.493129	-0.0573025	1.16793	0.87548	0.90564
CG14543	125.922	-1.2132	0.246945	8.21789e-08	2.7334e-07
CG14544	40.4598	-0.0532217	0.313293	0.845816	0.881704
CG14551	0.297617	0.0440678	1.21345	0.902494	NA
CG14561	15.9678	0.356615	0.476243	0.310886	0.393246
CG14564	0	0	1.71398	NA	NA
CG14565	0.493129	-0.0573025	1.16793	0.87548	0.90564
CG14566	1.71966	0.316323	0.998885	0.430526	0.514366
CG14567	1774.78	0.098392	0.166141	0.538619	0.620072
CG14568	2.7753	0.207257	0.773414	0.587998	0.66377
CG14569	0	0	1.71398	NA	NA
CG14570	0.12887	-0.0407061	1.21302	0.909878	NA
CG14572	7.58837	-0.657308	0.704356	0.116464	0.166575
CG14573	0.130176	-0.0407061	1.21302	0.909878	NA
CG14579	0	0	1.71398	NA	NA
CG14589	11.6168	-0.502188	0.640497	0.204888	0.273505
CG14590	202.086	1.73024	0.195842	2.81711e-20	2.16285e-19
CG14598	0.260352	-0.114199	1.22559	0.753402	NA
CG14607	1.14667	0.0207982	0.856369	0.955633	0.963117
CG1461	2404.31	-3.32942	0.333189	1.16572e-24	1.10928e-23
CG14613	323.328	1.76371	0.143929	4.39013e-36	6.81858e-35
CG14618	348.003	1.05334	0.135252	1.02836e-15	6.14175e-15
CG14624	0	0	1.71398	NA	NA
CG14625	11.0139	-5.78895	1.33338	5.41961e-07	1.6531e-06
CG14626	95.0317	-4.66729	0.572759	6.54695e-17	4.19766e-16
CG14627	4.02943	-2.93049	2.03783	0.00286453	0.0054962
CG14629	786.487	-1.06857	0.225109	2.97628e-07	9.32026e-07
CG1463	77.4381	-1.39843	0.306137	2.71325e-07	8.51138e-07
CG14636	348.11	3.07501	0.15596	7.43148e-88	3.86223e-86
CG14644	1.00206	0.763431	1.39733	0.126619	0.179391
CG14645	1.16114	-0.549943	1.3171	0.220283	0.291634
CG14646	832.163	0.691825	0.0981178	8.21907e-13	3.97709e-12
CG14650	1577.52	0.756865	0.0845153	1.32878e-19	9.73175e-19
CG14651	0.387917	-0.17383	1.23485	0.638793	NA
CG14657	372.558	-0.15523	0.121718	0.193138	0.259292
CG14659	0	0	1.71398	NA	NA
CG14664	0.130176	-0.0407061	1.21302	0.909878	NA
CG14667	284.915	0.233524	0.153158	0.115301	0.165306
CG14671	334.951	0.334725	0.147264	0.0191274	0.0322872
CG14676	9.5018	-4.40392	1.52137	6.7001e-05	0.000161023
CG14684	0	0	1.71398	NA	NA
CG14687	1133.46	0.622659	0.164648	8.19995e-05	0.00019559
CG14695	168.107	1.16105	0.198835	5.58865e-10	2.19525e-09
CG14701	82.3408	-0.115073	0.293719	0.659091	0.726128
CG14708	0	0	1.71398	NA	NA
CG14710	191.407	-0.373403	0.195364	0.0437125	0.068662
CG14715	204.894	-2.23429	0.190611	1.50456e-33	2.08516e-32
CG14720	0.583428	-0.337158	1.17072	0.404913	0.490818
CG14722	556.334	-0.452166	0.114063	5.36341e-05	0.000130877
CG14731	0	0	1.71398	NA	NA
CG14749	406.32	-0.576532	0.123404	1.7588e-06	5.08903e-06
CG14752	1.62169	-0.554319	1.17705	0.216423	0.287129
CG14757	469.888	0.7735	0.119192	3.19268e-11	1.36956e-10
CG14759	0	0	1.71398	NA	NA
CG14760	0	0	1.71398	NA	NA
CG14767	5422.66	0.582232	0.0761794	1.25843e-14	6.98339e-14
CG14770	14.88	-6.25939	1.29555	4.70709e-08	1.58813e-07
CG14780	1.4259	-0.968066	1.44279	0.0768664	0.115182
CG14795	24.4662	-3.20829	0.703215	1.33965e-07	4.36109e-07
CG14803	375.768	-0.388972	0.12977	0.00214223	0.00420281
CG14805	700.798	-1.42028	0.138593	6.15466e-26	6.18326e-25
CG14806	441.628	-0.391389	0.17345	0.0185427	0.0313983
CG14812	269.858	1.11044	0.175964	3.47857e-11	1.48747e-10
CG14814	133.189	-0.806621	0.40931	0.0141965	0.0244681
CG14817	209.861	-1.07434	0.173243	7.89262e-11	3.27899e-10
CG14818	1084.18	-0.12295	0.132993	0.343636	0.428384
CG14820	1.69638	0.863011	1.3446	0.0966321	0.141238
CG14823	52.2254	-1.67894	0.428088	2.63002e-06	7.41925e-06
CG14826	0.362416	0.207207	1.2669	0.577528	NA
CG14829	0	0	1.71398	NA	NA
CG14830	4751.84	-1.31149	0.113874	7.20509e-32	9.22832e-31
CG14837	165.653	-0.338342	0.187621	0.0581684	0.0894962
CG14839	0	0	1.71398	NA	NA
CG14851	0.454021	-0.0298752	1.17536	0.934555	0.948595
CG14853	62.7991	-0.977118	0.288991	0.000137882	0.000319714
CG14854	799.026	0.49209	0.112026	7.68658e-06	2.06081e-05
CG14855	21.5399	-1.51173	0.560921	0.000320276	0.000706856
CG14857	12.0831	0.38127	0.543533	0.30435	0.386244
CG1486	3895.2	0.417292	0.0808124	1.86663e-07	5.95932e-07
CG14860	20.5506	0.138559	0.392825	0.662538	0.729481
CG14870	39.3444	2.1844	0.568097	1.9148e-06	5.51389e-06
CG14879	110.671	-0.0882132	0.23183	0.682134	0.746192
CG14905	1.89543	-0.460528	0.958253	0.27474	0.353986
CG14913	0	0	1.71398	NA	NA
CG14915	0	0	1.71398	NA	NA
CG1492	64.6531	-2.10627	0.328824	2.4737e-12	1.16467e-11
CG14921	1.88387	0.339709	0.850513	0.394736	0.480857
CG14931	13.8118	-0.0510539	0.940173	0.891663	0.917289
CG1494	6.22643	-4.68223	1.59623	5.72926e-05	0.000139176
CG14945	99.9802	0.816768	0.214619	4.46347e-05	0.000109659
CG14946	8281.1	-0.984658	0.0866353	1.18656e-30	1.45099e-29
CG14958	0	0	1.71398	NA	NA
CG14968	52.7865	0.660388	0.294275	0.0111169	0.0194142
CG14969	676.737	-1.30247	0.116789	4.76158e-30	5.70651e-29
CG14971	788.795	1.04746	0.096041	1.6519e-28	1.83714e-27
CG14985	305.56	0.727606	0.164001	3.76188e-06	1.04272e-05
CG15012	1076.41	0.64867	0.131279	3.92433e-07	1.21414e-06
CG15014	217.228	-0.516671	0.165614	0.00116663	0.00238087
CG15019	332.054	-1.94522	0.199513	3.79391e-24	3.54163e-23
CG15024	0	0	1.71398	NA	NA
CG15027	236.73	0.690116	0.189668	0.000122262	0.000285578
CG15034	0.943275	-0.286273	1.08111	0.471309	0.556692
CG15035	3.24889	-1.68565	1.58961	0.0158466	0.0271649
CG15036	1792.83	4.79933	0.219191	5.96538e-107	3.88468e-105
CG1504	0.897323	0.127069	1.01207	0.737153	0.791481
CG15044	12.7488	4.80435	1.21554	3.17107e-06	8.85769e-06
CG15073	194.396	0.0754861	0.194411	0.682676	0.746633
CG15080	26.1039	1.50541	0.543633	0.000257524	0.000575648
CG15082	197.458	-0.706001	0.16812	1.16095e-05	3.04757e-05
CG15083	1900.32	1.73505	0.124919	2.12451e-45	4.46808e-44
CG15084	136.768	-0.922735	0.221489	7.1164e-06	1.91364e-05
CG15087	692.208	0.720241	0.125302	3.85153e-09	1.40659e-08
CG15093	947.231	-0.0925917	0.118542	0.425963	0.510006
CG15096	1495.56	-0.0733661	0.121813	0.53887	0.620229
CG15097	62.9314	-0.587158	0.282722	0.0199471	0.0335232
CG15098	16360	1.02859	0.0708949	1.75399e-48	4.08633e-47
CG15099	5590.63	0.647568	0.0794845	1.92408e-16	1.19536e-15
CG15100	761.598	-0.204234	0.149095	0.157872	0.218178
CG15109	2.53784	-0.291492	0.865072	0.459279	0.544387
CG15111	1611.04	0.928725	0.0797885	5.98318e-32	7.69978e-31
CG15115	0	0	1.71398	NA	NA
CG15116	0.130176	-0.0407061	1.21302	0.909878	NA
CG15117	557.692	0.902494	0.150888	5.51859e-10	2.17088e-09
CG15120	114.64	-1.18634	0.236086	4.99265e-08	1.68237e-07
CG15125	0	0	1.71398	NA	NA
CG15127	0	0	1.71398	NA	NA
CG15128	2.01408	1.10271	1.45036	0.0553188	0.0854769
CG15130	11.6369	0.600038	0.508067	0.102859	0.149209
CG15136	0.486573	-0.200016	1.25553	0.590963	0.665865
CG15141	237.005	0.010188	0.150662	0.944404	0.955721
CG15142	0.551414	-0.320355	1.16692	0.425157	0.509528
CG15147	0	0	1.71398	NA	NA
CG15152	0.259047	-0.113604	1.22547	0.754613	NA
CG15153	0	0	1.71398	NA	NA
CG15155	10.6547	6.21574	1.34947	1.34944e-07	4.38062e-07
CG1516	19083.5	-0.821172	0.0735619	2.02198e-29	2.35535e-28
CG15161	120.353	-0.600426	0.210183	0.00230246	0.00449758
CG15167	0	0	1.71398	NA	NA
CG15168	581.295	0.913638	0.147254	1.32027e-10	5.41019e-10
CG1518	2466.59	0.882804	0.0779905	2.83371e-30	3.43412e-29
CG15198	0	0	1.71398	NA	NA
CG15201	4111.03	0.0675457	0.133306	0.603721	0.677979
CG15202	822.565	-1.83073	0.108387	1.32853e-65	4.43252e-64
CG15208	1.3749	0.819646	1.50405	0.111126	0.16017
CG15209	174.718	3.03007	0.217771	2.09769e-45	4.42892e-44
CG15210	35.1562	0.561595	0.34861	0.0567394	0.087422
CG15211	1012.62	2.31952	0.16473	7.312e-47	1.61312e-45
CG15213	33.1467	2.90785	0.494407	9.24304e-11	3.83118e-10
CG15219	0.752175	-0.231022	1.0138	0.553218	0.632858
CG15221	0.948498	-0.28805	1.08164	0.468872	0.554178
CG15227	0	0	1.71398	NA	NA
CG15247	119.111	0.506118	0.26926	0.0372179	0.0592526
CG15249	0.168747	0.130421	1.23553	0.720184	NA
CG15255	1.687	0.417163	0.9215	0.312611	0.395243
CG15258	0	0	1.71398	NA	NA
CG15262	0.130176	-0.0407061	1.21302	0.909878	NA
CG15263	0	0	1.71398	NA	NA
CG15269	6.6477	-3.61794	1.66987	0.000439339	0.000950993
CG15279	1933.86	-4.74089	0.13573	5.93323e-268	1.68785e-265
CG15283	0	0	1.71398	NA	NA
CG15296	1.65868	-0.657274	1.17785	0.160783	0.221635
CG15309	156.424	-0.314191	0.219616	0.125989	0.178639
CG15317	92.5976	0.854711	0.22945	5.48996e-05	0.000133784
CG1532	3949.82	0.167322	0.0913364	0.0638993	0.0973438
CG15322	37.0778	-4.18362	0.609406	9.44246e-13	4.55683e-12
CG15330	0	0	1.71398	NA	NA
CG15337	17.2264	-4.39333	1.00676	7.0969e-07	2.13223e-06
CG15347	282.893	1.75946	0.153786	7.16957e-32	9.20463e-31
CG15357	0	0	1.71398	NA	NA
CG15358	0	0	1.71398	NA	NA
CG15369	54.6224	3.33602	0.41792	8.73766e-17	5.53658e-16
CG15370	1.70124	-0.150686	0.82286	0.691037	0.754404
CG15373	2.26626	-1.1467	1.64128	0.0545189	0.0843615
CG15387	27.5288	0.191709	0.35125	0.517588	0.600851
CG15390	64.29	0.0430346	0.276055	0.862588	0.894701
CG15394	1422.92	-3.30835	0.0987681	5.02029e-247	1.13061e-244
CG15395	0.404194	0.230612	1.26183	0.54092	0.621925
CG15398	0	0	1.71398	NA	NA
CG15399	5.22757	-2.90386	1.74681	0.00180106	0.00357721
CG15403	0	0	1.71398	NA	NA
CG15404	0	0	1.71398	NA	NA
CG15414	3.98169	0.259537	0.703088	0.499449	0.58406
CG1542	247.566	-0.669928	0.172744	4.96717e-05	0.000121482
CG15422	1.84714	-1.35399	1.62043	0.0343258	0.0550537
CG15423	9.52563	-5.33223	1.53895	1.20009e-05	3.14268e-05
CG15425	0.235447	0.130421	1.23553	0.720184	NA
CG15429	0.12887	-0.0407061	1.21302	0.909878	NA
CG15432	158.604	-0.140268	0.199982	0.458775	0.543909
CG15434	0.297617	0.0440678	1.21345	0.902494	NA
CG15435	122.699	0.0570321	0.225	0.785905	0.82902
CG15439	423.181	0.807764	0.118341	2.94204e-12	1.3732e-11
CG15440	447.312	0.18	0.14785	0.209687	0.279359
CG15445	1229.15	0.193473	0.0943197	0.0378617	0.0601713
CG15450	0	0	1.71398	NA	NA
CG15452	0	0	1.71398	NA	NA
CG15458	0.12887	-0.0407061	1.21302	0.909878	NA
CG15461	0.429116	0.244666	1.26033	0.519853	0.602187
CG15471	0	0	1.71398	NA	NA
CG15475	0.387917	-0.17383	1.23485	0.638793	NA
CG15479	7.69802	-3.05655	1.49234	0.000669828	0.00141202
CG15480	0.386611	-0.169433	1.24225	0.645862	NA
CG15483	0	0	1.71398	NA	NA
CG15485	0.162191	-0.0407061	1.21302	0.909878	NA
CG15497	67.4793	-8.59898	1.22763	1.39637e-14	7.70141e-14
CG1550	737.166	-0.0647995	0.0961368	0.494914	0.579759
CG15506	211.568	5.39698	0.319588	7.13603e-65	2.36627e-63
CG15515	4.18297	-3.61051	1.86341	0.000734426	0.00154098
CG1552	0.728039	0.322375	1.07595	0.424062	0.508729
CG15522	25.6261	0.165604	0.373156	0.590736	0.665865
CG15525	123.589	-0.123787	0.208113	0.527965	0.609625
CG15536	85.8113	-1.18928	0.28149	2.37058e-06	6.72597e-06
CG15537	2.29385	0.486278	0.865103	0.245955	0.320756
CG15543	0	0	1.71398	NA	NA
CG15545	29.3088	-6.31659	1.25295	1.62908e-08	5.68077e-08
CG15548	0.168747	0.130421	1.23553	0.720184	NA
CG15549	0	0	1.71398	NA	NA
CG15550	0.870559	0.358852	1.13489	0.380949	0.467412
CG15554	22.1639	-6.8783	1.26671	1.25164e-09	4.79114e-09
CG15556	2752.15	0.504396	0.0711894	9.45794e-13	4.56023e-12
CG15561	154.238	0.609571	0.187908	0.000630105	0.00133192
CG15571	0.427794	-0.0349152	1.10488	0.924808	0.940999
CG15576	0	0	1.71398	NA	NA
CG15577	0.168747	0.130421	1.23553	0.720184	NA
CG15579	1.29834	-0.814725	1.38012	0.110787	0.159852
CG15594	2.26658	-1.70036	1.76578	0.0185022	0.0313395
CG15602	431.534	-0.685385	0.16944	2.38505e-05	6.04936e-05
CG15605	0	0	1.71398	NA	NA
CG15614	3.9242	1.35136	1.29424	0.0244314	0.0403211
CG15615	2.03505	0.264459	0.812468	0.496669	0.581563
CG15617	1.35994	0.613314	1.24423	0.184906	0.250354
CG15618	316.254	-1.05828	0.157803	2.96623e-12	1.3833e-11
CG15625	2.67208	-0.786714	1.09063	0.104595	0.151564
CG15628	407.274	-0.240015	0.124074	0.0481652	0.0753278
CG15629	45.6601	-2.30266	0.408785	2.62011e-10	1.05292e-09
CG15638	0.453252	-0.206107	1.22569	0.584279	0.660945
CG15641	0	0	1.71398	NA	NA
CG15642	34.3631	0.171515	0.335265	0.550239	0.629754
CG15643	67.2276	0.485114	0.288167	0.0584535	0.0898837
CG15649	0.935357	0.702641	1.3695	0.147472	0.205434
CG15651	79.2743	-0.261046	0.237056	0.233918	0.307548
CG15653	38.5969	-1.49994	0.410079	1.12119e-05	2.94893e-05
CG15657	0	0	1.71398	NA	NA
CG15673	2322.51	0.339276	0.128185	0.00676003	0.0122323
CG15696	6.44482	-4.77878	1.55719	4.01778e-05	9.92055e-05
CG15704	0	0	1.71398	NA	NA
CG15706	278.95	-1.86265	0.162546	4.96012e-32	6.42913e-31
CG1571	2.45346	-0.442777	0.85529	0.283266	0.363411
CG15710	0	0	1.71398	NA	NA
CG15711	0	0	1.71398	NA	NA
CG15712	0	0	1.71398	NA	NA
CG15715	467.464	0.193075	0.165412	0.225557	0.298077
CG15717	261.024	-1.16227	0.208168	2.50974e-09	9.31671e-09
CG15719	0	0	1.71398	NA	NA
CG1572	1875.04	0.0707276	0.129355	0.575944	0.654124
CG15728	0	0	1.71398	NA	NA
CG15734	9.82435	-5.55916	1.38819	2.09395e-06	6.00094e-06
CG15735	877.773	0.708121	0.0981214	2.36489e-13	1.19349e-12
CG15739	35.6646	-1.44772	0.437848	4.77479e-05	0.000116989
CG15743	727.248	1.4122	0.137347	4.40486e-26	4.43357e-25
CG15747	331.486	0.320807	0.153416	0.0306975	0.0497762
CG15754	0	0	1.71398	NA	NA
CG15756	0	0	1.71398	NA	NA
CG15766	89.9781	1.46042	0.285002	1.4027e-08	4.91991e-08
CG15771	1186.52	-0.129589	0.118853	0.266362	0.34424
CG15772	65.0708	0.504891	0.262249	0.0337532	0.0542158
CG15773	6.01661	-0.0362677	0.555726	0.920797	0.938772
CG15800	0.260352	-0.114199	1.22559	0.753402	NA
CG15814	1004.37	0.222908	0.0964751	0.0192716	0.0324697
CG1582	2068.04	0.0526625	0.0802361	0.507921	0.5923
CG15824	16.3276	-1.9958	0.698816	8.90364e-05	0.000211628
CG15829	14.48	-0.317297	0.44913	0.35338	0.43858
CG15863	67.4208	-0.0349259	0.269506	0.886157	0.914584
CG15864	30.7683	-4.04445	0.643624	3.74575e-11	1.59793e-10
CG15865	0.130176	-0.0407061	1.21302	0.909878	NA
CG15873	0.337494	0.198453	1.26382	0.592503	NA
CG15876	0	0	1.71398	NA	NA
CG15877	185.821	-0.338673	0.188528	0.0590179	0.0906484
CG15878	0.548802	-0.258932	1.22057	0.5033	0.587799
CG15890	7622.52	-0.619314	0.121408	1.827e-07	5.83623e-07
CG15891	584.045	0.435175	0.158302	0.00438149	0.00814092
CG15892	28.9886	-0.290552	0.354411	0.32964	0.413965
CG15896	172.987	0.509989	0.176626	0.00251801	0.00488509
CG15905	0	0	1.71398	NA	NA
CG15912	64.9944	-0.176283	0.251076	0.443826	0.528737
CG15914	101.202	-0.301578	0.211617	0.12933	0.182848
CG15923	187.775	-0.999892	0.187539	1.75651e-08	6.1133e-08
CG15925	0	0	1.71398	NA	NA
CG15927	2.81269	0.936284	1.07045	0.0640431	0.097453
CG1597	1281.32	0.170951	0.0943977	0.0667864	0.101172
CG1602	162.744	0.169602	0.180516	0.325886	0.410203
CG1603	330.93	-0.0303426	0.163585	0.847468	0.882509
CG1607	2610.76	3.85703	0.0972652	0	0
CG1620	1208.44	-0.66855	0.0849346	1.72298e-15	1.01006e-14
CG1636	645.847	-0.317007	0.106288	0.00244618	0.00475425
CG1640	5059.57	-0.173859	0.0902756	0.0514871	0.08003
CG1648	8875.25	-0.884906	0.121534	8.78107e-14	4.55486e-13
CG1662	594.368	0.207004	0.127327	0.096449	0.141046
CG1665	740.376	0.550025	0.113789	8.33221e-07	2.48404e-06
CG1667	278.612	-1.82861	0.159713	5.85092e-32	7.54754e-31
CG16704	164.022	3.18949	0.227314	6.0124e-46	1.28956e-44
CG1671	551.572	-0.257064	0.115183	0.0230228	0.0381947
CG16712	9132.52	-1.77907	0.125519	3.60506e-47	8.01866e-46
CG16713	1849.51	2.06058	0.140533	2.01726e-50	4.97867e-49
CG16716	0.298923	0.0440678	1.21345	0.902494	NA
CG16717	228.791	-1.9355	0.188947	2.64164e-26	2.68385e-25
CG16719	0	0	1.71398	NA	NA
CG16721	1923.54	0.068511	0.116483	0.549124	0.629084
CG1673	343.297	-0.43181	0.145288	0.00218993	0.00429016
CG16734	223.63	1.42613	0.166904	6.48339e-19	4.57477e-18
CG16736	7.62896	1.05064	0.74065	0.0215914	0.0360189
CG16739	1.72298	-0.455494	0.946136	0.278343	0.358201
CG16741	0	0	1.71398	NA	NA
CG16743	133.18	-2.13961	0.260788	3.7683e-18	2.54595e-17
CG16749	5.93443	-0.0497455	0.591703	0.89273	0.918038
CG16753	57.3772	-0.929875	0.308699	0.000567228	0.00120608
CG16762	151.916	-4.74659	0.351912	3.79052e-42	7.11381e-41
CG16771	246.018	0.587246	0.143192	2.35302e-05	5.97373e-05
CG16782	11.1155	-4.74383	1.43736	2.2369e-05	5.68694e-05
CG16787	166.754	-0.316931	0.172004	0.0548276	0.0847663
CG16790	197.949	-3.58038	0.232251	1.79648e-54	4.73658e-53
CG16800	0	0	1.71398	NA	NA
CG16812	481.076	-0.230407	0.112879	0.0377765	0.0600711
CG16826	7.56498	-1.24724	1.16131	0.0269858	0.0442263
CG16833	742.335	-0.167087	0.111143	0.126288	0.179016
CG16836	219.758	-1.71744	0.693896	0.000427538	0.000926933
CG16837	0	0	1.71398	NA	NA
CG16854	0	0	1.71398	NA	NA
CG16865	108.86	-0.73591	0.231262	0.00056867	0.00120867
CG16879	1.0401	-0.495155	1.2892	0.256191	0.332544
CG1688	69.4319	-0.558209	0.287862	0.029189	0.0475917
CG16890	158.448	-0.335088	0.191419	0.0653826	0.0992398
CG16892	178.357	0.174861	0.188529	0.330142	0.414403
CG16894	0	0	1.71398	NA	NA
CG16896	324.756	-1.43473	0.143681	8.68413e-25	8.35191e-24
CG16898	3.15025	-0.989826	1.16144	0.0595683	0.0914419
CG1690	0	0	1.71398	NA	NA
CG16926	261.088	-1.78341	0.320782	6.66452e-10	2.5971e-09
CG16935	1646.77	0.377812	0.0980745	9.42001e-05	0.000223019
CG16947	152.807	-0.171647	0.187661	0.337102	0.421292
CG16952	1486.94	0.450005	0.0966887	2.38983e-06	6.77349e-06
CG16956	0.776561	-0.00274183	1.00954	0.994141	0.995245
CG16957	0	0	1.71398	NA	NA
CG16959	938.175	-0.989372	0.133198	2.07136e-14	1.12407e-13
CG16972	844.386	0.518046	0.0989272	1.08098e-07	3.55828e-07
CG16974	4591.19	0.658091	0.069417	1.28192e-21	1.06433e-20
CG16979	1089.16	0.272434	0.0945582	0.00353431	0.00667235
CG1698	462.502	-2.02876	0.193232	1.61461e-27	1.73498e-26
CG16985	338.956	0.0708091	0.180651	0.68197	0.746192
CG16986	307.52	0.47692	0.136129	0.000319793	0.00070608
CG16995	0	0	1.71398	NA	NA
CG17003	0.168747	0.130421	1.23553	0.720184	NA
CG17005	10.7055	1.96115	0.847535	0.000505897	0.00108636
CG17010	1.14534	-0.210096	0.944732	0.586734	0.663035
CG1703	2055.33	-0.336201	0.102961	0.000919105	0.0019048
CG17036	49.0439	0.0378027	0.306787	0.888455	0.915953
CG17047	9.42417	-1.27204	0.795091	0.0092697	0.0164271
CG17048	0	0	1.71398	NA	NA
CG17059	257.453	0.0114787	0.249994	0.960109	0.966639
CG17065	530.71	-0.706483	0.146582	6.2928e-07	1.90334e-06
CG1707	958.939	-0.593404	0.0946595	2.09669e-10	8.46348e-10
CG17075	192.149	-0.0590985	0.158552	0.699728	0.760665
CG17083	0	0	1.71398	NA	NA
CG17119	482.329	0.674591	0.147551	2.2842e-06	6.50479e-06
CG17121	1050.92	-1.88504	0.0998217	3.59838e-81	1.69124e-79
CG17122	37.5948	-0.429	0.341418	0.13985	0.195725
CG17124	193.32	-0.524486	0.174354	0.00166411	0.00332392
CG17127	1937.51	6.40895	0.216674	1.1773e-193	1.47984e-191
CG17154	0.130176	-0.0407061	1.21302	0.909878	NA
CG17163	132.476	1.13306	0.20198	2.36349e-09	8.79797e-09
CG17168	715.853	-0.502063	0.111064	4.16934e-06	1.1486e-05
CG17180	160.505	-0.0946315	0.173573	0.570008	0.64902
CG17186	95.1412	-0.620005	0.236155	0.00439848	0.00816687
CG17187	126.965	-1.46429	0.242229	6.90781e-11	2.8876e-10
CG17190	554.849	-1.41728	0.115908	1.13368e-35	1.70209e-34
CG17193	0.130176	-0.0407061	1.21302	0.909878	NA
CG17199	0	0	1.71398	NA	NA
CG17202	271.112	-0.454957	0.167068	0.00459013	0.00850228
CG17209	657.228	0.357796	0.116376	0.00172644	0.00344206
CG1722	57.2719	-3.90852	0.525784	1.37231e-14	7.57645e-14
CG17230	197.869	-1.90261	0.179204	5.45875e-28	5.94849e-27
CG17234	0.774676	0.356206	1.32774	0.371774	0.458567
CG17237	0.953723	0.444773	1.11212	0.295832	0.377205
CG17242	0	0	1.71398	NA	NA
CG17244	92.0099	-0.607353	0.267428	0.0118352	0.0206153
CG17249	328.941	0.347929	0.152214	0.0182087	0.0309004
CG17258	10.8052	-0.921487	0.62589	0.0273184	0.0447306
CG17259	1873.67	0.292476	0.0829968	0.000373955	0.000818641
CG17264	768.649	-10.0527	0.844834	6.0444e-35	8.7353e-34
CG17266	60.9062	-1.33186	0.301713	6.66716e-07	2.00758e-06
CG17272	448.398	0.544593	0.145022	0.000107327	0.000252328
CG17283	0.323845	0.0440678	1.21345	0.902494	NA
CG17287	0	0	1.71398	NA	NA
CG17294	249.927	-0.411543	0.159807	0.00757401	0.013605
CG17300	0	0	1.71398	NA	NA
CG17321	98.0933	-0.891585	0.272769	0.000267993	0.000597566
CG17325	1023.08	-2.21217	0.433998	5.25908e-09	1.90136e-08
CG17327	248.013	-1.27433	0.185833	5.266e-13	2.57815e-12
CG17328	95.5294	-0.151708	0.217991	0.457602	0.542875
CG17329	3.06397	-0.624441	1.12136	0.173869	0.237253
CG17349	0.168747	0.130421	1.23553	0.720184	NA
CG17350	5098.79	1.50759	0.105077	4.69315e-48	1.07485e-46
CG1737	1622.42	0.136919	0.0897122	0.122834	0.174808
CG17378	127.997	-0.773942	0.213795	0.000104709	0.000246818
CG1738	52.5117	-0.437103	0.299857	0.0983273	0.143599
CG17385	843.349	-0.0510329	0.0958204	0.589719	0.665574
CG17386	50.0721	1.36571	0.35254	6.51758e-06	1.75874e-05
CG17404	1.26551	-0.584348	1.33752	0.200709	0.268546
CG17454	856.581	0.0797399	0.149875	0.583327	0.660566
CG1746	16233.4	-0.0290467	0.108219	0.78509	0.828629
CG17470	10.0929	-3.75857	1.40474	0.000124011	0.000289163
CG17475	0.130176	-0.0407061	1.21302	0.909878	NA
CG17493	1691.41	1.23732	0.116302	1.62139e-27	1.73882e-26
CG17528	1679.68	0.216817	0.0975777	0.0243727	0.0402366
CG17544	1533.35	0.524086	0.12359	1.446e-05	3.75753e-05
CG17564	0.259047	-0.113604	1.22547	0.754613	NA
CG17568	263.671	0.67468	0.158073	9.26739e-06	2.46023e-05
CG17570	0	0	1.71398	NA	NA
CG17572	2329.85	-0.454176	0.10357	8.44479e-06	2.2507e-05
CG17580	0.337494	0.198453	1.26382	0.592503	NA
CG17593	2170.23	0.623534	0.0925563	8.77404e-12	3.93885e-11
CG17597	1817.96	1.03327	0.109668	7.1613e-22	6.04794e-21
CG17598	1876.74	0.857639	0.103746	3.99799e-17	2.58174e-16
CG17599	295.752	0.434708	0.15999	0.0048272	0.00891088
CG17625	0.12887	-0.0407061	1.21302	0.909878	NA
CG17633	3.07121	-0.318491	0.849632	0.421863	0.507155
CG17636	0.454021	-0.0298752	1.17536	0.934555	0.948595
CG1764	247.066	0.841748	0.149124	4.98362e-09	1.80298e-08
CG17648	0	0	1.71398	NA	NA
CG17650	5.54484	-4.41187	1.67129	0.000121937	0.000285065
CG17652	117.501	-0.547717	0.237835	0.0124704	0.0216033
CG17658	9.99037	3.18048	1.08529	5.71594e-05	0.000138977
CG17669	4.89848	-0.480193	0.701342	0.233508	0.307083
CG17672	3.53102	-1.12756	1.25405	0.0437826	0.0687522
CG17680	249.451	-0.540879	0.144972	0.000119032	0.000278514
CG17681	104.409	7.59864	0.875514	4.32261e-20	3.29531e-19
CG17683	2162.41	0.922112	0.0750354	2.45585e-35	3.56824e-34
CG17707	6.71795	-0.524384	0.65281	0.189548	0.25536
CG17717	3.33784	-1.70871	1.5997	0.0152408	0.0261762
CG17737	1803.51	0.936086	0.106943	4.67108e-19	3.32637e-18
CG17738	1.42191	-0.0132098	0.92146	0.971832	0.97762
CG17754	705.388	0.14488	0.18315	0.407571	0.493707
CG17760	12.6703	-1.34291	0.715862	0.00430961	0.00802945
CG17765	1024.66	-0.954775	0.109825	7.418e-19	5.2003e-18
CG17776	185.619	0.135096	0.266702	0.57645	0.654561
CG17778	56.8485	0.255124	0.270131	0.296108	0.377363
CG17780	0.193669	0.130421	1.23553	0.720184	NA
CG17784	0	0	1.71398	NA	NA
CG17819	0.815727	0.0128571	1.01096	0.972531	0.977777
CG17821	0.531163	0.316931	1.26242	0.42297	0.507808
CG17829	165.211	-0.665065	0.19924	0.000396981	0.0008638
CG17834	1881.23	-0.293646	0.100955	0.00317602	0.00606801
CG17840	770.138	0.297456	0.109623	0.00579485	0.010603
CG17843	447.063	0.532169	0.136923	6.46379e-05	0.000155829
CG1785	597.22	-0.0711327	0.115809	0.531649	0.613165
CG17855	5.52046	-0.688656	0.738771	0.107045	0.154741
CG1789	281.875	-0.117565	0.168617	0.468582	0.553956
CG17896	2948.74	-0.286342	0.11603	0.0119247	0.0207377
CG17904	664.224	-0.460814	0.125166	0.000166006	0.000381003
CG17917	0	0	1.71398	NA	NA
CG17919	14290.7	0.650578	0.0682948	8.40316e-22	7.07463e-21
CG17944	0	0	1.71398	NA	NA
CG17959	0.259047	-0.113604	1.22547	0.754613	NA
CG17982	273.886	0.353839	0.14894	0.0142478	0.024541
CG17985	481.129	-0.245135	0.125311	0.0456061	0.0714702
CG17994	50.0675	0.574202	0.319156	0.037986	0.0603334
CG17996	154.818	-0.49178	0.205975	0.0111564	0.0194706
CG18011	224.736	-0.880608	0.159904	9.71596e-09	3.44585e-08
CG18031	4.99607	-2.81543	1.74774	0.00211126	0.00414657
CG18063	1.42537	-0.582462	1.11543	0.196697	0.263677
CG1809	9.1359	-1.30082	0.799138	0.0082361	0.0147037
CG18095	4.55389	4.3905	1.81777	0.000201119	0.000456167
CG1812	328.87	-0.691726	0.15077	2.02773e-06	5.81736e-06
CG18132	0	0	1.71398	NA	NA
CG18135	3109.25	0.437473	0.130183	0.000575096	0.00121993
CG18136	92.1598	-0.730835	0.251203	0.00141063	0.0028524
CG18155	34.9719	0.261298	0.331626	0.359035	0.444578
CG18179	846.649	2.68281	0.143159	4.48377e-80	2.07135e-78
CG18190	31.2159	-0.25756	0.958625	NA	NA
CG18268	65.9089	0.0315296	0.266876	0.896357	0.920892
CG18269	0	0	1.71398	NA	NA
CG18273	620.212	-0.188216	0.116415	0.0995557	0.145118
CG18278	522.219	-0.100075	0.119111	0.391715	0.47782
CG18292	343.995	-0.30444	0.134896	0.0206256	0.0345571
CG1835	7.98867	-2.57062	1.32134	0.00100755	0.0020675
CG18371	2.4757	-0.727677	1.09416	0.125749	0.178392
CG1840	379.225	1.6008	0.223054	2.48224e-14	1.33897e-13
CG18418	0	0	1.71398	NA	NA
CG18446	28.1118	-0.120864	0.546441	0.740105	0.793547
CG18449	0.337494	0.198453	1.26382	0.592503	NA
CG18467	5.41337	-0.535646	0.672296	0.18452	0.249896
CG1847	281.591	-0.38535	0.136628	0.00378015	0.00711162
CG18473	9.54713	0.455137	0.562314	0.228988	0.301873
CG18480	0.646385	0.0719073	1.04923	0.847568	0.882509
CG1850	1.48813	-1.00758	1.46873	0.0705142	0.10655
CG18507	2983.28	-0.516109	0.115834	5.5147e-06	1.49784e-05
CG18536	11.1857	-5.80057	1.33942	5.614e-07	1.7095e-06
CG18537	0.35586	0.0440678	1.21345	0.902494	NA
CG18539	0.337494	0.198453	1.26382	0.592503	NA
CG18568	0.552719	-0.260761	1.2206	0.500678	0.585243
CG18577	0.130176	-0.0407061	1.21302	0.909878	NA
CG18599	0	0	1.71398	NA	NA
CG18609	0.257741	-0.113007	1.22535	0.755829	NA
CG18622	341.955	-2.04141	0.152795	1.8965e-42	3.62211e-41
CG18624	1200.87	-0.113805	0.0838269	0.170494	0.233119
CG18643	53.9738	0.0267447	0.276195	0.914377	0.934052
CG18661	148.589	0.18887	0.208689	0.336622	0.421153
CG18662	3.64807	0.122442	0.663265	0.743818	0.796422
CG18666	0.130176	-0.0407061	1.21302	0.909878	NA
CG18731	242.113	0.0488084	0.166108	0.760319	0.81047
CG18766	796.515	0.159575	0.10938	0.138104	0.193683
CG18808	3.37326	-0.820829	0.998779	0.0870349	0.128601
CG18810	1.02698	0.779391	1.40688	0.121773	0.173435
CG18812	10600.2	0.80725	0.0739714	3.40382e-28	3.73936e-27
CG1885	508.508	1.47982	0.183379	3.14113e-17	2.0406e-16
CG18858	2027.52	0.554617	0.105841	9.92517e-08	3.27907e-07
CG18869	4.54915	0.784497	0.840377	0.0834613	0.123965
CG1888	485.548	-0.359462	0.140569	0.00855573	0.0152418
CG1890	295.347	1.04448	0.145674	1.16752e-13	6.00425e-13
CG1902	1486.03	1.0555	0.101135	2.52646e-26	2.57166e-25
CG1907	1660.7	0.0511609	0.0885511	0.55928	0.638687
CG1909	525.01	-1.13774	0.119819	2.48581e-22	2.15317e-21
CG1927	5611.28	0.206209	0.0718637	0.00385485	0.00724711
CG1943	1497.64	1.17501	0.118933	5.11925e-24	4.72984e-23
CG1951	796.899	0.0210238	0.116545	0.854218	0.887553
CG1958	0.168747	0.130421	1.23553	0.720184	NA
CG1968	936.406	-0.905083	0.122706	4.05475e-14	2.14862e-13
CG1970	8466.18	-0.208054	0.063388	0.000965724	0.00199303
CG1971	88.1209	-4.48777	0.421804	4.16354e-27	4.3953e-26
CG1983	328.953	-0.139621	0.151005	0.340176	0.424728
CG1986	0	0	1.71398	NA	NA
CG1988	0.337494	0.198453	1.26382	0.592503	NA
CG1998	1667.13	1.71857	0.0996116	3.20199e-68	1.16153e-66
CG2004	1715.86	0.752406	0.125765	8.6061e-10	3.3297e-09
CG2006	106.187	0.673839	0.273589	0.00606852	0.0110551
CG2021	88.019	0.337221	0.26956	0.166265	0.228086
CG2023	283.652	0.852073	0.193943	3.20583e-06	8.95017e-06
CG2025	1150.96	0.630758	0.0898924	1.2122e-12	5.81359e-12
CG2034	284.749	-0.667194	0.147902	3.10137e-06	8.66747e-06
CG2051	541.925	0.265816	0.120714	0.0246496	0.0406441
CG2053	1.87878	1.64675	1.82342	0.0214704	0.0358282
CG2059	658.172	-0.886967	0.119332	2.80421e-14	1.50514e-13
CG2061	278.812	-0.43915	0.150917	0.00264399	0.00510932
CG2063	419.856	-1.23952	0.144118	6.52593e-19	4.59878e-18
CG2064	570.981	2.58304	0.166571	5.14582e-56	1.42632e-54
CG2076	3215.53	0.0527789	0.143182	0.704681	0.76428
CG2107	1861.72	0.458645	0.0981764	2.16732e-06	6.19679e-06
CG2111	1.90678	0.189493	0.865513	0.620805	0.692131
CG2113	0	0	1.71398	NA	NA
CG2124	154.478	0.668	0.195096	0.000289066	0.000642171
CG2129	193.311	0.702771	0.196638	0.000151506	0.000349654
CG2135	2089.55	1.84398	0.0819575	1.05651e-113	7.32109e-112
CG2144	906.872	-0.151494	0.109218	0.1586	0.219016
CG2145	6267.07	0.56295	0.0874809	7.55945e-11	3.1454e-10
CG2150	132.777	7.59676	0.787781	5.59931e-24	5.16455e-23
CG2200	392.797	-1.17713	0.136692	7.20388e-19	5.05675e-18
CG2201	3696.03	-0.774586	0.0796263	8.58606e-23	7.53371e-22
CG2224	463.663	0.796504	0.120375	1.27394e-11	5.62555e-11
CG2254	19369.5	-0.719899	0.0865544	3.89345e-17	2.51724e-16
CG2263	1054.96	0.37289	0.108652	0.000483627	0.00104102
CG2267	0.65532	-0.128857	1.14181	0.730131	0.785345
CG2291	0	0	1.71398	NA	NA
CG2316	4660.3	-0.543437	0.171767	0.000954657	0.00197245
CG2321	50.1674	-1.21743	0.330732	2.13709e-05	5.44345e-05
CG2336	0.330938	0.0440678	1.21345	0.902494	NA
CG2444	4.60169	0.333265	0.676282	0.390624	0.477027
CG2453	316.52	-0.495813	0.147171	0.000507664	0.00108929
CG2493	2268.84	-0.493367	0.126074	6.20341e-05	0.000149886
CG2533	1.62501	0.103166	0.817177	0.783876	0.828157
CG2540	209.23	-1.00589	0.172971	1.07147e-09	4.12193e-09
CG2543	71.0458	-1.32254	0.301856	7.96357e-07	2.3807e-06
CG2556	117.554	-0.0730253	0.227992	0.730926	0.785887
CG2574	0	0	1.71398	NA	NA
CG2577	0.168747	0.130421	1.23553	0.720184	NA
CG2604	14585.9	-0.404239	0.0870179	2.65499e-06	7.48188e-06
CG2608	187.324	-1.47313	0.177826	5.38334e-18	3.61902e-17
CG2611	113.092	1.75422	0.236446	3.13112e-15	1.80616e-14
CG2614	411.02	-0.299621	0.15195	0.0417292	0.0657761
CG2617	33.3698	-1.9115	0.463937	7.7296e-07	2.31332e-06
CG2680	49.023	1.18359	0.39985	0.000314929	0.000695625
CG2681	6.02439	-4.63255	1.60023	6.36148e-05	0.000153431
CG2685	315.829	-0.597067	0.135105	5.57707e-06	1.51402e-05
CG2691	1218.36	0.166115	0.114008	0.138044	0.193648
CG2701	1055.29	-0.384409	0.107911	0.000292867	0.000649547
CG2712	125.53	-0.314438	0.194794	0.0887694	0.130807
CG2750	1.87866	-1.35634	1.63059	0.0343808	0.0551256
CG2765	930.686	0.619661	0.105483	2.30656e-09	8.59198e-09
CG2772	22.9332	-6.93104	1.26557	9.19125e-10	3.54848e-09
CG2789	7302.79	-0.241591	0.0903871	0.00687004	0.0124065
CG2794	275.174	-0.876139	0.150926	1.74201e-09	6.58433e-09
CG2807	2613.53	0.176754	0.0859645	0.0378051	0.0600989
CG2811	425.821	0.477926	0.15133	0.00109664	0.00224309
CG2816	134.675	-4.60673	0.340048	1.80806e-42	3.46545e-41
CG2818	881.798	-0.12328	0.101256	0.216986	0.287665
CG2837	10.4025	-1.12591	0.826941	0.0201463	0.0338275
CG2852	5467.02	0.89019	0.0862425	1.4726e-25	1.46312e-24
CG2854	7.66164	2.52294	1.12515	0.000447423	0.000966169
CG2862	1012.21	-0.315456	0.111961	0.00414028	0.00772461
CG2875	264.059	-0.878385	0.149089	1.02838e-09	3.95896e-09
CG2889	294.934	-0.162984	0.158882	0.288305	0.368826
CG2898	17.9811	-0.365789	0.490801	0.305143	0.386978
CG2901	1.55887	0.126316	0.879837	0.738404	0.792194
CG2906	143.369	-0.24861	0.176777	0.141997	0.19837
CG2909	356.342	0.173256	0.136348	0.19244	0.258612
CG2911	98.4085	-1.50533	0.279262	2.96974e-09	1.0938e-08
CG2918	12515.1	0.569011	0.140085	2.88992e-05	7.24156e-05
CG2921	399.245	-0.354208	0.124382	0.00360991	0.0068032
CG2924	1114.37	0.638594	0.0863387	7.35402e-14	3.82934e-13
CG2926	4970.4	0.451165	0.0829312	3.91814e-08	1.32941e-07
CG2931	312.395	-0.070093	0.142421	0.612933	0.685617
CG2938	765.284	-0.120217	0.11331	0.280309	0.360303
CG2964	0.162191	-0.0407061	1.21302	0.909878	NA
CG2972	600.011	0.209066	0.125673	0.089128	0.131299
CG2990	23.2358	-0.0440221	0.587983	0.904909	0.927034
CG2991	2870.31	0.29892	0.124325	0.0140261	0.0242054
CG30008	7.39802	-0.046902	0.572834	0.8983	0.922362
CG30015	4048.41	-0.444063	0.08481	1.21993e-07	3.99376e-07
CG30016	5.87416	-3.08684	1.78393	0.00142532	0.00287897
CG30022	1749.06	-0.874561	0.115282	9.03907e-15	5.06807e-14
CG30026	1712.3	0.658086	0.118791	1.50509e-08	5.27563e-08
CG30033	2567.42	1.49348	0.398701	8.01441e-06	2.14127e-05
CG30051	130.631	-0.851028	0.25074	0.0001939	0.00044109
CG30053	62.9695	0.727539	0.2754	0.00319124	0.00609493
CG30065	0.4958	-0.031037	1.16016	0.932312	0.947239
CG3008	1182.92	-0.231302	0.1019	0.021306	0.0355868
CG30080	0	0	1.71398	NA	NA
CG30083	5.37792	-4.3336	1.69094	0.000148253	0.00034244
CG30093	1.19573	0.96303	1.49864	0.0792707	0.118261
CG30096	41.3405	-0.54994	0.336099	0.0555994	0.0858614
CG30098	9.72703	-4.50943	1.46834	4.2385e-05	0.000104369
CG30099	1.07476	-0.351738	1.08612	0.388972	0.475225
CG30101	14.6757	-1.87058	0.759946	0.000359777	0.000789844
CG30105	49.6656	0.102622	0.296463	0.696049	0.758649
CG3011	1639.9	-0.841035	0.0978093	2.46728e-18	1.67533e-17
CG30118	6086.44	-0.0629453	0.0921012	0.489363	0.575001
CG30122	5099.02	0.73203	0.0667729	2.42582e-28	2.6813e-27
CG30148	29.7486	-1.45871	0.453134	6.35578e-05	0.000153362
CG30152	524.09	-0.267416	0.111161	0.0143999	0.024795
CG30154	25.3283	0.279521	0.456427	0.416595	0.502663
CG3016	768.459	-0.271942	0.122881	0.0238335	0.0394428
CG30172	9.19314	-1.44377	0.904795	0.00679072	0.012276
CG30178	0.459808	-0.0506913	1.09723	0.891303	0.917097
CG30183	443.739	0.188335	0.120674	0.111362	0.1604
CG30184	1.64333	1.07123	1.63022	0.0639616	0.0973953
CG30192	0.162191	-0.0407061	1.21302	0.909878	NA
CG30197	12768.8	0.863824	0.0874004	1.40203e-23	1.27148e-22
CG3021	333.551	-0.193861	0.151809	0.187504	0.253428
CG30222	0.387917	-0.17383	1.23485	0.638793	NA
CG30268	0.337494	0.198453	1.26382	0.592503	NA
CG30275	0	0	1.71398	NA	NA
CG30291	1324.28	-0.547828	0.104891	1.10358e-07	3.63047e-07
CG3032	76.1477	0.641936	0.26809	0.00790372	0.0141549
CG30324	0.596541	0.0517345	1.0565	0.889669	0.916462
CG30343	3.7363	-1.27054	1.32501	0.0318721	0.0515466
CG30349	724.372	0.160208	0.0968079	0.0937055	0.137369
CG30350	0.635111	0.200903	1.17127	0.597635	0.672203
CG30355	0.130176	-0.0407061	1.21302	0.909878	NA
CG30357	51.8429	-8.18849	1.24009	2.9033e-13	1.45299e-12
CG3036	5748.43	-0.2275	0.0997545	0.0207778	0.0347799
CG30369	0	0	1.71398	NA	NA
CG30373	332.885	-1.00827	0.136131	2.28028e-14	1.23249e-13
CG30376	0.635111	0.200903	1.17127	0.597635	0.672203
CG30377	359.063	3.4689	0.535342	5.61248e-12	2.5578e-11
CG3038	158.914	-1.3954	0.191228	1.59523e-14	8.76239e-14
CG30382	2445.05	-0.125582	0.0798337	0.112578	0.161797
CG30383	1.5876	-1.04479	1.50067	0.0653399	0.0992029
CG30391	0	0	1.71398	NA	NA
CG30392	372.628	-0.128178	0.136302	0.334803	0.41928
CG30398	538.525	12.1725	1.17823	4.84148e-27	5.03235e-26
CG3040	454.642	0.356656	0.11666	0.00183115	0.00363206
CG30401	0.130176	-0.0407061	1.21302	0.909878	NA
CG30411	309.481	-3.10087	0.178567	7.59893e-69	2.79403e-67
CG30412	0.68684	-0.179001	1.0603	0.640087	0.709822
CG30413	0	0	1.71398	NA	NA
CG30417	0.12887	-0.0407061	1.21302	0.909878	NA
CG30423	861.735	0.280996	0.0952061	0.00280111	0.00538599
CG30428	308.968	0.391696	0.139116	0.0038047	0.00715532
CG30429	0.81751	-0.190058	1.13487	0.618241	0.689842
CG30431	42.3106	-0.0892472	0.311345	0.743223	0.795942
CG30432	0	0	1.71398	NA	NA
CG3045	105.674	0.00134393	0.210662	0.994592	0.995513
CG30479	0.645658	-0.309676	1.2249	0.435092	0.519477
CG30480	9.66547	-0.66088	0.617894	0.0996811	0.145223
CG30487	0	0	1.71398	NA	NA
CG30491	304.004	-0.516317	0.155302	0.000573827	0.0012182
CG30495	628.12	-1.04046	0.155491	3.48715e-12	1.62064e-11
CG30503	927.215	2.79643	0.126273	2.76549e-110	1.82286e-108
CG3061	4040.8	0.892001	0.0885708	1.93596e-24	1.82935e-23
CG3062	0.518093	-0.247954	1.21715	0.519616	0.602187
CG3071	421.182	-0.298589	0.127155	0.0163219	0.0279089
CG3077	468.911	0.422029	0.143932	0.00252677	0.00489681
CG3078	81.3519	-6.12727	0.68665	2.54745e-20	1.96419e-19
CG3081	3.03374	-0.472433	0.794127	0.251115	0.326347
CG3088	345381	0.158225	0.132433	0.22107	0.292505
CG3092	0	0	1.71398	NA	NA
CG31007	1.17604	-0.144965	0.922255	0.702885	0.763177
CG31008	0	0	1.71398	NA	NA
CG31016	0	0	1.71398	NA	NA
CG3104	842.497	-0.465427	0.159198	0.00242749	0.00471963
CG31041	4.60209	0.155211	0.650849	0.679334	0.744183
CG31050	0	0	1.71398	NA	NA
CG31051	39.2498	-0.121607	0.328956	0.667803	0.733932
CG3106	2.54785	0.090821	0.700091	0.808347	0.847549
CG31068	0.168747	0.130421	1.23553	0.720184	NA
CG31093	0	0	1.71398	NA	NA
CG31125	30.5652	-0.406693	0.340477	0.160859	0.221684
CG31128	0	0	1.71398	NA	NA
CG31142	105.213	-0.199455	0.252381	0.388239	0.474437
CG31156	388.866	-1.58138	0.134043	1.4847e-33	2.06293e-32
CG31157	0	0	1.71398	NA	NA
CG31174	2.59878	-0.818738	1.09401	0.0949275	0.139009
CG31178	0.12887	-0.0407061	1.21302	0.909878	NA
CG3119	96.9633	1.73637	0.303558	2.84684e-10	1.14063e-09
CG31200	4706.65	-4.50709	0.113594	0	0
CG31211	2172.73	-0.453092	0.0758719	1.72632e-09	6.52959e-09
CG31226	0.168747	0.130421	1.23553	0.720184	NA
CG31235	0.766594	0.114223	1.10499	0.760376	0.81047
CG3124	1.14135	0.404721	1.21483	0.332309	0.416735
CG31248	490.089	-5.98645	0.265065	4.24226e-114	2.97784e-112
CG31249	135.063	-0.435679	0.196464	0.0191339	0.0322881
CG31251	49.9728	-1.59855	0.391725	1.57099e-06	4.57006e-06
CG31259	0.725411	-0.0215268	1.01879	0.954016	0.962025
CG31262	6.77501	0.138292	1.11205	0.713321	0.771717
CG31275	0	0	1.71398	NA	NA
CG31278	91.9025	-0.514801	0.247616	0.0232377	0.0385158
CG31286	0.337494	0.198453	1.26382	0.592503	NA
CG31287	2.28879	0.0127292	0.703002	0.972771	0.977837
CG31301	775.009	-0.137745	0.101141	0.167282	0.229308
CG31326	4639.91	-0.294134	0.0981784	0.002395	0.00466318
CG31337	0.648763	-0.243985	1.27897	0.518399	0.601405
CG31345	201.452	1.3719	0.174561	2.22008e-16	1.36981e-15
CG31357	920.102	0.61227	0.100653	6.52887e-10	2.54607e-09
CG31360	79.4148	-8.84437	1.22627	2.78357e-15	1.61776e-14
CG31380	1.77181	-0.232204	0.843295	0.548151	0.628235
CG31381	64.6759	-0.392979	0.254763	0.091087	0.133857
CG31407	0.168747	0.130421	1.23553	0.720184	NA
CG31437	0.162191	-0.0407061	1.21302	0.909878	NA
CG31446	0.386611	-0.169433	1.24225	0.645862	NA
CG31463	0.337494	0.198453	1.26382	0.592503	NA
CG31464	0	0	1.71398	NA	NA
CG31468	0	0	1.71398	NA	NA
CG31477	49.3298	-5.96909	0.899114	1.95385e-12	9.32089e-12
CG31482	2.10991	0.552355	1.12113	0.215416	0.286005
CG3149	1156.57	0.901774	0.0978645	7.89325e-21	6.26476e-20
CG31496	1.30495	-0.492992	1.08143	0.255182	0.331473
CG31516	53.2241	2.0858	0.397318	2.53638e-09	9.4027e-09
CG31522	14764.5	1.38844	0.0970199	1.02324e-47	2.29486e-46
CG31523	29124.2	1.46767	0.0851056	5.59489e-68	2.01602e-66
CG31528	0.298923	0.0440678	1.21345	0.902494	NA
CG31546	5.24367	1.75697	1.26429	0.0072364	0.0130332
CG31548	724.007	-1.63979	0.125539	1.82309e-40	3.26284e-39
CG31550	1560.24	-0.934644	0.0908825	1.88364e-25	1.85786e-24
CG31560	0	0	1.71398	NA	NA
CG3160	732.371	0.865531	0.103772	2.09182e-17	1.37212e-16
CG31609	0	0	1.71398	NA	NA
CG31612	46.7689	-5.28447	0.708767	1.08224e-14	6.03665e-14
CG3163	292.967	0.370597	0.156312	0.0141284	0.0243585
CG31644	0.46767	0.119314	1.18839	0.746071	0.797835
CG31646	107.796	-0.0569499	0.201265	0.764919	0.813318
CG31650	356.559	-0.541889	0.150246	0.000192683	0.000438506
CG31673	669.395	-1.37368	0.136794	5.66663e-25	5.48892e-24
CG31674	126.124	-2.91414	0.282385	1.64527e-26	1.68104e-25
CG31676	2143.51	0.238253	0.104851	0.0210579	0.0352159
CG3168	1122.85	0.123204	0.108399	0.248146	0.323113
CG31688	206.282	-0.252839	0.175815	0.133389	0.187689
CG31689	3912.12	1.87652	0.0949536	1.48424e-88	7.94288e-87
CG31698	0	0	1.71398	NA	NA
CG31706	87.2753	1.14957	0.27215	2.68538e-06	7.56357e-06
CG31708	15.91	0.096869	0.412195	0.766357	0.814424
CG31710	60.1502	-0.00417358	0.315939	0.987907	0.990657
CG31728	78.9371	-2.80105	0.345675	1.16933e-17	7.78354e-17
CG31730	0.130176	-0.0407061	1.21302	0.909878	NA
CG31743	7195.43	-0.371876	0.069848	8.28032e-08	2.75247e-07
CG31777	141.226	-0.895488	0.223309	1.51441e-05	3.92396e-05
CG31778	159.273	-3.76704	0.267267	7.27063e-46	1.55327e-44
CG31784	0	0	1.71398	NA	NA
CG31787	0	0	1.71398	NA	NA
CG31788	0.168747	0.130421	1.23553	0.720184	NA
CG31789	0	0	1.71398	NA	NA
CG31798	1.92377	1.12827	1.43759	0.0514765	0.08003
CG31803	2.72634	-0.87319	1.11894	0.081806	0.12174
CG31807	0	0	1.71398	NA	NA
CG31812	36.6819	-0.00298726	0.385017	0.992402	0.994057
CG31816	0.664563	0.386925	1.27849	0.34605	0.430372
CG31819	0	0	1.71398	NA	NA
CG31827	11.0725	4.08509	1.16434	1.24978e-05	3.2649e-05
CG31835	0.688146	-0.17674	1.06635	0.643965	0.712514
CG31848	0.257741	-0.113007	1.22535	0.755829	NA
CG31849	21.2994	-1.11434	0.519278	0.00393361	0.0073721
CG31851	0.130176	-0.0407061	1.21302	0.909878	NA
CG31855	195.304	0.686101	0.156342	5.22836e-06	1.42293e-05
CG31862	0.193669	0.130421	1.23553	0.720184	NA
CG31867	0	0	1.71398	NA	NA
CG31869	869.353	0.344215	0.125353	0.00499758	0.00920966
CG31870	0.130176	-0.0407061	1.21302	0.909878	NA
CG31871	5411.25	0.961129	0.0965084	4.7695e-24	4.42181e-23
CG31875	8.8205	-5.38445	1.41292	4.25924e-06	1.17093e-05
CG31908	981.982	0.0230394	0.108045	0.828495	0.865652
CG31910	0.533065	0.174528	1.11082	0.646528	0.714911
CG31913	1.73974	-0.213211	0.950267	0.581611	0.659175
CG31917	473.644	0.703323	0.12986	2.70797e-08	9.29898e-08
CG3192	2285.65	-0.0987555	0.0932891	0.2841	0.364222
CG31922	31.8046	-1.01783	0.419462	0.00250171	0.00485696
CG31928	0.322539	0.0440678	1.21345	0.902494	NA
CG31933	0	0	1.71398	NA	NA
CG31937	1611.45	-0.164014	0.0888765	0.0621279	0.0950527
CG31949	0	0	1.71398	NA	NA
CG31950	89.0573	1.17023	0.241693	1.34336e-07	4.36612e-07
CG31957	187.429	1.14066	0.216223	1.51164e-08	5.29171e-08
CG31960	0.297617	0.0440678	1.21345	0.902494	NA
CG31961	583.582	0.891597	0.139289	3.99218e-11	1.69636e-10
CG31974	49.7632	-0.857374	0.324844	0.00221894	0.00434385
CG31975	0.421237	-0.232729	1.16424	0.54671	0.627036
CG31976	0.130176	-0.0407061	1.21302	0.909878	NA
CG3198	617.802	-0.970117	0.105463	7.27347e-21	5.80696e-20
CG3199	0	0	1.71398	NA	NA
CG31997	13703.3	1.52305	0.113592	2.23757e-42	4.25847e-41
CG31999	1919.57	-0.609464	0.129521	1.39371e-06	4.06969e-06
CG32017	825.108	-1.58519	0.183761	2.28971e-19	1.66342e-18
CG32023	0	0	1.71398	NA	NA
CG32032	477.062	-1.20438	0.154967	7.11656e-16	4.28818e-15
CG32036	8.34088	3.01331	1.25183	0.000259023	0.00057876
CG32037	61.1669	-6.277	0.88571	6.26905e-14	3.27681e-13
CG32039	217.736	-0.0604164	0.177019	0.721717	0.779085
CG32055	5.18924	-1.97161	1.4977	0.00705068	0.0127199
CG32061	0.486573	-0.200016	1.25553	0.590963	0.665865
CG32068	942.387	-1.66545	0.14244	4.46684e-33	6.06615e-32
CG32079	0	0	1.71398	NA	NA
CG32091	1161.38	0.396737	0.129332	0.00168202	0.00335846
CG32100	157.656	-1.02738	0.225172	8.31466e-07	2.48154e-06
CG3213	0.972606	0.34103	1.19156	0.399634	0.485725
CG32138	5889.74	0.401552	0.0772617	1.59142e-07	5.1109e-07
CG32141	1.56974	-0.341923	0.917388	0.395396	0.481441
CG32148	0	0	1.71398	NA	NA
CG3216	10.5602	-4.63089	1.47097	3.40592e-05	8.4795e-05
CG32170	2805.44	0.103418	0.107428	0.328141	0.412466
CG32202	70.7377	-1.66569	0.361984	1.27178e-07	4.14594e-07
CG3222	2.43244	-0.12655	0.806375	0.73733	0.791513
CG32225	143.233	-0.681817	0.18884	0.000139035	0.000321972
CG3223	612.03	1.03786	0.109783	5.19608e-22	4.42978e-21
CG32230	2559.3	-0.0157251	0.151444	0.914697	0.934052
CG32236	0	0	1.71398	NA	NA
CG32238	2.26184	-0.259137	0.794424	0.504116	0.588625
CG3224	466.371	0.333789	0.111673	0.00235284	0.00458936
CG32240	0	0	1.71398	NA	NA
CG3225	71.472	-0.552194	0.253832	0.0170268	0.0290133
CG3226	899.791	0.427055	0.160172	0.0056811	0.0104089
CG32260	47.3063	-0.251571	0.300747	0.343157	0.428015
CG32266	0.193669	0.130421	1.23553	0.720184	NA
CG32267	59.5137	0.0848048	0.268553	0.727354	0.783606
CG32276	681.678	-0.753492	0.524129	0.0460591	0.0721383
CG32295	0.599765	0.174312	1.17226	0.643551	0.712348
CG32298	0	0	1.71398	NA	NA
CG32299	0	0	1.71398	NA	NA
CG32302	0.193669	0.130421	1.23553	0.720184	NA
CG32319	0	0	1.71398	NA	NA
CG32335	1.57242	-0.279837	0.909586	0.477469	0.562494
CG32354	112.551	0.169887	0.233916	0.433626	0.517956
CG32364	70.0523	-8.65372	1.22965	1.07409e-14	5.99739e-14
CG3238	66.1529	-1.94287	0.333127	1.0699e-10	4.40763e-10
CG32395	0.362416	0.207207	1.2669	0.577528	NA
CG32425	570.465	-1.21749	0.115429	4.56688e-27	4.79288e-26
CG32428	958.279	1.54728	0.0910129	3.2197e-66	1.0809e-64
CG32441	1428.53	-0.315391	0.0942288	0.000701991	0.00147809
CG32448	136.13	-0.730448	0.234705	0.000731004	0.0015344
CG32459	1.65999	-0.673059	1.17736	0.153574	0.213001
CG32462	0.623305	-0.139063	1.06984	0.713196	0.771717
CG32486	2361.86	0.909409	0.0981651	4.84425e-21	3.91378e-20
CG3251	0	0	1.71398	NA	NA
CG32512	756.487	-0.432232	0.111497	7.93568e-05	0.000189705
CG32521	14575.2	0.807243	0.0794675	1.03737e-24	9.88891e-24
CG32523	70629.5	4.07953	0.128711	4.58142e-221	7.73831e-219
CG3253	28.379	-0.331081	0.354203	0.266475	0.34424
CG32551	1436.4	2.01145	0.165675	1.22351e-35	1.82681e-34
CG32554	47.8558	-0.382639	0.328495	0.176143	0.240235
CG32564	8.36934	2.75186	1.14398	0.000265858	0.00059305
CG3257	330.837	-0.571449	0.168583	0.000407796	0.000885552
CG32573	83.5412	0.465421	0.238002	0.0340414	0.05463
CG32579	250.332	-1.79274	0.169685	1.11995e-27	1.20825e-26
CG32590	125.738	0.475238	0.21913	0.020186	0.0338837
CG32591	381.355	7.09708	0.368028	1.29473e-84	6.42019e-83
CG3262	1046.08	0.627555	0.087418	3.78482e-13	1.87507e-12
CG32631	0	0	1.71398	NA	NA
CG32638	1133.9	0.231239	0.114156	0.0391823	0.0620329
CG32639	7.75115	-1.40081	0.978964	0.0104647	0.0183642
CG32641	1695.52	-0.536035	0.194154	0.00353932	0.00667948
CG32643	0.168747	0.130421	1.23553	0.720184	NA
CG32649	1434.48	-0.994643	0.107053	2.81751e-21	2.30737e-20
CG32655	0	0	1.71398	NA	NA
CG32668	302.648	-0.0153167	0.143414	0.912552	0.933095
CG32669	21.4026	-0.357119	0.38789	0.257985	0.334551
CG32687	1485.88	3.31898	0.103423	5.44057e-227	9.8021e-225
CG32694	1042.28	-1.24986	0.120071	1.7863e-26	1.82169e-25
CG32695	10.4753	-0.260171	0.506768	0.46858	0.553956
CG3270	45.6366	4.03138	0.520973	1.52339e-15	8.98897e-15
CG32712	1.05248	0.119274	0.924356	0.752469	0.803297
CG32720	2.91404	-2.47555	1.90765	0.0050677	0.00933568
CG32795	4109.32	1.01781	0.102071	3.46054e-24	3.24163e-23
CG3281	255.506	-0.706883	0.159877	4.26128e-06	1.17093e-05
CG32815	211.332	0.0681342	0.170385	0.677417	0.74226
CG32816	356.784	-4.32852	0.248668	1.79899e-68	6.56995e-67
CG32832	0.235447	0.130421	1.23553	0.720184	NA
CG32846	0.162191	-0.0407061	1.21302	0.909878	NA
CG32850	698.252	0.215462	0.134636	0.100865	0.146789
CG32856	44.8323	-2.43463	0.462192	2.04016e-09	7.6577e-09
CG3294	113.076	-1.77782	0.233959	7.65603e-16	4.60299e-15
CG32945	0.531163	0.316931	1.26242	0.42297	0.507808
CG3295	832.221	-0.0189302	0.123902	0.876039	0.906045
CG3301	739.339	-1.64822	0.244039	4.55749e-13	2.24551e-12
CG3303	2603.96	-3.03763	0.126469	7.83927e-129	6.62051e-127
CG33051	83.3948	-2.09744	0.309402	2.01977e-13	1.0241e-12
CG33052	255.722	0.114186	0.14233	0.409552	0.495884
CG33056	1357.48	0.28994	0.09214	0.00145236	0.00292802
CG3306	658.032	-0.178885	0.155007	0.23301	0.306652
CG33060	0	0	1.71398	NA	NA
CG33080	14905.3	1.34397	0.0766044	4.00514e-70	1.50332e-68
CG3309	382.607	0.871796	0.138872	9.46202e-11	3.91894e-10
CG33098	0	0	1.71398	NA	NA
CG33107	141.668	0.551992	0.18744	0.00193389	0.00381763
CG33109	10.6893	0.22643	0.50506	0.52691	0.608926
CG33110	2998.3	3.46459	0.106993	6.41933e-231	1.23916e-228
CG33129	3562.88	1.0984	0.0823834	1.92334e-41	3.548e-40
CG3313	232.921	0.440448	0.149737	0.00238549	0.00464828
CG33136	0.162191	-0.0407061	1.21302	0.909878	NA
CG33155	101.482	-0.22244	0.211955	0.264193	0.341914
CG33203	170.604	-0.0699013	0.16744	0.664509	0.730906
CG3321	2038.7	0.154738	0.137898	0.24948	0.324456
CG33213	103.369	0.564159	0.203788	0.00326668	0.00621704
CG33233	0.404194	0.230612	1.26183	0.54092	0.621925
CG33257	0	0	1.71398	NA	NA
CG33258	1.6647	-0.238602	0.827428	0.537406	0.618938
CG3326	12.0417	0.443726	0.49544	0.217549	0.288199
CG3328	4209.13	0.196804	0.0836241	0.0174991	0.0297899
CG33298	1803.12	0.694546	0.0841941	7.34999e-17	4.69028e-16
CG33299	0.235447	0.130421	1.23553	0.720184	NA
CG3330	2.5607	-0.228508	0.809572	0.553239	0.632858
CG33301	3138.7	8.87678	0.62535	4.41426e-48	1.01528e-46
CG33303	4116.96	0.826284	0.122136	4.23155e-12	1.9515e-11
CG33307	53.2414	-0.670325	0.336577	0.0197318	0.0331934
CG33325	0	0	1.71398	NA	NA
CG33339	0	0	1.71398	NA	NA
CG33340	1.49905	0.16009	1.02961	0.674639	0.73994
CG33342	0	0	1.71398	NA	NA
CG33346	3.37212	2.3073	1.80315	0.00592429	0.0108215
CG3335	565.576	0.542887	0.107771	2.9788e-07	9.32277e-07
CG3338	831.572	-0.613099	0.0953728	7.13479e-11	2.97329e-10
CG3342	250.024	-0.515482	0.172018	0.00175704	0.00349661
CG3345	2.19245	-0.244768	0.814453	0.527202	0.608996
CG33470	4346.27	-1.78813	0.165031	6.13423e-29	6.95084e-28
CG3348	97.3645	2.96086	0.412622	1.97791e-14	1.07768e-13
CG3349	0	0	1.71398	NA	NA
CG33506	267.742	-0.0783709	0.150001	0.590101	0.665727
CG33514	4.50039	0.628141	0.828535	0.147425	0.205422
CG3353	235.944	-0.188621	0.14928	0.192674	0.258798
CG33543	169.454	-0.820821	0.1837	2.49296e-06	7.05467e-06
CG3355	0	0	1.71398	NA	NA
CG33631	0.235447	0.130421	1.23553	0.720184	NA
CG33635	200.955	0.673877	0.179002	7.77428e-05	0.000185929
CG33645	2.84549	2.90066	2.03666	0.00299608	0.00574249
CG33671	991.777	0.808572	0.104444	3.30437e-15	1.89799e-14
CG33673	0	0	1.71398	NA	NA
CG33679	287.691	-10.7583	1.20481	2.41622e-21	1.98778e-20
CG33700	0.130176	-0.0407061	1.21302	0.909878	NA
CG33704	0	0	1.71398	NA	NA
[truncated: 4,295 more rows]
